# Supplementary material for: Diversity and prevalence of ANTAR RNAs across actinobacteria
Source: PubMed Central journal article supplement (PMC8164766; doi:10.1186/s12866-021-02234-x), 2021-05-29
Supplement: 12866_2021_2234_MOESM1_ESM.pdf [file 12866_2021_2234_MOESM1_ESM.pdf]

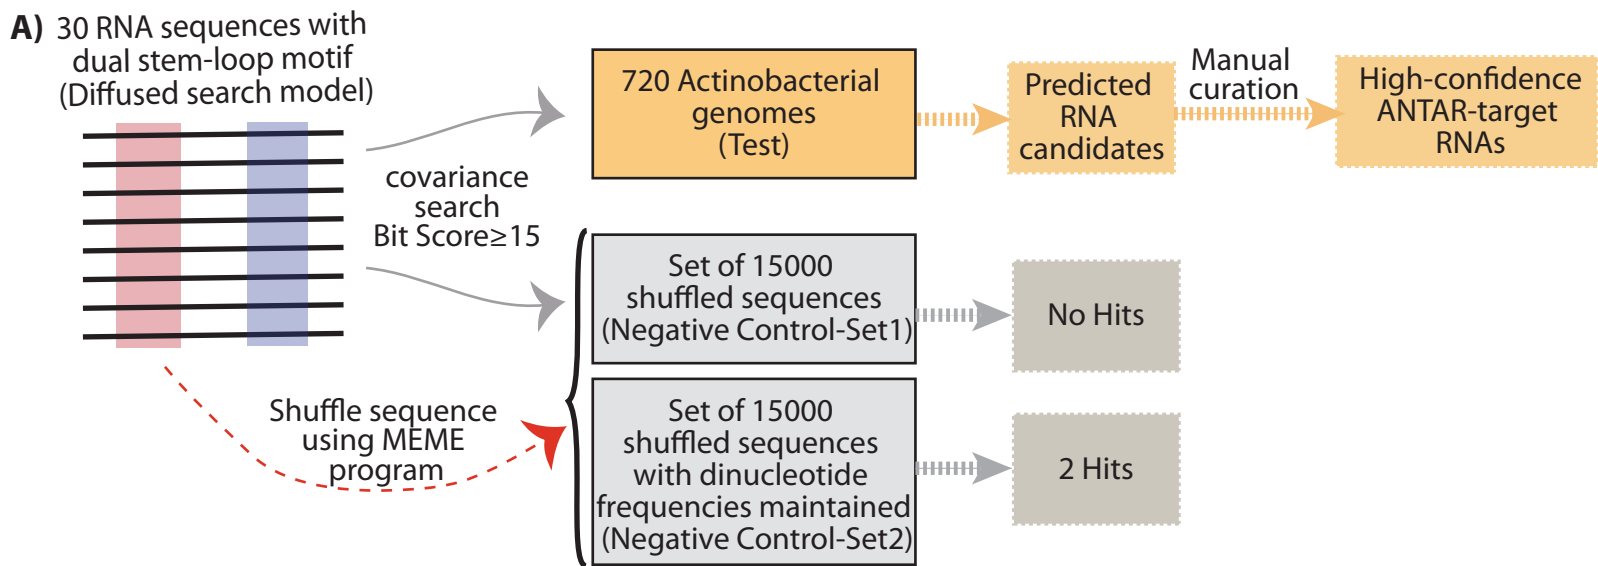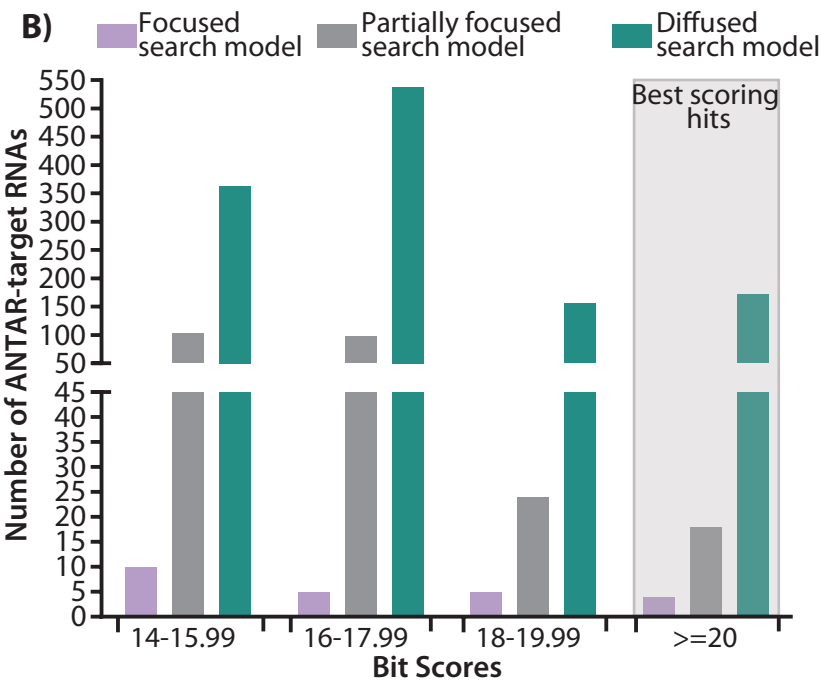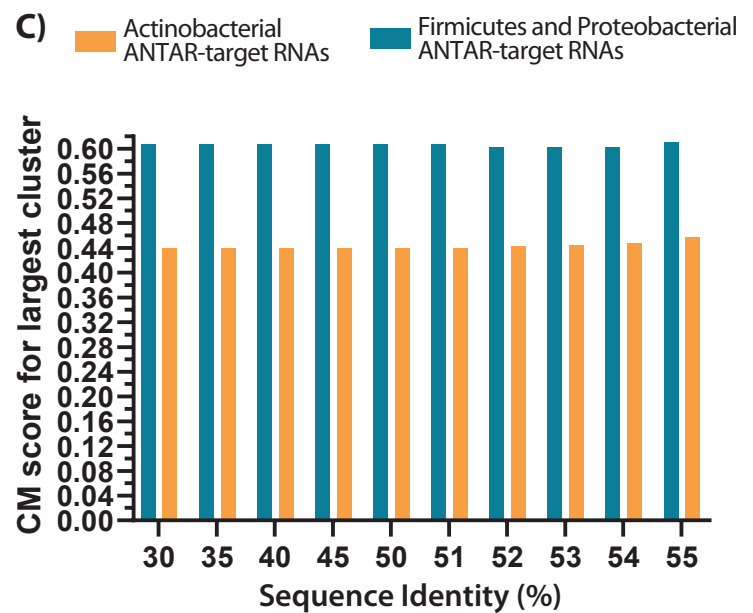

Fig S1. A) Schematic shows the steps followed to identify ANTAR-target RNAs across phylum actinobacteria. Diffused search model consisting of 30 sequences harboring the dual stem-loop (Red and Blue) structure motif was used for covariance searches. As a negative control, the sequences in the diffused search model were taken and shuffled to create 2 sets (gray). First negative control set (Set1) was obtained where the nucleotides in each sequence were shuffled (using  $kmer=1$ ) and Set2 was obtained by shuffling the sequences such that the dinucleotide frequencies are maintained (using  $kmer=2$ ). Covariance search was performed using diffused search model against actinobacterial genomes (test set, yellow) and negative control sets with a bit score threshold of 15.00. Our search identified RNA candidates from the test actinobacterial genomes but not from the negative control sets. Predicted RNA candidates from actinobacteria are manually curated to report on high confidence ANTAR-target RNAs. B) Bar plot shows the distribution of bit scores obtained for actinobacterial ANTAR-target RNAs identified using 3 search models (focused/ partially focused/ diffused). Bit scores report on the similarity of each RNA hit to the search model. Diffused search model yields RNAs of higher bit scores. C) RNA sets from firmicutes/ proteobacteria and actinobacteria were clustered using cmbuild. CM score distribution of the largest cluster obtained at varying sequence identity (30%-60%) is shown as bar plots.

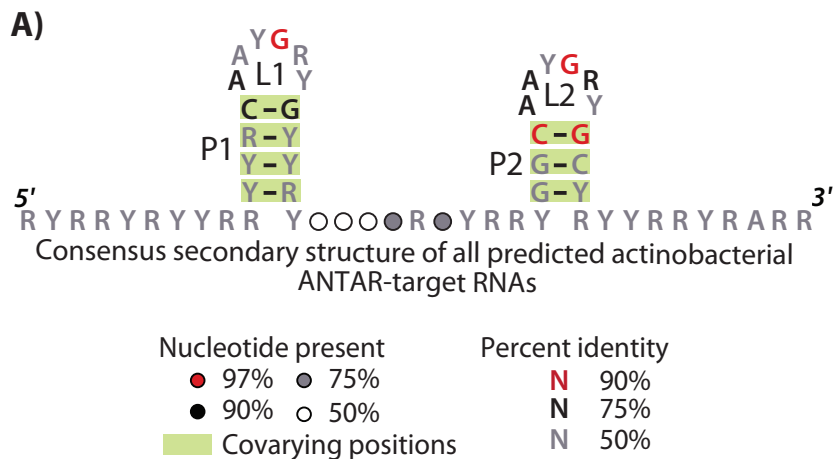

**B) Parameters for all ANTAR-target RNAs**

|                                    | RNA Pool-1 | RNA Pool-2 |
|------------------------------------|------------|------------|
| Number of RNAs                     | 305        | 306        |
| Mean pairwise identity (mPID)      | 33.38      | 33.72      |
| Consensus MFE                      | -7.88      | -8.06      |
| Structure conservation index (SCI) | 0.49       | 0.50       |
| Mean z-score                       | -1.07      | -1.04      |
| SVM RNA-class probability (P)      | 0.98       | 0.98       |

Fig S2. A) Consensus is drawn for all actinobacterial ANTAR-target RNA sequences using R2R and significantly covarying positions are mapped using R-scape. B) All the actinobacterial RNA hits were randomly divided into 2 pools (RNA Pool-1 and RNA Pool-2) and analyzed using RNAz. Parameters obtained from RNAz for each of the RNA pools are shown.

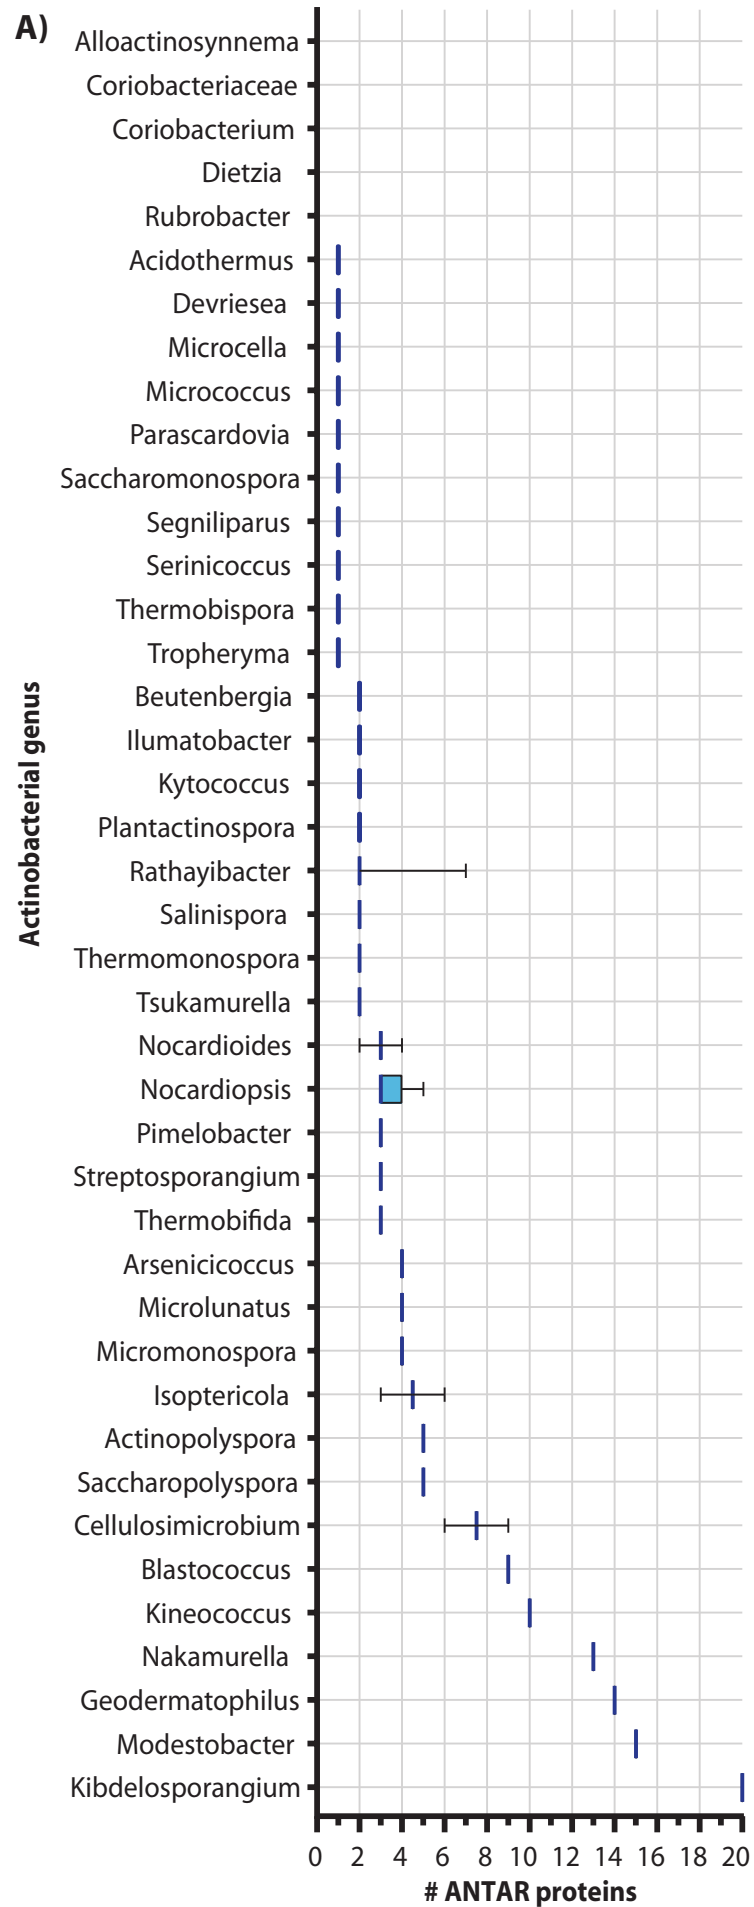

Fig S3. Distribution of ANTAR proteins in actinobacterial genera where ANTAR-target RNAs are not predicted. Box-Whisker plot with median (horizontal line), interquartile range (box) and 1.5 times the interquartile range (whiskers) is shown.

### A) *Corynebacterium sp. ATCC 6931*

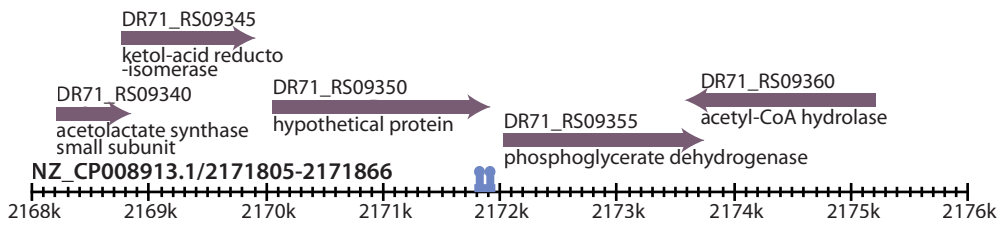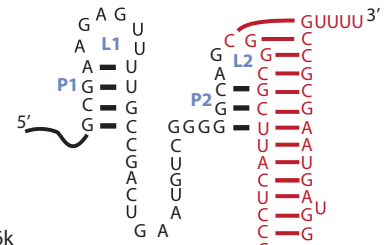

### *Frankia symbiont of Datisca glomerata*

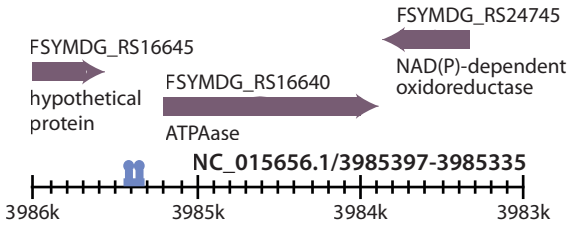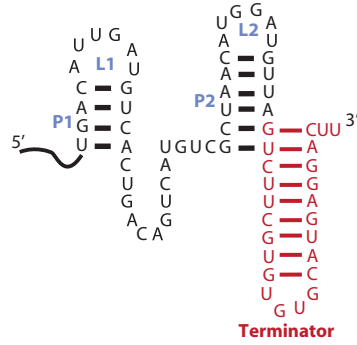

### *Corynebacterium terpenotabidum Y-11*

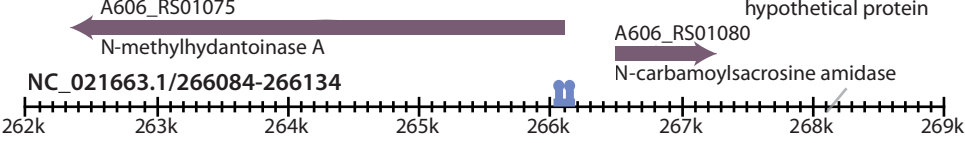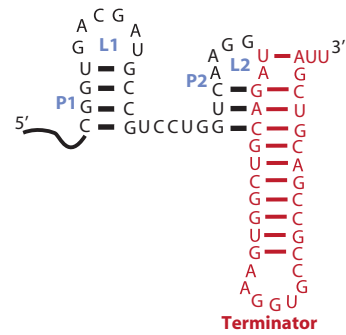

Fig S4: ANTAR-target RNAs categorized as 'intergenic' based on their location, were subjected to rho-independent transcription terminator analyses using TransTerm. Representative RNAs are shown with the predicted transcription terminator (red). The terminator structure is mutually exclusive from the dual stem ANTAR-target RNA structure.

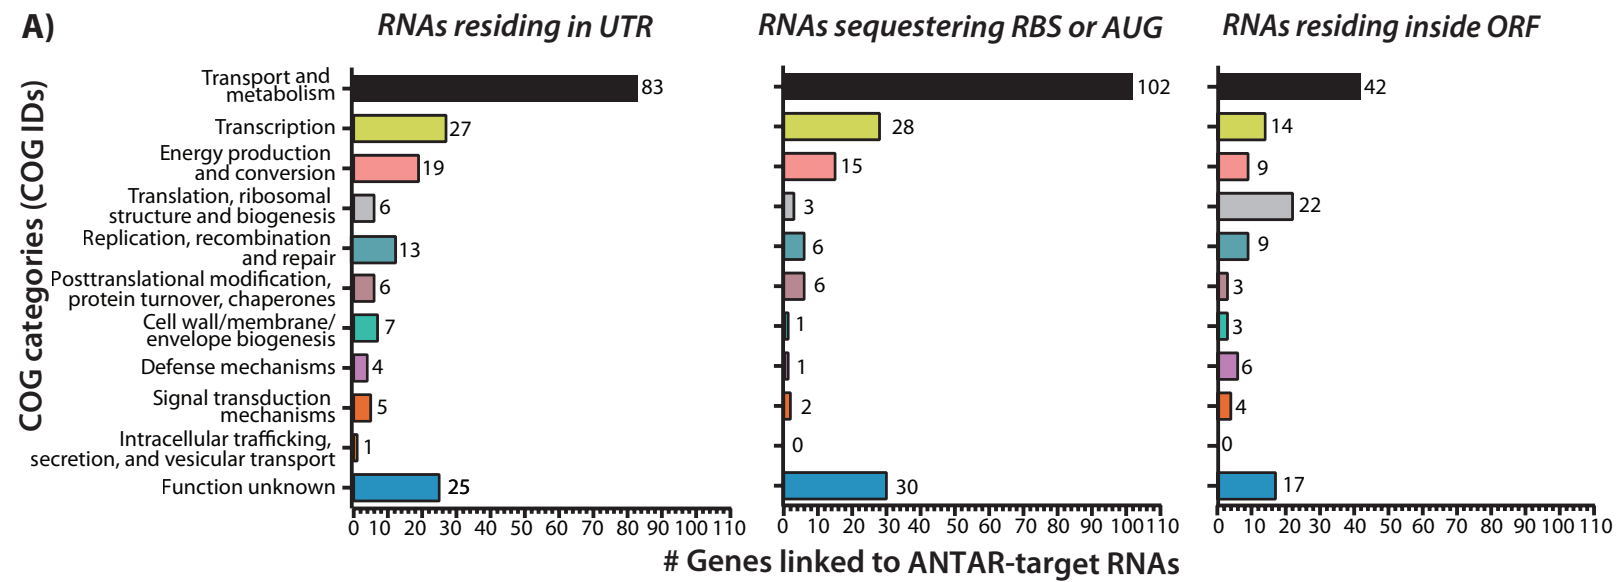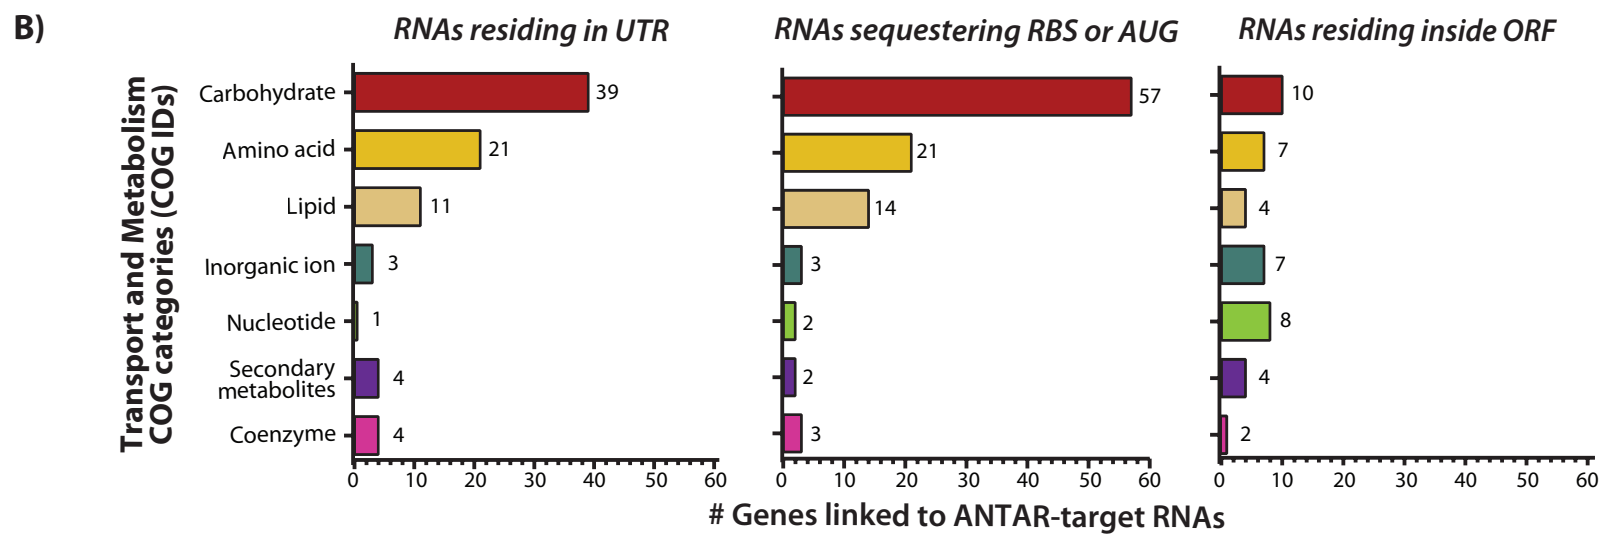

Fig S5. A) Genes linked to ANTAR-target RNAs grouped in UTR, sequester RBS or AUG, inside ORF categories, when analysed individually using EggNOG-mapper, get assigned to 11 COG categories. Bar plot shows distribution of genes linked to ANTAR-target RNAs, in each COG category. B) Bar plot shows distribution of genes linked to ANTAR-target RNAs, within the 'transport and metabolism' COG category. Carbohydrate and amino-acid transport and metabolism are the major processes represented by the targets.



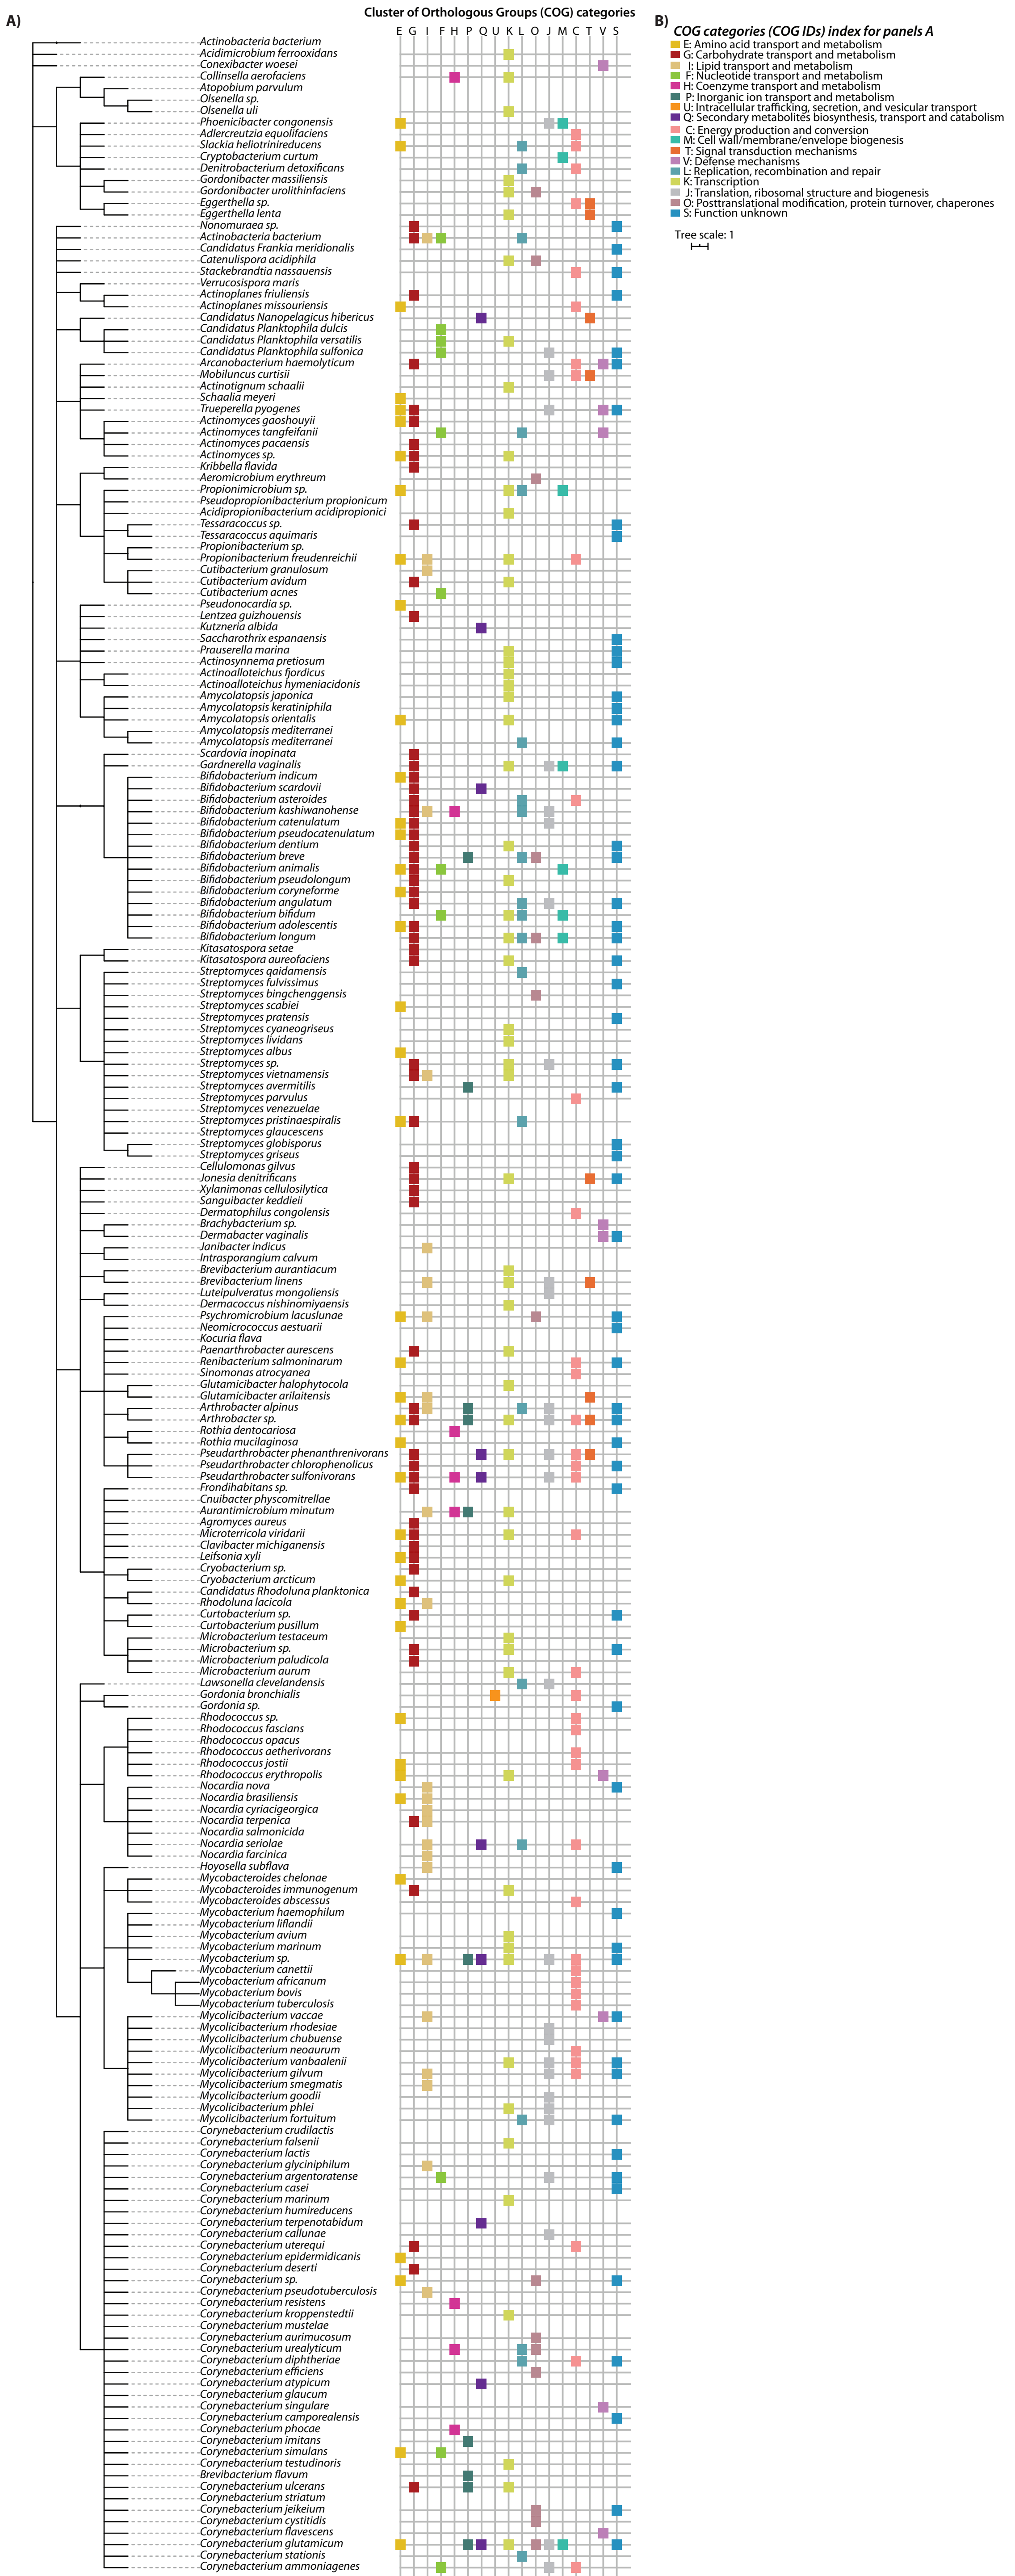

Fig S6. A) Phylogenetic tree obtained from the NCBI taxonomy of actinobacterial species is plotted using iTOL. COG categories of genes linked to ANTAR-target RNAs are plotted using iTOL-binary dataset type with the color notations and abbreviations given in panel B.

**A) Types of Transcription factors linked to ANTAR-target RNAs**

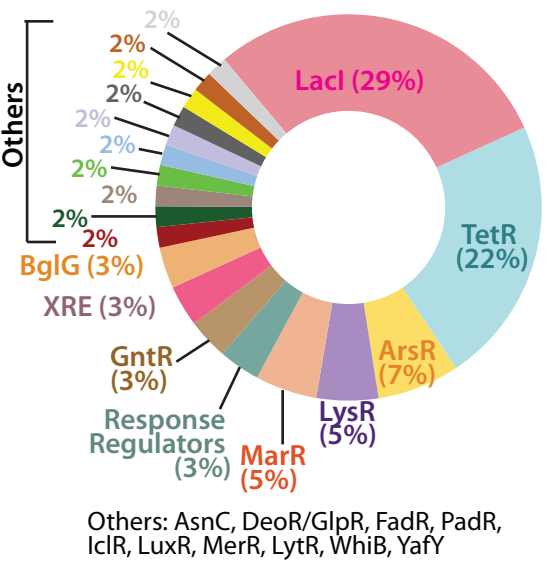

**B) *Streptomyces lydicus* A02**

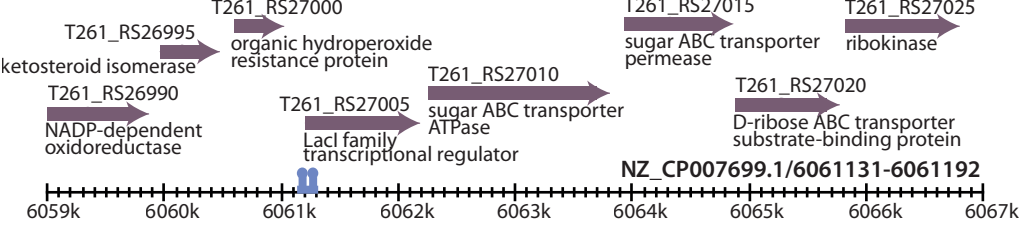

***Mycobacterium marinum* M**

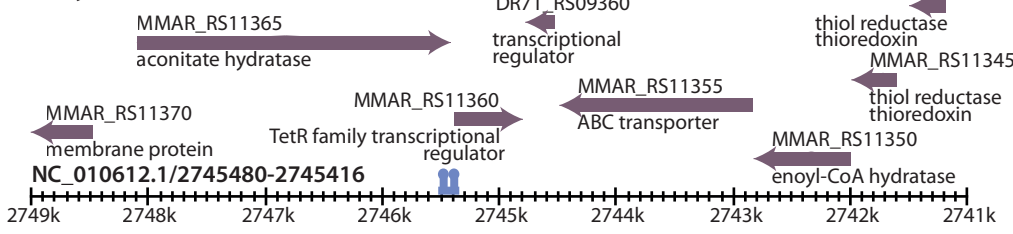

***Streptomyces sp. SirexAA-E***

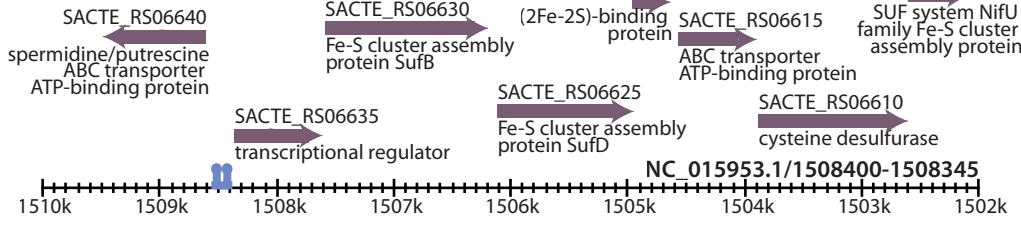

Fig S7. ANTAR-target RNAs linked to genes encoding transcription factors. A) Pie-chart shows the types of transcription factor families linked with ANTAR-target RNAs in actinobacteria. Many of the ANTAR-target RNAs are found upstream to Lacl and TetR family transcription factors. (B) Genomic contexts of ANTAR-target RNAs (blue) lying upstream of a transcription factor. ORFs (purple) are shown with their operonic arrangement and labeled with NCBI gene annotations.

Table S1: Diffused search model for ANTAR-target RNA dual stemloop motif.  
 30 representative RNAs from actinobacteria predicted using partially diffused search model are used to make the improvised search model (Diffused search model). Base paired nucleotides in stems are shaded in pink and blue and secondary structure of the RNA is shown in WUSS notation where '<' and '>' indicates base-pairing positions.

| Accession/Start-End                         | Sequence                                                                      |
|---------------------------------------------|-------------------------------------------------------------------------------|
| <a href="#">NC_019395/1187953-1188002</a>   | . AAAUACAGCuCAGUACUGU-. AUUG-..... UUAUCGGCAUGGACGCCAAUGACGAUG                |
| <a href="#">NC_022567/1325289-1325349</a>   | . AAAAAUUCUCUUGCAAUGAU.. GCAA CGGuc..... ggGUUAUCAUAGCAAAGCUGCUUGAGCGGAAG     |
| <a href="#">NZ_CP008953/3466226-3466279</a> | . AAAGUAACAGAUACAACGAC.. GUUAUC-..... CCUUAUCCAUGACGGUAUGCUCAGCGAAG           |
| <a href="#">NC_014218/792299-792362</a>     | . UGCGUGAUUUGCACGAUGAC.. GUGCUUUuau..... acgcAUCACUAUGUCAAAUGGAGACACUAGAAAAG  |
| <a href="#">NZ_CP013200/2964252-2964307</a> | . AUUUUUAAGCAUC-UAAUGGU.. GCGUAU.. AUGCACAUAUCAAAAGGAGAAUCAUGACAGA            |
| <a href="#">NC_013203/420130-420185</a>     | . UUCAUUUCUUACA AAAAGAC.. UUGUAG-..... AAGUGAUCUGCUUAUGAAGCAUAAAAUUUCA        |
| <a href="#">NZ_AP017457/676069-676125</a>   | . ACUUAUUAACA AAAAUGGA.. UUGUCGG..... CGGUUCCGGCAAUUUCGCCACUAGACUUU           |
| <a href="#">NZ_CP007443/1784660-1784721</a> | . AAAACGGCGACCGCAAAGCU.. GCGGUUGcc..... guaACAGAUACGGCAAUGGGGCCGGAAAACAG      |
| <a href="#">NZ_CP009244/915923-915974</a>   | . UAUAACCUAUGCGCAAAGAG.. GUUGU-..... CAGUAGCAAUGAAGCCGGUGCACAC                |
| <a href="#">NC_015738/2403432-2403484</a>   | . UCAAUUAUCC CAACAGUGAA.. GUUUGC-..... CAAAAAGGCAGCGAAGCUCAAACGGAA            |
| <a href="#">NZ_CP014513/1628135-1628207</a> | . UGACGCGCAUUAACAACGAU.. GUAAUAUGucgauggagcaccacCCUACGAAGCAAUGGAGCUCCAUGUCGAC |
| <a href="#">NC_013721/312045-312095</a>     | . AAGAUGAUUGCAGCGAAGAU.. GCUGA-..... CGAAAGCAAAGAUCCUGAUAGCAAAA               |
| <a href="#">NC_015564/4535773-4535832</a>   | . AAUGAACUAUCUACAACGAU.. GUAGAAUu..... ggUGAACUCAUGCAAAGGAGCAUGCGAUGCCA       |
| <a href="#">NZ_CP007155/7090364-7090418</a> | . AAAAUGCAUU CGUGAACGAA.. CACGAA-..... AAAUGAUCCGAAUGUAGCGGUUUUUGACA          |
| <a href="#">NZ_CP012390/604046-604102</a>   | . AGGUUCUCGACCGCAUUGGU.. GUGAUCG..... UUGGACAGGGCAACGAUGCCAUGAAGCACA          |
| <a href="#">NZ_CP014761/2225592-2225649</a> | . AUC AUGGUCU CUACAACGUU.. GUAGUAC..... aACGUUGUAGACAAAGGGUUCACACACCGCG       |
| <a href="#">NC_000962/2187261-2187311</a>   | . ACAAAUCCCAUGCAAAGAA.. GCAU-..... GUGUACAAACGAAGUAUCUUGGUAGU                 |
| <a href="#">NZ_CP016779/284217-284271</a>   | . GAAAUAAACUA AAUCAAUUC.. GGUUCC-..... AAUAAUUGGCAUUGGGCCCGGCAAUGAUU          |
| <a href="#">NZ_CP017717/9630535-9630594</a> | . GAUGCUCUGGCGGCGGUGAC.. GCCGACAc..... guCAUUAAAAGCAAUGGAGCCUGGAAAAUU         |
| <a href="#">NZ_CP016777/10943-11014</a>     | . AACAAUUCUUAACAAGGCU.. GUUGUCCacggcaa. aguauuuUUGUCUUCAGGCAAAGAGGCUUAUACUACG |
| <a href="#">NZ_CP018002/1543107-1543167</a> | . AUGAUUUCGCGCAACAUGGU.. GUUGUG-..... AAAAAAUGACGGAGCUCGGAGCGGAGCGCCCAA..     |
| <a href="#">NC_011886/676358-676423</a>     | . AUUUUCGCAACCGAAUGAC.. CUGGGUCCacga..... aagccGGAUUAUCAUGCAAGGGGAUCCAGCCAUG  |
| <a href="#">NZ_CP012182/279030-279077</a>   | . AUCGAAUUUGCCCCACGGGU.. GGGG-..... UAAGGCAAGGACGCCGCGGAGCAGA                 |
| <a href="#">NC_010168/1485495-1485548</a>   | . CAGCAAAGACCGCAAAGAG.. GGCGA-..... UUUUGUGGGCAAGGAAGCCUUGGCAAAGA             |
| <a href="#">NC_013521/337151-337201</a>     | . -----UUACAACGUU.. GUAAUGGgguu..... cccugaAAGGACACCGCAAUGAAGCGCAU-----       |
| <a href="#">NC_013165/1700444-1700501</a>   | . GUACGUGAAAAGAGAACGGU.. GCUUUUU..... gAAGGCAAGGAACAUGGUUGUUCUAUAAAAG         |
| <a href="#">NC_013947/4871519-4871574</a>   | . UUGAAUUGAGUCGCAAGGA.. GCGAAG-..... AUGUCUGUGGCAAGUUGCCAGUGCCGGU             |
| <a href="#">NC_016582/1325572-1325634</a>   | . ACAAUAAAACUACAAGGU.. GUUGUUUuau..... agcAUUGAGCAUGAAUCGGAUCAUCUGUGAAG       |
| <a href="#">NZ_CP019606/2506764-2506818</a> | . ACUCUGAUAAUGA-CAGCGGUGUAUU-..... UGGACGUAAGCAUGGGCCUUAUGUCUGAGG             |
| <a href="#">NZ_CP012649/324715-324777</a>   | . AAAAAGCCGUAGCCAAAGCU.. GUUUUUGcga..... aagGAAACAAGAACAAUGACGUUUUUGGUUAAAC   |
| RF                                          | . AaaAaaaauagcACAAAGGc.. GUgcUuu..... uauuaaAaAGCAAUGaAGCUcauaaaaaAaa         |
| SS_cons                                     | .....: <<<< _____ .>>>>-----<<< _____ >>>>: .....                             |



**Table S2:** ANTAR-target RNAs identified with diffused search model using Infernal v1.0.2 are shown for each organism given with the genome accession ID. Bit score is the value assigned by the covariance search to indicate similarity to the search model. A higher score suggests that the predicted RNA is more similar to the search model. RNAs with bit score threshold  $\geq 15.00$  are reported here. RNA co-ordinates are as predicted by Infernal. Genes in cis to the predicted RNA (gene linked to ANTAR-target RNA) is indicated as NCBI gene annotations and its corresponding distance from the RNAs.

| Organism<br>(Genome ID)                                                        | Bit<br>score | ANTAR-target RNA<br>co-ordinates | Strand | Annotation of the gene linked to<br>ANTAR-target RNAs<br>(Locus Tag) | Distance (nt) of RNA<br>from gene linked to<br>ANTAR-target RNA |
|--------------------------------------------------------------------------------|--------------|----------------------------------|--------|----------------------------------------------------------------------|-----------------------------------------------------------------|
| Brevibacterium flavum strain ATCC<br>15168 (NZ_CP011309.1)                     | 16.55        | 641856-641800                    | -1     | UDP-glucose 4-epimerase GalE<br>(YH66_RS03105)                       | 64                                                              |
|                                                                                | 15.4         | 2690553-2690500                  | -1     | phosphate ABC transporter, permease<br>protein PstA (YH66_RS12975)   | 5                                                               |
|                                                                                | 15.31        | 1296793-1296849                  | 1      | DEAD/DEAH box helicase<br>(YH66_RS06270)                             | 7                                                               |
|                                                                                | 15.24        | 1195547-1195604                  | 1      | MFS transporter (YH66_RS05805)                                       | 43                                                              |
| Brevibacterium flavum ZL-1<br>(NZ_CP004046.1)                                  | 15.4         | 2724657-2724605                  | -1     | phosphate ABC transporter, permease<br>protein PstA (C628_RS12840)   | 47                                                              |
|                                                                                | 15.31        | 1333526-1333582                  | 1      | ATP-dependent RNA helicase<br>(C628_RS06330)                         | 7                                                               |
|                                                                                | 15.24        | 1235481-1235538                  | 1      | MFS transporter (C628_RS05870)                                       | 43                                                              |
| Acidimicrobium ferrooxidans DSM<br>10331 (NC_013124.1)                         | 15.19        | 1724947-1725012                  | 1      | DNA-binding protein (AFER_RS08470)                                   | 42                                                              |
| Acidipropionibacterium acidipropionici<br>ATCC 4875 (NC_019395.1)              | 19.36        | 2388629-2388576                  | -1     | HTH domain-containing protein<br>(PACID_RS11080)                     | 19                                                              |
|                                                                                | 18.01        | 1188010-1187953                  | -1     | TetR family transcriptional regulator<br>(PACID_RS05275)             | 18                                                              |
| Acidipropionibacterium acidipropionici<br>strain ATCC 55737<br>(NZ_CP014352.1) | 19.36        | 963025-962972                    | -1     | transcriptional regulator<br>(AXH35_RS04620)                         | 19                                                              |
|                                                                                | 19.36        | 2384398-2384451                  | 1      | transcriptional regulator<br>(ASQ49_RS10630)                         | 19                                                              |

| Organism<br>(Genome ID)                                                                 | Bit<br>score | ANTAR-target RNA<br>co-ordinates | Strand | Annotation of the gene linked to<br>ANTAR-target RNAs<br>(Locus Tag) | Distance (nt) of RNA<br>from gene linked to<br>ANTAR-target RNA |
|-----------------------------------------------------------------------------------------|--------------|----------------------------------|--------|----------------------------------------------------------------------|-----------------------------------------------------------------|
|                                                                                         | 18.01        | 3485203-3485260                  | 1      | TetR family transcriptional regulator<br>(ASQ49_RS15825)             | 18                                                              |
| Acidipropionibacterium acidipropionici<br>strain F3E8 (NZ_CP015970.1)                   | 19.36        | 1261666-1261613                  | -1     | HTH domain-containing protein<br>(A8L58_RS06085)                     | 19                                                              |
|                                                                                         | 19.36        | 905699-905646                    | -1     | Fe-S cluster assembly protein SufB<br>(BW338_RS04285)                | 9                                                               |
|                                                                                         | 18.01        | 3442803-3442746                  | -1     | ABC transporter ATP-binding protein<br>(BW338_RS15680)               | 602                                                             |
| Actinoalloteichus hymeniacidonis<br>strain HPA177(T) (=DSM 45092(T))<br>(NZ_CP014859.1) | 15.43        | 4943167-4943111                  | -1     | YafY family transcriptional regulator<br>(TL08_RS20635)              | 254                                                             |
| Actinoalloteichus sp. ADI127-7<br>(NZ_CP016076.1)                                       | 15.27        | 5692023-5692090                  | 1      | LysR family transcriptional regulator<br>(UA74_RS24200)              | 17                                                              |
| Actinoalloteichus sp. GBA129-24<br>(NZ_CP016077.1)                                      | 15.27        | 5778466-5778533                  | 1      | LysR family transcriptional regulator<br>(UA75_RS24715)              | 17                                                              |
| Actinobacteria bacterium IMCC25003<br>(NZ_CP015603.1)                                   | 16.63        | 195172-195101                    | -1     | orotate phosphoribosyltransferase<br>(IMCC25003_RS00950)             | 25                                                              |
| Actinobacteria bacterium IMCC26077<br>(NZ_CP015606.1)                                   | 15.46        | 213250-213181                    | -1     | sugar ABC transporter ATP-binding<br>protein (IMCC26077_RS01135)     | 98                                                              |
| Actinobacteria bacterium IMCC26103<br>(NZ_CP015604.1)                                   | 15.22        | 718815-718864                    | 1      | hypothetical protein<br>(IMCC26103_RS03680)                          | 41                                                              |
| Actinobacteria bacterium IMCC26256<br>(NZ_CP011489.1)                                   | 18.1         | 1875820-1875760                  | -1     | hypothetical protein<br>(IMCC26256_RS08800)                          | 68                                                              |
|                                                                                         | 16.24        | 1614744-1614691                  | -1     | HNH endonuclease<br>(IMCC26256_RS07585)                              | 43                                                              |
|                                                                                         | 15.67        | 878644-878705                    | 1      | hypothetical protein<br>(IMCC26256_RS04175)                          | 86                                                              |
| Actinomyces gaoshouyii strain                                                           | 19.82        | 414788-414732                    | -1     | MFS transporter (B6G06_RS01630)                                      | 11                                                              |

| Organism<br>(Genome ID)                                                             | Bit<br>score | ANTAR-target RNA<br>co-ordinates | Strand | Annotation of the gene linked to<br>ANTAR-target RNAs<br>(Locus Tag)  | Distance (nt) of RNA<br>from gene linked to<br>ANTAR-target RNA |
|-------------------------------------------------------------------------------------|--------------|----------------------------------|--------|-----------------------------------------------------------------------|-----------------------------------------------------------------|
| pika_114 (NZ_CP020468.1)                                                            | 16.29        | 646951-647003                    | 1      | sugar ABC transporter substrate-binding protein (B6G06_RS02565)       | 14                                                              |
|                                                                                     | 15.63        | 2104690-2104738                  | 1      | serine/threonine protein kinase (B6G06_RS08790)                       | 17                                                              |
| Actinomyces meyeri strain W712 (NZ_CP012072.1)                                      | 17.3         | 276999-277055                    | 1      | glutamine synthetase (ADJ76_RS01245)                                  | 3                                                               |
| Actinomyces sp. Chiba101 DNA (NZ_AP017896.1)                                        | 16.32        | 593765-593708                    | -1     | MFS transporter (CHIBA101_RS02465)                                    | 10                                                              |
|                                                                                     | 15.67        | 773606-773660                    | 1      | 2-keto-myo-inositol dehydratase (CHIBA101_RS03265)                    | 4                                                               |
|                                                                                     | 15.63        | 313776-313728                    | -1     | serine/threonine protein kinase (CHIBA101_RS01290)                    | 17                                                              |
|                                                                                     | 15.25        | 2027467-2027415                  | -1     | sugar ABC transporter substrate-binding protein (CHIBA101_RS08425)    | 14                                                              |
| Actinomyces sp. Marseille-P2985 strain Marseille-P2985T contig00001 (NZ_LT635457.1) | 15.2         | 581940-581874                    | -1     | alpha-mannosidase (BQ7111_RS02600)                                    | 13                                                              |
| Actinomyces sp. oral taxon 414 strain F0588 (NZ_CP012590.1)                         | 24.28        | 627231-627295                    | 1      | LacI family transcriptional regulator (AM609_RS02480)                 | 91                                                              |
| Actinomyces sp. VUL4_3 (NZ_CP017812.1)                                              | 21.6         | 1397314-1397258                  | -1     | recombinase RecA (BK816_RS05805)                                      | 79                                                              |
|                                                                                     | 17.19        | 254992-255054                    | 1      | phosphoribosylformylglycinamide synthase subunit PurL (BK816_RS00900) | 477                                                             |
|                                                                                     | 15.89        | 2085482-2085428                  | -1     | hypothetical protein (BK816_RS08520)                                  | 83                                                              |
| Actinoplanes friuliensis DSM 7358 (NC_022657.1)                                     | 18.23        | 9254943-9254997                  | 1      | hypothetical protein (AFR_RS42690)                                    | 5                                                               |
|                                                                                     | 15.3         | 7354175-7354127                  | -1     | alpha-1,2-mannosidase (AFR_RS33845)                                   | 10                                                              |
| Actinoplanes missouriensis 431 DNA (NC_017093.1)                                    | 15.82        | 7097523-7097475                  | -1     | tryptophan 2,3-dioxygenase (AMIS_RS32425)                             | 6                                                               |
|                                                                                     | 15.42        | 7744888-7744823                  | -1     | electron transfer flavoprotein subunit beta                           | 19                                                              |

| Organism<br>(Genome ID)                                       | Bit<br>score | ANTAR-target RNA<br>co-ordinates | Strand | Annotation of the gene linked to<br>ANTAR-target RNAs<br>(Locus Tag) | Distance (nt) of RNA<br>from gene linked to<br>ANTAR-target RNA |
|---------------------------------------------------------------|--------------|----------------------------------|--------|----------------------------------------------------------------------|-----------------------------------------------------------------|
|                                                               |              |                                  |        | (AMIS_RS35245)                                                       |                                                                 |
| Actinoplanes sp. N902-109<br>(NC_021191.1)                    | 15.77        | 1672608-1672658                  | 1      | ribosome silencing factor<br>(L083_RS07555)                          | 53                                                              |
| Actinosynnema pretiosum strain X47<br>(NZ_CP023445.1)         | 20.39        | 4013130-4013182                  | 1      | LacI family transcriptional regulator<br>(CNX65_RS17145)             | 17                                                              |
|                                                               | 17.87        | 3895160-3895225                  | 1      | hypothetical protein (CNX65_RS16655)                                 | 2                                                               |
| Actinotignum schaalii strain CCUG<br>27420 (NZ_CP008802.1)    | 21.11        | 1251722-1251774                  | 1      | LacI family transcriptional regulator<br>(FB03_RS05325)              | 2                                                               |
|                                                               | 15.9         | 1434577-1434519                  | -1     | hypothetical protein (FB03_RS06045)                                  | 209                                                             |
|                                                               | 15.18        | 1274459-1274527                  | 1      | LuxR family transcriptional regulator<br>(FB03_RS05415)              | 356                                                             |
| Adlercreutzia equolifaciens DSM<br>19450 DNA (NC_022567.1)    | 32.04        | 1325349-1325289                  | -1     | tRNA-Pro (AEQU_RS05195)                                              | 15                                                              |
|                                                               | 18.26        | 1426207-1426157                  | -1     | 3-methyl-2-oxobutanoate dehydrogenase<br>subunit VorB (AEQU_RS05670) | 5                                                               |
| Aeromicrobium erythreum strain AR18<br>(NZ_CP011502.1)        | 15.47        | 3448673-3448731                  | 1      | NAD(P)/FAD-dependent oxidoreductase<br>(Aeryth_RS16260)              | 3                                                               |
| Agromyces aureus strain AR33<br>(NZ_CP013979.1)               | 16.26        | 3880103-3880043                  | -1     | hypothetical protein (ATC03_RS17315)                                 | 67                                                              |
| Amycolatopsis japonica strain<br>MG417-CF17 (NZ_CP008953.1)   | 23.53        | 3466279-3466226                  | -1     | TetR/AcrR family transcriptional regulator<br>(AJAP_RS16240)         | 12                                                              |
|                                                               | 16.49        | 1154197-1154251                  | 1      | hypothetical protein (AJAP_RS05720)                                  | 26                                                              |
| Amycolatopsis keratiniphila strain<br>HCCB10007 (NC_021252.1) | 15.72        | 7469565-7469511                  | -1     | DUF385 domain-containing protein<br>(AORI_RS74380)                   | 26                                                              |
|                                                               | 15.68        | 4847596-4847645                  | 1      | helix-turn-helix domain-containing protein<br>(AORI_RS63105)         | 120                                                             |
| Amycolatopsis mediterranei RB<br>(NC_022116.1)                | 16.07        | 9478426-9478370                  | -1     | gas vesicle protein (B737_RS43515)                                   | 37                                                              |

| Organism<br>(Genome ID)                                 | Bit<br>score | ANTAR-target RNA<br>co-ordinates | Strand | Annotation of the gene linked to<br>ANTAR-target RNAs<br>(Locus Tag)        | Distance (nt) of RNA<br>from gene linked to<br>ANTAR-target RNA |
|---------------------------------------------------------|--------------|----------------------------------|--------|-----------------------------------------------------------------------------|-----------------------------------------------------------------|
| Amycolatopsis mediterranei S699<br>(NC_017186.1)        | 16.23        | 6403001-6403057                  | 1      | IS110 family transposase<br>(RAM_RS48360)                                   | 213                                                             |
|                                                         | 16.07        | 9468570-9468514                  | -1     | gas vesicle protein (RAM_RS43460)                                           | 37                                                              |
|                                                         | 16.23        | 6412928-6412984                  | 1      | IS110 family transposase<br>(AMES_RS48400)                                  | 213                                                             |
|                                                         | 16.07        | 9478482-9478426                  | -1     | gas vesicle protein (AMES_RS43515)                                          | 37                                                              |
| Amycolatopsis mediterranei U32<br>(NC_014318.1)         | 16.07        | 9468510-9468454                  | -1     | gas vesicle protein GvpA (AMED_8633)                                        | 37                                                              |
| Amycolatopsis orientalis strain B-37<br>(NZ_CP016174.1) | 15.11        | 3249576-3249634                  | 1      | shikimate dehydrogenase<br>(SD37_RS14565)                                   | 36                                                              |
|                                                         | 15.02        | 7928691-7928746                  | 1      | tripartite tricarboxylate transporter TctB<br>family protein (SD37_RS34325) | 9                                                               |
| Arcanobacterium haemolyticum DSM<br>20595 (NC_014218.1) | 26.85        | 792299-792362                    | 1      | galactose/glucose-binding lipoprotein<br>(ARCH_RS03540)                     | 8                                                               |
|                                                         | 22.68        | 625569-625621                    | 1      | hexose-6-phosphate:phosphate antiporter<br>(ARCH_RS02785)                   | 1                                                               |
|                                                         | 19.77        | 40752-40799                      | 1      | exo-alpha-sialidase (ARCH_RS09165)                                          | 4                                                               |
|                                                         | 17.2         | 88902-88960                      | 1      | glycerophosphoryl diester<br>phosphodiesterase (ARCH_RS00310)               | 0                                                               |
|                                                         | 17.2         | 704515-704578                    | 1      | hypothetical protein (ARCH_RS03150)                                         | 36                                                              |
|                                                         | 16.57        | 123085-123135                    | 1      | ATP-binding protein (ARCH_RS00470)                                          | 2                                                               |
| Arsenicococcus sp. oral taxon 190<br>(NZ_CP012070.1)    | 15.63        | 2479486-2479551                  | 1      | 30S ribosomal protein S1<br>(ADJ73_RS11475)                                 | 91                                                              |
| Arthrobacter alpinus strain ERGS4:06<br>(NZ_CP013200.1) | 23.49        | 2964252-2964307                  | 1      | alpha/beta hydrolase (AS189_RS13165)                                        | 7                                                               |
|                                                         | 19.15        | 2477270-2477335                  | 1      | 30S ribosomal protein S1<br>(AS189_RS10870)                                 | 49                                                              |
|                                                         | 17.81        | 1608213-1608269                  | 1      | hypothetical protein (AS189_RS07130)                                        | 3                                                               |

| Organism<br>(Genome ID)                                    | Bit<br>score | ANTAR-target RNA<br>co-ordinates | Strand | Annotation of the gene linked to<br>ANTAR-target RNAs<br>(Locus Tag) | Distance (nt) of RNA<br>from gene linked to<br>ANTAR-target RNA |
|------------------------------------------------------------|--------------|----------------------------------|--------|----------------------------------------------------------------------|-----------------------------------------------------------------|
|                                                            | 15.34        | 3870920-3870873                  | -1     | DNA alkylation repair protein<br>(AS189_RS17180)                     | 239                                                             |
|                                                            | 15.31        | 1273631-1273692                  | 1      | heavy metal translocating P-type ATPase<br>(AS189_RS05655)           | 17                                                              |
|                                                            | 15.25        | 4027396-4027453                  | 1      | hypothetical protein (AS189_RS17870)                                 | 345                                                             |
|                                                            | 15.21        | 473061-473110                    | 1      | DUF3427 domain-containing protein<br>(AOC05_RS02030)                 | 5                                                               |
|                                                            | 15.1         | 125174-125110                    | -1     | ABC transporter substrate-binding protein<br>(AOC05_RS00465)         | 72                                                              |
| Arthrobacter arilaitensis RE117<br>(NC_014550.1)           | 20.23        | 976792-976738                    | -1     | acyl-CoA carboxylase subunit beta<br>(AARI_RS04880)                  | 351                                                             |
|                                                            | 15.82        | 3030192-3030140                  | -1     | amino acid decarboxylase<br>(AARI_RS14455)                           | 35                                                              |
| Arthrobacter sp. ATCC 21022<br>(NZ_CP014196.1)             | 18.98        | 506425-506490                    | 1      | hypothetical protein (AUT26_RS02425)                                 | 17                                                              |
|                                                            | 17.62        | 523749-523796                    | 1      | MFS transporter (AUT26_RS02490)                                      | 5                                                               |
|                                                            | 17.11        | 549492-549436                    | -1     | oxidoreductase (AUT26_RS02610)                                       | 80                                                              |
|                                                            | 16.98        | 2015651-2015589                  | -1     | sugar ABC transporter substrate-binding<br>protein (AUT26_RS09085)   | 3                                                               |
|                                                            | 16.04        | 2275221-2275286                  | 1      | 30S ribosomal protein S1<br>(AUT26_RS10230)                          | 94                                                              |
|                                                            | 15.76        | 4370883-4370828                  | -1     | AUT26_RS20010 (AUT26_RS20010)                                        | 47                                                              |
|                                                            | 15.14        | 3630293-3630349                  | 1      | hypothetical protein (AUT26_RS16410)                                 | 11                                                              |
| Arthrobacter sp. ERGS1:01 isolate<br>water (NZ_CP012479.1) | 17.89        | 1014978-1015039                  | 1      | hypothetical protein (AL755_RS08425)                                 | 2                                                               |
|                                                            | 15.86        | 386851-386793                    | -1     | DUF4245 domain-containing protein<br>(AL755_RS05765)                 | 209                                                             |
|                                                            | 15.38        | 3422948-3422884                  | -1     | universal stress protein (AL755_RS19430)                             | 25                                                              |



| Organism<br>(Genome ID)                                                        | Bit<br>score | ANTAR-target RNA<br>co-ordinates | Strand | Annotation of the gene linked to<br>ANTAR-target RNAs<br>(Locus Tag) | Distance (nt) of RNA<br>from gene linked to<br>ANTAR-target RNA |
|--------------------------------------------------------------------------------|--------------|----------------------------------|--------|----------------------------------------------------------------------|-----------------------------------------------------------------|
|                                                                                | 15.26        | 98837-98904                      | 1      | aldehyde dehydrogenase<br>(AL755_RS04450)                            | 107                                                             |
| Arthrobacter sp. ERGS1:01 isolate<br>water plasmid unnamed2<br>(NZ_CP012477.1) | 19.54        | 315774-315838                    | 1      | ABC transporter substrate-binding protein<br>(AL755_RS01495)         | 17                                                              |
|                                                                                | 16.68        | 285368-285421                    | 1      | ABC transporter ATP-binding protein<br>(AL755_RS01335)               | 31                                                              |
| Arthrobacter sp. FB24 plasmid 2<br>(NC_008538.1)                               | 18.43        | 84098-84153                      | 1      | ferredoxin (ARTH_RS22340)                                            | 17                                                              |
| Arthrobacter sp. FB24 (NC_008541.1)                                            | 24.08        | 399351-399411                    | 1      | hypothetical protein (ARTH_RS01920)                                  | 1                                                               |
|                                                                                | 23           | 3967947-3968005                  | 1      | gluconate kinase (ARTH_RS17885)                                      | 17                                                              |
|                                                                                | 15.34        | 2327690-2327755                  | 1      | 30S ribosomal protein S1<br>(ARTH_RS10440)                           | 94                                                              |
| Arthrobacter sp. IHBB 11108<br>(NZ_CP011005.1)                                 | 19.22        | 1447414-1447470                  | 1      | amino acid permease (UM93_RS06735)                                   | 280                                                             |
|                                                                                | 18.47        | 507759-507816                    | 1      | death-on-curing protein (UM93_RS02365)                               | 178                                                             |
|                                                                                | 16.97        | 2933785-2933728                  | -1     | hypothetical protein (UM93_RS13745)                                  | 25                                                              |
|                                                                                | 15.36        | 3142426-3142370                  | -1     | long-chain-fatty-acid--CoA ligase<br>(UM93_RS14870)                  | 5                                                               |
| Arthrobacter sp. LS16<br>(NZ_CP012171.1)                                       | 19.15        | 1710406-1710341                  | -1     | glyceraldehyde-3-phosphate<br>dehydrogenase (AFL94_RS07635)          | 50                                                              |
| Arthrobacter sp. QXT-31<br>(NZ_CP019304.1)                                     | 19.08        | 3170621-3170678                  | 1      | ABC transporter substrate-binding protein<br>(BWQ92_RS14325)         | 2                                                               |
|                                                                                | 18.85        | 4938603-4938520                  | -1     | AcrB/AcrD/AcrF family protein<br>(BWQ92_RS22540)                     | 19                                                              |
|                                                                                | 17.46        | 4972446-4972392                  | -1     | sugar ABC transporter substrate-binding<br>protein (BWQ92_RS22690)   | 66                                                              |
|                                                                                | 17.43        | 1250002-1250061                  | 1      | hypothetical protein (BWQ92_RS05620)                                 | 28                                                              |
|                                                                                | 15.41        | 2070139-2070197                  | 1      | gfo/Idh/MocA family oxidoreductase                                   | 44                                                              |

| Organism<br>(Genome ID)                    | Bit<br>score | ANTAR-target RNA<br>co-ordinates | Strand | Annotation of the gene linked to<br>ANTAR-target RNAs<br>(Locus Tag)  | Distance (nt) of RNA<br>from gene linked to<br>ANTAR-target RNA |
|--------------------------------------------|--------------|----------------------------------|--------|-----------------------------------------------------------------------|-----------------------------------------------------------------|
|                                            |              |                                  |        | (BWQ92_RS09390)                                                       |                                                                 |
| Arthrobacter sp. Rue61a<br>(NC_018531.1)   | 18.16        | 2363737-2363795                  | 1      | sugar ABC transporter substrate-binding<br>protein (ARUE_RS10720)     | 88                                                              |
|                                            | 17.57        | 648665-648604                    | -1     | MFS transporter (ARUE_RS03145)                                        | 83                                                              |
|                                            | 15.44        | 4204106-4204050                  | -1     | LacI family transcriptional regulator<br>(ARUE_RS19180)               | 420                                                             |
|                                            | 15.34        | 2452695-2452760                  | 1      | 30S ribosomal protein S1<br>(ARUE_RS11125)                            | 94                                                              |
| Arthrobacter sp. U41<br>(NZ_CP015732.1)    | 20.48        | 54483-54428                      | -1     | PLP-dependent transferase<br>(ASPU41_RS00255)                         | 4                                                               |
|                                            | 16.64        | 1628239-1628298                  | 1      | hypothetical protein (ASPU41_RS07570)                                 | 2                                                               |
|                                            | 15.96        | 3306175-3306228                  | 1      | LacI family DNA-binding transcriptional<br>regulator (ASPU41_RS15065) | 17                                                              |
|                                            | 15.85        | 1748515-1748566                  | 1      | acetone carboxylase subunit alpha<br>(ASPU41_RS08160)                 | 17                                                              |
|                                            | 15.54        | 3982498-3982554                  | 1      | hypothetical protein (ASPU41_RS18175)                                 | 48                                                              |
|                                            | 15.27        | 3740542-3740604                  | 1      | CsbD family protein (ASPU41_RS17020)                                  | 10                                                              |
| Arthrobacter sp. YC-RL1<br>(NZ_CP013297.1) | 19.15        | 2161698-2161633                  | -1     | glyceraldehyde-3-phosphate<br>dehydrogenase (ATC04_RS10120)           | 50                                                              |
| Arthrobacter sp. YN<br>(NZ_CP022436.1)     | 21.09        | 2248139-2248195                  | 1      | FAD-dependent oxidoreductase<br>(CGK93_RS10185)                       | 23                                                              |
|                                            | 15.96        | 1910566-1910516                  | -1     | sensor histidine kinase<br>(CGK93_RS08610)                            | 359                                                             |
|                                            | 15.88        | 4224508-4224564                  | 1      | hypothetical protein (CGK93_RS19300)                                  | 11                                                              |
|                                            | 15.34        | 2675478-2675543                  | 1      | 30S ribosomal protein S1<br>(CGK93_RS12080)                           | 94                                                              |
| Arthrobacter sp. ZXY-2                     | 17.62        | 3552929-3552882                  | -1     | MFS transporter (ARZXY2_RS16210)                                      | 5                                                               |

| Organism<br>(Genome ID)                                      | Bit<br>score | ANTAR-target RNA<br>co-ordinates | Strand | Annotation of the gene linked to<br>ANTAR-target RNAs<br>(Locus Tag) | Distance (nt) of RNA<br>from gene linked to<br>ANTAR-target RNA |
|--------------------------------------------------------------|--------------|----------------------------------|--------|----------------------------------------------------------------------|-----------------------------------------------------------------|
| (NZ_CP017421.1)                                              | 17.11        | 3527274-3527330                  | 1      | oxidoreductase (ARZXY2_RS16090)                                      | 80                                                              |
|                                                              | 16.04        | 1988906-1988841                  | -1     | 30S ribosomal protein S1<br>(ARZXY2_RS09175)                         | 94                                                              |
|                                                              | 15.76        | 4114296-4114351                  | 1      | MFS transporter (ARZXY2_RS18885)                                     | 8                                                               |
|                                                              | 15.75        | 304935-304879                    | -1     | hypothetical protein (ARZXY2_RS01460)                                | 11                                                              |
|                                                              | 15.05        | 3269070-3269014                  | -1     | DNA-binding response regulator<br>(ARZXY2_RS14910)                   | 64                                                              |
| Arthrobacter sp. ZXY-2 plasmid<br>pZXY21 (NZ_CP017422.1)     | 15.66        | 154094-154033                    | -1     | FAD-binding oxidoreductase<br>(ARZXY2_RS21385)                       | 2                                                               |
| Atopobium parvulum DSM 20469<br>(NC_013203.1)                | 19.43        | 420185-420130                    | -1     | hypothetical protein (APAR_RS01890)                                  | 17                                                              |
|                                                              | 16.32        | 432964-433017                    | 1      | hypothetical protein (APAR_RS01945)                                  | 26                                                              |
| Aurantimicrobium minutum DNA,<br>strain: KNC (NZ_AP017457.1) | 19.38        | 676125-676069                    | -1     | hypothetical protein (AUMI_RS03320)                                  | 28                                                              |
|                                                              | 16.5         | 1187659-1187715                  | 1      | NINE protein (AUMI_RS05890)                                          | 64                                                              |
|                                                              | 16.44        | 1240808-1240861                  | 1      | type I pantothenate kinase<br>(AUMI_RS06085)                         | 330                                                             |
|                                                              | 15.75        | 521488-521549                    | 1      | ammonium transporter (AUMI_RS02580)                                  | 2                                                               |
|                                                              | 15.3         | 749840-749893                    | 1      | propionyl-CoA synthetase<br>(AUMI_RS03660)                           | 2                                                               |
| Bifidobacterium adolescentis ATCC<br>15703 DNA (NC_008618.1) | 21.38        | 1609525-1609471                  | -1     | sugar ABC transporter permease<br>(BAD_RS06830)                      | 5                                                               |
|                                                              | 16.01        | 534675-534736                    | 1      | sugar ABC transporter substrate-binding<br>protein (BAD_RS02255)     | 38                                                              |
|                                                              | 15.16        | 1278132-1278189                  | 1      | mannan endo-1,4-beta-mannosidase<br>(BAD_RS05480)                    | 4                                                               |
| Bifidobacterium adolescentis strain<br>22L (NZ_CP007443.1)   | 27.95        | 1784660-1784721                  | 1      | HAD family hydrolase (BADO_RS07460)                                  | 48                                                              |
|                                                              | 21.86        | 2169133-2169079                  | -1     | ABC transporter substrate-binding protein                            | 5                                                               |

| Organism<br>(Genome ID)                                                  | Bit<br>score | ANTAR-target RNA<br>co-ordinates | Strand | Annotation of the gene linked to<br>ANTAR-target RNAs<br>(Locus Tag) | Distance (nt) of RNA<br>from gene linked to<br>ANTAR-target RNA |
|--------------------------------------------------------------------------|--------------|----------------------------------|--------|----------------------------------------------------------------------|-----------------------------------------------------------------|
|                                                                          |              |                                  |        | (BADO_RS08855)                                                       |                                                                 |
|                                                                          | 16.14        | 542863-542924                    | 1      | sugar ABC transporter substrate-binding protein (BADO_RS02270)       | 38                                                              |
|                                                                          | 15.88        | 217067-217115                    | 1      | hypothetical protein (BADO_RS00830)                                  | 71                                                              |
| Bifidobacterium adolescentis strain<br>BBMN23 (NZ_CP010437.1)            | 25.23        | 2041274-2041213                  | -1     | HAD family hydrolase (BBMN23_RS08555)                                | 14                                                              |
|                                                                          | 17.56        | 431761-431813                    | 1      | MFS transporter (BBMN23_RS01715)                                     | 13                                                              |
|                                                                          | 17.47        | 550782-550840                    | 1      | sugar ABC transporter substrate-binding protein (BBMN23_RS02285)     | 38                                                              |
|                                                                          | 15.88        | 227134-227182                    | 1      | hypothetical protein (BBMN23_RS00850)                                | 71                                                              |
| Bifidobacterium angulatum DSM<br>20098 = JCM 7096 DNA<br>(NZ_AP012322.1) | 20.47        | 1863117-1863064                  | -1     | DUF2142 domain-containing protein (BBAG_RS07490)                     | 17                                                              |
|                                                                          | 20           | 787294-787346                    | 1      | recombinase RecA (BBAG_RS03180)                                      | 40                                                              |
|                                                                          | 16.36        | 1197777-1197844                  | 1      | YraN family protein (BBAG_RS04860)                                   | 132                                                             |
|                                                                          | 16.14        | 439087-439148                    | 1      | sugar ABC transporter substrate-binding protein (BBAG_RS01745)       | 38                                                              |
|                                                                          | 15.61        | 854184-854242                    | 1      | D-tyrosyl-tRNA(Tyr) deacylase (BBAG_RS03410)                         | 147                                                             |
|                                                                          | 15.37        | 606590-606650                    | 1      | ABC transporter substrate-binding protein (BBAG_RS02440)             | 17                                                              |
|                                                                          | 15.15        | 565546-565592                    | 1      | sugar ABC transporter permease (BBAG_RS02280)                        | 17                                                              |
| Bifidobacterium angulatum strain<br>GT102 (NZ_CP014241.1)                | 20           | 1353009-1353061                  | 1      | recombinase RecA (Bang102_RS05340)                                   | 40                                                              |
|                                                                          | 16.14        | 951500-951561                    | 1      | sugar ABC transporter substrate-binding protein (Bang102_RS03735)    | 38                                                              |
|                                                                          | 15.59        | 1152771-1152827                  | 1      | MFS transporter (Bang102_RS04535)                                    | 93                                                              |

| Organism<br>(Genome ID)                                              | Bit<br>score | ANTAR-target RNA<br>co-ordinates | Strand | Annotation of the gene linked to<br>ANTAR-target RNAs<br>(Locus Tag)                   | Distance (nt) of RNA<br>from gene linked to<br>ANTAR-target RNA |
|----------------------------------------------------------------------|--------------|----------------------------------|--------|----------------------------------------------------------------------------------------|-----------------------------------------------------------------|
|                                                                      | 15.15        | 1122454-1122500                  | 1      | sugar ABC transporter permease<br>(Bang102_RS04410)                                    | 17                                                              |
| Bifidobacterium animalis strain A6<br>(NZ_CP010433.1)                | 17.58        | 1704615-1704565                  | -1     | mannan endo-1,4-beta-mannosidase<br>(BAA6_RS07205)                                     | 12                                                              |
|                                                                      | 17.28        | 1662665-1662716                  | 1      | hypothetical protein (BAA6_RS07010)                                                    | 1                                                               |
|                                                                      | 16.16        | 357064-357123                    | 1      | mannose-1-phosphate<br>guanylyltransferase (BAA6_RS01455)                              | 176                                                             |
|                                                                      | 16.16        | 357063-357123                    | 1      | mannose-1-phosphate<br>guanylyltransferase (BAA6_RS01455)                              | 176                                                             |
| Bifidobacterium animalis strain BL3<br>(NZ_CP017098.1)               | 17.58        | 1704823-1704773                  | -1     | mannan endo-1,4-beta-mannosidase<br>(BGL50_RS07385)                                    | 12                                                              |
|                                                                      | 17.28        | 1662873-1662924                  | 1      | hypothetical protein (BGL50_RS07190)                                                   | 1                                                               |
|                                                                      | 16.16        | 357118-357177                    | 1      | mannose-1-phosphate<br>guanylyltransferase (BGL50_RS01545)                             | 176                                                             |
| Bifidobacterium animalis strain RH<br>(NZ_CP007755.1)                | 17.58        | 1693954-1693904                  | -1     | mannan endo-1,4-beta-mannosidase<br>(EN10_RS07170)                                     | 12                                                              |
|                                                                      | 17.28        | 1652004-1652055                  | 1      | hypothetical protein (EN10_RS06975)                                                    | 1                                                               |
|                                                                      | 16.16        | 357421-357480                    | 1      | mannose-1-phosphate<br>guanylyltransferase (EN10_RS01455)                              | 176                                                             |
| Bifidobacterium animalis subsp.<br>animalis ATCC 25527 (NC_017834.1) | 17.61        | 1905476-1905417                  | -1     | sn-glycerol-3-phosphate ABC transporter<br>ATP-binding protein UgpC<br>(BANAN_RS07810) | 77                                                              |
|                                                                      | 16.47        | 363482-363548                    | 1      | mannose-1-phosphate<br>guanylyltransferase (BANAN_RS01505)                             | 176                                                             |
|                                                                      | 16.18        | 573407-573353                    | -1     | hypothetical protein (BANAN_RS08175)                                                   | 89                                                              |
|                                                                      | 16.07        | 1890249-1890201                  | -1     | alpha-galactosidase (BANAN_RS07760)                                                    | 7                                                               |
|                                                                      | 15.35        | 1206973-1206922                  | -1     | hypothetical protein (BANAN_RS08255)                                                   | 228                                                             |

| Organism<br>(Genome ID)                                                | Bit<br>score | ANTAR-target RNA<br>co-ordinates | Strand | Annotation of the gene linked to<br>ANTAR-target RNAs<br>(Locus Tag)                   | Distance (nt) of RNA<br>from gene linked to<br>ANTAR-target RNA |
|------------------------------------------------------------------------|--------------|----------------------------------|--------|----------------------------------------------------------------------------------------|-----------------------------------------------------------------|
| Bifidobacterium animalis subsp.<br>animalis strain YL2 (NZ_CP015407.2) | 18.25        | 352928-352862                    | -1     | mannose-1-phosphate<br>guanylyltransferase (A4U98_RS01585)                             | 176                                                             |
|                                                                        | 17.61        | 750467-750526                    | 1      | sn-glycerol-3-phosphate ABC transporter<br>ATP-binding protein UgpC<br>(A4U98_RS03285) | 77                                                              |
|                                                                        | 17.28        | 1036659-1036608                  | -1     | hypothetical protein (A4U98_RS04475)                                                   | 1                                                               |
|                                                                        | 16.18        | 148239-148293                    | 1      | hypothetical protein (A4U98_RS00670)                                                   | 89                                                              |
|                                                                        | 16.07        | 765693-765741                    | 1      | alpha-galactosidase (A4U98_RS03340)                                                    | 7                                                               |
|                                                                        | 16.07        | 894076-894146                    | 1      | nucleoside hydrolase (A4U98_RS03835)                                                   | 6                                                               |
|                                                                        | 15.35        | 1538414-1538465                  | 1      | hypothetical protein (A4U98_RS06450)                                                   | 228                                                             |
| Bifidobacterium animalis subsp. lactis<br>AD011 (NC_011835.1)          | 17.58        | 830093-830043                    | -1     | mannan endo-1,4-beta-mannosidase<br>(BLA_RS03390)                                      | 12                                                              |
|                                                                        | 17.28        | 788300-788351                    | 1      | hypothetical protein (BLA_RS03195)                                                     | 1                                                               |
|                                                                        | 16.16        | 356849-356908                    | 1      | mannose-1-phosphate<br>guanylyltransferase (BLA_RS01455)                               | 176                                                             |
| Bifidobacterium animalis subsp. lactis<br>ATCC 27673 (NC_022523.1)     | 18.72        | 1727752-1727699                  | -1     | secreted beta-mannosidase<br>(BLAC_RS07285)                                            | 30                                                              |
|                                                                        | 17.28        | 1678573-1678624                  | 1      | hypothetical protein (BLAC_RS07090)                                                    | 1                                                               |
|                                                                        | 16.16        | 357221-357280                    | 1      | mannose-1-phosphate<br>guanylyltransferase (BLAC_RS01485)                              | 176                                                             |
| Bifidobacterium animalis subsp. lactis<br>B420 (NC_017866.1)           | 17.58        | 1699160-1699110                  | -1     | mannan endo-1,4-beta-mannosidase<br>(W7Y_RS07195)                                      | 12                                                              |
|                                                                        | 17.28        | 1657210-1657261                  | 1      | hypothetical protein (W7Y_RS07000)                                                     | 1                                                               |
|                                                                        | 16.16        | 357061-357120                    | 1      | mannose-1-phosphate<br>guanylyltransferase (W7Y_RS01460)                               | 176                                                             |
| Bifidobacterium animalis subsp. lactis<br>BB-12 (NC_017214.1)          | 17.58        | 396461-396411                    | -1     | mannan endo-1,4-beta-mannosidase<br>(BIF_RS01600)                                      | 12                                                              |



| Organism<br>(Genome ID)                                             | Bit<br>score | ANTAR-target RNA<br>co-ordinates | Strand | Annotation of the gene linked to<br>ANTAR-target RNAs<br>(Locus Tag) | Distance (nt) of RNA<br>from gene linked to<br>ANTAR-target RNA |
|---------------------------------------------------------------------|--------------|----------------------------------|--------|----------------------------------------------------------------------|-----------------------------------------------------------------|
|                                                                     | 17.28        | 354579-354630                    | 1      | hypothetical protein (BIF_RS01405)                                   | 1                                                               |
|                                                                     | 16.16        | 992545-992604                    | 1      | mannose-1-phosphate<br>guanylyltransferase (BIF_RS03905)             | 176                                                             |
| Bifidobacterium animalis subsp. lactis<br>Bi-07 (NC_017867.1)       | 17.58        | 1699379-1699329                  | -1     | mannan endo-1,4-beta-mannosidase<br>(W91_RS07185)                    | 12                                                              |
|                                                                     | 17.28        | 1657429-1657480                  | 1      | hypothetical protein (W91_RS06990)                                   | 1                                                               |
|                                                                     | 16.16        | 357063-357122                    | 1      | mannose-1-phosphate<br>guanylyltransferase (W91_RS01455)             | 176                                                             |
| Bifidobacterium animalis subsp. lactis<br>BI-04 (NC_012814.1)       | 17.58        | 1699324-1699274                  | -1     | mannan endo-1,4-beta-mannosidase<br>(BALAC_RS07185)                  | 12                                                              |
|                                                                     | 17.28        | 1657373-1657424                  | 1      | hypothetical protein (BALAC_RS06990)                                 | 1                                                               |
|                                                                     | 16.16        | 357062-357121                    | 1      | mannose-1-phosphate<br>guanylyltransferase (BALAC_RS01455)           | 176                                                             |
| Bifidobacterium animalis subsp. lactis<br>BI12 (NC_021593.1)        | 17.58        | 1698948-1698898                  | -1     | mannan endo-1,4-beta-mannosidase<br>(BL12_RS07185)                   | 12                                                              |
|                                                                     | 17.28        | 1656999-1657050                  | 1      | hypothetical protein (BL12_RS06990)                                  | 1                                                               |
|                                                                     | 16.16        | 356921-356980                    | 1      | mannose-1-phosphate<br>guanylyltransferase (BL12_RS01455)            | 176                                                             |
| Bifidobacterium animalis subsp. lactis<br>BLC1 (NC_017216.2)        | 17.58        | 1698969-1698919                  | -1     | mannan endo-1,4-beta-mannosidase<br>(BLC1_RS07185)                   | 12                                                              |
|                                                                     | 17.28        | 1657019-1657070                  | 1      | hypothetical protein (BLC1_RS06990)                                  | 1                                                               |
|                                                                     | 16.16        | 356927-356986                    | 1      | mannose-1-phosphate<br>guanylyltransferase (BLC1_RS01455)            | 176                                                             |
| Bifidobacterium animalis subsp. lactis<br>CNCM I-2494 (NC_017215.1) | 17.58        | 1703911-1703861                  | -1     | mannan endo-1,4-beta-mannosidase<br>(BALAC2494_RS07200)              | 12                                                              |
|                                                                     | 17.28        | 1661994-1662045                  | 1      | hypothetical protein<br>(BALAC2494_RS07005)                          | 1                                                               |

| Organism<br>(Genome ID)                                                | Bit<br>score | ANTAR-target RNA<br>co-ordinates | Strand | Annotation of the gene linked to<br>ANTAR-target RNAs<br>(Locus Tag) | Distance (nt) of RNA<br>from gene linked to<br>ANTAR-target RNA |
|------------------------------------------------------------------------|--------------|----------------------------------|--------|----------------------------------------------------------------------|-----------------------------------------------------------------|
|                                                                        | 16.16        | 357074-357133                    | 1      | mannose-1-phosphate<br>guanylyltransferase<br>(BALAC2494_RS01455)    | 176                                                             |
| Bifidobacterium animalis subsp. lactis<br>DSM 10140 (NC_012815.1)      | 17.58        | 1699041-1698991                  | -1     | mannan endo-1,4-beta-mannosidase<br>(BALAT_RS07180)                  | 12                                                              |
|                                                                        | 17.28        | 1657091-1657142                  | 1      | hypothetical protein (BALAT_RS06985)                                 | 1                                                               |
|                                                                        | 16.16        | 357063-357122                    | 1      | mannose-1-phosphate<br>guanylyltransferase (BALAT_RS01455)           | 176                                                             |
| Bifidobacterium animalis subsp. lactis<br>KLDS2.0603 (NZ_CP007522.1)   | 17.58        | 1698786-1698736                  | -1     | mannan endo-1,4-beta-mannosidase<br>(U723_RS07185)                   | 12                                                              |
|                                                                        | 17.28        | 1656836-1656887                  | 1      | hypothetical protein (U723_RS06990)                                  | 1                                                               |
|                                                                        | 16.16        | 356896-356955                    | 1      | mannose-1-phosphate<br>guanylyltransferase (U723_RS01450)            | 176                                                             |
| Bifidobacterium animalis subsp. lactis<br>strain BF052 (NZ_CP009045.1) | 17.58        | 1698958-1698908                  | -1     | mannan endo-1,4-beta-mannosidase<br>(GU89_RS07185)                   | 12                                                              |
|                                                                        | 17.28        | 1657008-1657059                  | 1      | hypothetical protein (GU89_RS06990)                                  | 1                                                               |
|                                                                        | 16.16        | 356897-356956                    | 1      | mannose-1-phosphate<br>guanylyltransferase (GU89_RS01450)            | 176                                                             |
| Bifidobacterium animalis subsp. lactis<br>V9 (NC_017217.1)             | 17.58        | 1704610-1704560                  | -1     | mannan endo-1,4-beta-mannosidase<br>(BALV_RS07195)                   | 12                                                              |
|                                                                        | 17.28        | 1662660-1662711                  | 1      | hypothetical protein (BALV_RS07000)                                  | 1                                                               |
|                                                                        | 16.16        | 357064-357123                    | 1      | mannose-1-phosphate<br>guanylyltransferase (BALV_RS01455)            | 176                                                             |
|                                                                        | 16.16        | 357063-357123                    | 1      | mannose-1-phosphate<br>guanylyltransferase (BAA6_RS01455)            | 176                                                             |
| Bifidobacterium asteroides PRL2011<br>(NC_018720.1)                    | 18.66        | 1405400-1405348                  | -1     | MFS transporter (BAST_RS05485)                                       | 9                                                               |
|                                                                        | 16.49        | 389675-389732                    | 1      | NAD(P)/FAD-dependent oxidoreductase                                  | 79                                                              |

| Organism<br>(Genome ID)                                                             | Bit<br>score | ANTAR-target RNA<br>co-ordinates | Strand | Annotation of the gene linked to<br>ANTAR-target RNAs<br>(Locus Tag)            | Distance (nt) of RNA<br>from gene linked to<br>ANTAR-target RNA |
|-------------------------------------------------------------------------------------|--------------|----------------------------------|--------|---------------------------------------------------------------------------------|-----------------------------------------------------------------|
|                                                                                     |              |                                  |        | (BAST_RS01530)                                                                  |                                                                 |
|                                                                                     | 15.55        | 2013830-2013775                  | -1     | type II toxin-antitoxin system antitoxin,<br>RelB/DinJ family (BAST_RS08055)    | 62                                                              |
| Bifidobacterium asteroides strain DSM<br>20089 (NZ_CP017696.1)                      | 18.66        | 1186153-1186101                  | -1     | MFS transporter (BA20089_RS04650)                                               | 87                                                              |
|                                                                                     | 16.49        | 170394-170451                    | 1      | NAD(P)/FAD-dependent oxidoreductase<br>(BA20089_RS00705)                        | 79                                                              |
|                                                                                     | 15.55        | 1794587-1794532                  | -1     | type II toxin-antitoxin system antitoxin,<br>RelB/DinJ family (BA20089_RS07265) | 62                                                              |
| Bifidobacterium bifidum ATCC 29521<br>= JCM 1255 = DSM 20456 DNA<br>(NZ_AP012323.1) | 18.3         | 63952-63901                      | -1     | IS256 family transposase<br>(BBBF_RS00250)                                      | 27                                                              |
|                                                                                     | 17.02        | 1140470-1140529                  | 1      | PadR family transcriptional regulator<br>(BBBF_RS04740)                         | 103                                                             |
|                                                                                     | 16.89        | 686128-686184                    | 1      | LysM peptidoglycan-binding domain-<br>containing protein (BBBF_RS02700)         | 105                                                             |
|                                                                                     | 16.42        | 1744975-1744913                  | -1     | thymidylate synthase (BBBF_RS07360)                                             | 102                                                             |
| Bifidobacterium bifidum BGN4<br>(NC_017999.1)                                       | 18.45        | 647226-647282                    | 1      | LysM peptidoglycan-binding domain-<br>containing protein (BBB_RS02605)          | 105                                                             |
|                                                                                     | 17.02        | 1082856-1082915                  | 1      | PadR family transcriptional regulator<br>(BBB_RS04385)                          | 103                                                             |
|                                                                                     | 16.42        | 1733401-1733339                  | -1     | thymidylate synthase (BBB_RS07205)                                              | 102                                                             |
| Bifidobacterium bifidum PRL2010<br>(NC_014638.1)                                    | 17.02        | 1134880-1134939                  | 1      | family transcriptional regulator PadR<br>(BBPR_0951)                            | 103                                                             |
|                                                                                     | 16.89        | 681907-681963                    | 1      | hypothetical protein (BBPR_0543)                                                | 105                                                             |
|                                                                                     | 16.42        | 1740876-1740814                  | -1     | thymidylate synthase (BBPR_1477)                                                | 102                                                             |
| Bifidobacterium bifidum S17<br>(NC_014616.1)                                        | 18.3         | 480016-480067                    | 1      | IS256 family transposase<br>(BBIF_RS02050)                                      | 27                                                              |
|                                                                                     | 17.02        | 1104648-1104707                  | 1      | PadR family transcriptional regulator                                           | 103                                                             |

| Organism<br>(Genome ID)                                 | Bit<br>score | ANTAR-target RNA<br>co-ordinates | Strand | Annotation of the gene linked to<br>ANTAR-target RNAs<br>(Locus Tag)    | Distance (nt) of RNA<br>from gene linked to<br>ANTAR-target RNA |
|---------------------------------------------------------|--------------|----------------------------------|--------|-------------------------------------------------------------------------|-----------------------------------------------------------------|
|                                                         |              |                                  |        | (BBIF_RS04590)                                                          |                                                                 |
|                                                         | 16.42        | 1713278-1713216                  | -1     | thymidylate synthase (BBIF_RS07240)                                     | 102                                                             |
| Bifidobacterium bifidum strain BF3<br>(NZ_CP010412.1)   | 17.02        | 1159989-1160048                  | 1      | PadR family transcriptional regulator<br>(RY70_RS04590)                 | 103                                                             |
|                                                         | 16.42        | 1806969-1806907                  | -1     | thymidylate synthase (RY70_RS07425)                                     | 102                                                             |
|                                                         | 15.09        | 732893-732949                    | 1      | LysM peptidoglycan-binding domain-<br>containing protein (RY70_RS02830) | 105                                                             |
| Bifidobacterium breve 12L<br>(NZ_CP006711.1)            | 20.6         | 1516065-1516101                  | 1      | serpin family protein (B12L_RS06350)                                    | 31                                                              |
|                                                         | 17.59        | 775796-775729                    | -1     | Txe/YoeB family addiction module toxin<br>(B12L_RS03070)                | 59                                                              |
|                                                         | 16.26        | 1347579-1347527                  | -1     | recombinase RecA (B12L_RS05660)                                         | 55                                                              |
| Bifidobacterium breve 689b<br>(NZ_CP006715.1)           | 20.83        | 665275-665329                    | 1      | hypothetical protein (B689B_RS02670)                                    | 8                                                               |
|                                                         | 20.6         | 1592334-1592390                  | 1      | serpin family protein (B689B_RS06770)                                   | 41                                                              |
|                                                         | 17.59        | 872602-872535                    | -1     | Txe/YoeB family addiction module toxin<br>(B689B_RS03565)               | 59                                                              |
|                                                         | 17.2         | 602556-602495                    | -1     | ATPase AAA (B689B_RS02450)                                              | 1066                                                            |
|                                                         | 16.38        | 258222-258273                    | 1      | IS3 family transposase (B689B_RS00960)                                  | 183                                                             |
|                                                         | 16.26        | 1421977-1421925                  | -1     | recombinase RecA (B689B_RS06075)                                        | 55                                                              |
| Bifidobacterium breve ACS-071-V-<br>Sch8b (NC_017218.1) | 20.6         | 652555-652499                    | -1     | serpin family protein<br>(HMPREF9228_RS02650)                           | 5                                                               |
|                                                         | 17.59        | 1334083-1334150                  | 1      | Txe/YoeB family addiction module toxin<br>(HMPREF9228_RS05665)          | 59                                                              |
|                                                         | 17.2         | 1591103-1591164                  | 1      | ATPase AAA (HMPREF9228_RS06745)                                         | 1066                                                            |
|                                                         | 16.38        | 282198-282249                    | 1      | IS3 family transposase<br>(HMPREF9228_RS01080)                          | 183                                                             |
|                                                         | 16.26        | 822879-822931                    | 1      | recombinase RecA                                                        | 55                                                              |

| Organism<br>(Genome ID)                                           | Bit<br>score | ANTAR-target RNA<br>co-ordinates | Strand | Annotation of the gene linked to<br>ANTAR-target RNAs<br>(Locus Tag) | Distance (nt) of RNA<br>from gene linked to<br>ANTAR-target RNA |
|-------------------------------------------------------------------|--------------|----------------------------------|--------|----------------------------------------------------------------------|-----------------------------------------------------------------|
|                                                                   |              |                                  |        | (HMPREF9228_RS03350)                                                 |                                                                 |
| Bifidobacterium breve DSM 20213 =<br>JCM 1192 DNA (NZ_AP012324.1) | 20.6         | 1590628-1590684                  | 1      | serpin family protein (BBBR_RS06980)                                 | 41                                                              |
|                                                                   | 17.59        | 788421-788354                    | -1     | Txe/YoeB family addiction module toxin<br>(BBBR_RS03210)             | 59                                                              |
|                                                                   | 17.2         | 548890-548829                    | -1     | ATPase AAA (BBBR_RS02190)                                            | 1066                                                            |
|                                                                   | 16.26        | 1382408-1382356                  | -1     | recombinase RecA (BBBR_RS05995)                                      | 55                                                              |
| Bifidobacterium breve JCM 7017<br>(NZ_CP006712.1)                 | 20.6         | 1542383-1542439                  | 1      | serpin family protein (B7017_RS06485)                                | 41                                                              |
|                                                                   | 18.02        | 578576-578515                    | -1     | ATPase AAA (B7017_RS02265)                                           | 7                                                               |
|                                                                   | 17.59        | 816831-816764                    | -1     | Txe/YoeB family addiction module toxin<br>(B7017_RS03260)            | 59                                                              |
|                                                                   | 16.26        | 1371305-1371253                  | -1     | recombinase RecA (B7017_RS05775)                                     | 55                                                              |
| Bifidobacterium breve JCM 7019<br>(NZ_CP006713.1)                 | 21.11        | 1022299-1022374                  | 1      | sugar ABC transporter permease<br>(B7019_RS04300)                    | 18                                                              |
|                                                                   | 20.6         | 1627645-1627701                  | 1      | serpin family protein (B7019_RS07170)                                | 41                                                              |
|                                                                   | 18.3         | 481305-481356                    | 1      | IS256 family transposase<br>(B7019_RS02000)                          | 27                                                              |
|                                                                   | 17.67        | 560496-560435                    | -1     | ATPase AAA (B7019_RS02290)                                           | 7                                                               |
|                                                                   | 17.08        | 2153758-2153815                  | 1      | hypothetical protein (B7019_RS09445)                                 | 51                                                              |
|                                                                   | 16.26        | 1449520-1449468                  | -1     | recombinase RecA (B7019_RS06425)                                     | 55                                                              |
| Bifidobacterium breve NCFB 2258<br>(NZ_CP006714.1)                | 20.6         | 1543740-1543796                  | 1      | serpin family protein (B2258_RS06500)                                | 41                                                              |
|                                                                   | 17.59        | 819838-819771                    | -1     | Txe/YoeB family addiction module toxin<br>(B2258_RS03295)            | 59                                                              |
|                                                                   | 17.2         | 580193-580132                    | -1     | ATPase AAA (B2258_RS02275)                                           | 1066                                                            |
|                                                                   | 16.38        | 253813-253864                    | 1      | IS3 family transposase (B2258_RS00940)                               | 183                                                             |
|                                                                   | 16.26        | 1371275-1371223                  | -1     | DNA recombination/repair protein RecA                                | 55                                                              |

| Organism<br>(Genome ID)                                | Bit<br>score | ANTAR-target RNA<br>co-ordinates | Strand | Annotation of the gene linked to<br>ANTAR-target RNAs<br>(Locus Tag) | Distance (nt) of RNA<br>from gene linked to<br>ANTAR-target RNA |
|--------------------------------------------------------|--------------|----------------------------------|--------|----------------------------------------------------------------------|-----------------------------------------------------------------|
|                                                        |              |                                  |        | (B2258_RS05785)                                                      |                                                                 |
| Bifidobacterium breve S27<br>(NZ_CP006716.1)           | 20.6         | 1587761-1587817                  | 1      | serpin family protein (BS27_RS06675)                                 | 41                                                              |
|                                                        | 17.59        | 860748-860681                    | -1     | Txe/YoeB family addiction module toxin<br>(BS27_RS03455)             | 59                                                              |
|                                                        | 17.2         | 624084-624023                    | -1     | ATPase AAA (BS27_RS02455)                                            | 1066                                                            |
|                                                        | 16.38        | 285280-285331                    | 1      | IS3 family transposase (BS27_RS01055)                                | 183                                                             |
|                                                        | 16.26        | 1420569-1420517                  | -1     | recombinase RecA (BS27_RS05990)                                      | 55                                                              |
| Bifidobacterium breve strain BR3<br>(NZ_CP010413.1)    | 20.6         | 521221-521165                    | -1     | serpin family protein (RY69_RS02295)                                 | 41                                                              |
|                                                        | 17.2         | 1598844-1598905                  | 1      | ATPase AAA (RY69_RS07155)                                            | 1066                                                            |
|                                                        | 16.13        | 1051877-1051923                  | 1      | hypothetical protein (RY69_RS04810)                                  | 208                                                             |
|                                                        | 16.01        | 681548-681600                    | 1      | recombinase RecA (RY69_RS02960)                                      | 55                                                              |
| Bifidobacterium breve strain LMC520<br>(NZ_CP019596.1) | 20.6         | 1647336-1647392                  | 1      | serpin family protein (BBL520_RS07465)                               | 41                                                              |
|                                                        | 17.2         | 611214-611153                    | -1     | ATPase AAA (BBL520_RS02640)                                          | 1066                                                            |
|                                                        | 16.13        | 1120327-1120281                  | -1     | hypothetical protein (BBL520_RS04915)                                | 208                                                             |
|                                                        | 16.01        | 1476706-1476654                  | -1     | recombinase RecA (BBL520_RS06735)                                    | 55                                                              |
| Bifidobacterium breve UCC2003<br>(NC_020517.1)         | 21.11        | 419361-419436                    | 1      | sugar ABC transporter permease<br>(BBR_RS11870)                      | 18                                                              |
|                                                        | 20.6         | 1647321-1647377                  | 1      | serpin family protein (BBR_RS17245)                                  | 41                                                              |
|                                                        | 18.17        | 396084-396033                    | -1     | IS256 family transposase<br>(BBR_RS11755)                            | 27                                                              |
|                                                        | 17.59        | 907425-907358                    | -1     | Txe/YoeB family addiction module toxin<br>(BBR_RS13945)              | 59                                                              |
|                                                        | 17.2         | 673882-673821                    | -1     | ATPase AAA (BBR_RS12970)                                             | 1066                                                            |
|                                                        | 16.38        | 300568-300619                    | 1      | IS3 family transposase (BBR_RS11370)                                 | 183                                                             |
|                                                        | 16.26        | 1476776-1476724                  | -1     | recombinase RecA (BBR_RS16530)                                       | 55                                                              |



| Organism<br>(Genome ID)                                                                | Bit<br>score | ANTAR-target RNA<br>co-ordinates | Strand | Annotation of the gene linked to<br>ANTAR-target RNAs<br>(Locus Tag) | Distance (nt) of RNA<br>from gene linked to<br>ANTAR-target RNA |
|----------------------------------------------------------------------------------------|--------------|----------------------------------|--------|----------------------------------------------------------------------|-----------------------------------------------------------------|
|                                                                                        | 16.13        | 1198206-1198160                  | -1     | hypothetical protein (BBR_RS15265)                                   | 208                                                             |
| Bifidobacterium catenulatum DSM<br>16992 = JCM 1194 = LMG 11043<br>DNA (NZ_AP012325.1) | 21.82        | 603559-603619                    | 1      | hypothetical protein (BBCT_RS02540)                                  | 11                                                              |
|                                                                                        | 20.47        | 1858333-1858280                  | -1     | DUF2142 domain-containing protein<br>(BBCT_RS07800)                  | 17                                                              |
|                                                                                        | 18.36        | 1553523-1553467                  | -1     | MFS transporter (BBCT_RS06595)                                       | 54                                                              |
|                                                                                        | 17.79        | 279728-279782                    | 1      | 50S ribosomal protein L19<br>(BBCT_RS01090)                          | 358                                                             |
|                                                                                        | 17.56        | 392162-392214                    | 1      | MFS transporter (BBCT_RS01550)                                       | 13                                                              |
|                                                                                        | 16.14        | 500565-500623                    | 1      | sugar ABC transporter substrate-binding<br>protein (BBCT_RS02095)    | 38                                                              |
| Bifidobacterium coryneforme strain<br>LMG18911 (NZ_CP007287.1)                         | 23.63        | 1150582-1150528                  | -1     | MFS transporter (bcor_RS04490)                                       | 46                                                              |
|                                                                                        | 16.33        | 1691827-1691880                  | 1      | VOC family protein (bcor_RS06865)                                    | 17                                                              |
| Bifidobacterium dentium Bd1<br>(NC_013714.1)                                           | 20.03        | 299280-299223                    | -1     | arabinan endo-1,5-alpha-L-arabinosidase<br>(BDP_RS01135)             | 39                                                              |
|                                                                                        | 19.4         | 2559866-2559797                  | -1     | alpha-glucosidase (BDP_RS10610)                                      | 2                                                               |
|                                                                                        | 17.73        | 1424860-1424909                  | 1      | ABC transporter substrate-binding protein<br>(BDP_RS06160)           | 8                                                               |
|                                                                                        | 17.32        | 166080-166138                    | 1      | sugar ABC transporter substrate-binding<br>protein (BDP_RS00645)     | 121                                                             |
|                                                                                        | 16.87        | 672199-672249                    | 1      | ABC transporter substrate-binding protein<br>(BDP_RS02780)           | 29                                                              |
|                                                                                        | 16.19        | 1524990-1524937                  | -1     | alcohol dehydrogenase (BDP_RS06575)                                  | 21                                                              |
|                                                                                        | 15.12        | 212515-212569                    | 1      | LacI family DNA-binding transcriptional<br>regulator (BDP_RS00805)   | 203                                                             |
| Bifidobacterium dentium JCM 1195 =<br>DSM 20436 DNA (NZ_AP012326.1)                    | 20.03        | 299282-299225                    | -1     | arabinan endo-1,5-alpha-L-arabinosidase<br>(BBDE_RS01135)            | 39                                                              |

| Organism<br>(Genome ID)                                                        | Bit<br>score | ANTAR-target RNA<br>co-ordinates | Strand | Annotation of the gene linked to<br>ANTAR-target RNAs<br>(Locus Tag)                    | Distance (nt) of RNA<br>from gene linked to<br>ANTAR-target RNA |
|--------------------------------------------------------------------------------|--------------|----------------------------------|--------|-----------------------------------------------------------------------------------------|-----------------------------------------------------------------|
|                                                                                | 19.4         | 2559168-2559099                  | -1     | threonine ammonia-lyase<br>(BBDE_RS10610)                                               | 2                                                               |
|                                                                                | 17.73        | 1424863-1424912                  | 1      | ABC transporter substrate-binding protein<br>(BBDE_RS06170)                             | 8                                                               |
|                                                                                | 17.32        | 166081-166139                    | 1      | sugar ABC transporter substrate-binding<br>protein (BBDE_RS00645)                       | 121                                                             |
|                                                                                | 16.87        | 672200-672250                    | 1      | ABC transporter substrate-binding protein<br>(BBDE_RS02785)                             | 29                                                              |
|                                                                                | 16.19        | 1524993-1524940                  | -1     | alcohol dehydrogenase (BBDE_RS06580)                                                    | 21                                                              |
|                                                                                | 15.12        | 212517-212571                    | 1      | LacI family transcriptional regulator<br>(BBDE_RS00805)                                 | 203                                                             |
| Bifidobacterium indicum LMG 11587 =<br>DSM 20214 (NZ_CP006018.1)               | 23.23        | 1129914-1129860                  | -1     | MFS transporter (BINDI_RS04395)                                                         | 46                                                              |
|                                                                                | 16.33        | 1664773-1664826                  | 1      | VOC family protein (BINDI_RS06740)                                                      | 17                                                              |
| Bifidobacterium kashiwanohense JCM<br>15439 = DSM 21854 DNA<br>(NZ_AP012327.1) | 23.71        | 2246953-2246903                  | -1     | sugar ABC transporter substrate-binding<br>protein (BBKW_RS09475)                       | 154                                                             |
| Bifidobacterium kashiwanohense JCM<br>15439 = DSM 21854 DNA<br>(NZ_AP012327.1) | 16.87        | 2142313-2142256                  | -1     | alpha/beta hydrolase (BBKW_RS09080)                                                     | 15                                                              |
|                                                                                | 16.87        | 2142324-2142256                  | -1     | alpha/beta hydrolase (BBKW_RS09080)                                                     | 15                                                              |
|                                                                                | 16.14        | 557790-557851                    | 1      | sugar ABC transporter substrate-binding<br>protein (BBKW_RS02345)                       | 38                                                              |
|                                                                                | 15.53        | 552772-552725                    | -1     | O-acetylhomoserine<br>aminocarboxypropyltransferase/cysteine<br>synthase (BBKW_RS02325) | 12                                                              |
|                                                                                | 15.53        | 552810-552725                    | -1     | O-acetylhomoserine<br>aminocarboxypropyltransferase/cysteine<br>synthase (BBKW_RS02325) | 12                                                              |
|                                                                                | 15.21        | 2152210-2152151                  | -1     | sugar ABC transporter substrate-binding<br>protein (BBKW_RS09115)                       | 20                                                              |

| Organism<br>(Genome ID)                                      | Bit<br>score | ANTAR-target RNA<br>co-ordinates | Strand | Annotation of the gene linked to<br>ANTAR-target RNAs<br>(Locus Tag) | Distance (nt) of RNA<br>from gene linked to<br>ANTAR-target RNA |
|--------------------------------------------------------------|--------------|----------------------------------|--------|----------------------------------------------------------------------|-----------------------------------------------------------------|
| Bifidobacterium kashiwanohense<br>PV20-2 (NZ_CP007456.1)     | 20.44        | 334680-334711                    | 1      | 50S ribosomal protein L19<br>(AH68_RS01310)                          | 369                                                             |
|                                                              | 20.21        | 2161764-2161708                  | -1     | sugar ABC transporter substrate-binding<br>protein (AH68_RS09265)    | 147                                                             |
|                                                              | 18.59        | 1763578-1763522                  | -1     | MFS transporter (AH68_RS07705)                                       | 54                                                              |
|                                                              | 17.57        | 560584-560537                    | -1     | hypothetical protein (AH68_RS02360)                                  | 12                                                              |
|                                                              | 17.55        | 2261564-2261614                  | 1      | beta-glucosidase (AH68_RS09650)                                      | 3                                                               |
|                                                              | 15.71        | 1901260-1901199                  | -1     | hypothetical protein (AH68_RS08170)                                  | 42                                                              |
|                                                              | 15.33        | 830090-830149                    | 1      | hypothetical protein (AH68_RS03510)                                  | 322                                                             |
| Bifidobacterium longum DJO10A<br>(NC_010816.1)               | 18.58        | 1451062-1451004                  | -1     | PEGA domain-containing protein<br>(BLD_RS06365)                      | 10                                                              |
|                                                              | 15.38        | 287435-287383                    | -1     | aldose 1-epimerase (BLD_RS01220)                                     | 23                                                              |
| Bifidobacterium longum DNA, strain:<br>105-A (NZ_AP014658.1) | 21.19        | 2161684-2161620                  | -1     | glycosyl hydrolase family 43<br>(BL105A_RS08940)                     | 31                                                              |
|                                                              | 18.58        | 198738-198796                    | 1      | serine protease (BL105A_RS00830)                                     | 10                                                              |
|                                                              | 16.34        | 631129-631190                    | 1      | hypothetical protein (BL105A_RS02540)                                | 2                                                               |
|                                                              | 15.44        | 2064960-2064904                  | -1     | glycosyltransferase family 2 protein<br>(BL105A_RS08660)             | 73                                                              |
|                                                              | 15.38        | 1353107-1353159                  | 1      | aldose 1-epimerase (BL105A_RS05765)                                  | 23                                                              |
| Bifidobacterium longum NCC2705<br>(NC_004307.2)              | 15.38        | 261999-261947                    | -1     | hypothetical protein (aldose 1-epimerase)<br>(BL1359)                | 23                                                              |
|                                                              | 18.58        | 208320-208378                    | 1      | PEGA domain-containing protein<br>(B624_RS00850)                     | 10                                                              |
|                                                              | 15.44        | 2087311-2087255                  | -1     | glycosyltransferase family 2 protein<br>(B624_RS08790)               | 73                                                              |
|                                                              | 15.38        | 892689-892637                    | -1     | aldose 1-epimerase (B624_RS03630)                                    | 23                                                              |

| Organism<br>(Genome ID)                                                                          | Bit<br>score | ANTAR-target RNA<br>co-ordinates | Strand | Annotation of the gene linked to<br>ANTAR-target RNAs<br>(Locus Tag) | Distance (nt) of RNA<br>from gene linked to<br>ANTAR-target RNA |
|--------------------------------------------------------------------------------------------------|--------------|----------------------------------|--------|----------------------------------------------------------------------|-----------------------------------------------------------------|
| Bifidobacterium longum strain BG7<br>(NZ_CP010453.1)                                             | 18.58        | 221198-221256                    | 1      | serine protease (BBG7_RS00940)                                       | 10                                                              |
|                                                                                                  | 18.3         | 510354-510303                    | -1     | IS256 family transposase<br>(BBG7_RS02240)                           | 27                                                              |
|                                                                                                  | 18.21        | 2252785-2252838                  | 1      | cell wall-binding repeat-containing protein<br>(BBG7_RS10960)        | 22                                                              |
|                                                                                                  | 15.38        | 1508758-1508810                  | 1      | aldose 1-epimerase (BBG7_RS06550)                                    | 23                                                              |
|                                                                                                  | 15.11        | 667887-667947                    | 1      | hypothetical protein (BBG7_RS02825)                                  | 2                                                               |
| Bifidobacterium longum strain BXY01<br>(NZ_CP008885.1)                                           | 20.6         | 1607611-1607667                  | 1      | serpin family protein (GS08_RS06860)                                 | 5                                                               |
|                                                                                                  | 16.71        | 1867745-1867806                  | 1      | gfo/ldh/MocA family oxidoreductase<br>(GS08_RS07885)                 | 36                                                              |
|                                                                                                  | 16.38        | 239917-239968                    | 1      | IS3 family transposase (GS08_RS10520)                                | 183                                                             |
|                                                                                                  | 16.01        | 815425-815493                    | 1      | GntR family transcriptional regulator<br>(GS08_RS03335)              | 168                                                             |
| Bifidobacterium longum subsp.<br>infantis 157F DNA (NC_015052.1)                                 | 18.58        | 201502-201560                    | 1      | serine protease (BLIF_RS00825)                                       | 10                                                              |
|                                                                                                  | 16.34        | 629092-629153                    | 1      | DUF2975 domain-containing protein<br>(BLIF_RS02475)                  | 2                                                               |
|                                                                                                  | 15.38        | 1482075-1482127                  | 1      | aldose 1-epimerase (BLIF_RS06550)                                    | 23                                                              |
| Bifidobacterium longum subsp.<br>infantis ATCC 15697 = JCM 1222 =<br>DSM 20088 DNA (NC_017219.1) | 22.89        | 918066-918010                    | -1     | serpin family protein (BLIJ_RS03995)                                 | 41                                                              |
| Bifidobacterium longum subsp.<br>infantis ATCC 15697 = JCM 1222 =<br>DSM 20088 DNA (NC_017219.1) | 20.21        | 47851-47907                      | 1      | sugar ABC transporter substrate-binding<br>protein (BLIJ_RS00230)    | 147                                                             |
|                                                                                                  | 18.17        | 321440-321389                    | -1     | IS256 family transposase<br>(BLIJ_RS01405)                           | 27                                                              |
|                                                                                                  | 16.8         | 2786662-2786609                  | -1     | glycosyl hydrolase (BLIJ_RS12785)                                    | 78                                                              |
|                                                                                                  | 15.91        | 1483251-1483310                  | 1      | hypothetical protein (BLIJ_RS06700)                                  | 91                                                              |

| Organism<br>(Genome ID)                                                                                                         | Bit<br>score | ANTAR-target RNA<br>co-ordinates | Strand | Annotation of the gene linked to<br>ANTAR-target RNAs<br>(Locus Tag) | Distance (nt) of RNA<br>from gene linked to<br>ANTAR-target RNA |
|---------------------------------------------------------------------------------------------------------------------------------|--------------|----------------------------------|--------|----------------------------------------------------------------------|-----------------------------------------------------------------|
|                                                                                                                                 | 15.84        | 683987-683926                    | -1     | gfo/ldh/MocA family oxidoreductase<br>(BLIJ_RS03070)                 | 36                                                              |
| Bifidobacterium longum subsp.<br>infantis ATCC 15697 (NC_011593.1)                                                              | 22.89        | 918275-918219                    | -1     | serpin family protein (BLON_RS03995)                                 | 5                                                               |
|                                                                                                                                 | 20.21        | 48060-48116                      | 1      | sugar ABC transporter substrate-binding<br>protein (BLON_RS00235)    | 147                                                             |
|                                                                                                                                 | 18.17        | 321649-321598                    | -1     | IS256 family transposase<br>(BLON_RS01410)                           | 27                                                              |
|                                                                                                                                 | 16.8         | 2790661-2790608                  | -1     | glycosyl hydrolase (BLON_RS12795)                                    | 78                                                              |
|                                                                                                                                 | 15.91        | 1483460-1483519                  | 1      | hypothetical protein (BLON_RS06700)                                  | 91                                                              |
|                                                                                                                                 | 15.84        | 684195-684134                    | -1     | gfo/ldh/MocA family oxidoreductase<br>(BLON_RS03065)                 | 36                                                              |
| Bifidobacterium longum subsp.<br>infantis genome assembly<br>Bifidobacterium longum subsp.<br>infantis CECT7210 (NZ_LN824140.1) | 18.58        | 2159815-2159873                  | 1      | PEGA domain-containing protein<br>(BN1726_RS09745)                   | 10                                                              |
|                                                                                                                                 | 16.34        | 153738-153799                    | 1      | hypothetical protein (BN1726_RS00600)                                | 2                                                               |
|                                                                                                                                 | 16.01        | 278919-278987                    | 1      | GntR family transcriptional regulator<br>(BN1726_RS01165)            | 168                                                             |
|                                                                                                                                 | 15.38        | 1010982-1011034                  | 1      | aldose 1-epimerase (BN1726_RS04805)                                  | 23                                                              |
| Bifidobacterium longum subsp.<br>infantis strain BT1 (NZ_CP010411.1)                                                            | 18.3         | 1097527-1097476                  | -1     | IS256 family transposase<br>(RY67_RS04575)                           | 27                                                              |
|                                                                                                                                 | 18.3         | 1998526-1998475                  | -1     | IS256 family transposase<br>(RY67_RS08410)                           | 27                                                              |
|                                                                                                                                 | 17.24        | 343541-343452                    | -1     | sugar ABC transporter permease<br>(RY67_RS01365)                     | 29                                                              |
|                                                                                                                                 | 16.8         | 686952-686899                    | -1     | glycosyl hydrolase (RY67_RS02785)                                    | 78                                                              |
|                                                                                                                                 | 16.38        | 1001169-1001220                  | 1      | IS3 family transposase (RY67_RS04170)                                | 183                                                             |
|                                                                                                                                 | 16.19        | 1838541-1838489                  | -1     | aldose epimerase (RY67_RS07740)                                      | 23                                                              |

| Organism<br>(Genome ID)                                               | Bit<br>score | ANTAR-target RNA<br>co-ordinates | Strand | Annotation of the gene linked to<br>ANTAR-target RNAs<br>(Locus Tag) | Distance (nt) of RNA<br>from gene linked to<br>ANTAR-target RNA |
|-----------------------------------------------------------------------|--------------|----------------------------------|--------|----------------------------------------------------------------------|-----------------------------------------------------------------|
|                                                                       | 16.01        | 1702086-1702033                  | -1     | serpin family protein (RY67_RS07215)                                 | 19                                                              |
|                                                                       | 15.84        | 1434174-1434113                  | -1     | gfo/ldh/MocA family oxidoreductase<br>(RY67_RS06135)                 | 36                                                              |
|                                                                       | 15.37        | 473578-473639                    | 1      | fucose isomerase (RY67_RS01995)                                      | 7                                                               |
|                                                                       | 15.11        | 76204-76144                      | -1     | hypothetical protein (RY67_RS00360)                                  | 2                                                               |
| Bifidobacterium longum subsp.<br>longum BBMN68 (NC_014656.1)          | 21.19        | 1762029-1762093                  | 1      | glycosyl hydrolase family 43<br>(BBMN68_RS07380)                     | 31                                                              |
|                                                                       | 18.58        | 1432813-1432755                  | -1     | PEGA domain-containing protein<br>(BBMN68_RS06090)                   | 10                                                              |
|                                                                       | 16.62        | 304709-304657                    | -1     | aldose 1-epimerase (BBMN68_RS01270)                                  | 23                                                              |
| Bifidobacterium longum subsp.<br>longum GT15 (NZ_CP006741.1)          | 18.58        | 282168-282226                    | 1      | serine protease (BLGT_RS01135)                                       | 10                                                              |
|                                                                       | 15.38        | 1526578-1526630                  | 1      | aldose 1-epimerase (BLGT_RS06480)                                    | 23                                                              |
|                                                                       | 15.11        | 766087-766147                    | 1      | hypothetical protein (BLGT_RS03075)                                  | 2                                                               |
| Bifidobacterium longum subsp.<br>longum JCM 1217 DNA<br>(NC_015067.1) | 21.19        | 2254131-2254067                  | -1     | glycosyl hydrolase family 43<br>(BLLJ_RS09555)                       | 31                                                              |
|                                                                       | 18.58        | 216505-216563                    | 1      | PEGA domain-containing protein<br>(BLLJ_RS00875)                     | 10                                                              |
|                                                                       | 15.38        | 1456774-1456826                  | 1      | aldose 1-epimerase (BLLJ_RS06415)                                    | 23                                                              |
| Bifidobacterium longum subsp.<br>longum JDM301 (NC_014169.1)          | 20.6         | 1608192-1608228                  | 1      | serpin family protein (BLJ_RS06860)                                  | 5                                                               |
|                                                                       | 16.71        | 1864966-1865027                  | 1      | gfo/ldh/MocA family oxidoreductase<br>(BLJ_RS07880)                  | 36                                                              |
|                                                                       | 16.38        | 239921-239972                    | 1      | IS3 family transposase (BLJ_RS00980)                                 | 183                                                             |
|                                                                       | 16.01        | 814071-814139                    | 1      | GntR family transcriptional regulator<br>(BLJ_RS03330)               | 168                                                             |
| Bifidobacterium longum subsp.<br>longum KACC 91563 (NC_017221.1)      | 18.58        | 2053635-2053577                  | -1     | PEGA domain-containing protein<br>(BLNIAS_RS08605)                   | 10                                                              |



| Organism<br>(Genome ID)                                                                      | Bit<br>score | ANTAR-target RNA<br>co-ordinates | Strand | Annotation of the gene linked to<br>ANTAR-target RNAs<br>(Locus Tag) | Distance (nt) of RNA<br>from gene linked to<br>ANTAR-target RNA |
|----------------------------------------------------------------------------------------------|--------------|----------------------------------|--------|----------------------------------------------------------------------|-----------------------------------------------------------------|
|                                                                                              | 15.38        | 858755-858703                    | -1     | aldose 1-epimerase (BLNIAS_RS03470)                                  | 23                                                              |
|                                                                                              | 15.11        | 1643808-1643748                  | -1     | hypothetical protein (BLNIAS_RS06980)                                | 2                                                               |
| Bifidobacterium longum subsp.<br>longum strain AH1206<br>(NZ_CP016019.1)                     | 21.19        | 2295601-2295537                  | -1     | glycosyl hydrolase family 43<br>(BL1206_RS09965)                     | 31                                                              |
|                                                                                              | 15.38        | 1497218-1497270                  | 1      | aldose 1-epimerase (BL1206_RS06775)                                  | 23                                                              |
|                                                                                              | 15.35        | 134683-134747                    | 1      | sugar ABC transporter substrate-binding<br>protein (BL1206_RS00535)  | 29                                                              |
| Bifidobacterium longum subsp.<br>longum strain CCUG30698<br>(NZ_CP011965.1)                  | 21.19        | 1681266-1681330                  | 1      | glycosyl hydrolase family 43<br>(BBL306_RS07430)                     | 31                                                              |
|                                                                                              | 18.58        | 203778-203836                    | 1      | serine protease (BBL306_RS00850)                                     | 10                                                              |
|                                                                                              | 16.34        | 637500-637561                    | 1      | hypothetical protein (BBL306_RS02550)                                | 2                                                               |
|                                                                                              | 15.38        | 1554627-1554679                  | 1      | aldose 1-epimerase (BBL306_RS07005)                                  | 23                                                              |
|                                                                                              | 18.58        | 193570-193628                    | 1      | serine protease (B8809_RS00770)                                      | 10                                                              |
|                                                                                              | 15.38        | 1367183-1367235                  | 1      | aldose 1-epimerase (B8809_RS05795)                                   | 23                                                              |
| Bifidobacterium pseudocatenulatum<br>DSM 20438 = JCM 1200 = LMG<br>10505 DNA (NZ_AP012330.1) | 20.21        | 2073057-2073001                  | -1     | sugar ABC transporter substrate-binding<br>protein (BBPC_RS08455)    | 146                                                             |
|                                                                                              | 18.36        | 1670440-1670384                  | -1     | MFS transporter (BBPC_RS06975)                                       | 54                                                              |
|                                                                                              | 16.79        | 210641-210700                    | 1      | alpha-arabinofuranosidase<br>(BBPC_RS00790)                          | 21                                                              |
|                                                                                              | 16.61        | 429639-429691                    | 1      | MFS transporter (BBPC_RS01680)                                       | 13                                                              |
|                                                                                              | 16.14        | 582184-582242                    | 1      | sugar ABC transporter substrate-binding<br>protein (BBPC_RS02385)    | 38                                                              |
|                                                                                              | 15.46        | 1217386-1217319                  | -1     | hypothetical protein (BBPC_RS05115)                                  | 18                                                              |
| Bifidobacterium pseudolongum PV8-2<br>(NZ_CP007457.1)                                        | 19.39        | 254651-254719                    | 1      | alpha-N-arabinofuranosidase<br>(AH67_RS01070)                        | 10                                                              |
|                                                                                              | 19.19        | 59994-59941                      | -1     | ABC transporter substrate-binding protein                            | 2                                                               |

| Organism<br>(Genome ID)                                                | Bit<br>score | ANTAR-target RNA<br>co-ordinates | Strand | Annotation of the gene linked to<br>ANTAR-target RNAs<br>(Locus Tag) | Distance (nt) of RNA<br>from gene linked to<br>ANTAR-target RNA |
|------------------------------------------------------------------------|--------------|----------------------------------|--------|----------------------------------------------------------------------|-----------------------------------------------------------------|
|                                                                        |              |                                  |        | (AH67_RS00270)                                                       |                                                                 |
| Bifidobacterium pseudolongum strain<br>DSM 20092 (NZ_CP017695.1)       | 15.7         | 1636840-1636906                  | 1      | LacI family transcriptional regulator<br>(BP20092_RS06750)           | 5                                                               |
| Bifidobacterium pseudolongum strain<br>UMB-MBP-01 (NZ_CP022544.1)      | 19.19        | 60846-60793                      | -1     | sugar ABC transporter ATP-binding<br>protein (BPSOL_RS00270)         | 2                                                               |
|                                                                        | 15.18        | 1884464-1884403                  | -1     | ABC transporter substrate-binding protein<br>(BPSOL_RS08000)         | 4                                                               |
| Bifidobacterium scardovii JCM 12489<br>= DSM 13734 DNA (NZ_AP012331.1) | 15.74        | 1087095-1087156                  | 1      | hypothetical protein (BBSC_RS04465)                                  | 2                                                               |
|                                                                        | 15.53        | 2861565-2861616                  | 1      | amidohydrolase family protein<br>(BBSC_RS11610)                      | 6                                                               |
|                                                                        | 15.32        | 2977285-2977227                  | -1     | beta-glucosidase (BBSC_RS12000)                                      | 11                                                              |
| Brachybacterium sp. P6-10-X1<br>(NZ_CP017297.1)                        | 20.33        | 3019349-3019293                  | -1     | HNH endonuclease (BH708_RS13655)                                     | 24                                                              |
|                                                                        | 20.33        | 753990-754046                    | 1      | HNH endonuclease (BH708_RS03375)                                     | 24                                                              |
|                                                                        | 20.33        | 3849341-3849285                  | -1     | hypothetical protein (BH708_RS17135)                                 | 24                                                              |
| Brevibacterium aurantiacum strain<br>SMQ-1335 (NZ_CP017150.1)          | 20.67        | 3576760-3576710                  | -1     | DNA-binding response regulator<br>(BLSMQ_RS16455)                    | 56                                                              |
|                                                                        | 17.36        | 2225991-2226056                  | 1      | SDR family NAD(P)-dependent<br>oxidoreductase (BLSMQ_RS10360)        | 34                                                              |
|                                                                        | 17.32        | 1661339-1661274                  | 1      | SAF domain-containing protein<br>(BLSMQ_RS07595)                     | 84                                                              |
|                                                                        | 16.49        | 3773876-3773930                  | 1      | 50S ribosomal protein L36<br>(BLSMQ_RS17335)                         | 2                                                               |
| Brevibacterium linens strain BS258<br>(NZ_CP014869.1)                  | 18.51        | 2010339-2010393                  | 1      | hypothetical protein (A2T55_RS08990)                                 | 23                                                              |
|                                                                        | 16.46        | 2170380-2170321                  | -1     | 30S ribosomal protein S1<br>(A2T55_RS09725)                          | 100                                                             |
|                                                                        | 15.22        | 378305-378358                    | 1      | TetR family transcriptional regulator<br>(A2T55_RS01660)             | 167                                                             |

| Organism<br>(Genome ID)                                                      | Bit<br>score | ANTAR-target RNA<br>co-ordinates | Strand | Annotation of the gene linked to<br>ANTAR-target RNAs<br>(Locus Tag) | Distance (nt) of RNA<br>from gene linked to<br>ANTAR-target RNA |
|------------------------------------------------------------------------------|--------------|----------------------------------|--------|----------------------------------------------------------------------|-----------------------------------------------------------------|
| Candidatus Nanopelagicus hibericus<br>isolate MMS-21-160<br>(NZ_CP016771.1)  | 23.73        | 508869-508923                    | 1      | DNA-binding response regulator<br>(B1s21160_RS02710)                 | 358                                                             |
|                                                                              | 15.66        | 1070146-1070090                  | -1     | NAD(P)/FAD-dependent oxidoreductase<br>(B1s21160_RS05485)            | 67                                                              |
| Candidatus Planktophilia dulcis isolate<br>MMS-21-155 (NZ_CP016770.1)        | 17.48        | 10956-11027                      | 1      | orotate phosphoribosyltransferase<br>(A1s21155_RS00055)              | 25                                                              |
|                                                                              | 17.48        | 10974-11045                      | 1      | orotate phosphoribosyltransferase<br>(A1sIA53_RS00060)               | 25                                                              |
| Candidatus Planktophilia dulcis isolate<br>MMS-IIA-65 (NZ_CP016777.1)        | 22.95        | 10943-11014                      | 1      | orotate phosphoribosyltransferase<br>(A1sIIA65_RS00055)              | 25                                                              |
| Candidatus Planktophilia sulfonica<br>isolate MMS-IA-56 (NZ_CP016773.1)      | 26.26        | 11044-11115                      | 1      | orotate phosphoribosyltransferase<br>(A1sIA56_RS00055)               | 25                                                              |
|                                                                              | 17.87        | 883253-883188                    | -1     | 30S ribosome-binding factor RbfA<br>(A1sIA56_RS04440)                | 53                                                              |
|                                                                              | 16.85        | 315907-315957                    | 1      | alpha/beta hydrolase (A1sIA56_RS01595)                               | 154                                                             |
| Candidatus Planktophilia versatilis<br>isolate MMS-IA-105<br>(NZ_CP016775.1) | 20.38        | 10992-11063                      | 1      | orotate phosphoribosyltransferase<br>(A1sIA105_RS00055)              | 25                                                              |
|                                                                              | 15.56        | 288544-288594                    | 1      | MarR family transcriptional regulator<br>(A1sIA105_RS01510)          | 345                                                             |
| Candidatus Rhodoluna planktonica<br>strain MWH-Dar1 (NZ_CP015208.1)          | 16.19        | 226162-226228                    | 1      | 2-keto-myo-inositol dehydratase<br>(A4Z71_RS01140)                   | 9                                                               |
| Catenulispora acidiphila DSM 44928<br>(NC_013131.1)                          | 19.55        | 8698218-8698252                  | 1      | MarR family transcriptional regulator<br>(CACI_RS37065)              | 8                                                               |
|                                                                              | 18.91        | 3728433-3728363                  | -1     | peptidase S53 (CACI_RS16775)                                         | 166                                                             |
| Cellulomonas gilvus ATCC 13127<br>(NC_015671.1)                              | 22.44        | 2826924-2826867                  | -1     | alpha-galactosidase (CELGI_RS12885)                                  | 4                                                               |
| Clavibacter michiganensis strain                                             | 16.87        | 2513441-2513384                  | -1     | extracellular solute-binding protein                                 | 5                                                               |

| Organism<br>(Genome ID)                                                                      | Bit<br>score | ANTAR-target RNA<br>co-ordinates | Strand | Annotation of the gene linked to<br>ANTAR-target RNAs<br>(Locus Tag)    | Distance (nt) of RNA<br>from gene linked to<br>ANTAR-target RNA |
|----------------------------------------------------------------------------------------------|--------------|----------------------------------|--------|-------------------------------------------------------------------------|-----------------------------------------------------------------|
| PF008 (NZ_CP012573.1)                                                                        |              |                                  |        | (AES38_RS11725)                                                         |                                                                 |
| Clavibacter michiganensis subsp.<br>insidiosus strain R1-1<br>(NZ_CP011043.1)                | 17.58        | 2403997-2403940                  | -1     | carbohydrate-binding protein<br>(VO01_RS11345)                          | 5                                                               |
| Clavibacter michiganensis subsp.<br>michiganensis NCPPB 382 complete<br>genome (NC_009480.1) | 19.13        | 2749746-2749689                  | -1     | carbohydrate-binding protein<br>(CMM_RS12990)                           | 5                                                               |
|                                                                                              | 18.53        | 2521590-2521533                  | -1     | sugar ABC transporter substrate-binding<br>protein (CMN_RS11770)        | 5                                                               |
| Cnuibacter physcomitrellae strain<br>XA(T) (NZ_CP020715.1)                                   | 15.94        | 3524655-3524708                  | 1      | hypothetical protein (B5808_RS16425)                                    | 25                                                              |
| Collinsella aerofaciens strain indica<br>(NZ_CP024160.1)                                     | 22.55        | 94937-94997                      | 1      | LysR family transcriptional regulator<br>(CSV91_RS00445)                | 135                                                             |
|                                                                                              | 17.26        | 1874478-1874557                  | 1      | hypothetical protein (CSV91_RS08165)                                    | 303                                                             |
|                                                                                              | 16.75        | 245313-245260                    | -1     | ketopantoate reductase family protein<br>(CSV91_RS01110)                | 76                                                              |
|                                                                                              | 16.69        | 1415774-1415725                  | -1     | LacI family DNA-binding transcriptional<br>regulator (CSV91_RS06205)    | 139                                                             |
| Conexibacter woesei DSM 14684<br>(NC_013739.1)                                               | 17.68        | 1067939-1067888                  | -1     | hypothetical protein (CWOE_RS05070)                                     | 186                                                             |
| Corynebacterium ammoniagenes<br>DSM 20306 strain 9.6<br>(NZ_CP009244.1)                      | 19.53        | 2657735-2657682                  | -1     | 30S ribosomal protein S6<br>(CAMM_RS12160)                              | 113                                                             |
|                                                                                              | 19.1         | 2166420-2166366                  | -1     | thymidylate kinase (CAMM_RS09935)                                       | 26                                                              |
|                                                                                              | 16.84        | 2331655-2331593                  | -1     | UDP-N-acetylglucosamine 1-<br>carboxyvinyltransferase<br>(CAMM_RS10675) | 104                                                             |
|                                                                                              | 15.22        | 2511464-2511408                  | -1     | aldehyde dehydrogenase<br>(CAMM_RS11515)                                | 102                                                             |
| Corynebacterium ammoniagenes                                                                 | 19.53        | 2744317-2744264                  | -1     | 30S ribosomal protein S6                                                | 113                                                             |

| Organism<br>(Genome ID)                                            | Bit<br>score | ANTAR-target RNA<br>co-ordinates | Strand | Annotation of the gene linked to<br>ANTAR-target RNAs<br>(Locus Tag)       | Distance (nt) of RNA<br>from gene linked to<br>ANTAR-target RNA |
|--------------------------------------------------------------------|--------------|----------------------------------|--------|----------------------------------------------------------------------------|-----------------------------------------------------------------|
| strain KCCM 40472<br>(NZ_CP019705.1)                               |              |                                  |        | (CA40472_RS12530)                                                          |                                                                 |
|                                                                    | 19.1         | 2253006-2252952                  | -1     | thymidylate kinase (CA40472_RS10300)                                       | 26                                                              |
|                                                                    | 16.84        | 2418238-2418176                  | -1     | UDP-N-acetylglucosamine 1-<br>carboxyvinyltransferase<br>(CA40472_RS11040) | 104                                                             |
|                                                                    | 15.22        | 2598046-2597990                  | -1     | aldehyde dehydrogenase<br>(CA40472_RS11885)                                | 102                                                             |
| Corynebacterium argentoratense<br>DSM 44202 (NC_022198.1)          | 18.42        | 34993-34937                      | -1     | hypothetical protein (CARG_RS00190)                                        | 349                                                             |
|                                                                    | 15.49        | 288997-289056                    | 1      | adenylate kinase (CARG_RS01425)                                            | 97                                                              |
|                                                                    | 15.27        | 841374-841433                    | 1      | 30S ribosomal protein S1<br>(CARG_RS04130)                                 | 85                                                              |
| Corynebacterium atypicum strain<br>R2070 (NZ_CP008944.1)           | 19.2         | 1161209-1161153                  | -1     | Paal family thioesterase<br>(CATYP_RS05335)                                | 31                                                              |
| Corynebacterium aurimucosum ATCC<br>700975 (NC_012590.1)           | 18.4         | 844165-844219                    | 1      | peptidyl-prolyl cis-trans isomerase<br>(CAURI_RS04070)                     | 44                                                              |
| Corynebacterium callunae DSM<br>20147 (NC_020506.1)                | 16.89        | 97710-97647                      | -1     | hypothetical protein (H924_RS00450)                                        | 276                                                             |
|                                                                    | 16.27        | 1149035-1149091                  | 1      | hypothetical protein (H924_RS05470)                                        | 7                                                               |
| Corynebacterium camporealensis<br>strain DSM 44610 (NZ_CP011311.1) | 15.73        | 906581-906635                    | 1      | DUF4245 domain-containing protein<br>(UL81_RS04305)                        | 149                                                             |
| Corynebacterium casei LMG S-19264<br>(NZ_CP004350.1)               | 19.66        | 282854-282795                    | -1     | glycosyltransferase family 2 protein<br>(CCASEI_RS01445)                   | 421                                                             |
|                                                                    | 15.69        | 2910386-2910434                  | 1      | hypothetical protein (CCASEI_RS13210)                                      | 188                                                             |
| Corynebacterium crudilactis strain<br>JZ16 (NZ_CP015622.1)         | 18.11        | 2138588-2138650                  | 1      | tRNA-Asn (ccrud_RS09975)                                                   | 6                                                               |
| Corynebacterium cystitidis strain<br>NCTC11863 1 (NZ_LT906473.1)   | 18.98        | 15053-15109                      | 1      | nucleotide exchange factor GrpE<br>(CKV99_RS00075)                         | 103                                                             |
| Corynebacterium deserti GIMN1.010                                  | 16.66        | 2493014-2492961                  | -1     | glucosamine-6-phosphate deaminase                                          | 4                                                               |

| Organism<br>(Genome ID)                                                      | Bit<br>score | ANTAR-target RNA<br>co-ordinates | Strand | Annotation of the gene linked to<br>ANTAR-target RNAs<br>(Locus Tag) | Distance (nt) of RNA<br>from gene linked to<br>ANTAR-target RNA |
|------------------------------------------------------------------------------|--------------|----------------------------------|--------|----------------------------------------------------------------------|-----------------------------------------------------------------|
| (NZ_CP009220.1)                                                              |              |                                  |        | (CDES_RS11560)                                                       |                                                                 |
|                                                                              | 15.31        | 1150457-1150513                  | 1      | DEAD/DEAH box helicase<br>(CDES_RS05425)                             | 7                                                               |
| Corynebacterium diphtheriae 241<br>(NC_016782.1)                             | 16.24        | 540599-540658                    | 1      | membrane protein (CD241_RS02710)                                     | 3                                                               |
|                                                                              | 15.1         | 1194999-1194943                  | -1     | FAD-linked oxidase (CD241_RS05755)                                   | 39                                                              |
| Corynebacterium diphtheriae 31A<br>(NC_016799.1)                             | 18.12        | 2366685-2366748                  | 1      | hypothetical protein (CD31A_RS11190)                                 | 71                                                              |
|                                                                              | 17.21        | 608792-608851                    | 1      | membrane protein (CD31A_RS03035)                                     | 384                                                             |
| Corynebacterium diphtheriae BH8<br>(NC_016800.1)                             | 18.12        | 2305800-2305863                  | 1      | hypothetical protein (CDBH8_RS11005)                                 | 71                                                              |
|                                                                              | 16.24        | 562111-562170                    | 1      | membrane protein (CDBH8_RS02830)                                     | 3                                                               |
| Corynebacterium diphtheriae C7<br>(beta) (NC_016801.1)                       | 17.21        | 564481-564540                    | 1      | membrane protein (CDC7B_RS02855)                                     | 384                                                             |
| Corynebacterium diphtheriae CDCE<br>8392 (NC_016785.1)                       | 17.21        | 554666-554725                    | 1      | membrane protein (CDCE8392_RS02825)                                  | 3                                                               |
|                                                                              | 15.25        | 1806319-1806266                  | -1     | hypothetical protein<br>(CDCE8392_RS11940)                           | 18                                                              |
| Corynebacterium diphtheriae genome<br>assembly NCTC113971<br>(NZ_LN831026.1) | 17.21        | 528602-528661                    | 1      | membrane protein (AT687_RS02655)                                     | 384                                                             |
| Corynebacterium diphtheriae HC01<br>(NC_016786.1)                            | 16.24        | 540570-540629                    | 1      | membrane protein (CDHC01_RS02700)                                    | 3                                                               |
|                                                                              | 15.1         | 1194968-1194912                  | -1     | FAD-linked oxidase (CDHC01_RS05760)                                  | 39                                                              |
| Corynebacterium diphtheriae HC02<br>(NC_016802.1)                            | 17.37        | 2293876-2293939                  | 1      | transposase (CDHC02_RS12255)                                         | 71                                                              |
|                                                                              | 16.24        | 562291-562350                    | 1      | membrane protein (CDHC02_RS02800)                                    | 3                                                               |
| Corynebacterium diphtheriae HC03<br>(NC_016787.1)                            | 17.37        | 2287584-2287647                  | 1      | transposase (CDHC03_RS12065)                                         | 71                                                              |
|                                                                              | 17.21        | 542020-542079                    | 1      | membrane protein (CDHC03_RS02695)                                    | 384                                                             |
| Corynebacterium diphtheriae HC04<br>(NC_016788.1)                            | 17.37        | 2311402-2311465                  | 1      | transposase (CDHC04_RS12195)                                         | 71                                                              |
|                                                                              | 17.21        | 530537-530596                    | 1      | membrane protein (CDHC04_RS02615)                                    | 384                                                             |

| Organism<br>(Genome ID)                                              | Bit<br>score | ANTAR-target RNA<br>co-ordinates | Strand | Annotation of the gene linked to<br>ANTAR-target RNAs<br>(Locus Tag) | Distance (nt) of RNA<br>from gene linked to<br>ANTAR-target RNA |
|----------------------------------------------------------------------|--------------|----------------------------------|--------|----------------------------------------------------------------------|-----------------------------------------------------------------|
|                                                                      | 15.1         | 1194413-1194357                  | -1     | FAD-linked oxidase (CDHC04_RS05780)                                  | 39                                                              |
| Corynebacterium diphtheriae INCA<br>402 (NC_016783.1)                | 16.24        | 544750-544809                    | 1      | membrane protein (CDB402_RS02690)                                    | 3                                                               |
| Corynebacterium diphtheriae NCTC<br>13129 (NC_002935.2)              | 17.21        | 582246-582305                    | 1      | membrane protein (DIP_RS14365)                                       | 3                                                               |
|                                                                      | 15.25        | 1881495-1881442                  | -1     | hypothetical protein (DIP_RS23555)                                   | 18                                                              |
| Corynebacterium diphtheriae PW8<br>(NC_016789.1)                     | 17.21        | 609691-609750                    | 1      | membrane protein (CDPW8_RS03110)                                     | 384                                                             |
| Corynebacterium diphtheriae strain B-<br>D-16-78 (NZ_CP018331.1)     | 16.24        | 2272880-2272939                  | 1      | membrane protein (BS112_RS11015)                                     | 3                                                               |
| Corynebacterium diphtheriae strain<br>FDAARGOS_197 (NZ_CP020410.1)   | 17.21        | 2449468-2449527                  | 1      | membrane protein (A6J36_RS11710)                                     | 384                                                             |
|                                                                      | 15.25        | 1259703-1259650                  | -1     | hypothetical protein (A6J36_RS05950)                                 | 18                                                              |
| Corynebacterium diphtheriae VA01<br>(NC_016790.1)                    | 17.37        | 2208578-2208641                  | 1      | transposase (CDVA01_RS11645)                                         | 71                                                              |
|                                                                      | 17.21        | 519377-519436                    | 1      | membrane protein (CDVA01_RS02540)                                    | 384                                                             |
|                                                                      | 15.1         | 1161803-1161747                  | -1     | FAD-linked oxidase (CDVA01_RS05515)                                  | 39                                                              |
| Corynebacterium efficiens YS-314<br>DNA (NC_004369.1)                | 20.35        | 2288328-2288390                  | 1      | hypothetical protein (CE_RS14970)                                    | 245                                                             |
| Corynebacterium efficiens YS-314<br>DNA (NC_004369.1)                | 19.22        | 2797301-2797242                  | -1     | nucleotide exchange factor GrpE<br>(CE_RS13010)                      | 20                                                              |
| Corynebacterium epidermidicis<br>strain DSM 45586 (NZ_CP011541.1)    | 15.51        | 542196-542146                    | -1     | O-acetyl-L-homoserine sulfhydrylase<br>(CEPID_RS02575)               | 95                                                              |
| Corynebacterium falsenii DSM 44353<br>strain BL 8171 (NZ_CP007156.1) | 16.91        | 1654540-1654593                  | 1      | amino acid-binding ACT domain protein<br>(BI88_RS07010)              | 97                                                              |
| Corynebacterium flavescens strain<br>OJ8 (NZ_CP009246.1)             | 16.26        | 1947958-1948017                  | 1      | ABC transporter ATP-binding protein<br>(CFLV_RS08970)                | 294                                                             |
| Corynebacterium glaucum strain DSM<br>30827 (NZ_CP019688.1)          | 15.95        | 718849-718909                    | 1      | hypothetical protein (CGLAU_RS03530)                                 | 42                                                              |

| Organism<br>(Genome ID)                                                            | Bit<br>score | ANTAR-target RNA<br>co-ordinates | Strand | Annotation of the gene linked to<br>ANTAR-target RNAs<br>(Locus Tag) | Distance (nt) of RNA<br>from gene linked to<br>ANTAR-target RNA |
|------------------------------------------------------------------------------------|--------------|----------------------------------|--------|----------------------------------------------------------------------|-----------------------------------------------------------------|
| Corynebacterium glutamicum ATCC<br>13032 (NC_003450.3)                             | 17.48        | 2984618-2984562                  | -1     | heat shock protein GrpE (NCgl2701)                                   | 21                                                              |
|                                                                                    | 15.4         | 2735190-2735137                  | -1     | ABC transporter permease (NCgl2484)                                  | 5                                                               |
|                                                                                    | 15.31        | 1209941-1209997                  | 1      | helicase (NCgl1109)                                                  | 7                                                               |
| Corynebacterium glutamicum ATCC<br>13032, IS fingerprint type 4-5<br>(NC_006958.1) | 17.48        | 2957923-2957867                  | -1     | nucleotide exchange factor GrpE<br>(CGTRNA_RS13835)                  | 21                                                              |
|                                                                                    | 15.4         | 2706860-2706808                  | -1     | phosphate ABC transporter, permease<br>protein PstA (CGTRNA_RS12735) | 47                                                              |
|                                                                                    | 15.31        | 1211409-1211465                  | 1      | DEAD/DEAH box helicase<br>(CGTRNA_RS05780)                           | 7                                                               |
| Corynebacterium glutamicum ATCC<br>14067 (NZ_CP022614.1)                           | 16.55        | 638609-638553                    | -1     | UDP-glucose 4-epimerase GalE<br>(CEY17_RS03130)                      | 64                                                              |
|                                                                                    | 15.4         | 2681755-2681703                  | -1     | phosphate ABC transporter, permease<br>protein PstA (CEY17_RS13150)  | 47                                                              |
|                                                                                    | 15.31        | 1289628-1289684                  | 1      | DEAD/DEAH box helicase<br>(CEY17_RS06335)                            | 7                                                               |
|                                                                                    | 15.24        | 1188383-1188440                  | 1      | MFS transporter (CEY17_RS05865)                                      | 43                                                              |
| Corynebacterium glutamicum DNA,<br>strain: AJ1511 (NZ_AP017557.1)                  | 15.4         | 2685573-2685521                  | -1     | phosphate ABC transporter, permease<br>protein PstA (CGBL_RS12700)   | 47                                                              |
|                                                                                    | 15.31        | 1316640-1316696                  | 1      | ATP-dependent RNA helicase<br>(CGBL_RS06275)                         | 7                                                               |
|                                                                                    | 15.24        | 1218594-1218651                  | 1      | MFS transporter (CGBL_RS05825)                                       | 43                                                              |
| Corynebacterium glutamicum DNA,<br>strain: N24 (NZ_AP017369.1)                     | 18.59        | 3179973-3179917                  | -1     | nucleotide exchange factor GrpE<br>(N24_RS14630)                     | 21                                                              |
|                                                                                    | 16.52        | 1657111-1657172                  | 1      | MerR family transcriptional regulator<br>(N24_RS07815)               | 15                                                              |
|                                                                                    | 15.68        | 2337810-2337750                  | -1     | NADP-specific glutamate dehydrogenase<br>(N24_RS10865)               | 67                                                              |



| Organism<br>(Genome ID)                                                                                    | Bit<br>score | ANTAR-target RNA<br>co-ordinates | Strand | Annotation of the gene linked to<br>ANTAR-target RNAs<br>(Locus Tag) | Distance (nt) of RNA<br>from gene linked to<br>ANTAR-target RNA |
|------------------------------------------------------------------------------------------------------------|--------------|----------------------------------|--------|----------------------------------------------------------------------|-----------------------------------------------------------------|
|                                                                                                            | 15.31        | 1359688-1359744                  | 1      | ATP-dependent RNA helicase<br>(N24_RS06480)                          | 7                                                               |
|                                                                                                            | 15.21        | 2843690-2843740                  | 1      | FadR family transcriptional regulator<br>(N24_RS13155)               | 82                                                              |
|                                                                                                            | 15.12        | 3237214-3237161                  | -1     | PRD domain-containing protein<br>(N24_RS14870)                       | 10                                                              |
| Corynebacterium glutamicum K051<br>complete genome, strain ATCC<br>13032, sub-strain K051<br>(NC_020519.1) | 17.48        | 2984617-2984561                  | -1     | nucleotide exchange factor GrpE<br>(WA5_RS14000)                     | 21                                                              |
|                                                                                                            | 15.4         | 2735189-2735137                  | -1     | phosphate ABC transporter, permease<br>protein PstA (WA5_RS12905)    | 47                                                              |
|                                                                                                            | 15.31        | 1209940-1209996                  | 1      | helicase (WA5_RS05750)                                               | 7                                                               |
| Corynebacterium glutamicum MB001<br>(NC_022040.1)                                                          | 17.48        | 2754470-2754414                  | -1     | nucleotide exchange factor GrpE<br>(CGP_RS12880)                     | 21                                                              |
|                                                                                                            | 15.4         | 2503403-2503351                  | -1     | phosphate ABC transporter, permease<br>protein PstA (CGP_RS11780)    | 47                                                              |
|                                                                                                            | 15.31        | 1212837-1212893                  | 1      | helicase (CGP_RS05770)                                               | 7                                                               |
| Corynebacterium glutamicum R DNA<br>(NC_009342.1)                                                          | 20.62        | 714117-714064                    | -1     | Paal family thioesterase (CGR_RS03420)                               | 385                                                             |
|                                                                                                            | 17.48        | 2977118-2977062                  | -1     | nucleotide exchange factor GrpE<br>(CGR_RS13900)                     | 21                                                              |
|                                                                                                            | 16.55        | 735566-735510                    | -1     | UDP-glucose 4-epimerase GalE<br>(CGR_RS03515)                        | 64                                                              |
|                                                                                                            | 16.4         | 1256913-1256970                  | 1      | MFS transporter (CGR_RS05950)                                        | 43                                                              |
|                                                                                                            | 15.67        | 3018403-3018350                  | -1     | PRD domain-containing protein<br>(CGR_RS14090)                       | 10                                                              |
|                                                                                                            | 15.4         | 2734181-2734129                  | -1     | phosphate ABC transporter, permease<br>protein PstA (CGR_RS12865)    | 47                                                              |
|                                                                                                            | 15.31        | 1352549-1352605                  | 1      | DEAD/DEAH box helicase                                               | 7                                                               |

| Organism<br>(Genome ID)                                  | Bit<br>score | ANTAR-target RNA<br>co-ordinates | Strand | Annotation of the gene linked to<br>ANTAR-target RNAs<br>(Locus Tag) | Distance (nt) of RNA<br>from gene linked to<br>ANTAR-target RNA |
|----------------------------------------------------------|--------------|----------------------------------|--------|----------------------------------------------------------------------|-----------------------------------------------------------------|
|                                                          |              |                                  |        | (CGR_RS06390)                                                        |                                                                 |
| Corynebacterium glutamicum SCgG1<br>(NC_021351.1)        | 20.62        | 701116-701063                    | -1     | Paal family thioesterase (C624_RS03385)                              | 385                                                             |
|                                                          | 17.48        | 3001152-3001096                  | -1     | nucleotide exchange factor GrpE<br>(C624_RS13910)                    | 21                                                              |
|                                                          | 16.55        | 722574-722518                    | -1     | UDP-glucose 4-epimerase GalE<br>(C624_RS03480)                       | 64                                                              |
|                                                          | 15.67        | 3044637-3044584                  | -1     | PRD domain-containing protein<br>(C624_RS14110)                      | 10                                                              |
|                                                          | 15.4         | 2753889-2753837                  | -1     | phosphate ABC transporter, permease<br>protein PstA (C624_RS12865)   | 47                                                              |
|                                                          | 15.31        | 1401709-1401765                  | 1      | DEAD/DEAH box helicase<br>(C624_RS06640)                             | 7                                                               |
| Corynebacterium glutamicum SCgG2<br>(NC_021352.1)        | 20.62        | 701117-701064                    | -1     | Paal family thioesterase (C629_RS03385)                              | 385                                                             |
|                                                          | 17.48        | 3001151-3001095                  | -1     | nucleotide exchange factor GrpE<br>(C629_RS13905)                    | 21                                                              |
|                                                          | 16.55        | 722575-722519                    | -1     | UDP-glucose 4-epimerase GalE<br>(C629_RS03480)                       | 64                                                              |
|                                                          | 15.67        | 3044636-3044583                  | -1     | PRD domain-containing protein<br>(C629_RS14105)                      | 10                                                              |
|                                                          | 15.4         | 2753888-2753836                  | -1     | phosphate ABC transporter, permease<br>protein PstA (C629_RS12860)   | 47                                                              |
|                                                          | 15.31        | 1401708-1401764                  | 1      | DEAD/DEAH box helicase<br>(C629_RS06635)                             | 7                                                               |
| Corynebacterium glutamicum strain<br>AR1 (NZ_CP007724.1) | 20.62        | 626016-625963                    | -1     | Paal family thioesterase<br>(CGLAR1_RS03095)                         | 385                                                             |
|                                                          | 17.25        | 1164052-1164109                  | 1      | MFS transporter (CGLAR1_RS05565)                                     | 44                                                              |
|                                                          | 15.4         | 2573691-2573639                  | -1     | phosphate ABC transporter, permease                                  | 47                                                              |

| Organism<br>(Genome ID)                                         | Bit<br>score | ANTAR-target RNA<br>co-ordinates | Strand | Annotation of the gene linked to<br>ANTAR-target RNAs<br>(Locus Tag) | Distance (nt) of RNA<br>from gene linked to<br>ANTAR-target RNA |
|-----------------------------------------------------------------|--------------|----------------------------------|--------|----------------------------------------------------------------------|-----------------------------------------------------------------|
|                                                                 |              |                                  |        | protein PstA (CGLAR1_RS12090)                                        |                                                                 |
|                                                                 | 15.31        | 1259623-1259679                  | 1      | DEAD/DEAH box helicase<br>(CGLAR1_RS06005)                           | 7                                                               |
| Corynebacterium glutamicum strain<br>ATCC 13869 (NZ_CP016335.1) | 15.4         | 2685568-2685516                  | -1     | phosphate ABC transporter, permease<br>protein PstA (BBD29_RS12560)  | 47                                                              |
|                                                                 | 15.31        | 1314970-1315026                  | 1      | ATP-dependent RNA helicase<br>(BBD29_RS06195)                        | 7                                                               |
|                                                                 | 15.24        | 1216979-1217036                  | 1      | MFS transporter (BBD29_RS05735)                                      | 43                                                              |
| Corynebacterium glutamicum strain<br>ATCC 21831 (NZ_CP007722.1) | 20.62        | 656832-656779                    | -1     | Paal family thioesterase (AR0_RS03220)                               | 385                                                             |
|                                                                 | 17.25        | 1194869-1194926                  | 1      | MFS transporter (AR0_RS05680)                                        | 44                                                              |
|                                                                 | 15.4         | 2604096-2604044                  | -1     | phosphate ABC transporter, permease<br>protein PstA (AR0_RS12200)    | 47                                                              |
|                                                                 | 15.31        | 1290440-1290496                  | 1      | DEAD/DEAH box helicase<br>(AR0_RS06120)                              | 7                                                               |
| Corynebacterium glutamicum strain<br>B253 (NZ_CP010451.1)       | 15.4         | 2601352-2601300                  | -1     | phosphate ABC transporter, permease<br>protein PstA (SB89_RS12100)   | 47                                                              |
|                                                                 | 15.31        | 1286056-1286112                  | 1      | DEAD/DEAH box helicase<br>(SB89_RS06035)                             | 7                                                               |
|                                                                 | 15.24        | 1179688-1179745                  | 1      | MFS transporter (SB89_RS05560)                                       | 43                                                              |
| Corynebacterium glutamicum strain<br>CP (NZ_CP012194.1)         | 15.4         | 2729849-2729797                  | -1     | phosphate ABC transporter, permease<br>protein PstA (AC079_RS12905)  | 47                                                              |
|                                                                 | 15.31        | 1355779-1355835                  | 1      | DEAD/DEAH box helicase<br>(AC079_RS06490)                            | 7                                                               |
|                                                                 | 15.24        | 1257734-1257791                  | 1      | MFS transporter (AC079_RS06035)                                      | 43                                                              |
| Corynebacterium glutamicum strain<br>TQ2223 (NZ_CP020658.1)     | 17.48        | 3060506-3060562                  | 1      | nucleotide exchange factor GrpE<br>(B7P23_RS14495)                   | 21                                                              |
|                                                                 | 15.4         | 28885-28938                      | 1      | phosphate ABC transporter, permease                                  | 5                                                               |

| Organism<br>(Genome ID)                                                       | Bit<br>score                                               | ANTAR-target RNA<br>co-ordinates | Strand          | Annotation of the gene linked to<br>ANTAR-target RNAs<br>(Locus Tag) | Distance (nt) of RNA<br>from gene linked to<br>ANTAR-target RNA     |
|-------------------------------------------------------------------------------|------------------------------------------------------------|----------------------------------|-----------------|----------------------------------------------------------------------|---------------------------------------------------------------------|
|                                                                               |                                                            |                                  |                 | protein PstA (B7P23_RS00130)                                         |                                                                     |
|                                                                               | 15.31                                                      | 1522687-1522631                  | -1              | helicase (B7P23_RS07145)                                             | 7                                                                   |
| Corynebacterium glutamicum strain<br>USDA-ARS-USMARC-56828<br>(NZ_CP013991.1) | 17.48                                                      | 2931080-2931024                  | -1              | nucleotide exchange factor GrpE<br>(APT58_RS13695)                   | 21                                                                  |
|                                                                               | 15.67                                                      | 2972568-2972515                  | -1              | transcription antiterminator BglG<br>(APT58_RS13885)                 | 10                                                                  |
|                                                                               | 15.61                                                      | 672726-672673                    | -1              | Paal family thioesterase<br>(APT58_RS03280)                          | 385                                                                 |
|                                                                               | 15.4                                                       | 2683030-2682978                  | -1              | phosphate ABC transporter, permease<br>protein PstA (APT58_RS12645)  | 47                                                                  |
|                                                                               | 15.31                                                      | 1310879-1310935                  | 1               | DEAD/DEAH box helicase<br>(APT58_RS06245)                            | 7                                                                   |
|                                                                               | 15.27                                                      | 438395-438335                    | -1              | esterase family protein (APT58_RS02155)                              | 368                                                                 |
|                                                                               | Corynebacterium glutamicum strain<br>WM001 (NZ_CP022394.1) | 15.4                             | 2237589-2237537 | -1                                                                   | phosphate ABC transporter, permease<br>protein PstA (CGB98_RS10580) |
| 15.31                                                                         |                                                            | 865646-865702                    | 1               | ATP-dependent RNA helicase<br>(CGB98_RS04160)                        | 7                                                                   |
| 15.24                                                                         |                                                            | 767600-767657                    | 1               | MFS transporter (CGB98_RS03710)                                      | 43                                                                  |
| Corynebacterium glutamicum strain<br>XV (NZ_CP018175.1)                       | 15.4                                                       | 2705759-2705707                  | -1              | phosphate ABC transporter, permease<br>protein PstA (BSP99_RS12860)  | 47                                                                  |
|                                                                               | 15.4                                                       | 2718514-2718462                  | -1              | phosphate ABC transporter, permease<br>protein PstA (BSP99_RS12945)  | 47                                                                  |
|                                                                               | 15.31                                                      | 1323843-1323899                  | 1               | ATP-dependent RNA helicase<br>(BSP99_RS06370)                        | 7                                                                   |
|                                                                               | 15.24                                                      | 1225797-1225854                  | 1               | MFS transporter (BSP99_RS05915)                                      | 43                                                                  |
| Corynebacterium glutamicum strain YI<br>(NZ_CP014984.1)                       | 16.55                                                      | 637028-636972                    | -1              | UDP-glucose 4-epimerase GalE<br>(A3654_RS03070)                      | 64                                                                  |

| Organism<br>(Genome ID)                                                    | Bit<br>score | ANTAR-target RNA<br>co-ordinates | Strand | Annotation of the gene linked to<br>ANTAR-target RNAs<br>(Locus Tag) | Distance (nt) of RNA<br>from gene linked to<br>ANTAR-target RNA |
|----------------------------------------------------------------------------|--------------|----------------------------------|--------|----------------------------------------------------------------------|-----------------------------------------------------------------|
|                                                                            | 15.4         | 2676018-2675966                  | -1     | phosphate ABC transporter, permease<br>protein PstA (A3654_RS13005)  | 47                                                              |
|                                                                            | 15.31        | 1289003-1289059                  | 1      | DEAD/DEAH box helicase<br>(A3654_RS06260)                            | 7                                                               |
|                                                                            | 15.24        | 1187758-1187815                  | 1      | MFS transporter (A3654_RS05790)                                      | 43                                                              |
| Corynebacterium glutamicum ZL-6<br>(NZ_CP004062.1)                         | 15.4         | 2716163-2716111                  | -1     | phosphate ABC transporter, permease<br>protein PstA (C627_RS12795)   | 47                                                              |
|                                                                            | 15.31        | 1332273-1332329                  | 1      | ATP-dependent RNA helicase<br>(C627_RS06325)                         | 7                                                               |
|                                                                            | 15.24        | 1234226-1234283                  | 1      | MFS transporter (C627_RS05865)                                       | 43                                                              |
| Corynebacterium glyciniphilum AJ<br>3170 (NZ_CP006842.1)                   | 20.66        | 641835-641767                    | -1     | acyl-CoA oxidase (CGLY_RS02960)                                      | 249                                                             |
| Corynebacterium humireducens<br>NBRC 106098 = DSM 45392<br>(NZ_CP005286.1) | 17.13        | 2213593-2213539                  | -1     | tRNA-Asp (B842_RS10925)                                              | 38                                                              |
| Corynebacterium imitans strain DSM<br>44264 (NZ_CP009211.1)                | 15.08        | 817633-817686                    | 1      | TrkA family potassium uptake protein<br>(CIMIT_RS03730)              | 88                                                              |
| Corynebacterium imitans strain<br>NCTC13015 1 (NZ_LT906467.1)              | 15.08        | 899599-899652                    | 1      | TrkA family potassium uptake protein<br>(CKV97_RS04135)              | 40                                                              |
| Corynebacterium jeikeium strain<br>FDAARGOS_328 (NZ_CP022054.1)            | 19.04        | 276098-276155                    | 1      | hypothetical protein (CEQ06_RS01215)                                 | 32                                                              |
|                                                                            | 15.47        | 2197898-2197951                  | 1      | hypothetical protein (CEQ06_RS09770)                                 | 34                                                              |
|                                                                            | 15.14        | 1717433-1717377                  | -1     | nucleotide exchange factor GrpE<br>(CEQ06_RS07760)                   | 8                                                               |
| Corynebacterium kroppenstedtii DSM<br>44385 (NC_012704.1)                  | 16.99        | 1893895-1893951                  | 1      | hypothetical protein (CKROP_RS07925)                                 | 5                                                               |
|                                                                            | 16.31        | 1439672-1439725                  | 1      | lclR family transcriptional regulator<br>(CKROP_RS05980)             | 370                                                             |
| Corynebacterium lactis RW2-5                                               | 21.46        | 144577-144541                    | -1     | glycosyltransferase family 2 protein                                 | 159                                                             |

| Organism<br>(Genome ID)                                                    | Bit<br>score | ANTAR-target RNA<br>co-ordinates | Strand | Annotation of the gene linked to<br>ANTAR-target RNAs<br>(Locus Tag)                 | Distance (nt) of RNA<br>from gene linked to<br>ANTAR-target RNA |
|----------------------------------------------------------------------------|--------------|----------------------------------|--------|--------------------------------------------------------------------------------------|-----------------------------------------------------------------|
| (NZ_CP006841.1)                                                            |              |                                  |        | (CLAC_RS00545)                                                                       |                                                                 |
|                                                                            | 19.94        | 2631157-2631106                  | -1     | hypothetical protein (CLAC_RS11575)                                                  | 54                                                              |
| Corynebacterium marinum DSM<br>44953 plasmid pCmarinum2<br>(NZ_CP007791.1) | 17.39        | 8792-8740                        | -1     | replicase RepA (B840_RS13300)                                                        | 357                                                             |
| Corynebacterium mustelae strain<br>DSM 45274 (NZ_CP011542.1)               | 16.62        | 1400440-1400500                  | 1      | hypothetical protein (CMUST_RS06530)                                                 | 54                                                              |
| Corynebacterium phocae strain<br>M408/89/1 (NZ_CP009249.1)                 | 15.58        | 723165-723214                    | 1      | bifunctional folylpolyglutamate<br>synthase/dihydrofolate synthase<br>(CPHO_RS03305) | 93                                                              |
| Corynebacterium pseudotuberculosis<br>1/06-A (NC_017308.1)                 | 16.04        | 1945271-1945324                  | 1      | cardiolipin synthase (CP106_RS08885)                                                 | 26                                                              |
| Corynebacterium pseudotuberculosis<br>1002 (NC_017300.1)                   | 16.51        | 1995873-1995926                  | 1      | cardiolipin synthase (CP1002_RS09075)                                                | 26                                                              |
| Corynebacterium pseudotuberculosis<br>258 (NC_017945.2)                    | 16.04        | 2028099-2028152                  | 1      | cardiolipin synthase (CP258_RS09260)                                                 | 26                                                              |
| Corynebacterium pseudotuberculosis<br>267 (NC_017462.1)                    | 16.04        | 1998436-1998489                  | 1      | cardiolipin synthase (CP267_RS09070)                                                 | 26                                                              |
| Corynebacterium pseudotuberculosis<br>3/99-5 (NC_016781.1)                 | 16.04        | 1998501-1998554                  | 1      | cardiolipin synthase (CP3995_RS09100)                                                | 26                                                              |
| Corynebacterium pseudotuberculosis<br>316 (NC_016932.1)                    | 16.04        | 1969760-1969813                  | 1      | cardiolipin synthase (CP316_RS08945)                                                 | 26                                                              |
| Corynebacterium pseudotuberculosis<br>42/02-A (NC_017306.1)                | 16.04        | 1998385-1998438                  | 1      | cardiolipin synthase (CP4202_RS09095)                                                | 26                                                              |
| Corynebacterium pseudotuberculosis<br>C231 (NC_017301.1)                   | 16.04        | 1988938-1988991                  | 1      | cardiolipin synthase (CPC231_RS19465)                                                | 26                                                              |
| Corynebacterium pseudotuberculosis<br>CIP 52.97 (NC_017307.2)              | 16.04        | 2026638-2026691                  | 1      | cardiolipin synthase<br>(CPCIP5297_RS09505)                                          | 26                                                              |

| Organism<br>(Genome ID)                                            | Bit<br>score | ANTAR-target RNA<br>co-ordinates | Strand | Annotation of the gene linked to<br>ANTAR-target RNAs<br>(Locus Tag) | Distance (nt) of RNA<br>from gene linked to<br>ANTAR-target RNA |
|--------------------------------------------------------------------|--------------|----------------------------------|--------|----------------------------------------------------------------------|-----------------------------------------------------------------|
| Corynebacterium pseudotuberculosis<br>Cp162 (NC_018019.2)          | 16.04        | 2024914-2024967                  | 1      | cardiolipin synthase (CP162_RS09460)                                 | 26                                                              |
| Corynebacterium pseudotuberculosis<br>FRC41 (NC_014329.1)          | 16.04        | 1998568-1998621                  | 1      | cardiolipin synthase (CPFRC_RS09100)                                 | 26                                                              |
| Corynebacterium pseudotuberculosis<br>I19 (NC_017303.2)            | 16.04        | 1998109-1998162                  | 1      | cardiolipin synthase (CPI19_RS09295)                                 | 26                                                              |
| Corynebacterium pseudotuberculosis<br>P54B96 (NC_017031.1)         | 16.04        | 1998340-1998393                  | 1      | cardiolipin synthase<br>(CPP54B96_RS09090)                           | 26                                                              |
| Corynebacterium pseudotuberculosis<br>PAT10 (NC_017305.1)          | 16.04        | 1995966-1996019                  | 1      | cardiolipin synthase (CPPAT10_RS09080)                               | 26                                                              |
| Corynebacterium pseudotuberculosis<br>strain 1002B (NZ_CP012837.1) | 16.51        | 854171-854118                    | -1     | cardiolipin synthase (Cp1002B_RS03865)                               | 26                                                              |
| Corynebacterium pseudotuberculosis<br>strain 12C (NZ_CP011474.1)   | 16.51        | 1998115-1998168                  | 1      | cardiolipin synthase (Cp12C_RS09100)                                 | 26                                                              |
| Corynebacterium pseudotuberculosis<br>strain 226 (NZ_CP010889.1)   | 16.04        | 1998442-1998495                  | 1      | cardiolipin synthase (CP226_RS09090)                                 | 26                                                              |
| Corynebacterium pseudotuberculosis<br>strain 262 (NZ_CP012022.2)   | 16.04        | 2021693-2021746                  | 1      | cardiolipin synthase (Cp262_RS09400)                                 | 26                                                              |
| Corynebacterium pseudotuberculosis<br>strain 29156 (NZ_CP010795.1) | 16.04        | 854831-854778                    | -1     | cardiolipin synthase (Cp29156_RS03900)                               | 26                                                              |
| Corynebacterium pseudotuberculosis<br>strain 32 (NZ_CP015183.1)    | 16.04        | 2060899-2060952                  | 1      | cardiolipin synthase (A4R72_RS09470)                                 | 26                                                              |
| Corynebacterium pseudotuberculosis<br>strain 33 (NZ_CP015184.1)    | 16.04        | 2060913-2060966                  | 1      | cardiolipin synthase (A4R71_RS09485)                                 | 26                                                              |
| Corynebacterium pseudotuberculosis<br>strain 34 (NZ_CP015192.1)    | 16.04        | 2060808-2060861                  | 1      | cardiolipin synthase (A4R69_RS09465)                                 | 26                                                              |
| Corynebacterium pseudotuberculosis<br>strain 35 (NZ_CP015185.1)    | 16.04        | 2060864-2060917                  | 1      | cardiolipin synthase (A4R68_RS09485)                                 | 26                                                              |

| <b>Organism<br/>(Genome ID)</b>                                      | <b>Bit<br/>score</b> | <b>ANTAR-target RNA<br/>co-ordinates</b> | <b>Strand</b> | <b>Annotation of the gene linked to<br/>ANTAR-target RNAs<br/>(Locus Tag)</b> | <b>Distance (nt) of RNA<br/>from gene linked to<br/>ANTAR-target RNA</b> |
|----------------------------------------------------------------------|----------------------|------------------------------------------|---------------|-------------------------------------------------------------------------------|--------------------------------------------------------------------------|
| Corynebacterium pseudotuberculosis strain 36 (NZ_CP015186.1)         | 16.04                | 2060782-2060835                          | 1             | cardiolipin synthase (A4R67_RS09460)                                          | 26                                                                       |
| Corynebacterium pseudotuberculosis strain 38 (NZ_CP015187.1)         | 16.04                | 2060890-2060943                          | 1             | cardiolipin synthase (A4R66_RS09460)                                          | 26                                                                       |
| Corynebacterium pseudotuberculosis strain 39 (NZ_CP015188.1)         | 16.04                | 2060955-2061008                          | 1             | cardiolipin synthase (A4R65_RS09455)                                          | 26                                                                       |
| Corynebacterium pseudotuberculosis strain 43 (NZ_CP015189.1)         | 16.04                | 2022444-2022497                          | 1             | cardiolipin synthase (A4R64_RS09255)                                          | 26                                                                       |
| Corynebacterium pseudotuberculosis strain 46 (NZ_CP015190.1)         | 16.04                | 2023915-2023968                          | 1             | cardiolipin synthase (A4R63_RS09235)                                          | 26                                                                       |
| Corynebacterium pseudotuberculosis strain 48 (NZ_CP015191.1)         | 16.04                | 2060676-2060729                          | 1             | cardiolipin synthase (A4R62_RS09470)                                          | 26                                                                       |
| Corynebacterium pseudotuberculosis strain 48252 (NZ_CP008922.1)      | 16.04                | 214647-214700                            | 1             | cardiolipin synthase (CPTA_RS01030)                                           | 26                                                                       |
| Corynebacterium pseudotuberculosis strain ATCC 19410 (NZ_CP021251.1) | 16.04                | 854231-854178                            | -1            | cardiolipin synthase (CpATCC19410_RS03970)                                    | 26                                                                       |
| Corynebacterium pseudotuberculosis strain Cp13 (NZ_CP014998.1)       | 16.51                | 2002902-2002955                          | 1             | cardiolipin synthase (CpCp13_RS09135)                                         | 26                                                                       |
| Corynebacterium pseudotuberculosis strain CS_10 (NZ_CP008923.1)      | 16.04                | 1381691-1381638                          | -1            | cardiolipin synthase (CPTB_RS06210)                                           | 26                                                                       |
| Corynebacterium pseudotuberculosis strain E19 (NZ_CP012136.1)        | 16.04                | 2026360-2026413                          | 1             | cardiolipin synthase (CpE19_RS09260)                                          | 26                                                                       |
| Corynebacterium pseudotuberculosis strain E55 (NZ_CP014341.1)        | 16.04                | 853706-853653                            | -1            | cardiolipin synthase (CpE55_RS03870)                                          | 26                                                                       |
| Corynebacterium pseudotuberculosis strain E56 (NZ_CP013699.1)        | 16.04                | 853708-853655                            | -1            | cardiolipin synthase (AN398_RS03860)                                          | 26                                                                       |
| Corynebacterium pseudotuberculosis                                   | 16.04                | 1018334-1018281                          | -1            | cardiolipin synthase (CPTC_RS04600)                                           | 26                                                                       |



| Organism<br>(Genome ID)                                            | Bit<br>score | ANTAR-target RNA<br>co-ordinates | Strand | Annotation of the gene linked to<br>ANTAR-target RNAs<br>(Locus Tag) | Distance (nt) of RNA<br>from gene linked to<br>ANTAR-target RNA |
|--------------------------------------------------------------------|--------------|----------------------------------|--------|----------------------------------------------------------------------|-----------------------------------------------------------------|
| strain Ft_2193/67 (NZ_CP008924.1)                                  |              |                                  |        |                                                                      |                                                                 |
| Corynebacterium pseudotuberculosis<br>strain I37 (NZ_CP017384.1)   | 16.04        | 2027288-2027341                  | 1      | cardiolipin synthase (CPI37_RS09430)                                 | 26                                                              |
| Corynebacterium pseudotuberculosis<br>strain MB11 (NZ_CP013260.1)  | 16.04        | 2131290-2131343                  | 1      | cardiolipin synthase (ATN02_RS09730)                                 | 26                                                              |
| Corynebacterium pseudotuberculosis<br>strain MB14 (NZ_CP013261.1)  | 16.04        | 2027869-2027922                  | 1      | cardiolipin synthase (ATN03_RS09285)                                 | 26                                                              |
| Corynebacterium pseudotuberculosis<br>strain MB20 (NZ_CP016829.1)  | 16.04        | 971322-971269                    | -1     | cardiolipin synthase (CPMB20_RS04670)                                | 26                                                              |
| Corynebacterium pseudotuberculosis<br>strain MB278 (NZ_CP023395.1) | 16.04        | 2027958-2028011                  | 1      | cardiolipin synthase (BFF96_RS09510)                                 | 26                                                              |
| Corynebacterium pseudotuberculosis<br>strain MB30 (NZ_CP013262.2)  | 16.04        | 2026744-2026797                  | 1      | cardiolipin synthase (ATN04_RS09500)                                 | 26                                                              |
| Corynebacterium pseudotuberculosis<br>strain MB302 (NZ_CP021982.1) | 16.04        | 2025938-2025991                  | 1      | cardiolipin synthase (BFG01_RS09500)                                 | 26                                                              |
| Corynebacterium pseudotuberculosis<br>strain MB66 (NZ_CP013263.1)  | 16.04        | 971242-971189                    | -1     | cardiolipin synthase (ATN05_RS04530)                                 | 26                                                              |
| Corynebacterium pseudotuberculosis<br>strain MEX1 (NZ_CP017711.1)  | 16.04        | 854185-854132                    | -1     | cardiolipin synthase (CpMEX1_RS03945)                                | 26                                                              |
| Corynebacterium pseudotuberculosis<br>strain MEX25 (NZ_CP013697.1) | 16.04        | 854204-854151                    | -1     | cardiolipin synthase (AN397_RS03870)                                 | 26                                                              |
| Corynebacterium pseudotuberculosis<br>strain MEX29 (NZ_CP016826.1) | 16.04        | 854229-854176                    | -1     | cardiolipin synthase<br>(CpMEX29_RS03870)                            | 26                                                              |
| Corynebacterium pseudotuberculosis<br>strain MEX30 (NZ_CP017291.1) | 16.04        | 2026292-2026345                  | 1      | cardiolipin synthase<br>(CpMEX30_RS09515)                            | 26                                                              |
| Corynebacterium pseudotuberculosis<br>strain MEX31 (NZ_CP017292.1) | 16.04        | 2026049-2026102                  | 1      | cardiolipin synthase<br>(CpMEX31_RS09480)                            | 26                                                              |
| Corynebacterium pseudotuberculosis                                 | 16.04        | 854213-854160                    | -1     | cardiolipin synthase (CpMEX9_RS03890)                                | 26                                                              |

| Organism<br>(Genome ID)                                             | Bit<br>score | ANTAR-target RNA<br>co-ordinates | Strand | Annotation of the gene linked to<br>ANTAR-target RNAs<br>(Locus Tag)           | Distance (nt) of RNA<br>from gene linked to<br>ANTAR-target RNA |
|---------------------------------------------------------------------|--------------|----------------------------------|--------|--------------------------------------------------------------------------------|-----------------------------------------------------------------|
| strain MEX9 (NZ_CP014543.1)                                         |              |                                  |        |                                                                                |                                                                 |
| Corynebacterium pseudotuberculosis strain MIC6 (NZ_CP019769.1)      | 16.51        | 1997836-1997889                  | 1      | cardiolipin synthase (CpMIC6_RS09295)                                          | 26                                                              |
| Corynebacterium pseudotuberculosis strain N1 (NZ_CP013146.1)        | 16.04        | 854467-854414                    | -1     | cardiolipin synthase (CpN1_RS03870)                                            | 26                                                              |
| Corynebacterium pseudotuberculosis strain PA01 (NZ_CP013327.1)      | 16.04        | 1998430-1998483                  | 1      | cardiolipin synthase (CpPA01_RS09085)                                          | 26                                                              |
| Corynebacterium pseudotuberculosis strain PA02 (NZ_CP015309.1)      | 16.51        | 1989095-1989148                  | 1      | cardiolipin synthase (CpPA02_RS09055)                                          | 26                                                              |
| Corynebacterium pseudotuberculosis strain PA04 (NZ_CP019587.1)      | 16.04        | 1998550-1998603                  | 1      | cardiolipin synthase (CpPa04_RS09295)                                          | 26                                                              |
| Corynebacterium pseudotuberculosis strain phoP (NZ_CP019768.1)      | 16.51        | 854156-854103                    | -1     | cardiolipin synthase (CpPhoP_RS03960)                                          | 26                                                              |
| Corynebacterium pseudotuberculosis strain PO222/4-1 (NZ_CP013698.1) | 16.04        | 854197-854144                    | -1     | cardiolipin synthase (AK970_RS03870)                                           | 26                                                              |
| Corynebacterium pseudotuberculosis strain PO269-5 (NZ_CP012695.1)   | 16.04        | 854164-854111                    | -1     | cardiolipin synthase (AN902_RS03875)                                           | 26                                                              |
| Corynebacterium pseudotuberculosis strain SigmaE (NZ_CP020356.1)    | 16.51        | 854123-854070                    | -1     | cardiolipin synthase (CpSigmaE_RS03950)                                        | 26                                                              |
| Corynebacterium pseudotuberculosis strain T1 (NZ_CP015100.1)        | 16.51        | 1997875-1997928                  | 1      | cardiolipin synthase (CpT1_RS09115)                                            | 26                                                              |
| Corynebacterium pseudotuberculosis strain VD57 (NZ_CP009927.1)      | 16.51        | 1997850-1997903                  | 1      | cardiolipin synthase (cpvd57_RS09075)                                          | 26                                                              |
| Corynebacterium resistens DSM 45100 (NC_015673.1)                   | 23.06        | 784296-784358                    | 1      | bifunctional folylpolyglutamate synthase/dihydrofolate synthase (CRES_RS03270) | 84                                                              |
| Corynebacterium simulans strain PES1 (NZ_CP014634.1)                | 19.51        | 2038187-2038240                  | 1      | alanine:cation symporter family protein (WM42_RS09435)                         | 422                                                             |

| Organism<br>(Genome ID)                                           | Bit<br>score | ANTAR-target RNA<br>co-ordinates | Strand | Annotation of the gene linked to<br>ANTAR-target RNAs<br>(Locus Tag) | Distance (nt) of RNA<br>from gene linked to<br>ANTAR-target RNA |
|-------------------------------------------------------------------|--------------|----------------------------------|--------|----------------------------------------------------------------------|-----------------------------------------------------------------|
|                                                                   | 15.04        | 1825255-1825308                  | 1      | hypoxanthine phosphoribosyltransferase<br>(WM42_RS08480)             | 31                                                              |
| Corynebacterium simulans strain<br>Wattiau (NZ_CP014635.1)        | 19.51        | 2075643-2075696                  | 1      | alanine:cation symporter family protein<br>(AWU68_RS09625)           | 422                                                             |
| Corynebacterium singulare strain IBS<br>B52218 (NZ_CP010827.1)    | 15.06        | 379234-379174                    | -1     | ABC transporter permease<br>(CSING_RS01710)                          | 51                                                              |
| Corynebacterium sp. ATCC 6931<br>(NZ_CP008913.1)                  | 19.04        | 2170035-2170092                  | 1      | hypothetical protein (DR71_RS09350)                                  | 32                                                              |
|                                                                   | 15.57        | 2171805-2171866                  | 1      | phosphoglycerate dehydrogenase<br>(DR71_RS09355)                     | 158                                                             |
|                                                                   | 15.29        | 533505-533558                    | 1      | CBS domain-containing protein<br>(DR71_RS02185)                      | 6                                                               |
| Corynebacterium sp. NML98-0116<br>genome (NZ_CP017639.1)          | 19.17        | 282870-282926                    | 1      | nucleotide exchange factor GrpE<br>(BJP05_RS01180)                   | 39                                                              |
| Corynebacterium stationis strain<br>622=DSM 20302 (NZ_CP009251.1) | 19.79        | 301620-301569                    | -1     | peptidase M23 (CSTAT_RS01510)                                        | 372                                                             |
|                                                                   | 19.05        | 658233-658185                    | -1     | ribonuclease HI (CSTAT_RS03225)                                      | 5                                                               |
| Corynebacterium striatum strain KC-<br>Na-01 (NZ_CP021252.1)      | 19.51        | 737452-737505                    | 1      | alanine:cation symporter family protein<br>(CBE89_RS03575)           | 422                                                             |
|                                                                   | 16.4         | 192948-193016                    | 1      | hypothetical protein (CBE89_RS01090)                                 | 25                                                              |
| Corynebacterium terpenotabidum Y-<br>11 (NC_021663.1)             | 18.6         | 266084-266134                    | 1      | N-carbamoylsarcosine amidase<br>(A606_RS01080)                       | 361                                                             |
| Corynebacterium testudinoris strain<br>DSM 44614 (NZ_CP011545.1)  | 16.85        | 2111774-2111716                  | -1     | TetR/AcrR family transcriptional regulator<br>(CTEST_RS10110)        | 71                                                              |
| Corynebacterium ulcerans 0102 DNA<br>(NC_018101.1)                | 15.6         | 1773540-1773605                  | 1      | serine/threonine protein kinase<br>(CULC0102_RS08195)                | 315                                                             |
| Corynebacterium ulcerans 809<br>(NC_017317.1)                     | 15.6         | 1691258-1691323                  | 1      | serine/threonine protein kinase<br>(CULC809_RS07755)                 | 315                                                             |
| Corynebacterium ulcerans BR-AD22                                  | 15.6         | 1694931-1694996                  | 1      | serine/threonine protein kinase                                      | 315                                                             |

| Organism<br>(Genome ID)                                                  | Bit<br>score | ANTAR-target RNA<br>co-ordinates | Strand | Annotation of the gene linked to<br>ANTAR-target RNAs<br>(Locus Tag)        | Distance (nt) of RNA<br>from gene linked to<br>ANTAR-target RNA |
|--------------------------------------------------------------------------|--------------|----------------------------------|--------|-----------------------------------------------------------------------------|-----------------------------------------------------------------|
| (NC_015683.1)                                                            |              |                                  |        | (CULC22_RS07730)                                                            |                                                                 |
| Corynebacterium ulcerans FRC58<br>(NZ_CP011913.1)                        | 15.6         | 1677923-1677988                  | 1      | serine/threonine protein kinase<br>(CULFRC58_RS07655)                       | 315                                                             |
|                                                                          | 15.17        | 330052-330103                    | 1      | hypothetical protein<br>(CULFRC58_RS01565)                                  | 193                                                             |
| Corynebacterium ulcerans strain<br>05146 (NZ_CP009716.1)                 | 16.55        | 2091358-2091409                  | 1      | Na <sup>+</sup> /H <sup>+</sup> antiporter subunit E<br>(CUL05146_RS09480)  | 39                                                              |
|                                                                          | 15.6         | 1642146-1642211                  | 1      | serine/threonine protein kinase<br>(CUL05146_RS07450)                       | 315                                                             |
| Corynebacterium ulcerans strain<br>131001 (NZ_CP010818.1)                | 15.6         | 1681236-1681301                  | 1      | serine/threonine protein kinase<br>(Cul131001_RS07640)                      | 315                                                             |
| Corynebacterium ulcerans strain<br>210931 (NZ_CP009583.1)                | 16.55        | 2122575-2122626                  | 1      | Na <sup>+</sup> /H <sup>+</sup> antiporter subunit E<br>(CUL210931_RS09775) | 39                                                              |
|                                                                          | 15.6         | 1637127-1637192                  | 1      | serine/threonine protein kinase<br>(CUL210931_RS07495)                      | 315                                                             |
| Corynebacterium ulcerans strain<br>210932 (NZ_CP009500.1)                | 15.6         | 1681546-1681611                  | 1      | serine/threonine protein kinase<br>(CUL210932_RS07655)                      | 315                                                             |
| Corynebacterium ulcerans strain<br>NCTC7910 1 (NZ_LT906443.1)            | 15.6         | 661088-661153                    | 1      | serine/threonine protein kinase<br>(CKV68_RS02940)                          | 315                                                             |
| Corynebacterium ulcerans strain<br>PO100/5 (NZ_CP021417.1)               | 17.7         | 1615651-1615601                  | -1     | terminase (CBE74_RS07650)                                                   | 24                                                              |
|                                                                          | 15.45        | 2207204-2207255                  | 1      | Na <sup>+</sup> /H <sup>+</sup> antiporter subunit E<br>(CBE74_RS10395)     | 39                                                              |
|                                                                          | 15.24        | 2530763-2530701                  | -1     | aldose epimerase (CBE74_RS11790)                                            | 278                                                             |
| Corynebacterium urealyticum DSM<br>7109 complete genome<br>(NC_010545.1) | 21.91        | 2341876-2341820                  | -1     | NUDIX domain-containing protein<br>(CU_RS10045)                             | 487                                                             |
|                                                                          | 19.64        | 547036-547092                    | 1      | biotin--[acetyl-CoA-carboxylase] ligase<br>(CU_RS02260)                     | 435                                                             |

| Organism<br>(Genome ID)                                           | Bit<br>score | ANTAR-target RNA<br>co-ordinates | Strand | Annotation of the gene linked to<br>ANTAR-target RNAs<br>(Locus Tag) | Distance (nt) of RNA<br>from gene linked to<br>ANTAR-target RNA |
|-------------------------------------------------------------------|--------------|----------------------------------|--------|----------------------------------------------------------------------|-----------------------------------------------------------------|
|                                                                   | 15.54        | 657867-657914                    | 1      | PDZ domain-containing protein<br>(CU_RS02720)                        | 28                                                              |
| Corynebacterium urealyticum DSM<br>7111 (NC_020230.1)             | 19.64        | 536435-536491                    | 1      | biotin--[acetyl-CoA-carboxylase] ligase<br>(CU7111_RS02240)          | 435                                                             |
|                                                                   | 15.54        | 637433-637480                    | 1      | PDZ domain-containing protein<br>(CU7111_RS02665)                    | 28                                                              |
| Corynebacterium urealyticum strain<br>NCTC12011 1 (NZ_LT906481.1) | 21.91        | 1654930-1654874                  | -1     | NUDIX domain-containing protein<br>(CKV82_RS07305)                   | 487                                                             |
|                                                                   | 19.64        | 2232424-2232480                  | 1      | biotin--[acetyl-CoA-carboxylase] ligase<br>(CKV82_RS09705)           | 435                                                             |
|                                                                   | 15.54        | 2346331-2346378                  | 1      | PDZ domain-containing protein<br>(CKV82_RS10185)                     | 28                                                              |
| Corynebacterium uterequi strain DSM<br>45634 (NZ_CP011546.1)      | 16.32        | 857566-857513                    | -1     | glycogen synthase (CUTER_RS04050)                                    | 88                                                              |
|                                                                   | 15.31        | 1596657-1596597                  | -1     | heme-copper oxidase subunit III<br>(CUTER_RS07405)                   | 340                                                             |
| Cryobacterium arcticum strain PAMC<br>27867 1 (NZ_CP016282.1)     | 22.35        | 3698660-3698598                  | -1     | LacI family transcriptional regulator<br>(PA27867_RS16790)           | 6                                                               |
|                                                                   | 16.53        | 2539464-2539403                  | -1     | alcohol dehydrogenase<br>(PA27867_RS11370)                           | 33                                                              |
| Cryobacterium sp. LW097<br>(NZ_CP021992.1)                        | 15.46        | 403166-403220                    | 1      | sugar ABC transporter substrate-binding<br>protein (B7495_RS01925)   | 52                                                              |
| Cryptobacterium curtum DSM 15641<br>(NC_013170.1)                 | 18.86        | 1081472-1081416                  | -1     | glucan-binding protein (CCUR_RS04640)                                | 18                                                              |
|                                                                   | 18.81        | 205749-205805                    | 1      | glucan-binding protein (CCUR_RS00825)                                | 18                                                              |
| Curtobacterium pusillum strain AA3<br>(NZ_CP018783.1)             | 15.84        | 3814213-3814266                  | 1      | peptide ABC transporter substrate-binding<br>protein (BUE88_RS18120) | 14                                                              |
| Curtobacterium sp. MR_MD2014<br>(NZ_CP009755.1)                   | 18.57        | 210772-210718                    | -1     | gfo/ldh/MocA family oxidoreductase<br>(NI26_RS01060)                 | 7                                                               |

| Organism<br>(Genome ID)                                                  | Bit<br>score | ANTAR-target RNA<br>co-ordinates | Strand | Annotation of the gene linked to<br>ANTAR-target RNAs<br>(Locus Tag)  | Distance (nt) of RNA<br>from gene linked to<br>ANTAR-target RNA |
|--------------------------------------------------------------------------|--------------|----------------------------------|--------|-----------------------------------------------------------------------|-----------------------------------------------------------------|
|                                                                          | 16.03        | 27231-27283                      | 1      | sugar phosphate isomerase/epimerase<br>(NI26_RS00130)                 | 5                                                               |
| Cutibacterium acnes strain KCOM<br>1861 (= ChDC B594)<br>(NZ_CP012647.1) | 19.1         | 246678-246614                    | -1     | hypothetical protein (RN83_RS01045)                                   | 45                                                              |
| Cutibacterium avidum 44067<br>(NC_021064.1)                              | 20.99        | 2362551-2362500                  | -1     | LacI family transcriptional regulator<br>(PALO_RS10760)               | 45                                                              |
| Cutibacterium avidum strain DPC<br>6544 (NZ_CP016954.1)                  | 17.48        | 1895877-1895946                  | 1      | hypothetical protein (BFS79_RS08475)                                  | 30                                                              |
|                                                                          | 15.35        | 2604770-2604819                  | 1      | endo-beta-N-acetylglucosaminidase<br>(BFS79_RS11695)                  | 17                                                              |
|                                                                          | 15.21        | 1301579-1301520                  | -1     | WhiB family transcriptional regulator<br>(BFS79_RS05970)              | 292                                                             |
| Cutibacterium granulorum strain<br>NCTC11865 1 (NZ_LT906441.1)           | 19.21        | 1211974-1212044                  | 1      | putative lysophospholipase<br>(CKV91_RS05110)                         | 23                                                              |
| Denitrobacterium detoxificans strain<br>NPOH1 (NZ_CP011402.1)            | 17.65        | 1421804-1421754                  | -1     | 3-methyl-2-oxobutanoate dehydrogenase<br>subunit VorB (AAY81_RS06090) | 5                                                               |
|                                                                          | 15.74        | 1266680-1266733                  | 1      | ribonuclease HII (AAY81_RS05420)                                      | 63                                                              |
| Dermabacter vaginalis strain AD1-86<br>(NZ_CP012117.1)                   | 20.61        | 21017-21071                      | 1      | restriction endonuclease subunit S<br>(DAD186_RS10515)                | 26                                                              |
|                                                                          | 15.6         | 2034083-2034033                  | -1     | cytoplasmic protein (DAD186_RS08980)                                  | 6                                                               |
| Dermacoccus nishinomiyaensis strain<br>M25 (NZ_CP008889.1)               | 15.87        | 2422894-2422838                  | -1     | TetR/AcrR family transcriptional regulator<br>(HX89_RS10945)          | 23                                                              |
| Dermatophilus congolensis strain<br>NCTC13039 1 (NZ_LT906453.1)          | 15.04        | 256097-256134                    | 1      | citrate synthase (CKV89_RS01045)                                      | 15                                                              |
| Eggerthella lenta DSM 2243<br>(NC_013204.1)                              | 15.58        | 1642309-1642246                  | -1     | XRE family transcriptional regulator<br>(ELEN_RS06870)                | 234                                                             |
|                                                                          | 15.47        | 3050747-3050800                  | 1      | hypothetical protein (ELEN_RS13155)                                   | 70                                                              |

| Organism<br>(Genome ID)                                                   | Bit<br>score | ANTAR-target RNA<br>co-ordinates | Strand | Annotation of the gene linked to<br>ANTAR-target RNAs<br>(Locus Tag) | Distance (nt) of RNA<br>from gene linked to<br>ANTAR-target RNA |
|---------------------------------------------------------------------------|--------------|----------------------------------|--------|----------------------------------------------------------------------|-----------------------------------------------------------------|
|                                                                           | 15.09        | 1311510-1311568                  | 1      | GGDEF domain-containing protein<br>(ELEN_RS05405)                    | 68                                                              |
| Eggerthella lenta strain C592<br>(NZ_CP021140.1)                          | 15.53        | 2885114-2885061                  | -1     | HNH endonuclease (CAB18_RS12525)                                     | 29                                                              |
|                                                                           | 15.09        | 2331573-2331515                  | -1     | GGDEF domain-containing protein<br>(CAB18_RS10165)                   | 68                                                              |
| Eggerthella sp. YY7918 DNA<br>(NC_015738.1)                               | 23.92        | 2403484-2403432                  | -1     | formate-dependent nitrite reductase<br>(EGYY_RS10130)                | 141                                                             |
|                                                                           | 18.25        | 898918-898968                    | 1      | FAD-binding protein (EGYY_RS03605)                                   | 408                                                             |
|                                                                           | 16.05        | 2989223-2989276                  | 1      | serine/threonine-protein phosphatase<br>(EGYY_RS12650)               | 11                                                              |
| Eggerthellaceae bacterium Marseille-<br>P3241 contig00001 (NZ_LT821227.1) | 17.89        | 813267-813313                    | 1      | hypothetical protein (B5449_RS03580)                                 | 28                                                              |
|                                                                           | 17.02        | 201358-201305                    | -1     | translation initiation factor IF-3<br>(B5449_RS00945)                | 98                                                              |
|                                                                           | 16.58        | 1387731-1387665                  | -1     | hypothetical protein (B5449_RS06055)                                 | 281                                                             |
| Frankia symbiont of Datisca<br>glomerata (NC_015656.1)                    | 16.08        | 3985397-3985335                  | -1     | ATPase (FSYMDG_RS16640)                                              | 17                                                              |
| Fronidhabitans sp. PAMC28766<br>(NZ_CP014513.1)                           | 22.62        | 1628207-1628135                  | -1     | Alpha-L-arabinofuranosidase<br>(AX769_RS07985)                       | 7                                                               |
|                                                                           | 19.17        | 4176083-4176027                  | -1     | alpha-L-arabinofuranosidase<br>(AX769_RS19925)                       | 7                                                               |
|                                                                           | 15.88        | 210467-210404                    | -1     | hypothetical protein (AX769_RS00955)                                 | 17                                                              |
|                                                                           | 15.34        | 1468942-1468876                  | -1     | nitronate monooxygenase<br>(AX769_RS07210)                           | 4                                                               |
| Gardnerella vaginalis ATCC 14018 =<br>JCM 11026 DNA (NZ_AP012332.1)       | 20.55        | 713559-713494                    | -1     | MFS transporter (GAVG_RS02705)                                       | 39                                                              |
|                                                                           | 17.78        | 852571-852627                    | 1      | elongation factor Ts (GAVG_RS03270)                                  | 58                                                              |
|                                                                           | 17.14        | 310381-310435                    | 1      | ATPase (GAVG_RS01165)                                                | 22                                                              |

| Organism<br>(Genome ID)                           | Bit<br>score | ANTAR-target RNA<br>co-ordinates | Strand | Annotation of the gene linked to<br>ANTAR-target RNAs<br>(Locus Tag)      | Distance (nt) of RNA<br>from gene linked to<br>ANTAR-target RNA |
|---------------------------------------------------|--------------|----------------------------------|--------|---------------------------------------------------------------------------|-----------------------------------------------------------------|
|                                                   | 16.71        | 84407-84463                      | 1      | LacI family transcriptional regulator<br>(GAVG_RS00345)                   | 107                                                             |
|                                                   | 16.53        | 1391978-1391921                  | -1     | hypothetical protein (GAVG_RS05255)                                       | 6                                                               |
|                                                   | 16.15        | 351111-351171                    | 1      | glycosyl transferase (GAVG_RS01325)                                       | 34                                                              |
| Gardnerella vaginalis ATCC 14019<br>(NC_014644.1) | 20.55        | 852666-852601                    | -1     | L-fucose permease<br>(HMPREF0421_20693)                                   | 39                                                              |
|                                                   | 17.78        | 991686-991742                    | 1      | elongation factor EF1B<br>(HMPREF0421_20808)                              | 58                                                              |
|                                                   | 17.14        | 449487-449541                    | 1      | ribulokinase (HMPREF0421_20372)                                           | 22                                                              |
|                                                   | 16.71        | 223569-223625                    | 1      | hypothetical protein<br>(HMPREF0421_20197)                                | 107                                                             |
|                                                   | 16.53        | 1531081-1531024                  | -1     | putative cytoplasmic protein<br>(HMPREF0421_21236)                        | 6                                                               |
|                                                   | 16.15        | 490215-490275                    | 1      | group 2 glycosyl transferase<br>(HMPREF0421_20405)                        | 34                                                              |
|                                                   | 15.95        | 1488885-1488834                  | -1     | ABC transporter ATP-binding protein<br>(HMPREF0421_21220)                 | 91                                                              |
| Gardnerella vaginalis HMP9231<br>(NC_017456.1)    | 20.55        | 1045532-1045597                  | 1      | MFS transporter<br>(HMPREF9231_RS04225)                                   | 39                                                              |
|                                                   | 17.78        | 909641-909585                    | -1     | elongation factor Ts<br>(HMPREF9231_RS03690)                              | 58                                                              |
|                                                   | 17.14        | 1437267-1437213                  | -1     | ATPase (HMPREF9231_RS05710)                                               | 22                                                              |
|                                                   | 16.71        | 86028-86084                      | 1      | LacI family DNA-binding transcriptional<br>regulator (HMPREF9231_RS00350) | 107                                                             |
|                                                   | 16.42        | 324254-324308                    | 1      | cytoplasmic protein<br>(HMPREF9231_RS01430)                               | 9                                                               |
|                                                   | 16.15        | 1396491-1396431                  | -1     | glycosyltransferase                                                       | 34                                                              |



| Organism<br>(Genome ID)                                             | Bit<br>score | ANTAR-target RNA<br>co-ordinates | Strand | Annotation of the gene linked to<br>ANTAR-target RNAs<br>(Locus Tag)                  | Distance (nt) of RNA<br>from gene linked to<br>ANTAR-target RNA |
|---------------------------------------------------------------------|--------------|----------------------------------|--------|---------------------------------------------------------------------------------------|-----------------------------------------------------------------|
|                                                                     |              |                                  |        | (HMPREF9231_RS05545)                                                                  |                                                                 |
| Glutamicibacter halophytocola strain<br>KLBMP 5180 (NZ_CP012750.1)  | 17.99        | 3057388-3057338                  | -1     | LacI family transcriptional regulator<br>(AOZ07_RS14130)                              | 13                                                              |
|                                                                     | 17.72        | 1968178-1968238                  | 1      | hypothetical protein (AOZ07_RS18180)                                                  | 23                                                              |
|                                                                     | 17.39        | 1820450-1820512                  | 1      | DNA-binding response regulator<br>(AOZ07_RS08370)                                     | 36                                                              |
|                                                                     | 17           | 2510824-2510880                  | 1      | hypothetical protein (AOZ07_RS11560)                                                  | 277                                                             |
|                                                                     | 15.02        | 2883212-2883156                  | -1     | spermidine/putrescine ABC transporter<br>substrate-binding protein<br>(AOZ07_RS13370) | 434                                                             |
| Gordonia bronchialis DSM 43247<br>(NC_013441.1)                     | 19.06        | 3539668-3539601                  | -1     | methyltransferase domain-containing<br>protein (GBRO_RS16465)                         | 181                                                             |
|                                                                     | 18.98        | 5147979-5147941                  | -1     | ammonium transporter (GBRO_RS23835)                                                   | 57                                                              |
|                                                                     | 16.24        | 1890303-1890247                  | -1     | aldehyde oxidase (GBRO_RS08895)                                                       | 33                                                              |
| Gordonia phthalatica strain QH-11<br>(NZ_CP011853.1)                | 19.34        | 1991447-1991503                  | 1      | DUF4193 domain-containing protein<br>(ACH46_RS09315)                                  | 70                                                              |
| Gordonia sp. KTR9 plasmid pGKT2<br>(NC_018580.1)                    | 15.28        | 9243-9187                        | -1     | hypothetical protein (KTR9_RS00050)                                                   | 7                                                               |
| Gordonia sp. KTR9 (NC_018581.1)                                     | 15.84        | 5108419-5108476                  | 1      | DUF2236 domain-containing protein<br>(KTR9_RS23580)                                   | 23                                                              |
|                                                                     | 15.42        | 5174857-5174799                  | -1     | hypothetical protein (KTR9_RS23900)                                                   | 11                                                              |
| Gordonibacter sp. Marseille-P2775<br>contig00001 (NZ_LT827128.1)    | 18.89        | 2127191-2127244                  | 1      | DNA-binding response regulator<br>(B6F40_RS08985)                                     | 79                                                              |
| Gordonibacter urolithinfaciens strain<br>DSM 27213T (NZ_LT900217.1) | 16.13        | 820786-820735                    | -1     | hypothetical protein (BN3560_RS03630)                                                 | 489                                                             |
|                                                                     | 15.77        | 2091859-2091910                  | 1      | co-chaperone GroES (BN3560_RS08960)                                                   | 35                                                              |
|                                                                     | 15.58        | 2055612-2055559                  | -1     | DNA-binding response regulator<br>(BN3560_RS08800)                                    | 79                                                              |

| Organism<br>(Genome ID)                                      | Bit<br>score | ANTAR-target RNA<br>co-ordinates | Strand | Annotation of the gene linked to<br>ANTAR-target RNAs<br>(Locus Tag)          | Distance (nt) of RNA<br>from gene linked to<br>ANTAR-target RNA |
|--------------------------------------------------------------|--------------|----------------------------------|--------|-------------------------------------------------------------------------------|-----------------------------------------------------------------|
| Hoyosella subflava DQS3-9A1<br>(NC_015564.1)                 | 31.41        | 4535832-4535773                  | -1     | DUF2236 domain-containing protein<br>(AS9A_RS21055)                           | 5                                                               |
|                                                              | 22.4         | 650876-650926                    | 1      | alpha/beta hydrolase (AS9A_RS02995)                                           | 188                                                             |
|                                                              | 15.5         | 932765-932832                    | 1      | lipid-transfer protein (AS9A_RS04405)                                         | 17                                                              |
| Intrasporangium calvum DSM 43043<br>(NC_014830.1)            | 16.22        | 22911-22856                      | -1     | hypothetical protein (INTCA_RS00110)                                          | 23                                                              |
| Janibacter indicus strain YFY001<br>(NZ_CP013290.1)          | 16.96        | 2789103-2789043                  | -1     | hypothetical protein (ASJ30_RS13585)                                          | 5                                                               |
| Jonesia denitrificans DSM 20603<br>(NC_013174.1)             | 16.56        | 2323554-2323610                  | 1      | arabinogalactan endo-1,4-beta-<br>galactosidase (JDEN_RS10685)                | 26                                                              |
|                                                              | 16.15        | 2592010-2592060                  | 1      | anti-sigma factor antagonist<br>(JDEN_RS12130)                                | 428                                                             |
|                                                              | 15.58        | 71727-71779                      | 1      | DeoR/GlpR transcriptional regulator<br>(JDEN_RS00320)                         | 13                                                              |
|                                                              | 15.25        | 558606-558552                    | -1     | sugar ABC transporter substrate-binding<br>protein (JDEN_RS02550)             | 96                                                              |
|                                                              | 15.14        | 144170-144235                    | 1      | energy-coupling factor ABC transporter<br>ATP-binding protein (JDEN_RS00660)  | 76                                                              |
| Jonesia denitrificans strain<br>FDAARGOS_301 (NZ_CP022038.1) | 16.56        | 1554067-1554011                  | -1     | arabinogalactan endo-1,4-beta-<br>galactosidase (CEP80_RS07685)               | 26                                                              |
|                                                              | 16.15        | 1246455-1246405                  | -1     | anti-sigma factor antagonist<br>(CEP80_RS05920)                               | 428                                                             |
|                                                              | 15.58        | 1017104-1017052                  | -1     | DeoR/GlpR transcriptional regulator<br>(CEP80_RS04895)                        | 13                                                              |
|                                                              | 15.25        | 530242-530296                    | 1      | sugar ABC transporter substrate-binding<br>protein (CEP80_RS02640)            | 96                                                              |
|                                                              | 15.14        | 944662-944597                    | -1     | energy-coupling factor ABC transporter<br>ATP-binding protein (CEP80_RS04550) | 76                                                              |

| Organism<br>(Genome ID)                                                     | Bit<br>score | ANTAR-target RNA<br>co-ordinates | Strand | Annotation of the gene linked to<br>ANTAR-target RNAs<br>(Locus Tag) | Distance (nt) of RNA<br>from gene linked to<br>ANTAR-target RNA |
|-----------------------------------------------------------------------------|--------------|----------------------------------|--------|----------------------------------------------------------------------|-----------------------------------------------------------------|
| Kitasatospora albolonga strain YIM<br>101047 (NZ_CP020563.1)                | 15.64        | 1997191-1997129                  | -1     | DUF3052 domain-containing protein<br>(B7C62_RS08665)                 | 82                                                              |
| Kitasatospora aureofaciens strain DM-<br>1 (NZ_CP020567.1)                  | 16.58        | 17269-17329                      | 1      | hypothetical protein (B6264_RS00060)                                 | 14                                                              |
|                                                                             | 16.54        | 651063-651111                    | 1      | sugar ABC transporter substrate-binding<br>protein (B6264_RS02840)   | 53                                                              |
|                                                                             | 15.47        | 6756365-6756418                  | 1      | MarR family transcriptional regulator<br>(B6264_RS29625)             | 449                                                             |
| Kitasatospora setae KM-6054 DNA<br>(NC_016109.1)                            | 15.36        | 778009-778069                    | 1      | carbohydrate-binding protein<br>(KSE_RS03350)                        | 186                                                             |
| Kocuria flava strain HO-9041<br>(NZ_CP013254.1)                             | 19.86        | 515543-515592                    | 1      | hypothetical protein (AS188_RS02400)                                 | 180                                                             |
| Kribbella flavida DSM 17836<br>(NC_013729.1)                                | 20.29        | 2485796-2485859                  | 1      | ricin B lectin (KFLA_RS11790)                                        | 53                                                              |
| Kutzneria albida DSM 43870<br>(NZ_CP007155.1)                               | 25.05        | 7090364-7090418                  | 1      | PucR family transcriptional regulator<br>(KALB_RS31050)              | 66                                                              |
| Lawsonella clevelandensis strain<br>X1698 (NZ_CP012390.1)                   | 25.41        | 604102-604046                    | -1     | 50S ribosomal protein L13<br>(AL705_RS02690)                         | 277                                                             |
|                                                                             | 15.58        | 1356990-1357058                  | 1      | DNA polymerase III subunit delta'<br>(AL705_RS05785)                 | 14                                                              |
| Leifsonia xyli strain SE134<br>(NZ_CP014761.1)                              | 30.35        | 2225649-2225592                  | -1     | hypothetical protein (A0130_RS10910)                                 | 12                                                              |
| Leifsonia xyli subsp. cynodontis DSM<br>46306 (NC_022438.1)                 | 19.15        | 1814548-1814589                  | 1      | sugar porter family MFS transporter<br>(O159_RS08685)                | 2                                                               |
| Lentzea guizhouensis strain DHS<br>C013 (NZ_CP016793.1)                     | 16.42        | 7916418-7916360                  | -1     | hypothetical protein (BBK82_RS38035)                                 | 156                                                             |
|                                                                             | 15.85        | 824349-824401                    | 1      | hypothetical protein (BBK82_RS48620)                                 | 17                                                              |
| Luteipulveratus mongoliensis strain<br>MN07-A0370 genome<br>(NZ_CP011112.1) | 16.66        | 3020465-3020530                  | 1      | 30S ribosomal protein S1<br>(VV02_RS14365)                           | 79                                                              |

| Organism<br>(Genome ID)                                   | Bit<br>score | ANTAR-target RNA<br>co-ordinates | Strand | Annotation of the gene linked to<br>ANTAR-target RNAs<br>(Locus Tag) | Distance (nt) of RNA<br>from gene linked to<br>ANTAR-target RNA |
|-----------------------------------------------------------|--------------|----------------------------------|--------|----------------------------------------------------------------------|-----------------------------------------------------------------|
| Microbacterium aurum strain KACC<br>15219 (NZ_CP018762.1) | 16.55        | 817552-817601                    | 1      | TetR/AcrR family transcriptional regulator<br>(BOH66_RS04080)        | 59                                                              |
|                                                           | 15.44        | 3112412-3112459                  | 1      | hypothetical protein (BOH66_RS14995)                                 | 0                                                               |
| Microbacterium paludicola strain CC3<br>(NZ_CP018134.1)   | 17.47        | 2473648-2473705                  | 1      | carbohydrate-binding protein<br>(BO218_RS11725)                      | 17                                                              |
|                                                           | 15.11        | 2373937-2373993                  | 1      | sugar ABC transporter substrate-binding<br>protein (BO218_RS11280)   | 4                                                               |
| Microbacterium sp. 1.5R<br>(NZ_CP018151.1)                | 18.61        | 1648165-1648105                  | -1     | glycerol kinase (BMW26_RS07710)                                      | 9                                                               |
|                                                           | 16.89        | 3238250-3238196                  | -1     | sugar ABC transporter substrate-binding<br>protein (BMW26_RS15470)   | 26                                                              |
|                                                           | 15.68        | 3018889-3018838                  | -1     | hypothetical protein (BMW26_RS14505)                                 | 33                                                              |
| Microbacterium sp. BH-3-3-3<br>(NZ_CP017674.1)            | 15.95        | 3091177-3091233                  | 1      | DUF485 domain-containing protein<br>(BJP65_RS14290)                  | 7                                                               |
|                                                           | 15.89        | 2563384-2563433                  | 1      | LacI family DNA-binding transcriptional<br>regulator (BJP65_RS11740) | 31                                                              |
| Microbacterium sp. CGR1<br>(NZ_CP012299.1)                | 18.61        | 661170-661110                    | -1     | aquaporin family protein<br>(AKG07_RS03080)                          | 9                                                               |
|                                                           | 16.89        | 2218112-2218058                  | -1     | sugar ABC transporter substrate-binding<br>protein (AKG07_RS10695)   | 26                                                              |
| Microbacterium sp. PAMC 28756<br>(NZ_CP014313.1)          | 17.56        | 1226223-1226163                  | -1     | hypothetical protein (AXH82_RS05985)                                 | 17                                                              |
| Microbacterium sp. TPU 3598 DNA<br>(NZ_AP017975.1)        | 18.1         | 1202932-1202999                  | 1      | hypothetical protein (MST3598_RS05635)                               | 45                                                              |
|                                                           | 16.19        | 3509660-3509602                  | -1     | sugar ABC transporter ATP-binding<br>protein (MST3598_RS16730)       | 17                                                              |
| Microbacterium sp. XT11<br>(NZ_CP013859.1)                | 17.63        | 1072688-1072639                  | -1     | ABC transporter substrate-binding protein<br>(AB663_RS05085)         | 5                                                               |
|                                                           | 15.67        | 175856-175802                    | -1     | maltose ABC transporter substrate-binding                            | 39                                                              |

| Organism<br>(Genome ID)                                        | Bit<br>score | ANTAR-target RNA<br>co-ordinates | Strand | Annotation of the gene linked to<br>ANTAR-target RNAs<br>(Locus Tag)   | Distance (nt) of RNA<br>from gene linked to<br>ANTAR-target RNA |
|----------------------------------------------------------------|--------------|----------------------------------|--------|------------------------------------------------------------------------|-----------------------------------------------------------------|
|                                                                |              |                                  |        | protein (AB663_RS00910)                                                |                                                                 |
| Microbacterium testaceum StLB037<br>DNA (NC_015125.1)          | 18.6         | 3169543-3169487                  | -1     | transcriptional regulator<br>(MTES_RS14400)                            | 138                                                             |
| Microterricola viridarii strain<br>ERGS5:02 (NZ_CP014145.1)    | 17.93        | 3382572-3382517                  | -1     | sugar phosphate isomerase/epimerase<br>(AWU67_RS15480)                 | 17                                                              |
|                                                                | 17.44        | 2717332-2717386                  | 1      | hypothetical protein (AWU67_RS12465)                                   | 2                                                               |
|                                                                | 17.29        | 15867-15801                      | -1     | GntR family transcriptional regulator<br>(AWU67_RS00070)               | 214                                                             |
|                                                                | 15.34        | 2872238-2872189                  | -1     | FAD-dependent oxidoreductase<br>(AWU67_RS13115)                        | 8                                                               |
|                                                                | 15.3         | 710315-710365                    | 1      | hypothetical protein (AWU67_RS03160)                                   | 266                                                             |
| Mobiluncus curtisii ATCC 43063<br>(NC_014246.1)                | 20.99        | 26853-26799                      | -1     | succinate-semialdehyde dehydrogenase<br>(NADP(+)) (HMPREF0573_RS00115) | 5                                                               |
|                                                                | 16.49        | 1518925-1518981                  | 1      | 50S ribosomal protein L19<br>(HMPREF0573_RS06470)                      | 48                                                              |
|                                                                | 15.62        | 765509-765457                    | -1     | hypothetical protein<br>(HMPREF0573_RS03280)                           | 37                                                              |
|                                                                | 15.54        | 1880212-1880265                  | 1      | response regulator<br>(HMPREF0573_RS08165)                             | 94                                                              |
| Mycobacterium abscessus<br>(NC_010397.1)                       | 15.93        | 1789584-1789640                  | 1      | Bacteriophage protein (MAB_1787)                                       | 81                                                              |
| Mycobacterium abscessus strain<br>FLAC005 (NZ_CP014952.1)      | 17.3         | 3098053-3097993                  | -1     | malate:quinone oxidoreductase<br>(A3N97_RS15190)                       | 311                                                             |
| Mycobacterium abscessus strain<br>FLAC013 (NZ_CP014955.1)      | 15.93        | 1772773-1772829                  | 1      | hypothetical protein (A3O00_RS08870)                                   | 81                                                              |
| Mycobacterium abscessus subsp.<br>bolletii 103 (NZ_CP009407.1) | 15.93        | 1774108-1774164                  | 1      | hypothetical protein (LA61_RS08890)                                    | 81                                                              |

| Organism<br>(Genome ID)                                                                               | Bit<br>score | ANTAR-target RNA<br>co-ordinates | Strand | Annotation of the gene linked to<br>ANTAR-target RNAs<br>(Locus Tag) | Distance (nt) of RNA<br>from gene linked to<br>ANTAR-target RNA |
|-------------------------------------------------------------------------------------------------------|--------------|----------------------------------|--------|----------------------------------------------------------------------|-----------------------------------------------------------------|
| Mycobacterium abscessus subsp.<br>bolletii 50594 plasmid 2<br>(NC_021279.1)                           | 16.96        | 64917-64969                      | 1      | hypothetical protein (MASS_RS26665)                                  | 100                                                             |
| Mycobacterium abscessus subsp.<br>bolletii strain MA 1948<br>(NZ_CP009408.1)                          | 15.93        | 1789073-1789129                  | 1      | hypothetical protein (LA62_RS08980)                                  | 81                                                              |
| Mycobacterium abscessus subsp.<br>bolletii strain MC1518<br>(NZ_CP009613.1)                           | 15.93        | 1781082-1781138                  | 1      | hypothetical protein (NF82_RS08935)                                  | 81                                                              |
| Mycobacterium africanum GM041182<br>complete genome (NC_015758.1)                                     | 24.77        | 2187796-2187846                  | 1      | monooxygenase (MAF_RS10120)                                          | 73                                                              |
|                                                                                                       | 16.73        | 183316-183369                    | 1      | NAD(P) transhydrogenase subunit beta<br>(MAF_RS00845)                | 36                                                              |
| Mycobacterium avium subsp.<br>paratuberculosis MAP4<br>(NC_021200.1)                                  | 15.81        | 2321644-2321703                  | 1      | TetR family transcriptional regulator<br>(MAP4_RS10515)              | 102                                                             |
| Mycobacterium avium subsp.<br>paratuberculosis str. k10<br>(NC_002944.2)                              | 15.81        | 1887618-1887559                  | -1     | TetR family transcriptional regulator<br>(MAP_RS08785)               | 102                                                             |
| Mycobacterium avium subsp.<br>paratuberculosis strain E1<br>(NZ_CP010113.1)                           | 15.81        | 2295420-2295479                  | 1      | TetR family transcriptional regulator<br>(RC58_RS10490)              | 102                                                             |
| Mycobacterium avium subsp.<br>paratuberculosis strain E93<br>(NZ_CP010114.1)                          | 15.81        | 2298051-2298110                  | 1      | TetR family transcriptional regulator<br>(RE97_RS10500)              | 102                                                             |
| Mycobacterium avium subsp.<br>paratuberculosis strain<br>MAP/TANUVAS/TN/India/2008<br>(NZ_CP015495.1) | 15.81        | 1887618-1887559                  | -1     | TetR family transcriptional regulator<br>(A0V42_RS08815)             | 102                                                             |
| Mycobacterium bovis BCG Pasteur                                                                       | 24.77        | 2189421-2189471                  | 1      | monooxygenase (BCG_RS10150)                                          | 73                                                              |

| Organism<br>(Genome ID)                                                       | Bit<br>score | ANTAR-target RNA<br>co-ordinates | Strand | Annotation of the gene linked to<br>ANTAR-target RNAs<br>(Locus Tag) | Distance (nt) of RNA<br>from gene linked to<br>ANTAR-target RNA |
|-------------------------------------------------------------------------------|--------------|----------------------------------|--------|----------------------------------------------------------------------|-----------------------------------------------------------------|
| 1173P2 (NC_008769.1)                                                          | 16.73        | 214866-214919                    | 1      | NAD(P) transhydrogenase subunit beta<br>(BCG_RS01000)                | 36                                                              |
| Mycobacterium bovis BCG str. ATCC<br>35743 (NZ_CP003494.1)                    | 24.77        | 1889021-1889071                  | 1      | monooxygenase (BCGT_RS08920)                                         | 73                                                              |
|                                                                               | 16.73        | 4234506-4234559                  | 1      | NAD(P) transhydrogenase subunit beta<br>(BCGT_RS19940)               | 36                                                              |
| Mycobacterium bovis BCG str. Korea<br>1168P (NC_020245.2)                     | 24.77        | 2159066-2159116                  | 1      | monooxygenase (K60_RS09975)                                          | 73                                                              |
|                                                                               | 16.73        | 185199-185252                    | 1      | NAD(P) transhydrogenase subunit beta<br>(K60_RS00840)                | 36                                                              |
| Mycobacterium bovis BCG str. Mexico<br>(NC_016804.1)                          | 24.77        | 2168786-2168836                  | 1      | monooxygenase (BCGMEX_RS10025)                                       | 73                                                              |
|                                                                               | 16.73        | 185199-185252                    | 1      | NAD(P) transhydrogenase subunit beta<br>(BCGMEX_RS00840)             | 36                                                              |
| Mycobacterium bovis BCG str.<br>Moreau RDJ complete genome<br>(NZ_AM412059.1) | 24.77        | 2171338-2171388                  | 1      | monooxygenase (BCGM_RS10045)                                         | 73                                                              |
|                                                                               | 16.73        | 185193-185246                    | 1      | NAD(P) transhydrogenase subunit beta<br>(BCGM_RS00835)               | 36                                                              |
| Mycobacterium bovis BCG str. Tokyo<br>172 DNA (NC_012207.1)                   | 24.77        | 2171412-2171462                  | 1      | monooxygenase (JTY_RS10050)                                          | 73                                                              |
|                                                                               | 16.73        | 185199-185252                    | 1      | NAD(P) transhydrogenase subunit beta<br>(JTY_RS00845)                | 36                                                              |
| Mycobacterium bovis BCG str. Tokyo<br>172 substrain TRCS<br>(NZ_CP014566.1)   | 24.77        | 2171410-2171460                  | 1      | monooxygenase (AZH48_RS10030)                                        | 73                                                              |
|                                                                               | 16.73        | 185199-185252                    | 1      | NAD(P) transhydrogenase subunit beta<br>(AZH48_RS00835)              | 36                                                              |
| Mycobacterium bovis BCG strain<br>3281 (NZ_CP008744.1)                        | 24.77        | 2169564-2169614                  | 1      | monooxygenase (GS11_RS10040)                                         | 73                                                              |
|                                                                               | 16.73        | 185198-185251                    | 1      | NAD(P) transhydrogenase subunit beta<br>(GS11_RS00840)               | 36                                                              |
| Mycobacterium bovis BCG strain<br>Russia 368 (NZ_CP009243.1)                  | 24.77        | 2171415-2171465                  | 1      | monooxygenase (BCGR_RS10045)                                         | 73                                                              |
|                                                                               | 16.73        | 185196-185249                    | 1      | NAD(P) transhydrogenase subunit beta<br>(BCGR_RS00835)               | 36                                                              |

| Organism<br>(Genome ID)                                                   | Bit<br>score | ANTAR-target RNA<br>co-ordinates | Strand | Annotation of the gene linked to<br>ANTAR-target RNAs<br>(Locus Tag) | Distance (nt) of RNA<br>from gene linked to<br>ANTAR-target RNA |
|---------------------------------------------------------------------------|--------------|----------------------------------|--------|----------------------------------------------------------------------|-----------------------------------------------------------------|
| Mycobacterium bovis strain 1595<br>(NZ_CP012095.1)                        | 24.77        | 2183860-2183910                  | 1      | monooxygenase (Mb1595_RS10130)                                       | 73                                                              |
|                                                                           | 16.73        | 185167-185220                    | 1      | NAD(P) transhydrogenase subunit beta<br>(Mb1595_RS00840)             | 36                                                              |
| Mycobacterium bovis strain ATCC<br>BAA-935 (NZ_CP009449.1)                | 24.77        | 2147621-2147671                  | 1      | monooxygenase (LH58_RS10065)                                         | 73                                                              |
|                                                                           | 16.73        | 184747-184800                    | 1      | NAD(P) transhydrogenase subunit beta<br>(LH58_RS00850)               | 36                                                              |
| Mycobacterium bovis strain BCG-1<br>(Russia) (NZ_CP013741.1)              | 24.77        | 2171711-2171761                  | 1      | monooxygenase (BOVR_RS10050)                                         | 73                                                              |
|                                                                           | 16.73        | 185196-185249                    | 1      | NAD(P) transhydrogenase subunit beta<br>(BOVR_RS00835)               | 36                                                              |
| Mycobacterium bovis strain SP38<br>(NZ_CP015773.1)                        | 24.31        | 1085783-1085833                  | 1      | monooxygenase (SZ58_RS04940)                                         | 73                                                              |
|                                                                           | 16.73        | 3435305-3435358                  | 1      | NAD(P) transhydrogenase subunit beta<br>(SZ58_RS15965)               | 36                                                              |
| Mycobacterium canettii CIPT<br>140010059 complete genome<br>(NC_015848.1) | 16.73        | 191637-191690                    | 1      | NAD(P) transhydrogenase subunit beta<br>(MCAN_RS00870)               | 36                                                              |
| Mycobacterium chelonae CCUG<br>47445 (NZ_CP007220.1)                      | 15.61        | 1991172-1991122                  | -1     | leucyl aminopeptidase (BB28_RS09875)                                 | 335                                                             |
| Mycobacterium chubuense NBB4<br>(NC_018027.1)                             | 15.84        | 2664513-2664572                  | 1      | 30S ribosomal protein S1<br>(MYCCH_RS12620)                          | 91                                                              |
| Mycobacterium fortuitum strain CT6<br>(NZ_CP011269.1)                     | 20.51        | 6251576-6251522                  | -1     | 16S rRNA methyltransferase G<br>(XA26_RS29760)                       | 7                                                               |
|                                                                           | 19.98        | 4166635-4166579                  | -1     | hypothetical protein (XA26_RS19840)                                  | 43                                                              |
|                                                                           | 19.55        | 3804230-3804294                  | 1      | hypothetical protein (XA26_RS18215)                                  | 17                                                              |
|                                                                           | 16.6         | 3617008-3616949                  | -1     | 30S ribosomal protein S1<br>(XA26_RS17315)                           | 91                                                              |
|                                                                           | 15.11        | 444284-444224                    | -1     | MFS transporter (XA26_RS02045)                                       | 72                                                              |
| Mycobacterium gilvum PYR-GCK                                              | 22.54        | 1209116-1209171                  | 1      | esterase/ diacyl-glycerol transferase                                | 60                                                              |



| Organism<br>(Genome ID)                                                     | Bit<br>score | ANTAR-target RNA<br>co-ordinates | Strand | Annotation of the gene linked to<br>ANTAR-target RNAs<br>(Locus Tag) | Distance (nt) of RNA<br>from gene linked to<br>ANTAR-target RNA |
|-----------------------------------------------------------------------------|--------------|----------------------------------|--------|----------------------------------------------------------------------|-----------------------------------------------------------------|
| (NC_009338.1)                                                               |              |                                  |        | (MFLV_RS05805)                                                       |                                                                 |
|                                                                             | 17.57        | 4909773-4909724                  | -1     | acyl-CoA dehydrogenase<br>(MFLV_RS23155)                             | 23                                                              |
|                                                                             | 16.29        | 4195679-4195623                  | -1     | dUTPase (MFLV_RS19775)                                               | 70                                                              |
|                                                                             | 16.22        | 3798413-3798354                  | -1     | 30S ribosomal protein S1<br>(MFLV_RS17880)                           | 91                                                              |
| Mycobacterium gilvum Spyr1<br>(NC_014814.1)                                 | 22.54        | 5213367-5213312                  | -1     | hypothetical protein (MSPYR1_RS24685)                                | 60                                                              |
|                                                                             | 16.29        | 3405359-3405303                  | -1     | dUTPase (MSPYR1_RS16135)                                             | 70                                                              |
|                                                                             | 16.22        | 3014743-3014684                  | -1     | 30S ribosomal protein S1<br>(MSPYR1_RS14285)                         | 91                                                              |
|                                                                             | 15.78        | 3577814-3577873                  | 1      | aldehyde dehydrogenase<br>(MSPYR1_RS17045)                           | 40                                                              |
| Mycobacterium goodii strain X7B<br>(NZ_CP012150.1)                          | 16.25        | 5969358-5969296                  | -1     | SAM-dependent methyltransferase<br>(AFA91_RS27860)                   | 99                                                              |
| Mycobacterium haemophilum DSM<br>44634 strain ATCC 29548<br>(NZ_CP011883.2) | 16.19        | 408604-408663                    | 1      | hypothetical protein (B586_RS01890)                                  | 13                                                              |
|                                                                             | 15.56        | 1112421-1112495                  | 1      | hypothetical protein (B586_RS05315)                                  | 161                                                             |
| Mycobacterium immunogenum strain<br>CCUG 47286 (NZ_CP011530.1)              | 17.47        | 4394659-4394597                  | -1     | AsnC family transcriptional regulator<br>(ABG82_RS21770)             | 389                                                             |
|                                                                             | 15.18        | 3148105-3148046                  | -1     | transketolase (ABG82_RS15345)                                        | 2                                                               |
| Mycobacterium liflandii 128FXT<br>(NC_020133.1)                             | 20.47        | 3552989-3553040                  | 1      | hypothetical protein (MULP_RS15355)                                  | 70                                                              |
|                                                                             | 16.46        | 2276480-2276530                  | 1      | hypothetical protein (MULP_RS09850)                                  | 7                                                               |
|                                                                             | 15.34        | 3623588-3623652                  | 1      | TetR family transcriptional regulator<br>(MULP_RS15640)              | 85                                                              |
| Mycobacterium marinum E11 main<br>genome (NZ_HG917972.2)                    | 20.47        | 2705668-2705617                  | -1     | hypothetical protein<br>(MMARE11_RS11245)                            | 70                                                              |
|                                                                             | 16.54        | 2228845-2228895                  | 1      | hypothetical protein                                                 | 7                                                               |

| Organism<br>(Genome ID)                                                 | Bit<br>score | ANTAR-target RNA<br>co-ordinates | Strand | Annotation of the gene linked to<br>ANTAR-target RNAs<br>(Locus Tag)      | Distance (nt) of RNA<br>from gene linked to<br>ANTAR-target RNA |
|-------------------------------------------------------------------------|--------------|----------------------------------|--------|---------------------------------------------------------------------------|-----------------------------------------------------------------|
|                                                                         |              |                                  |        | (MMARE11_RS09125)                                                         |                                                                 |
|                                                                         | 15.34        | 2608576-2608512                  | -1     | TetR family transcriptional regulator<br>(MMARE11_RS10875)                | 85                                                              |
| Mycobacterium marinum M<br>(NC_010612.1)                                | 20.47        | 2842763-2842712                  | -1     | hypothetical protein (MMAR_RS11735)                                       | 70                                                              |
|                                                                         | 16.46        | 2346618-2346668                  | 1      | hypothetical protein (MMAR_RS09565)                                       | 7                                                               |
|                                                                         | 15.34        | 2745480-2745416                  | -1     | TetR family transcriptional regulator<br>(MMAR_RS11360)                   | 85                                                              |
| Mycobacterium neoaurum VKM Ac-<br>1815D (NC_023036.2)                   | 16.66        | 4181172-4181233                  | 1      | hypothetical protein (D174_RS19485)                                       | 63                                                              |
|                                                                         | 15.99        | 4248495-4248433                  | -1     | F0F1 ATP synthase subunit C<br>(D174_RS19810)                             | 17                                                              |
| Mycobacterium phlei strain CCUG<br>21000 (NZ_CP014475.1)                | 16.65        | 3983075-3983127                  | 1      | DNA-3-methyladenine glycosylase<br>(MPHLCCUG_RS19105)                     | 16                                                              |
|                                                                         | 16.6         | 2811559-2811500                  | -1     | 30S ribosomal protein S1<br>(MPHLCCUG_RS13480)                            | 91                                                              |
| Mycobacterium rhodesiae NBB3<br>(NC_016604.1)                           | 16.99        | 4624964-4625023                  | 1      | 30S ribosomal protein S1<br>(MYCRHN_RS22435)                              | 91                                                              |
|                                                                         | 16.97        | 761121-761068                    | -1     | DNA-directed RNA polymerase subunit<br>beta' (MYCRHN_RS03650)             | 141                                                             |
| Mycobacterium smegmatis genome<br>assembly NCTC81591<br>(NZ_LN831039.1) | 16.41        | 3141723-3141672                  | -1     | 2,5-dichloro-2,5-cyclohexadiene-1,4-diol<br>dehydrogenase (AT701_RS15105) | 36                                                              |
| Mycobacterium smegmatis JS623<br>plasmid pMYCSM02 (NC_019958.1)         | 17.87        | 29809-29757                      | -1     | hypothetical protein (MYCSM_RS33235)                                      | 385                                                             |
| Mycobacterium smegmatis JS623<br>(NC_019966.1)                          | 17.36        | 2977710-2977769                  | 1      | 30S ribosomal protein S1<br>(MYCSM_RS14600)                               | 91                                                              |
|                                                                         | 15.17        | 21645-21589                      | -1     | serine/threonine protein kinase<br>(MYCSM_RS00115)                        | 30                                                              |

| Organism<br>(Genome ID)                                 | Bit<br>score | ANTAR-target RNA<br>co-ordinates | Strand | Annotation of the gene linked to<br>ANTAR-target RNAs<br>(Locus Tag)      | Distance (nt) of RNA<br>from gene linked to<br>ANTAR-target RNA |
|---------------------------------------------------------|--------------|----------------------------------|--------|---------------------------------------------------------------------------|-----------------------------------------------------------------|
| Mycobacterium smegmatis str. MC2<br>155 (NC_008596.1)   | 16.41        | 3078808-3078757                  | -1     | 2,5-dichloro-2,5-cyclohexadiene-1,4-diol<br>dehydrogenase (MSMEG_3009)    | 36                                                              |
| Mycobacterium smegmatis str. MC2<br>155 (NC_018289.1)   | 16.41        | 3080422-3080371                  | -1     | 2,5-dichloro-2,5-cyclohexadiene-1,4-diol<br>dehydrogenase (MSMEI_RS14815) | 36                                                              |
| Mycobacterium smegmatis str. MC2<br>155 (NZ_CP009494.1) | 16.41        | 3078853-3078802                  | -1     | 2,5-dichloro-2,5-cyclohexadiene-1,4-diol<br>dehydrogenase (LJ00_RS14800)  | 36                                                              |
| Mycobacterium smegmatis strain<br>INHR1 (NZ_CP009495.1) | 16.41        | 3078887-3078836                  | -1     | 2,5-dichloro-2,5-cyclohexadiene-1,4-diol<br>dehydrogenase (LI99_RS14800)  | 36                                                              |
| Mycobacterium smegmatis strain<br>INHR2 (NZ_CP009496.1) | 16.41        | 3078875-3078824                  | -1     | 2,5-dichloro-2,5-cyclohexadiene-1,4-diol<br>dehydrogenase (LI98_RS14795)  | 36                                                              |
| Mycobacterium sp. EPa45<br>(NZ_CP011773.1)              | 17.68        | 3780340-3780281                  | -1     | 30S ribosomal protein S1<br>(AB431_RS18105)                               | 91                                                              |
|                                                         | 16.35        | 4094521-4094465                  | -1     | hypothetical protein (AB431_RS19610)                                      | 87                                                              |
|                                                         | 16.22        | 572894-572950                    | 1      | hypothetical protein (AB431_RS02575)                                      | 88                                                              |
|                                                         | 15.06        | 5271360-5271312                  | -1     | aminoglycoside phosphotransferase<br>(AB431_RS24895)                      | 3                                                               |
| Mycobacterium sp. JLS<br>(NC_009077.1)                  | 19.01        | 2700344-2700396                  | 1      | ATPase AAA (MJLS_RS12880)                                                 | 9                                                               |
|                                                         | 16.1         | 3939077-3939026                  | -1     | (2Fe-2S)-binding protein<br>(MJLS_RS18635)                                | 133                                                             |
|                                                         | 15.84        | 3157092-3157033                  | -1     | 30S ribosomal protein S1<br>(MJLS_RS15115)                                | 91                                                              |
|                                                         | 15.78        | 1201711-1201770                  | 1      | HAD family hydrolase (MJLS_RS05610)                                       | 7                                                               |
|                                                         | 15.33        | 1406291-1406347                  | 1      | alpha/beta hydrolase (MJLS_RS06560)                                       | 11                                                              |
| Mycobacterium sp. KMS<br>(NC_008705.1)                  | 19.01        | 2714603-2714655                  | 1      | ATPase AAA (MKMS_RS12840)                                                 | 9                                                               |
|                                                         | 15.84        | 3195040-3194981                  | -1     | 30S ribosomal protein S1<br>(MKMS_RS15200)                                | 91                                                              |
|                                                         | 15.78        | 1198153-1198212                  | 1      | hypothetical protein (MKMS_RS05525)                                       | 7                                                               |

| Organism<br>(Genome ID)                                             | Bit<br>score | ANTAR-target RNA<br>co-ordinates | Strand | Annotation of the gene linked to<br>ANTAR-target RNAs<br>(Locus Tag) | Distance (nt) of RNA<br>from gene linked to<br>ANTAR-target RNA |
|---------------------------------------------------------------------|--------------|----------------------------------|--------|----------------------------------------------------------------------|-----------------------------------------------------------------|
| Mycobacterium sp. MCS<br>(NC_008146.1)                              | 19.01        | 2696715-2696767                  | 1      | ATPase AAA (MMCS_RS12745)                                            | 9                                                               |
|                                                                     | 15.84        | 3177152-3177093                  | -1     | 30S ribosomal protein S1<br>(MMCS_RS15105)                           | 91                                                              |
|                                                                     | 15.78        | 1193844-1193903                  | 1      | hypothetical protein (MMCS_RS05500)                                  | 7                                                               |
| Mycobacterium sp. NRRL B-3805<br>(NZ_CP011022.1)                    | 16.66        | 4181243-4181304                  | 1      | hypothetical protein (MyAD_RS19495)                                  | 63                                                              |
|                                                                     | 15.99        | 4248566-4248504                  | -1     | F0F1 ATP synthase subunit C<br>(MyAD_RS19820)                        | 17                                                              |
| Mycobacterium sp. QIA-37<br>(NZ_CP010071.1)                         | 18.38        | 1151605-1151667                  | 1      | cytochrome (Cheloniae_RS05625)                                       | 91                                                              |
| Mycobacterium sp. VKM Ac-1817D<br>(NZ_CP009914.1)                   | 20.51        | 6321182-6321128                  | -1     | 16S rRNA methyltransferase G<br>(G155_RS30185)                       | 7                                                               |
|                                                                     | 18.79        | 5424084-5424140                  | 1      | hypothetical protein (G155_RS25930)                                  | 64                                                              |
|                                                                     | 16.6         | 3626181-3626122                  | -1     | 30S ribosomal protein S1<br>(G155_RS17390)                           | 91                                                              |
|                                                                     | 15.11        | 515037-514977                    | -1     | MFS transporter (G155_RS02340)                                       | 72                                                              |
| Mycobacterium tuberculosis 49-02<br>complete genome (NZ_HG813240.1) | 24.77        | 2173566-2173616                  | 1      | alkane 1-monooxygenase<br>(MT49_RS10070)                             | 73                                                              |
|                                                                     | 16.73        | 183230-183283                    | 1      | NAD(P) transhydrogenase subunit beta<br>(MT49_RS00840)               | 36                                                              |
| Mycobacterium tuberculosis 7199-99<br>complete genome (NC_020089.1) | 24.77        | 2191699-2191749                  | 1      | monooxygenase (MT7199_RS10100)                                       | 73                                                              |
|                                                                     | 16.73        | 185188-185241                    | 1      | NAD(P) transhydrogenase subunit beta<br>(MT7199_RS00840)             | 36                                                              |
| Mycobacterium tuberculosis BT1<br>(NZ_CP002883.1)                   | 24.77        | 2173137-2173187                  | 1      | alkane 1-monooxygenase<br>(HKBT1_RS10085)                            | 73                                                              |
|                                                                     | 16.73        | 183287-183340                    | 1      | NAD(P) transhydrogenase subunit beta<br>(HKBT1_RS00840)              | 36                                                              |
| Mycobacterium tuberculosis BT2                                      | 24.77        | 2166350-2166400                  | 1      | alkane 1-monooxygenase                                               | 73                                                              |

| Organism<br>(Genome ID)                                  | Bit<br>score | ANTAR-target RNA<br>co-ordinates | Strand | Annotation of the gene linked to<br>ANTAR-target RNAs<br>(Locus Tag) | Distance (nt) of RNA<br>from gene linked to<br>ANTAR-target RNA |
|----------------------------------------------------------|--------------|----------------------------------|--------|----------------------------------------------------------------------|-----------------------------------------------------------------|
| (NZ_CP002882.1)                                          |              |                                  |        | (HKBT2_RS10060)                                                      |                                                                 |
|                                                          | 16.73        | 183286-183339                    | 1      | NAD(P) transhydrogenase subunit beta<br>(HKBT2_RS00840)              | 36                                                              |
| Mycobacterium tuberculosis<br>CCDC5079 (NC_021251.1)     | 20.33        | 2174956-2175006                  | 1      | alkane 1-monooxygenase<br>(CFBS_RS10115)                             | 73                                                              |
|                                                          | 16.73        | 183231-183284                    | 1      | NAD(P) transhydrogenase subunit beta<br>(CFBS_RS00840)               | 36                                                              |
| Mycobacterium tuberculosis<br>CCDC5180 (NC_017522.1)     | 24.77        | 2168763-2168813                  | 1      | alkane 1-monooxygenase<br>(CCDC5180_RS10115)                         | 73                                                              |
|                                                          | 16.73        | 183230-183283                    | 1      | NAD(P) transhydrogenase subunit beta<br>(CCDC5180_RS00840)           | 36                                                              |
| Mycobacterium tuberculosis<br>CCDC5180 (NZ_CP002885.1)   | 24.77        | 2173333-2173383                  | 1      | alkane 1-monooxygenase<br>(CFBR_RS10085)                             | 73                                                              |
|                                                          | 16.73        | 183230-183283                    | 1      | NAD(P) transhydrogenase subunit beta<br>(CFBR_RS00840)               | 36                                                              |
| Mycobacterium tuberculosis<br>CDC1551 (NC_002755.2)      | 16.73        | 185137-185190                    | 1      | NAD(P) transhydrogenase subunit beta<br>(MT_RS00840)                 | 36                                                              |
|                                                          | 15.69        | 2184593-2184643                  | 1      | monooxygenase (MT_RS10100)                                           | 73                                                              |
| Mycobacterium tuberculosis CTRI-2<br>(NC_017524.1)       | 24.77        | 2180824-2180874                  | 1      | monooxygenase (MTCTRI2_RS10125)                                      | 73                                                              |
|                                                          | 16.73        | 184725-184778                    | 1      | NAD(P) transhydrogenase subunit beta<br>(MTCTRI2_RS00845)            | 36                                                              |
| Mycobacterium tuberculosis EAI5<br>(NC_021740.1)         | 24.77        | 2181844-2181894                  | 1      | monooxygenase (M943_RS10115)                                         | 73                                                              |
|                                                          | 16.73        | 184973-185026                    | 1      | NAD(P) transhydrogenase subunit beta<br>(M943_RS00845)               | 36                                                              |
| Mycobacterium tuberculosis<br>EAI5/NITR206 (NC_021194.1) | 24.77        | 2181480-2181530                  | 1      | monooxygenase (J114_RS10135)                                         | 73                                                              |

| Organism<br>(Genome ID)                                  | Bit<br>score | ANTAR-target RNA<br>co-ordinates | Strand | Annotation of the gene linked to<br>ANTAR-target RNAs<br>(Locus Tag) | Distance (nt) of RNA<br>from gene linked to<br>ANTAR-target RNA |
|----------------------------------------------------------|--------------|----------------------------------|--------|----------------------------------------------------------------------|-----------------------------------------------------------------|
| Mycobacterium tuberculosis F11<br>(NC_009565.1)          | 24.77        | 2195516-2195566                  | 1      | monooxygenase (TBFG_RS10180)                                         | 73                                                              |
|                                                          | 16.73        | 185285-185338                    | 1      | NAD(P) transhydrogenase subunit beta<br>(TBFG_RS00840)               | 36                                                              |
| Mycobacterium tuberculosis H37Ra<br>(NC_009525.1)        | 24.77        | 2197160-2197210                  | 1      | monooxygenase (MRA_RS10230)                                          | 73                                                              |
|                                                          | 16.73        | 186329-186382                    | 1      | NAD(P) transhydrogenase subunit beta<br>(MRA_RS00855)                | 36                                                              |
| Mycobacterium tuberculosis H37Rv<br>(NC_000962.3)        | 24.77        | 2187261-2187311                  | 1      | monooxygenase (Rv1936)                                               | 73                                                              |
|                                                          | 16.73        | 184969-185022                    | 1      | NAD(P) transhydrogenase subunit beta<br>PntB (Rv0157)                | 30                                                              |
| Mycobacterium tuberculosis H37Rv<br>(NC_018143.2)        | 24.77        | 2187268-2187318                  | 1      | monooxygenase (RVBD_RS10160)                                         | 73                                                              |
|                                                          | 16.73        | 184967-185020                    | 1      | NAD(P) transhydrogenase subunit beta<br>(RVBD_RS00840)               | 36                                                              |
| Mycobacterium tuberculosis H37Rv<br>(NZ_CP009480.1)      | 24.77        | 2182565-2182615                  | 1      | monooxygenase (LH57_RS10210)                                         | 73                                                              |
|                                                          | 16.73        | 184815-184868                    | 1      | NAD(P) transhydrogenase subunit beta<br>(LH57_RS00845)               | 36                                                              |
| Mycobacterium tuberculosis<br>H37RvSiena (NZ_CP007027.1) | 24.77        | 2186649-2186699                  | 1      | monooxygenase (Y980_RS10165)                                         | 73                                                              |
|                                                          | 16.73        | 184967-185020                    | 1      | NAD(P) transhydrogenase subunit beta<br>(Y980_RS00840)               | 36                                                              |
| Mycobacterium tuberculosis HKBS1<br>(NZ_CP002871.1)      | 24.77        | 2172407-2172457                  | 1      | alkane 1-monooxygenase<br>(HKBS1_RS10075)                            | 73                                                              |
|                                                          | 16.73        | 183231-183284                    | 1      | NAD(P) transhydrogenase subunit beta<br>(HKBS1_RS00840)              | 36                                                              |
| Mycobacterium tuberculosis K<br>(NZ_CP007803.1)          | 20.21        | 2159806-2159856                  | 1      | alkane 1-monooxygenase<br>(MTBK_RS09995)                             | 73                                                              |
|                                                          | 16.73        | 183165-183218                    | 1      | NAD(P) transhydrogenase subunit beta<br>(MTBK_RS00840)               | 36                                                              |
| Mycobacterium tuberculosis KZN                           | 24.77        | 2235812-2235762                  | -1     | monooxygenase (TBMG_RS10750)                                         | 73                                                              |

| Organism<br>(Genome ID)                                                     | Bit<br>score | ANTAR-target RNA<br>co-ordinates | Strand | Annotation of the gene linked to<br>ANTAR-target RNAs<br>(Locus Tag) | Distance (nt) of RNA<br>from gene linked to<br>ANTAR-target RNA |
|-----------------------------------------------------------------------------|--------------|----------------------------------|--------|----------------------------------------------------------------------|-----------------------------------------------------------------|
| 1435 (NC_012943.1)                                                          | 16.73        | 184908-184961                    | 1      | NAD(P) transhydrogenase subunit beta<br>(TBMG_RS00845)               | 36                                                              |
| Mycobacterium tuberculosis KZN<br>4207 (NC_016768.1)                        | 24.77        | 2232543-2232493                  | -1     | monooxygenase (TBSG_RS10740)                                         | 73                                                              |
|                                                                             | 16.73        | 184907-184960                    | 1      | NAD(P) transhydrogenase subunit beta<br>(TBSG_RS00845)               | 36                                                              |
| Mycobacterium tuberculosis KZN 605<br>(NC_018078.1)                         | 24.77        | 2235693-2235643                  | -1     | monooxygenase (TBXG_RS10755)                                         | 73                                                              |
|                                                                             | 16.73        | 184906-184959                    | 1      | NAD(P) transhydrogenase subunit beta<br>(TBXG_RS00845)               | 36                                                              |
| Mycobacterium tuberculosis str.<br>Beijing/NITR203 (NC_021054.1)            | 24.99        | 2187067-2187117                  | 1      | monooxygenase (J112_RS10210)                                         | 73                                                              |
|                                                                             | 16.73        | 184956-185009                    | 1      | NAD(P) transhydrogenase subunit beta<br>(J112_RS00850)               | 36                                                              |
| Mycobacterium tuberculosis str.<br>Erdman = ATCC 35801 DNA<br>(NC_020559.1) | 24.77        | 2178334-2178384                  | 1      | monooxygenase (ERDMAN_RS10140)                                       | 73                                                              |
|                                                                             | 16.73        | 184282-184335                    | 1      | NAD(P) transhydrogenase subunit beta<br>(ERDMAN_RS00840)             | 36                                                              |
| Mycobacterium tuberculosis str.<br>Haarlem (NC_022350.1)                    | 24.77        | 2186892-2186942                  | 1      | monooxygenase (TBHG_RS10090)                                         | 73                                                              |
|                                                                             | 16.73        | 185287-185340                    | 1      | NAD(P) transhydrogenase subunit beta<br>(TBHG_RS00840)               | 36                                                              |
| Mycobacterium tuberculosis str.<br>Kurono DNA (NZ_AP014573.1)               | 24.77        | 2192698-2192748                  | 1      | monooxygenase (KURONO_RS10185)                                       | 73                                                              |
|                                                                             | 16.73        | 186176-186229                    | 1      | NAD(P) transhydrogenase subunit beta<br>(KURONO_RS00850)             | 36                                                              |
| Mycobacterium tuberculosis strain<br>22103 (NZ_CP010339.1)                  | 24.77        | 2185332-2185382                  | 1      | monooxygenase (RN14_RS10075)                                         | 73                                                              |
|                                                                             | 16.73        | 185184-185237                    | 1      | NAD(P) transhydrogenase subunit beta<br>(RN14_RS00840)               | 36                                                              |
| Mycobacterium tuberculosis strain<br>22115 (NZ_CP010337.1)                  | 24.77        | 2190192-2190242                  | 1      | monooxygenase (RN12_RS10150)                                         | 73                                                              |
|                                                                             | 16.73        | 185165-185218                    | 1      | NAD(P) transhydrogenase subunit beta<br>(RN12_RS00835)               | 36                                                              |

| Organism<br>(Genome ID)                                          | Bit<br>score | ANTAR-target RNA<br>co-ordinates | Strand | Annotation of the gene linked to<br>ANTAR-target RNAs<br>(Locus Tag) | Distance (nt) of RNA<br>from gene linked to<br>ANTAR-target RNA |
|------------------------------------------------------------------|--------------|----------------------------------|--------|----------------------------------------------------------------------|-----------------------------------------------------------------|
| Mycobacterium tuberculosis strain<br>26105 (NZ_CP010340.1)       | 24.77        | 2199709-2199759                  | 1      | alkane 1-monooxygenase<br>(RN15_RS10215)                             | 73                                                              |
|                                                                  | 16.73        | 185418-185471                    | 1      | NAD(P) transhydrogenase subunit beta<br>(RN15_RS00835)               | 36                                                              |
| Mycobacterium tuberculosis strain<br>37004 (NZ_CP010338.1)       | 24.77        | 2182762-2182812                  | 1      | monooxygenase (RN13_RS10115)                                         | 73                                                              |
|                                                                  | 16.73        | 185172-185225                    | 1      | NAD(P) transhydrogenase subunit beta<br>(RN13_RS00835)               | 36                                                              |
| Mycobacterium tuberculosis strain<br>96075 (NZ_CP009426.1)       | 24.77        | 2167819-2167869                  | 1      | alkane 1-monooxygenase<br>(LJ70_RS10085)                             | 73                                                              |
|                                                                  | 16.73        | 182314-182367                    | 1      | NAD(P) transhydrogenase subunit beta<br>(LJ70_RS00840)               | 36                                                              |
| Mycobacterium tuberculosis strain<br>96121 (NZ_CP009427.1)       | 24.77        | 2195453-2195503                  | 1      | monooxygenase (HR37_RS10225)                                         | 73                                                              |
|                                                                  | 16.73        | 185032-185085                    | 1      | NAD(P) transhydrogenase subunit beta<br>(HR37_RS00845)               | 36                                                              |
| Mycobacterium tuberculosis strain<br>F28 (NZ_CP010330.1)         | 24.77        | 2194218-2194268                  | 1      | monooxygenase (RN05_RS10215)                                         | 73                                                              |
|                                                                  | 16.73        | 184967-185020                    | 1      | NAD(P) transhydrogenase subunit beta<br>(RN05_RS00835)               | 36                                                              |
| Mycobacterium tuberculosis strain<br>KIT87190 (NZ_CP007809.1)    | 24.77        | 2166335-2166385                  | 1      | alkane 1-monooxygenase<br>(ER17_RS10060)                             | 73                                                              |
|                                                                  | 16.73        | 182372-182425                    | 1      | NAD(P) transhydrogenase subunit beta<br>(ER17_RS00840)               | 36                                                              |
| Mycobacterium tuberculosis strain<br>SCAID 187.0 (NZ_CP012506.1) | 24.77        | 2160992-2161042                  | 1      | alkane 1-monooxygenase<br>(AFL40_RS10020)                            | 73                                                              |
|                                                                  | 16.73        | 181412-181465                    | 1      | NAD(P) transhydrogenase subunit beta<br>(AFL40_RS00825)              | 36                                                              |
| Mycobacterium tuberculosis strain<br>ZMC13-264 (NZ_CP009100.1)   | 24.77        | 2187257-2187307                  | 1      | alkane 1-monooxygenase<br>(IZ84_RS10135)                             | 73                                                              |



| Organism<br>(Genome ID)                                       | Bit<br>score | ANTAR-target RNA<br>co-ordinates | Strand | Annotation of the gene linked to<br>ANTAR-target RNAs<br>(Locus Tag) | Distance (nt) of RNA<br>from gene linked to<br>ANTAR-target RNA |
|---------------------------------------------------------------|--------------|----------------------------------|--------|----------------------------------------------------------------------|-----------------------------------------------------------------|
|                                                               | 16.73        | 185023-185076                    | 1      | NAD(P) transhydrogenase subunit beta<br>(IZ84_RS00845)               | 36                                                              |
| Mycobacterium tuberculosis strain<br>ZMC13-88 (NZ_CP009101.1) | 24.77        | 2187289-2187339                  | 1      | alkane 1-monooxygenase<br>(JE53_RS10145)                             | 73                                                              |
|                                                               | 16.73        | 184988-185041                    | 1      | NAD(P) transhydrogenase subunit beta<br>(JE53_RS00850)               | 36                                                              |
| Mycobacterium tuberculosis W-148<br>(NZ_CP012090.1)           | 24.77        | 1954309-1954359                  | 1      | alkane 1-monooxygenase<br>(TBPG_RS08905)                             | 73                                                              |
|                                                               | 16.73        | 183231-183284                    | 1      | NAD(P) transhydrogenase subunit beta<br>(TBPG_RS00835)               | 36                                                              |
| Mycobacterium vaccae 95051<br>(NZ_CP011491.1)                 | 26.53        | 5794907-5794851                  | -1     | esterase/ diacyl-glycerol transferase<br>(MYVA_RS27135)              | 58                                                              |
|                                                               | 16           | 3061381-3061433                  | 1      | acyl-CoA synthetase (MYVA_RS14355)                                   | 21                                                              |
|                                                               | 15.36        | 505581-505518                    | -1     | hypothetical protein (MYVA_RS02330)                                  | 7                                                               |
| Mycobacterium vanbaalenii PYR-1<br>(NC_008726.1)              | 30           | 6033960-6033904                  | -1     | esterase/ diacyl-glycerol transferase<br>(MVAN_RS28400)              | 61                                                              |
|                                                               | 17.47        | 3573570-3573511                  | -1     | 30S ribosomal protein S1<br>(MVAN_RS16845)                           | 91                                                              |
|                                                               | 17.16        | 380445-380510                    | 1      | putative GAF sensor protein<br>(MVAN_RS01770)                        | 22                                                              |
|                                                               | 15.13        | 2379314-2379255                  | -1     | aldehyde dehydrogenase<br>(MVAN_RS11160)                             | 40                                                              |
| Neomicrococcus aestuarii strain B18<br>(NZ_CP018135.1)        | 19.92        | 1224527-1224475                  | -1     | ABC transporter permease<br>(BHE16_RS05425)                          | 21                                                              |
|                                                               | 17.46        | 1469870-1469937                  | 1      | hypothetical protein (BHE16_RS06505)                                 | 70                                                              |
| Nocardia brasiliensis ATCC 700358<br>(NC_018681.1)            | 16.52        | 466485-466426                    | -1     | alpha/beta hydrolase (O3I_RS02080)                                   | 32                                                              |
|                                                               | 16.04        | 3190100-3190039                  | -1     | 5-aminolevulinate synthase                                           | 148                                                             |

| Organism<br>(Genome ID)                                                         | Bit<br>score | ANTAR-target RNA<br>co-ordinates | Strand | Annotation of the gene linked to<br>ANTAR-target RNAs<br>(Locus Tag)                                    | Distance (nt) of RNA<br>from gene linked to<br>ANTAR-target RNA |
|---------------------------------------------------------------------------------|--------------|----------------------------------|--------|---------------------------------------------------------------------------------------------------------|-----------------------------------------------------------------|
|                                                                                 |              |                                  |        | (O3I_RS14450)                                                                                           |                                                                 |
| Nocardia brasiliensis strain<br>FDAARGOS_352 (NZ_CP022088.1)                    | 16.52        | 6086749-6086808                  | 1      | alpha/beta hydrolase (CEQ30_RS27470)                                                                    | 32                                                              |
|                                                                                 | 15.19        | 3398943-3399004                  | 1      | 5-aminolevulinic synthase<br>(CEQ30_RS15060)                                                            | 148                                                             |
| Nocardia cyriacigeorgica GUH-2<br>complete genome (NC_016887.1)                 | 19.21        | 425232-425172                    | -1     | alpha/beta hydrolase (NOCYR_RS01960)                                                                    | 32                                                              |
|                                                                                 | 15.23        | 2129230-2129175                  | -1     | alpha/beta hydrolase (NOCYR_RS09530)                                                                    | 1                                                               |
| Nocardia farcinica genome assembly<br>NCTC11134, plasmid : 2<br>(NZ_LN868939.1) | 15.62        | 363725-363784                    | 1      | alpha/beta hydrolase (AMO33_RS18820)                                                                    | 0                                                               |
| Nocardia farcinica IFM 10152 DNA<br>(NC_006361.1)                               | 17.88        | 389632-389573                    | -1     | alpha/beta hydrolase (NFA_RS01905)                                                                      | 32                                                              |
|                                                                                 | 15.47        | 4424930-4424995                  | 1      | hypothetical protein (NFA_RS30625)                                                                      | 58                                                              |
| Nocardia nova SH22a<br>(NZ_CP006850.1)                                          | 20.73        | 7697964-7697910                  | -1     | alpha/beta hydrolase (NONO_RS34805)                                                                     | 26                                                              |
|                                                                                 | 15.5         | 7515908-7515859                  | -1     | hypothetical protein (NONO_RS39425)                                                                     | 33                                                              |
| Nocardia seriolae DNA, strain: UTF1<br>(NZ_AP017900.1)                          | 22.21        | 6584176-6584229                  | 1      | nitrate reductase molybdenum cofactor<br>assembly chaperone<br>(NSERUTF1_RS30720)                       | 62                                                              |
|                                                                                 | 19.19        | 552477-552424                    | -1     | acetoin dehydrogenase<br>dihydrolipoyllysine-residue<br>acetyltransferase subunit<br>(NSERUTF1_RS02545) | 26                                                              |
| Nocardia seriolae DNA, strain: UTF1<br>(NZ_AP017900.1)                          | 15.8         | 4227960-4227909                  | -1     | cytochrome P450 (NSERUTF1_RS19455)                                                                      | 34                                                              |
|                                                                                 | 15.75        | 5180104-5180039                  | -1     | KR domain-containing protein<br>(NSERUTF1_RS24110)                                                      | 79                                                              |
|                                                                                 | 15.72        | 957415-957359                    | -1     | IS4 family transposase<br>(NSERUTF1_RS04405)                                                            | 398                                                             |
| Nocardia seriolae strain EM150506<br>(NZ_CP017839.1)                            | 22.21        | 2300052-2299999                  | -1     | nitrate reductase molybdenum cofactor<br>assembly chaperone (NS506_RS10565)                             | 62                                                              |

| Organism<br>(Genome ID)                                      | Bit<br>score | ANTAR-target RNA<br>co-ordinates | Strand | Annotation of the gene linked to<br>ANTAR-target RNAs<br>(Locus Tag) | Distance (nt) of RNA<br>from gene linked to<br>ANTAR-target RNA |
|--------------------------------------------------------------|--------------|----------------------------------|--------|----------------------------------------------------------------------|-----------------------------------------------------------------|
|                                                              | 19.19        | 204678-204731                    | 1      | alpha/beta hydrolase (NS506_RS01055)                                 | 26                                                              |
|                                                              | 15.8         | 4746174-4746123                  | -1     | cytochrome P450 (NS506_RS21800)                                      | 34                                                              |
|                                                              | 15.75        | 6052574-6052509                  | -1     | KR domain-containing protein<br>(NS506_RS28010)                      | 79                                                              |
| Nocardia soli strain Y48<br>(NZ_CP018082.1)                  | 15.77        | 376014-376071                    | 1      | hypothetical protein (BOX37_RS01685)                                 | 42                                                              |
| Nocardia terpenica strain<br>NC_YFY_NT001 (NZ_CP023778.1)    | 17.03        | 7074978-7075034                  | 1      | xylose isomerase (CRH09_RS31310)                                     | 7                                                               |
|                                                              | 16.58        | 8308608-8308556                  | -1     | alpha/beta hydrolase (CRH09_RS37120)                                 | 26                                                              |
| Nonomuraea sp. ATCC 55076<br>(NZ_CP017717.1)                 | 20           | 9630594-9630535                  | -1     | DUF397 domain-containing protein<br>(BKM31_RS43705)                  | 1                                                               |
|                                                              | 16.45        | 5653656-5653608                  | -1     | sugar ABC transporter (BKM31_RS25565)                                | 30                                                              |
|                                                              | 16.07        | 4124855-4124911                  | 1      | CBS domain-containing protein<br>(BKM31_RS18760)                     | 79                                                              |
| Olsenella sp. oral taxon 807 strain<br>F0089 (NZ_CP012069.2) | 17.57        | 2778345-2778401                  | 1      | hypothetical protein (ADJ70_RS11980)                                 | 40                                                              |
| Olsenella uli DSM 7084<br>(NC_014363.1)                      | 16.27        | 208494-208553                    | 1      | LysR family transcriptional regulator<br>(OLSU_RS08990)              | 24                                                              |
|                                                              | 15.29        | 264364-264414                    | 1      | Fic family protein (OLSU_RS01165)                                    | 57                                                              |
| Paenarthrobacter aurescens TC1<br>(NC_008711.1)              | 17.57        | 678612-678551                    | -1     | MFS transporter (AAUR_RS03280)                                       | 83                                                              |
|                                                              | 17.13        | 2184804-2184862                  | 1      | sugar ABC transporter substrate-binding<br>protein (AAUR_RS09910)    | 88                                                              |
|                                                              | 15.44        | 4054153-4054097                  | -1     | LacI family transcriptional regulator<br>(AAUR_RS18450)              | 420                                                             |
|                                                              | 15.34        | 2273818-2273883                  | 1      | 30S ribosomal protein S1<br>(AAUR_RS10315)                           | 94                                                              |
|                                                              | 16.11        | 2729216-2729267                  | 1      | hypothetical protein (BAY61_RS12710)                                 | 36                                                              |

| Organism<br>(Genome ID)                                                                       | Bit<br>score | ANTAR-target RNA<br>co-ordinates | Strand | Annotation of the gene linked to<br>ANTAR-target RNAs<br>(Locus Tag) | Distance (nt) of RNA<br>from gene linked to<br>ANTAR-target RNA |
|-----------------------------------------------------------------------------------------------|--------------|----------------------------------|--------|----------------------------------------------------------------------|-----------------------------------------------------------------|
|                                                                                               | 15.6         | 5375237-5375179                  | -1     | TetR/AcrR family transcriptional regulator<br>(BAY61_RS24705)        | 17                                                              |
| Propionibacterium acnes ATCC 11828<br>(NC_017550.1)                                           | 19.1         | 1142938-1142874                  | -1     | hypothetical protein (TIIST44_RS05220)                               | 45                                                              |
| Propionibacterium acnes TypeIA2<br>P.acn17 (NC_016512.1)                                      | 19.1         | 146843-146779                    | -1     | hypothetical protein<br>(TIA2EST22_RS00625)                          | 45                                                              |
| Propionibacterium acnes TypeIA2<br>P.acn31 (NC_016511.1)                                      | 19.1         | 146852-146788                    | -1     | hypothetical protein<br>(TIA2EST36_RS00620)                          | 45                                                              |
| Propionibacterium acnes TypeIA2<br>P.acn33 (NC_016516.1)                                      | 19.1         | 146855-146791                    | -1     | hypothetical protein<br>(TIA2EST2_RS00620)                           | 45                                                              |
| Propionibacterium acnes TypeIA2<br>P.acn33 (NC_016516.1)                                      | 15.02        | 1290367-1290317                  | -1     | 2-deoxyribose-5-phosphate aldolase<br>(TIA2EST2_RS05990)             | 24                                                              |
| Propionibacterium freudenreichii<br>strain P.UF1 (NZ_CP018002.1)                              | 17.83        | 2035851-2035913                  | 1      | pyruvate oxidase (BMR99_RS09195)                                     | 44                                                              |
|                                                                                               | 16.05        | 722929-722867                    | -1     | methylmalonyl-CoA mutase small subunit<br>(BMR99_RS03065)            | 224                                                             |
|                                                                                               | 15.39        | 1543147-1543107                  | -1     | transcriptional regulator<br>(BMR99_RS06855)                         | 8                                                               |
|                                                                                               | 15.07        | 2595505-2595555                  | 1      | citrate synthase (BMR99_RS11540)                                     | 45                                                              |
| Propionibacterium freudenreichii<br>subsp. freudenreichii strain DSM<br>20271 (NZ_CP010341.1) | 17.83        | 510685-510623                    | -1     | pyruvate oxidase (RM25_RS02000)                                      | 44                                                              |
|                                                                                               | 16.05        | 852187-852125                    | -1     | methylmalonyl-CoA mutase small subunit<br>(RM25_RS03585)             | 224                                                             |
|                                                                                               | 15.39        | 1613530-1613478                  | -1     | transcriptional regulator (RM25_RS07000)                             | 20                                                              |
|                                                                                               | 15.07        | 2613515-2613565                  | 1      | citrate synthase (RM25_RS11475)                                      | 45                                                              |
| Propionibacterium freudenreichii<br>subsp. shermanii CIRM-BIA1<br>(NC_014215.1)               | 17.83        | 540373-540311                    | -1     | pyruvate oxidase (PFREUD_RS02185)                                    | 44                                                              |
|                                                                                               | 16.05        | 876756-876694                    | -1     | methylmalonyl-CoA mutase small subunit<br>(PFREUD_RS03765)           | 224                                                             |
|                                                                                               | 15.39        | 1644669-1644617                  | -1     | transcriptional regulator                                            | 20                                                              |

| Organism<br>(Genome ID)                                                                          | Bit<br>score | ANTAR-target RNA<br>co-ordinates | Strand | Annotation of the gene linked to<br>ANTAR-target RNAs<br>(Locus Tag)           | Distance (nt) of RNA<br>from gene linked to<br>ANTAR-target RNA |
|--------------------------------------------------------------------------------------------------|--------------|----------------------------------|--------|--------------------------------------------------------------------------------|-----------------------------------------------------------------|
|                                                                                                  |              |                                  |        | (PFREUD_RS07175)                                                               |                                                                 |
|                                                                                                  | 15.07        | 2579483-2579533                  | 1      | citrate synthase (PFREUD_RS11405)                                              | 5                                                               |
| Propionibacterium freudenreichii<br>subsp. shermanii isolate PFREUDJS1<br>(NZ_LN997841.1)        | 17.83        | 2329779-2329841                  | 1      | pyruvate oxidase<br>(PFREUDJS001_RS10290)                                      | 44                                                              |
|                                                                                                  | 16.05        | 755246-755184                    | -1     | methylmalonyl-CoA mutase small subunit<br>(PFREUDJS001_RS03180)                | 224                                                             |
|                                                                                                  | 15.07        | 2620242-2620292                  | 1      | citrate synthase<br>(PFREUDJS001_RS11525)                                      | 45                                                              |
| Propionibacterium sp. oral taxon 193<br>strain F0672 (NZ_CP017040.1)                             | 15           | 580710-580763                    | 1      | homoserine O-acetyltransferase<br>(BCB70_RS02700)                              | 477                                                             |
| Propionimicrobium sp. Marseille-<br>P3275 strain Marseille-P3275T<br>contig00001 (NZ_LT706985.1) | 23.61        | 1778691-1778741                  | 1      | LacI family transcriptional regulator<br>(CZ356_RS08345)                       | 23                                                              |
|                                                                                                  | 19.78        | 764873-764823                    | -1     | glycosyltransferase family 2 protein<br>(CZ356_RS03665)                        | 76                                                              |
|                                                                                                  | 18.17        | 581857-581803                    | -1     | DNA polymerase III subunit epsilon<br>(CZ356_RS02670)                          | 255                                                             |
|                                                                                                  | 16.68        | 1275582-1275638                  | 1      | MFS transporter (CZ356_RS06130)                                                | 4                                                               |
| Pseudarthrobacter chlorophenolicus<br>A6 plasmid pACHL01 (NC_011879.1)                           | 17.72        | 279963-279898                    | -1     | hypothetical protein (ACHL_RS21730)                                            | 16                                                              |
| Pseudarthrobacter chlorophenolicus<br>A6 (NC_011886.1)                                           | 25           | 676358-676423                    | 1      | methylmalonate-semialdehyde<br>dehydrogenase (CoA acylating)<br>(ACHL_RS03150) | 2                                                               |
|                                                                                                  | 21.97        | 95577-95640                      | 1      | tripartite tricarboxylate transporter TctB<br>family protein (ACHL_RS00470)    | 23                                                              |
|                                                                                                  | 17.17        | 404622-404675                    | 1      | alpha-N-arabinofuranosidase<br>(ACHL_RS01895)                                  | 14                                                              |
|                                                                                                  | 15.61        | 357905-357964                    | 1      | dihydroxyacetone kinase subunit Dhak<br>(ACHL_RS01655)                         | 73                                                              |

| Organism<br>(Genome ID)                                                          | Bit<br>score | ANTAR-target RNA<br>co-ordinates | Strand | Annotation of the gene linked to<br>ANTAR-target RNAs<br>(Locus Tag)  | Distance (nt) of RNA<br>from gene linked to<br>ANTAR-target RNA |
|----------------------------------------------------------------------------------|--------------|----------------------------------|--------|-----------------------------------------------------------------------|-----------------------------------------------------------------|
|                                                                                  | 15.34        | 2039538-2039603                  | 1      | 30S ribosomal protein S1<br>(ACHL_RS09090)                            | 94                                                              |
| Pseudarthrobacter<br>phenanthrenivorans Sphe3 plasmid<br>pASPHE302 (NC_015147.1) | 18.43        | 75616-75561                      | -1     | ferredoxin--NAD(+) reductase<br>(ASPHE3_RS21045)                      | 183                                                             |
| Pseudarthrobacter<br>phenanthrenivorans Sphe3<br>(NC_015145.1)                   | 18.35        | 3706123-3706068                  | -1     | sugar ABC transporter substrate-binding<br>protein (ASPHE3_RS17190)   | 3                                                               |
|                                                                                  | 17.88        | 2273699-2273754                  | 1      | LacI family DNA-binding transcriptional<br>regulator (ASPHE3_RS10460) | 17                                                              |
|                                                                                  | 17.13        | 618889-618838                    | -1     | 2-hydroxyacid dehydrogenase<br>(ASPHE3_RS03000)                       | 485                                                             |
|                                                                                  | 17.04        | 3203787-3203847                  | 1      | two-component sensor histidine kinase<br>(ASPHE3_RS21255)             | 17                                                              |
|                                                                                  | 15.27        | 1917982-1918047                  | 1      | 30S ribosomal protein S1<br>(ASPHE3_RS08800)                          | 94                                                              |
| Pseudarthrobacter sulfonivorans<br>strain Ar51 (NZ_CP013747.1)                   | 24.63        | 2250041-2249980                  | -1     | sugar ABC transporter ATP-binding<br>protein (AU252_RS10090)          | 5                                                               |
|                                                                                  | 18.68        | 1830214-1830155                  | -1     | hypothetical protein (AU252_RS08050)                                  | 0                                                               |
|                                                                                  | 16.76        | 4278609-4278677                  | 1      | ribonuclease HII (AU252_RS19425)                                      | 74                                                              |
|                                                                                  | 16.6         | 3355696-3355746                  | 1      | ABC transporter substrate-binding protein<br>(AU252_RS15200)          | 35                                                              |
|                                                                                  | 16.06        | 2996339-2996282                  | -1     | copper oxidase (AU252_RS13495)                                        | 45                                                              |
|                                                                                  | 15.65        | 267906-267857                    | -1     | aldehyde dehydrogenase<br>(AU252_RS01160)                             | 7                                                               |
|                                                                                  | 15.65        | 262426-262377                    | -1     | aldehyde dehydrogenase<br>(AU252_RS01140)                             | 7                                                               |
|                                                                                  | 15.62        | 3777164-3777116                  | -1     | type I pantothenate kinase<br>(AU252_RS17175)                         | 33                                                              |

| Organism<br>(Genome ID)                                           | Bit<br>score | ANTAR-target RNA<br>co-ordinates | Strand | Annotation of the gene linked to<br>ANTAR-target RNAs<br>(Locus Tag)                | Distance (nt) of RNA<br>from gene linked to<br>ANTAR-target RNA |
|-------------------------------------------------------------------|--------------|----------------------------------|--------|-------------------------------------------------------------------------------------|-----------------------------------------------------------------|
|                                                                   | 15.27        | 4860429-4860364                  | -1     | 30S ribosomal protein S1<br>(AU252_RS22125)                                         | 94                                                              |
| Pseudonocardia sp. EC080610-09<br>plasmid pBCI2-1 (NZ_CP012182.1) | 19.87        | 279077-279030                    | -1     | VOC family protein (AD006_RS29515)                                                  | 68                                                              |
| Pseudonocardia sp. EC080619-01<br>plasmid pBCI1-2 (NZ_CP012185.1) | 19.87        | 769514-769561                    | 1      | VOC family protein (AD017_RS31735)                                                  | 68                                                              |
| Pseudopropionibacterium<br>propionicum F0230a (NC_018142.1)       | 16.43        | 301894-301959                    | 1      | hypothetical protein<br>(HMPREF9154_RS01395)                                        | 12                                                              |
| Renibacterium salmoninarum ATCC<br>33209 (NC_010168.1)            | 18.03        | 1074795-1074848                  | 1      | hypothetical protein<br>(RSAL33209_RS05485)                                         | 10                                                              |
|                                                                   | 16.29        | 1070998-1070939                  | -1     | hypothetical protein<br>(RSAL33209_RS05450)                                         | 64                                                              |
|                                                                   | 16.23        | 1005759-1005815                  | 1      | membrane protein<br>(RSAL33209_RS05135)                                             | 92                                                              |
|                                                                   | 15.18        | 1611245-1611182                  | -1     | methylmalonate-semialdehyde<br>dehydrogenase (CoA acylating)<br>(RSAL33209_RS08115) | 17                                                              |
|                                                                   | 15.14        | 2957917-2957855                  | -1     | Nif3-like dinuclear metal center hexameric<br>protein (RSAL33209_RS14620)           | 231                                                             |
| Rhodococcus aetherivorans strain<br>lcdP1 (NZ_CP011341.1)         | 16.81        | 2510931-2510983                  | 1      | malate:quinone oxidoreductase<br>(AAT18_RS11550)                                    | 36                                                              |
| Rhodococcus erythropolis CCM2595<br>(NC_022115.1)                 | 18.48        | 137578-137631                    | 1      | TetR family transcriptional regulator<br>(O5Y_RS00625)                              | 7                                                               |
|                                                                   | 16.01        | 3652209-3652256                  | 1      | cytosol aminopeptidase (O5Y_RS16480)                                                | 255                                                             |
| Rhodococcus erythropolis PR4 DNA<br>(NC_012490.1)                 | 16.01        | 3959281-3959328                  | 1      | cytosol aminopeptidase (RER_RS20095)                                                | 255                                                             |
|                                                                   | 15.3         | 2862098-2862037                  | -1     | D-Ala-D-Ala carboxypeptidase<br>(RER_RS15290)                                       | 34                                                              |
| Rhodococcus erythropolis R138                                     | 16.01        | 3214398-3214351                  | -1     | cytosol aminopeptidase (H351_RS15050)                                               | 255                                                             |

| Organism<br>(Genome ID)                                        | Bit<br>score | ANTAR-target RNA<br>co-ordinates | Strand | Annotation of the gene linked to<br>ANTAR-target RNAs<br>(Locus Tag)                                                    | Distance (nt) of RNA<br>from gene linked to<br>ANTAR-target RNA |
|----------------------------------------------------------------|--------------|----------------------------------|--------|-------------------------------------------------------------------------------------------------------------------------|-----------------------------------------------------------------|
| (NZ_CP007255.1)                                                |              |                                  |        |                                                                                                                         |                                                                 |
| Rhodococcus erythropolis strain<br>BG43 (NZ_CP011295.1)        | 18.48        | 137863-137916                    | 1      | TetR family transcriptional regulator<br>(XU06_RS00630)                                                                 | 7                                                               |
|                                                                | 16.01        | 3690230-3690277                  | 1      | cytosol aminopeptidase (XU06_RS16800)                                                                                   | 255                                                             |
| Rhodococcus fascians D188<br>(NZ_CP015235.1)                   | 16.47        | 133189-133127                    | -1     | gamma-aminobutyraldehyde<br>dehydrogenase (A3L23_RS00625)                                                               | 418                                                             |
| Rhodococcus jostii RHA1<br>(NC_008268.1)                       | 16.62        | 7784307-7784251                  | -1     | NADH dehydrogenase (RHA1_RS35505)                                                                                       | 363                                                             |
|                                                                | 16.19        | 2609128-2609176                  | 1      | alanine racemase (RHA1_RS12030)                                                                                         | 50                                                              |
| Rhodococcus opacus B4 DNA<br>(NC_012522.1)                     | 15.99        | 4334716-4334769                  | 1      | hypothetical protein (ROP_RS19920)                                                                                      | 49                                                              |
|                                                                | 15.69        | 7609996-7610064                  | 1      | hypothetical protein (ROP_RS40775)                                                                                      | 144                                                             |
| Rhodococcus sp. B7740<br>(NZ_CP010797.1)                       | 18.19        | 4970838-4970892                  | 1      | MFS transporter (NY08_RS23335)                                                                                          | 23                                                              |
|                                                                | 16.04        | 3887305-3887364                  | 1      | DNA-binding protein (NY08_RS18010)                                                                                      | 96                                                              |
| Rhodococcus sp. PBTS2<br>(NZ_CP015220.1)                       | 16.47        | 3411253-3411315                  | 1      | gamma-aminobutyraldehyde<br>dehydrogenase (A3Q41_RS16235)                                                               | 418                                                             |
| Rhodoluna ladicola strain MWH-Ta8<br>(NZ_CP007490.1)           | 15.68        | 1202741-1202801                  | 1      | branched-chain amino acid ABC<br>transporter permease (RHOLA_RS05925)                                                   | 17                                                              |
|                                                                | 15.24        | 330217-330150                    | -1     | acetate--CoA ligase (RHOLA_RS01590)                                                                                     | 14                                                              |
| Rothia dentocariosa ATCC 17931<br>(NC_014643.1)                | 17.47        | 1473946-1474000                  | 1      | bifunctional methylenetetrahydrofolate<br>dehydrogenase/methenyltetrahydrofolate<br>cyclohydrolase (HMPREF0733_RS06405) | 39                                                              |
| Rothia mucilaginosa DNA, strain:<br>NUM-Rm6536 (NZ_AP014938.1) | 15.97        | 437430-437480                    | 1      | RNA-binding S4 domain-containing<br>protein (RM6536_RS01640)                                                            | 88                                                              |
| Rothia mucilaginosa DY-18 DNA<br>(NC_013715.1)                 | 18.33        | 83293-83238                      | -1     | ornithine cyclodeaminase<br>(RMDY18_RS00360)                                                                            | 5                                                               |
|                                                                | 15.45        | 1021609-1021661                  | 1      | hypothetical protein (RMDY18_RS04100)                                                                                   | 42                                                              |
| Rothia mucilaginosa strain                                     | 15.97        | 761512-761562                    | 1      | RNA-binding S4 domain-containing                                                                                        | 88                                                              |



| Organism<br>(Genome ID)                                                 | Bit<br>score | ANTAR-target RNA<br>co-ordinates | Strand | Annotation of the gene linked to<br>ANTAR-target RNAs<br>(Locus Tag)     | Distance (nt) of RNA<br>from gene linked to<br>ANTAR-target RNA |
|-------------------------------------------------------------------------|--------------|----------------------------------|--------|--------------------------------------------------------------------------|-----------------------------------------------------------------|
| FDAARGOS_369 (NZ_CP023510.1)                                            |              |                                  |        | protein (CO690_RS03200)                                                  |                                                                 |
| Saccharomonospora viridis DSM<br>43017 (NC_013159.1)                    | 17.42        | 3078960-3079028                  | 1      | XRE family transcriptional regulator<br>(SVIR_RS13855)                   | 12                                                              |
| Saccharothrix espanaensis DSM<br>44229 complete genome<br>(NC_019673.1) | 19.42        | 5436887-5436821                  | -1     | hypothetical protein (BN6_RS23530)                                       | 2                                                               |
|                                                                         | 16.17        | 3146208-3146270                  | 1      | hypothetical protein (BN6_RS42935)                                       | 21                                                              |
| Sanguibacter keddieii DSM 10542<br>(NC_013521.1)                        | 19.26        | 337201-337151                    | -1     | ABC transporter substrate-binding protein<br>(SKED_RS01520)              | 10                                                              |
| Scardovia inopinata JCM 12537 DNA<br>(NZ_AP012334.1)                    | 18.1         | 1529587-1529653                  | 1      | putative holin-like toxin (SCIP_RS07835)                                 | 20                                                              |
|                                                                         | 15.07        | 1500669-1500618                  | -1     | hypothetical protein (SCIP_RS06140)                                      | 36                                                              |
| Sinomonas atrocyanea strain KCTC<br>3377 (NZ_CP014518.1)                | 16.5         | 1024306-1024253                  | -1     | hypothetical protein (SA2016_RS04845)                                    | 33                                                              |
|                                                                         | 15.66        | 1617992-1617930                  | -1     | nitrite reductase (SA2016_RS07460)                                       | 68                                                              |
| Slackia heliotrinireducens DSM 20476<br>(NC_013165.1)                   | 23.09        | 1700501-1700444                  | -1     | 3'-phosphoadenosine 5'-phosphosulfate<br>sulfotransferase (SHEL_RS07250) | 413                                                             |
|                                                                         | 21.59        | 1987700-1987750                  | 1      | 3-methyl-2-oxobutanoate dehydrogenase<br>subunit VorB (SHEL_RS08610)     | 5                                                               |
|                                                                         | 20.42        | 1226733-1226789                  | 1      | recombinase RecA (SHEL_RS05250)                                          | 82                                                              |
| Stackebrandtia nassauensis DSM<br>44728 (NC_013947.1)                   | 20.8         | 4871519-4871574                  | 1      | NAD-dependent malic enzyme<br>(SNAS_RS22550)                             | 29                                                              |
|                                                                         | 18.92        | 1917023-1917082                  | 1      | hypothetical protein (SNAS_RS09010)                                      | 30                                                              |
| Streptomyces albus J1074<br>(NC_020990.1)                               | 15.09        | 2012095-2012045                  | -1     | ABC transporter permease<br>(XNR_RS08435)                                | 171                                                             |
| Streptomyces albus strain SM254<br>(NZ_CP014485.1)                      | 15.09        | 2289125-2289075                  | -1     | ABC transporter permease<br>(Salbus254_RS09635)                          | 171                                                             |
| Streptomyces avermitilis MA-4680 =<br>NBRC 14893 DNA (NC_003155.5)      | 15.7         | 2358373-2358320                  | -1     | membrane protein (SAVERM_RS10160)                                        | 398                                                             |
|                                                                         | 15.36        | 2967279-2967226                  | -1     | mannosyltransferase<br>(SAVERM_RS12700)                                  | 159                                                             |

| Organism<br>(Genome ID)                                                       | Bit<br>score | ANTAR-target RNA<br>co-ordinates | Strand | Annotation of the gene linked to<br>ANTAR-target RNAs<br>(Locus Tag) | Distance (nt) of RNA<br>from gene linked to<br>ANTAR-target RNA |
|-------------------------------------------------------------------------------|--------------|----------------------------------|--------|----------------------------------------------------------------------|-----------------------------------------------------------------|
| Streptomyces bingchenggensis BCW-1 (NC_016582.1)                              | 22.79        | 1325634-1325572                  | -1     | molecular chaperone DnaK (SBI_RS04410)                               | 32                                                              |
| Streptomyces cyaneogriseus subsp. noncyanogenus strain NMWT 1 (NZ_CP010849.1) | 16.78        | 2043973-2043899                  | -1     | transcriptional regulator (TU94_RS08155)                             | 51                                                              |
| Streptomyces fulvissimus DSM 40593 (NC_021177.1)                              | 15.64        | 2195512-2195450                  | -1     | hypothetical protein (SFUL_RS09650)                                  | 82                                                              |
| Streptomyces glaucescens strain GLA.O (NZ_CP009438.1)                         | 15.45        | 2684874-2684812                  | -1     | hypothetical protein (SGLAU_RS11560)                                 | 55                                                              |
| Streptomyces globisporus C-1027 (NZ_CP013738.1)                               | 15.24        | 2202150-2202088                  | -1     | hypothetical protein (WQO_RS09685)                                   | 82                                                              |
| Streptomyces griseus subsp. griseus NBRC 13350 DNA (NC_010572.1)              | 15.24        | 6048357-6048419                  | 1      | hypothetical protein (SGR_RS25590)                                   | 82                                                              |
| Streptomyces lividans TK24 (NZ_CP009124.1)                                    | 15.45        | 7213814-7213751                  | -1     | LacI family transcriptional regulator (SLIV_RS32445)                 | 91                                                              |
| Streptomyces lydicus A02 (NZ_CP007699.1)                                      | 21.31        | 6061131-6061192                  | 1      | LacI family transcriptional regulator (T261_RS27005)                 | 9                                                               |
|                                                                               | 18.01        | 2624882-2624829                  | -1     | hypothetical protein (T261_RS11520)                                  | 302                                                             |
|                                                                               | 15.49        | 9065496-9065546                  | 1      | type III effector protein (T261_RS39710)                             | 274                                                             |
| Streptomyces parvulus strain 2297 (NZ_CP015866.1)                             | 16.28        | 4484722-4484667                  | -1     | decaprenylphosphoryl-beta-D-ribose oxidase (Spa2297_RS20440)         | 18                                                              |
| Streptomyces pratensis ATCC 33331 (NC_016114.1)                               | 17.7         | 4725819-4725761                  | -1     | hypothetical protein (SFLA_RS20365)                                  | 27                                                              |
| Streptomyces pristinaespiralis strain HCCB 10218 (NZ_CP011340.1)              | 18.83        | 8476818-8476874                  | 1      | exonuclease SbcC (SPRI_RS36235)                                      | 97                                                              |
|                                                                               | 18.83        | 55775-55719                      | -1     | exonuclease sbcCD subunit D (SPRI_RS00190)                           | 97                                                              |
|                                                                               | 17.8         | 7513420-7513468                  | 1      | sugar ABC transporter (SPRI_RS32325)                                 | 72                                                              |

| Organism<br>(Genome ID)                                       | Bit<br>score | ANTAR-target RNA<br>co-ordinates | Strand | Annotation of the gene linked to<br>ANTAR-target RNAs<br>(Locus Tag) | Distance (nt) of RNA<br>from gene linked to<br>ANTAR-target RNA |
|---------------------------------------------------------------|--------------|----------------------------------|--------|----------------------------------------------------------------------|-----------------------------------------------------------------|
|                                                               | 15.35        | 5557595-5557641                  | 1      | agmatinase (SPRI_RS23705)                                            | 11                                                              |
| Streptomyces scabiei 87.22 complete<br>genome (NC_013929.1)   | 16.26        | 9274780-9274829                  | 1      | L-asparagine permease<br>(SCAB_RS39965)                              | 7                                                               |
| Streptomyces sp. 4F<br>(NZ_CP013142.1)                        | 17.52        | 3516700-3516640                  | -1     | class II fructose-bisphosphate aldolase<br>(ASR50_RS15530)           | 32                                                              |
| Streptomyces sp. CFMR 7 strain<br>CFMR-7 (NZ_CP011522.1)      | 15.24        | 6226773-6226835                  | 1      | hypothetical protein (ABE83_RS26035)                                 | 82                                                              |
| Streptomyces sp. CNQ-509<br>(NZ_CP011492.1)                   | 18.89        | 3795481-3795431                  | -1     | 50S ribosomal protein L9<br>(AA958_RS16065)                          | 1                                                               |
| Streptomyces sp. PAMC26508<br>(NC_021055.1)                   | 19.99        | 2739778-2739819                  | 1      | hypothetical protein (F750_RS12050)                                  | 35                                                              |
| Streptomyces sp. S10(2016)<br>(NZ_CP015098.1)                 | 16.09        | 5995834-5995780                  | -1     | MarR family transcriptional regulator<br>(A4E84_RS26725)             | 155                                                             |
| Streptomyces sp. SAT1<br>(NZ_CP015849.1)                      | 15.79        | 5047550-5047500                  | -1     | hypothetical protein (A8713_RS21920)                                 | 38                                                              |
| Streptomyces sp. SirexAA-E<br>(NC_015953.1)                   | 16.1         | 1565172-1565240                  | 1      | TetR family transcriptional regulator<br>(SACTE_RS06915)             | 25                                                              |
|                                                               | 15.43        | 1508400-1508345                  | -1     | transcriptional regulator<br>(SACTE_RS06635)                         | 32                                                              |
| Streptomyces venezuelae strain<br>ATCC 15439 (NZ_CP013129.1)  | 18.23        | 6497952-6497896                  | -1     | hypothetical protein (AQF52_RS29165)                                 | 30                                                              |
|                                                               | 16.07        | 3448862-3448808                  | -1     | hypothetical protein (AQF52_RS15265)                                 | 24                                                              |
| Streptomyces vietnamensis strain<br>GIM4.0001 (NZ_CP010407.1) | 18.68        | 142442-142501                    | 1      | hypothetical protein (SVTN_RS00745)                                  | 49                                                              |
|                                                               | 16.41        | 2463738-2463683                  | -1     | pullulanase-type alpha-1,6-glucosidase<br>(SVTN_RS10835)             | 143                                                             |
|                                                               | 15.51        | 7881746-7881797                  | 1      | succinyl-CoA--3-ketoacid-CoA transferase<br>(SVTN_RS35175)           | 24                                                              |
|                                                               | 15.38        | 3227892-3227837                  | -1     | hypothetical protein (SVTN_RS14300)                                  | 24                                                              |

| Organism<br>(Genome ID)                                    | Bit<br>score | ANTAR-target RNA<br>co-ordinates | Strand | Annotation of the gene linked to<br>ANTAR-target RNAs<br>(Locus Tag)     | Distance (nt) of RNA<br>from gene linked to<br>ANTAR-target RNA |
|------------------------------------------------------------|--------------|----------------------------------|--------|--------------------------------------------------------------------------|-----------------------------------------------------------------|
| Tessaracoccus sp. NSG39<br>(NZ_CP019606.1)                 | 17.06        | 2506818-2506764                  | -1     | DUF3263 domain-containing protein<br>(BW730_RS11675)                     | 9                                                               |
|                                                            | 15.8         | 3143239-3143292                  | 1      | MgtC/SapB family protein<br>(BW730_RS14350)                              | 14                                                              |
| Tessaracoccus sp. T2.5-30<br>(NZ_CP019229.1)               | 16.52        | 146536-146474                    | -1     | CsbD family protein (BKM78_RS00755)                                      | 10                                                              |
|                                                            | 16           | 1577319-1577267                  | -1     | aquaporin family protein<br>(BKM78_RS07235)                              | 7                                                               |
| Trueperella pyogenes strain 2012CQ-<br>ZSH (NZ_CP012649.1) | 22.62        | 324777-324715                    | -1     | dihydroxyacetone kinase<br>(AN946_RS01315)                               | 17                                                              |
|                                                            | 21.51        | 1421966-1422025                  | 1      | BMP family ABC transporter substrate-<br>binding protein (AN946_RS06170) | 5                                                               |
|                                                            | 19.79        | 305936-305991                    | 1      | GntP family permease (AN946_RS01245)                                     | 16                                                              |
|                                                            | 19.48        | 1400555-1400498                  | -1     | hypothetical protein (AN946_RS06105)                                     | 29                                                              |
|                                                            | 17.11        | 1076589-1076642                  | 1      | ABC transporter ATP-binding protein<br>(AN946_RS04625)                   | 46                                                              |
|                                                            | 16.74        | 1566665-1566719                  | 1      | L-fucose isomerase (AN946_RS06865)                                       | 6                                                               |
|                                                            | 16.33        | 2151628-2151567                  | -1     | sugar (glycoside-pentoside-Hexuronide)<br>transporter (AN946_RS09515)    | 5                                                               |
|                                                            | 16.18        | 883231-883287                    | 1      | FMN-binding negative transcriptional<br>regulator (AN946_RS03735)        | 217                                                             |
|                                                            | 15.69        | 1750466-1750525                  | 1      | 30S ribosomal protein S1<br>(AN946_RS07755)                              | 91                                                              |
|                                                            | 15.68        | 277245-277195                    | -1     | hypothetical protein (AN946_RS01135)                                     | 326                                                             |
| Trueperella pyogenes strain TP6375<br>(NZ_CP007519.1)      | 21.51        | 848407-848348                    | -1     | ABC transporter ATP-binding protein<br>(CQ11_RS04015)                    | 5                                                               |
|                                                            | 19.79        | 1995302-1995247                  | -1     | GntP family permease (CQ11_RS09140)                                      | 16                                                              |
|                                                            | 19.48        | 869818-869875                    | 1      | hypothetical protein (CQ11_RS10670)                                      | 29                                                              |

| Organism<br>(Genome ID)                     | Bit<br>score | ANTAR-target RNA<br>co-ordinates | Strand | Annotation of the gene linked to<br>ANTAR-target RNAs<br>(Locus Tag) | Distance (nt) of RNA<br>from gene linked to<br>ANTAR-target RNA |
|---------------------------------------------|--------------|----------------------------------|--------|----------------------------------------------------------------------|-----------------------------------------------------------------|
|                                             | 17.78        | 1401608-1401552                  | -1     | FMN-binding negative transcriptional regulator (CQ11_RS06540)        | 218                                                             |
|                                             | 17.75        | 1203837-1203784                  | -1     | ABC transporter ATP-binding protein (CQ11_RS05610)                   | 46                                                              |
|                                             | 16.92        | 1802328-1802264                  | -1     | hypothetical protein (CQ11_RS08330)                                  | 83                                                              |
|                                             | 16.74        | 659505-659451                    | -1     | L-fucose isomerase (CQ11_RS03075)                                    | 6                                                               |
|                                             | 16.33        | 469089-469028                    | -1     | hypothetical protein (CQ11_RS02190)                                  | 5                                                               |
|                                             | 15.69        | 65751-65810                      | 1      | 30S ribosomal protein S1 (CQ11_RS00345)                              | 91                                                              |
|                                             | 15.68        | 2022040-2022090                  | 1      | MgtC/SapB family protein (CQ11_RS09240)                              | 325                                                             |
| Trueperella pyogenes TP8<br>(NZ_CP007003.1) | 21.51        | 794541-794600                    | 1      | BMP family ABC transporter substrate-binding protein (X956_RS03620)  | 5                                                               |
|                                             | 20.13        | 1952893-1952949                  | 1      | sugar ABC transporter substrate-binding protein (X956_RS08895)       | 29                                                              |
|                                             | 19.79        | 1911013-1911068                  | 1      | GntP family permease (X956_RS08740)                                  | 16                                                              |
|                                             | 19.48        | 773131-773074                    | -1     | TetR/AcrR family transcriptional regulator (X956_RS10475)            | 29                                                              |
|                                             | 17.11        | 426192-426245                    | 1      | ABC transporter ATP-binding protein (X956_RS01940)                   | 46                                                              |
|                                             | 16.74        | 956842-956896                    | 1      | L-fucose isomerase (X956_RS04470)                                    | 6                                                               |
|                                             | 16.33        | 1534199-1534138                  | -1     | sugar (glycoside-pentoside-Hexuronide) transporter (X956_RS07145)    | 5                                                               |
|                                             | 16.18        | 232466-232522                    | 1      | FMN-binding negative transcriptional regulator (X956_RS01025)        | 217                                                             |
|                                             | 15.69        | 1174479-1174420                  | -1     | 30S ribosomal protein S1 (X956_RS05495)                              | 91                                                              |

| <b>Organism<br/>(Genome ID)</b>                        | <b>Bit<br/>score</b> | <b>ANTAR-target RNA<br/>co-ordinates</b> | <b>Strand</b> | <b>Annotation of the gene linked to<br/>ANTAR-target RNAs<br/>(Locus Tag)</b> | <b>Distance (nt) of RNA<br/>from gene linked to<br/>ANTAR-target RNA</b> |
|--------------------------------------------------------|----------------------|------------------------------------------|---------------|-------------------------------------------------------------------------------|--------------------------------------------------------------------------|
|                                                        | 15.68                | 82570-82620                              | 1             | hypothetical protein (X956_RS00375)                                           | 325                                                                      |
|                                                        | 15.68                | 1882450-1882400                          | -1            | hypothetical protein (X956_RS08635)                                           | 325                                                                      |
| Verrucosipora maris AB-18-032<br>(NC_015434.1)         | 15.07                | 4457207-4457151                          | -1            | hypothetical protein<br>(VAB18032_RS19750)                                    | 14                                                                       |
| Xylanimonas cellulositytica DSM<br>15894 (NC_013530.1) | 19.67                | 474824-474871                            | 1             | sugar ABC transporter substrate-binding<br>protein (XCEL_RS02040)             | 17                                                                       |

Table S3: Alignment of actinobacterial ANTAR-target RNAs predicted using Infernal.

Structure based alignment of ANTAR-target RNAs obtained using Infernal are shown sorted according to the bit scores. Alignment is edited using RALEE v0.8 (PMID: 15377506). The stems are shaded in pink and blue. Secondary structure of RNAs is represented by WUSS notation.

| Accession/Start-End                         | Sequence                                                                        |
|---------------------------------------------|---------------------------------------------------------------------------------|
| <a href="#">NC_022567/1325289-1325349</a>   | AAAAAUCUCUUGCAAUGAU. GCAA CGGuc.....ggGUUAUCAUGCA. .AAGCU GCUUGAGCGGAAG         |
| <a href="#">NC_015564/4535773-4535832</a>   | AAUGAACUAUCUACACGUAU. GUAGAAUu.....ggUGAACUCAUGCA. .AAGGAGCAUGCGAUGCCA          |
| <a href="#">NZ_CP014761/2225592-2225649</a> | AUCAUGGUCUCUACACGUAU. GUAGUAC.....aACGUUGUAGACA. .AGGGU GUCACACACCGCG           |
| <a href="#">NC_008726/6033904-6033960</a>   | AGAGAGAUCAACACAAAGGU. GUGGUUG.....ACUACACGGCA. .AAGUGGCCGGUUUUCGGG              |
| <a href="#">NZ_CP007443/1784660-1784721</a> | AAAACGGCGACCGCAAAGCU. GCGGUUGcc.....guaACAGAUACGGCA. .AUGGGGCCGGAAAACAG         |
| <a href="#">NC_014218/792299-792362</a>     | UGCGUGUAUUGCAGUGAUG. GUGCUUUuau.....acgcAUCACUAUGUCA. .AUGGAGACACUAGAAAAG       |
| <a href="#">NZ_CP011491/5794851-5794907</a> | AAAGAGAUCGCGACAAAGGU. GUGGUUG.....ACUACACGGCA. .CAGUGGCCGUUCGUGGGA              |
| <a href="#">NZ_CP016773/11044-11115</a>     | AACAAAUUCUUAACAAAGGU. GUUGUC Caccgcaa... agucaucuUGUUCAGGCA. .AGGAAGCCGAUUUACAG |
| <a href="#">NZ_CP012390/604046-604102</a>   | AGGUUCUCGACCGCAUUGGU. GUGAUGC.....UUUGACAGGGCA. .ACGAUGCCGAUAAACGACA            |
| <a href="#">NZ_CP010437/2041213-2041274</a> | AAAACGGCGACCGCAAAGCU. GCGGUUGcc.....guaACCGAUACGGCA. .AUGGGGCCGGAAAACAG         |
| <a href="#">NZ_CP007155/7090364-7090418</a> | AAAUGCAUUCGUAACGAA. CACGAA.....-AAUGAU CCGCA. .AUGUAGCGGUUUUGACA                |
| <a href="#">NC_011886/676358-676423</a>     | AUAUUCGCAACCGAAUGAC. CUGGGUCacga.....aagccGGAUUACAUGCG. .AAGGGGCAUCCAGCCAUG     |
| <a href="#">NC_021054/2187067-2187117</a>   | ACAAAUUCGUAUGCAAAGAA. GCAUCU-----UGUUAJCA. .ACGAAGUAUCUUGGUAGU                  |
| <a href="#">NC_015758/2187796-2187846</a>   | ACAAAUUCCUUGCAAAGAA. GCAUCU-----UGUUAJCA. .ACGAAGUAUCUUGGUAGU                   |
| <a href="#">NC_008769/2189421-2189471</a>   | ACAAAUUCCUUGCAAAGAA. GCAUCU-----UGUUAJCA. .ACGAAGUAUCUUGGUAGU                   |
| <a href="#">NZ_CP003494/1889021-1889071</a> | ACAAAUUCCUUGCAAAGAA. GCAUCU-----UGUUAJCA. .ACGAAGUAUCUUGGUAGU                   |
| <a href="#">NC_020245/2159066-2159116</a>   | ACAAAUUCCUUGCAAAGAA. GCAUCU-----UGUUAJCA. .ACGAAGUAUCUUGGUAGU                   |
| <a href="#">NC_016804/2168786-2168836</a>   | ACAAAUUCCUUGCAAAGAA. GCAUCU-----UGUUAJCA. .ACGAAGUAUCUUGGUAGU                   |
| <a href="#">NZ_AM412059/2171338-2171388</a> | ACAAAUUCCUUGCAAAGAA. GCAUCU-----UGUUAJCA. .ACGAAGUAUCUUGGUAGU                   |
| <a href="#">NC_012207/2171412-2171462</a>   | ACAAAUUCCUUGCAAAGAA. GCAUCU-----UGUUAJCA. .ACGAAGUAUCUUGGUAGU                   |
| <a href="#">NZ_CP014566/2171410-2171460</a> | ACAAAUUCCUUGCAAAGAA. GCAUCU-----UGUUAJCA. .ACGAAGUAUCUUGGUAGU                   |
| <a href="#">NZ_CP008744/2169564-2169614</a> | ACAAAUUCCUUGCAAAGAA. GCAUCU-----UGUUAJCA. .ACGAAGUAUCUUGGUAGU                   |
| <a href="#">NZ_CP009243/2171415-2171465</a> | ACAAAUUCCUUGCAAAGAA. GCAUCU-----UGUUAJCA. .ACGAAGUAUCUUGGUAGU                   |
| <a href="#">NZ_CP012095/2183860-2183910</a> | ACAAAUUCCUUGCAAAGAA. GCAUCU-----UGUUAJCA. .ACGAAGUAUCUUGGUAGU                   |
| <a href="#">NZ_CP009449/2147621-2147671</a> | ACAAAUUCCUUGCAAAGAA. GCAUCU-----UGUUAJCA. .ACGAAGUAUCUUGGUAGU                   |
| <a href="#">NZ_CP013741/2171711-2171761</a> | ACAAAUUCCUUGCAAAGAA. GCAUCU-----UGUUAJCA. .ACGAAGUAUCUUGGUAGU                   |
| <a href="#">NZ_HG813240/2173566-2173616</a> | ACAAAUUCCUUGCAAAGAA. GCAUCU-----UGUUAJCA. .ACGAAGUAUCUUGGUAGU                   |
| <a href="#">NC_020089/2191699-2191749</a>   | ACAAAUUCCUUGCAAAGAA. GCAUCU-----UGUUAJCA. .ACGAAGUAUCUUGGUAGU                   |
| <a href="#">NZ_CP002883/2173137-2173187</a> | ACAAAUUCCUUGCAAAGAA. GCAUCU-----UGUUAJCA. .ACGAAGUAUCUUGGUAGU                   |
| <a href="#">NZ_CP002882/2166350-2166400</a> | ACAAAUUCCUUGCAAAGAA. GCAUCU-----UGUUAJCA. .ACGAAGUAUCUUGGUAGU                   |
| <a href="#">NC_017522/2168763-2168813</a>   | ACAAAUUCCUUGCAAAGAA. GCAUCU-----UGUUAJCA. .ACGAAGUAUCUUGGUAGU                   |
| <a href="#">NZ_CP002885/2173333-2173383</a> | ACAAAUUCCUUGCAAAGAA. GCAUCU-----UGUUAJCA. .ACGAAGUAUCUUGGUAGU                   |
| <a href="#">NC_017524/2180824-2180874</a>   | ACAAAUUCCUUGCAAAGAA. GCAUCU-----UGUUAJCA. .ACGAAGUAUCUUGGUAGU                   |
| <a href="#">NC_021740/2181844-2181894</a>   | ACAAAUUCCUUGCAAAGAA. GCAUCU-----UGUUAJCA. .ACGAAGUAUCUUGGUAGU                   |
| <a href="#">NC_021194/2181480-2181530</a>   | ACAAAUUCCUUGCAAAGAA. GCAUCU-----UGUUAJCA. .ACGAAGUAUCUUGGUAGU                   |
| <a href="#">NC_009565/2195516-2195566</a>   | ACAAAUUCCUUGCAAAGAA. GCAUCU-----UGUUAJCA. .ACGAAGUAUCUUGGUAGU                   |
| <a href="#">NC_009525/2197160-2197210</a>   | ACAAAUUCCUUGCAAAGAA. GCAUCU-----UGUUAJCA. .ACGAAGUAUCUUGGUAGU                   |
| <a href="#">NZ_CP009480/2182565-2182615</a> | ACAAAUUCCUUGCAAAGAA. GCAUCU-----UGUUAJCA. .ACGAAGUAUCUUGGUAGU                   |
| <a href="#">NC_018143/2187268-2187318</a>   | ACAAAUUCCUUGCAAAGAA. GCAUCU-----UGUUAJCA. .ACGAAGUAUCUUGGUAGU                   |
| <a href="#">NC_000962/2187261-2187311</a>   | ACAAAUUCCUUGCAAAGAA. GCAUCU-----UGUUAJCA. .ACGAAGUAUCUUGGUAGU                   |
| <a href="#">NZ_CP007027/2186649-2186699</a> | ACAAAUUCCUUGCAAAGAA. GCAUCU-----UGUUAJCA. .ACGAAGUAUCUUGGUAGU                   |
| <a href="#">NZ_CP002871/2172407-2172457</a> | ACAAAUUCCUUGCAAAGAA. GCAUCU-----UGUUAJCA. .ACGAAGUAUCUUGGUAGU                   |
| <a href="#">NC_012943/2235762-2235812</a>   | ACAAAUUCCUUGCAAAGAA. GCAUCU-----UGUUAJCA. .ACGAAGUAUCUUGGUAGU                   |
| <a href="#">NC_016768/2232493-2232543</a>   | ACAAAUUCCUUGCAAAGAA. GCAUCU-----UGUUAJCA. .ACGAAGUAUCUUGGUAGU                   |
| <a href="#">NC_018078/2235643-2235693</a>   | ACAAAUUCCUUGCAAAGAA. GCAUCU-----UGUUAJCA. .ACGAAGUAUCUUGGUAGU                   |
| <a href="#">NC_020559/2178334-2178384</a>   | ACAAAUUCCUUGCAAAGAA. GCAUCU-----UGUUAJCA. .ACGAAGUAUCUUGGUAGU                   |
| <a href="#">NC_022350/2186892-2186942</a>   | ACAAAUUCCUUGCAAAGAA. GCAUCU-----UGUUAJCA. .ACGAAGUAUCUUGGUAGU                   |
| <a href="#">NZ_AP014573/2192698-2192748</a> | ACAAAUUCCUUGCAAAGAA. GCAUCU-----UGUUAJCA. .ACGAAGUAUCUUGGUAGU                   |
| <a href="#">NZ_CP010339/2185332-2185382</a> | ACAAAUUCCUUGCAAAGAA. GCAUCU-----UGUUAJCA. .ACGAAGUAUCUUGGUAGU                   |
| <a href="#">NZ_CP010337/2190192-2190242</a> | ACAAAUUCCUUGCAAAGAA. GCAUCU-----UGUUAJCA. .ACGAAGUAUCUUGGUAGU                   |
| <a href="#">NZ_CP010340/2199709-2199759</a> | ACAAAUUCCUUGCAAAGAA. GCAUCU-----UGUUAJCA. .ACGAAGUAUCUUGGUAGU                   |
| <a href="#">NZ_CP010338/2182762-2182812</a> | ACAAAUUCCUUGCAAAGAA. GCAUCU-----UGUUAJCA. .ACGAAGUAUCUUGGUAGU                   |
| <a href="#">NZ_CP009426/2167819-2167869</a> | ACAAAUUCCUUGCAAAGAA. GCAUCU-----UGUUAJCA. .ACGAAGUAUCUUGGUAGU                   |
| <a href="#">NZ_CP009427/2195453-2195503</a> | ACAAAUUCCUUGCAAAGAA. GCAUCU-----UGUUAJCA. .ACGAAGUAUCUUGGUAGU                   |
| <a href="#">NZ_CP010330/2194218-2194268</a> | ACAAAUUCCUUGCAAAGAA. GCAUCU-----UGUUAJCA. .ACGAAGUAUCUUGGUAGU                   |
| <a href="#">NZ_CP007809/2166335-2166385</a> | ACAAAUUCCUUGCAAAGAA. GCAUCU-----UGUUAJCA. .ACGAAGUAUCUUGGUAGU                   |
| <a href="#">NZ_CP012506/2160992-2161042</a> | ACAAAUUCCUUGCAAAGAA. GCAUCU-----UGUUAJCA. .ACGAAGUAUCUUGGUAGU                   |
| <a href="#">NZ_CP009100/2187257-2187307</a> | ACAAAUUCCUUGCAAAGAA. GCAUCU-----UGUUAJCA. .ACGAAGUAUCUUGGUAGU                   |
| <a href="#">NZ_CP009101/2187289-2187339</a> | ACAAAUUCCUUGCAAAGAA. GCAUCU-----UGUUAJCA. .ACGAAGUAUCUUGGUAGU                   |
| <a href="#">NZ_CP012090/1954309-1954359</a> | ACAAAUUCCUUGCAAAGAA. GCAUCU-----UGUUAJCA. .ACGAAGUAUCUUGGUAGU                   |
| <a href="#">NZ_CP013747/2249980-2250041</a> | CCAGAACCCCGACAAUGAU. GUCCGAUCcu.....cacAUUCUCAUCACG. .AAGGAGUGACCAGUGACA        |
| <a href="#">NZ_CP015773/1085783-1085833</a> | ACAAAUUCCUUGCAAAGAA. GCAUCU-----UGUUAJCA. .ACGAAGUAUUUUGGUAGU                   |
| <a href="#">NZ_CP012590/627231-627295</a>   | ACGGGGCGGAUGACAACGAU. GUCAUCGgaa.....agaaCUGUACCUAGACA. .ACGUUGUCUCCGGUCAAG     |
| <a href="#">NC_008541/399351-399411</a>     | AUGAAGCCCAACCAAGAU. GUUGUGGca.....aaAGAACAUAUACA. .AAGGGGUAAGAAGUCAAU           |
| <a href="#">NC_015738/2403432-2403484</a>   | UCAUAUGAUCCCAACAGUGAA. GUUGC-----CAAAAAGGCA. .GCGAAGCUUCAACGGAA                 |

NZ\_CP016771/508869-508923 AACCUCUCAGCGGCAAGAC. GCCGUA- . . . . . CUGACAGGUA. . CUGAUGACAAAACUAAAA  
NZ\_AP012327/2246903-2246953 ACGCUCAUAAUCGAAACGAU. UCGAA- . . . . . AGUAAGCG. . AAGACGCUGAAAACGAAG  
NZ\_CP007287/1150528-1150582 GCAAGUAAGGGCUCACAAAGUU. GAGCCA- . . . . . UGAUGAUUGCA. . AUGUAGCAAAAUAACAAG  
NZ\_LT706985/1778691-1778741 ACCUAAAUUGAAACAAAGGA. GUUU- . . . . . GUCGUGGA. . AAGAAGCCUCCACUCGA  
NZ\_CP008953/3466226-3466279 AAAGUAACAGAUACACGAC. GUAUC- . . . . . CCUUAUC AUG. . ACGGUAUGCUCAGCGAAG  
NZ\_CP013200/2964252-2964307 AUUUUAUAGCAUC- UAAUGGU. GCGAUU. . . . . AUGCACAUAUCA. . AAGGAGAAUCAUGACAGA  
NZ\_CP006018/1129860-1129914 GCAAGUAAGGGCUCACAAAGUU. GAGCG- . . . . . UGAUGAUUGCA. . AUGUAGCAAAAUAACAAG  
NC\_013165/1700444-1700501 GUACGUGAAAAGC AACGGU. GCUUUUU. . . . . gAAGGC AAGCA. . AUGGUUCUUAUAAAAAG  
NC\_015673/784296-784358 CUUGUAUACGAGCAAGAA. GUCGAGCaac. . . . . gagUCCUUCUUGCA. . AAGGCUCUAGAGAGGUG  
NC\_008541/3967947-3968005 UUCAUUCGAGCC AACGAC. GUCUUCUa. . . . . cGGAGGUAAGCA. . AUGAAGUUUCUGCCAUG  
NZ\_CP016777/10943-11014 AACAAAUUCUUAAC AAGGCU. GUUGUCCacggcaa. . . . . aguauuuUGUCUUCAGCA. . AAGAGGCUUUAUCUACG  
NC\_017219/918010-918066 UAGCGAUUUUGUGCA AUGAU. GCACGAG. . . . . CCGAUCCAAGCA. . AAGGGGCUGACCAUGAGC  
NC\_011593/918219-918275 UAGCGAUUUUGUGCA AUGAU. GCACGAG. . . . . CCGAUCCAAGCA. . AAGGGGCUGACCAUGAGC  
NC\_016582/1325572-1325634 ACAUAAAACUCACAAAGGU. GUUGUUUuau. . . . . agcAUUGAGCAUGAA. . UCGGAUACUCUGUGAAG  
NC\_014218/625569-625621 GUUCAUUAUCUCUAAUGAA. GAGAA- . . . . . AGAUACA. . AAGGAGUUGUAGGCGCAU  
NZ\_CP014513/1628135-1628207 UGACGCCGAUUAAC AACGAU. GUAAUAGucgaugga. . . . . gcacccacCCUACGAAGCA. . AUGGAGCUCCAUGUCGAC  
NZ\_CP012649/324715-324777 AAAAAGCCGUAGCC AACGCU. GUUUUUGGca. . . . . aagGAAACAAGAAC. . AUGACGUUUUUGGUUAA  
NZ\_CP024160/94937-94997 GCGAUGGCAGCGGCAUGAU. GCCGUUGGga. . . . . gcCAAACAUAAGCA. . AUGCUUCUUAAGUACGUAA  
NC\_009338/1209116-1209171 UGAGAGAUCACCCACAAAGGU. GUGGUU- . . . . . GACUACAGGGCA. . AUUGGCCGGACUCGGGG  
NC\_014814/5213312-5213367 UGAGAGAUCACCCACAAAGGU. GUGGUU- . . . . . GACUACAGGGCA. . AUUGGCCGGACUCGGGG  
NC\_015671/2826867-2826924 CAUGGUUCUUCUAC AACGAU. GUAGAAC. . . . . gACGACGAUCGGC. . AGGGAGCGAGUCGAUGGG  
NC\_015564/650876-650926 UACGUCUUAAGCGCAACGAC. GCGCU- . . . . . UACGGCA. . AUGCUGCCGGAGCCACGA  
NZ\_CP016282/3698598-3698660 AACGAUCCAUGGAAACGAU. UCCAUAAGgau. . . . . ccaCGCACGUAACA. . AGGGAGUGGCUUGGGAAG  
NZ\_AP017900/6584176-6584229 CUUCCACCAAAGCC AACGGC. GCCGC- . . . . . UGCGAAUGGCA. . ACGGAGCCAACGGGAAUG  
NZ\_CP017839/2299999-2300052 CUUCCACCAAAGCC AACGGC. GCCGC- . . . . . UGCGAAUGGCA. . ACGGAGCCAACGGGAAUG  
NC\_011886/95577-95640 AUUCUAUGAAAUGCA AUGAC. GCGCAGUgaa. . . . . aaggAAUCCAUAGCA. . ACGGAGUCAGUGACGAGC  
NZ\_LT906481/1654874-1654930 ACGGUUCCCAAGCC AACGGC. GCCGUA. . . . . AGGGUGCAGGCA. . ACGGUGCCGACAGGGUG  
NZ\_CP007443/2169079-2169133 ACGGUUCCCAAGCC AACGGC. GCCGUA. . . . . AGGGUGCAGGCA. . ACGGUGCCGACAGGGUG  
NZ\_AP012325/603559-603619 GCUUAUACAUAUGAACGGU. UAGAUAU- . . . . . GAUAUGAUAUCA. . AAGGAGAUUCAUAGAGG  
NZ\_CP017812/1397258-1397314 CUAACAGAAUUGCAACGGU. GCAAUAUCc. . . . . gaAACAGACGGCG. . ACGUUGCCAUAGAAGAAA  
NC\_013165/1987700-1987750 ACAAGCUUAUGCC AACGGU. GCCAUUA. . . . . UGCGUUUGGUG. . AAGAUACUCGUCCCAAG  
NZ\_CP012649/1421966-1422025 AUCUGAUGUCUGAGAAAGUC. CUCAUG- . . . . . AAGGGCA. . ACGAGGCCAUGGCUGAAG  
NZ\_CP007519/848348-848407 AAUGUGAUCACUGCAGAGGA. GCAGUGAa. . . . . gcAGACCACUUAACG. . AAGGAGUAACUGUGAGG  
NZ\_CP007003/794541-794600 AAUGUGAUCACUGCAGAGGA. GCAGUGAa. . . . . gcAGACCACUUAACG. . AAGGAGUAACUGUGAGG  
NZ\_CP006841/144531-144587 AAUGUGAUCACUGCAGAGGA. GCAGUGAa. . . . . gcAGACCACUUAACG. . AAGGAGUAACUGUGAGG  
NC\_008618/1609471-1609525 CCGGCCUCUGCAGCAGAGUU. GUCGAA. . . . . CCUACGAAGGCA. . AAGAGGCCGCCACAAGG  
NZ\_CP007699/6061131-6061192 GUAAUAUCAUAUCU AACGGU. UAGAUAU- . . . . . GAUAUGAUAUCA. . AAGGAGAUUCAUAGAGG  
NZ\_AP014658/2161620-2161684 UACAGGUUGCGCC AACGAC. GCGGACGgc. . . . . acaAGCAGAAUGGCA. . ACGGCGCCAUGGGCAACA  
NC\_014656/1762029-1762093 AUAACA AAUAUUGCGAUGGC. GCAACGAugau. . . . . ccacACAGUAUUGCA. . AAGAAGCAAGGACCCAAG  
NZ\_CP016019/2295537-2295601 AUAACA AAUAUUGCGAUGGC. GCAACGAugau. . . . . ccacACAGUAUUGCA. . AAGAAGCAAGGACCCAAG  
NZ\_CP011965/1681266-1681330 AUAACA AAUAUUGCGAUGGC. GCAACGAugau. . . . . ccacACAGUAUUGCA. . AAGAAGCAAGGACCCAAG  
NZ\_CP008802/1251722-1251774 ACGUUUCCAUAAACAAAGUA. GUUU- . . . . . GACACCCUGCA. . GCGAGCGAGUAUAUAUG  
NZ\_CP006713/1022299-1022374 AUUGCAGCAGUAACAAAGAU. GUUGUGUauugcauuccuuuaaggagAGUGAACGAGCA. . UGGGCUCUGCAGAAAAA  
NC\_020517/419361-419436 AUUGCAGCAGUAACAAAGAU. GUUGUGUauugcauuccuuuaaggagAGUGAACGAGCA. . UGGGCUCUGCAGAAAAA  
NZ\_CP022436/2248139-2248195 CCACUGAUAACAC AACGUC. GUGUAAA. . . . . ACCCGGUGGCG. . AAGUAGCCGCCGACGAGG  
NC\_021064/2362500-2362551 UAAUCCAUAUUUAC AACGAU. GUAA- . . . . . CGGAACAUGCA. . A- GGNGCCGCGGAGAGC  
NC\_014246/26799-26853 UGAUGCAUAUCC AACGAU. GUGAUA- . . . . . CCGAACUGCA. . AAGGAGACUGAUGUCC  
NZ\_CP006715/665275-665329 GCAGGGAUUCUAACAGUGAU. GUAUGA- . . . . . ACCAUUGGCA. . AUGAUGCUGAGAGAAAGG  
NC\_013947/4871519-4871574 UUGAAUUGAGUCGCAAAAGGA. GCGAAG- . . . . . AUGUCUGUGGCC. . AAGUUGCCAGUGCCGGU  
NZ\_CP006850/7697910-7697964 GAUCAGUAACACACAAAGGA. GUGUUC- . . . . . UGAUGCAGGCA. . UCGUUGCCAGCAUGGUG  
NZ\_CP017150/3576710-3576760 AAAAAGACGGUGACAAUGAC. GUUGA- . . . . . CGGUGACA. . AGGGGUGCAGCACAGUGG  
NZ\_CP006842/641767-641835 AUACAACAGCCCGCCAAUGAU. GCCGACAgcguag. . . . . gacaccAGCAAGGAGUCC. . ACGAAGACCUACUGAAU  
NC\_009342/714064-714117 CCGUCGAUAUCGACAAAGUU. GUCGC- . . . . . GCUUGUUUGCA. . CCGGAGCAUAGGCGAGU  
NC\_021351/701063-701116 CCGUCGAUAUCGACAAAGUU. GUCGC- . . . . . GCUUGUUUGCA. . CCGGAGCAUAGGCGAGU  
NC\_021352/701064-701117 CCGUCGAUAUCGACAAAGUU. GUCGC- . . . . . GCUUGUUUGCA. . CCGGAGCAUAGGCGAGU  
NZ\_CP007724/625963-626016 CCGUCGAUAUCGACAAAGUU. GUCGC- . . . . . GCUUGUUUGCA. . CCGGAGCAUAGGCGAGU  
NZ\_CP007722/656779-656832 CCGUCGAUAUCGACAAAGUU. GUCGC- . . . . . GCUUGUUUGCA. . CCGGAGCAUAGGCGAGU  
NZ\_CP012117/21017-21071 AAGUAGUCCUAAGCA AUGGC. GUCUC- . . . . . UGCCUAAGUCA. . GCGAUGACAGCGACGGGA  
NZ\_CP006711/1516055-1516111 CAGGGGCUUCGUGCA AUGAU. GCACGAG. . . . . CCGAUCCAAGCA. . AAGGGGCUGACCAUGAGC  
NZ\_CP006715/1592334-1592390 CAGGGGCUUCGUGCA AUGAU. GCACGAG. . . . . CCGAUCCAAGCA. . AAGGGGCUGACCAUGAGC  
NC\_017218/652499-652555 CAGGGGCUUCGUGCA AUGAU. GCACGAG. . . . . CCGAUCCAAGCA. . AAGGGGCUGACCAUGAGC  
NZ\_AP012324/1590628-1590684 CAGGGGCUUCGUGCA AUGAU. GCACGAG. . . . . CCGAUCCAAGCA. . AAGGGGCUGACCAUGAGC  
NZ\_CP006712/1542383-1542439 CAGGGGCUUCGUGCA AUGAU. GCACGAG. . . . . CCGAUCCAAGCA. . AAGGGGCUGACCAUGAGC  
NZ\_CP006713/1627645-1627701 CAGGGGCUUCGUGCA AUGAU. GCACGAG. . . . . CCGAUCCAAGCA. . AAGGGGCUGACCAUGAGC  
NZ\_CP006714/1543740-1543796 CAGGGGCUUCGUGCA AUGAU. GCACGAG. . . . . CCGAUCCAAGCA. . AAGGGGCUGACCAUGAGC  
NZ\_CP006716/1587761-1587817 CAGGGGCUUCGUGCA AUGAU. GCACGAG. . . . . CCGAUCCAAGCA. . AAGGGGCUGACCAUGAGC  
NZ\_CP010413/521165-521221 CAGGGGCUUCGUGCA AUGAU. GCACGAG. . . . . CCGAUCCAAGCA. . AAGGGGCUGACCAUGAGC  
NZ\_CP019596/1647336-1647392 CAGGGGCUUCGUGCA AUGAU. GCACGAG. . . . . CCGAUCCAAGCA. . AAGGGGCUGACCAUGAGC  
NC\_020517/1647321-1647377 CAGGGGCUUCGUGCA AUGAU. GCACGAG. . . . . CCGAUCCAAGCA. . AAGGGGCUGACCAUGAGC  
NZ\_CP008885/1607611-1607667 CAGGGGCUUCGUGCA AUGAU. GCACGAG. . . . . CCGAUCCAAGCA. . AAGGGGCUGACCAUGAGC



NC\_014169/1608182-1608238 CAGGGGCUUCGUGCAAUGAU. GCACGAG. . . . . CCGAUCCAAGCA. . AAGGGGCUACCAUGAGC

NZ\_AP012332/713494-713559 AGAAUUUAUUCUCACACAGGA. GUGACGAUgac. . . . . uacaaAAGAAAACGACA. . AUGCCGUCGUUUAAGAAUA

NC\_014644/852601-852666 AGAAUUUAUUCUCACACAGGA. GUGACGAUgac. . . . . uacaaAAGAAAACGACA. . AUGCCGUCGUUUAAGAAUA

NC\_017456/1045532-1045597 AGAAUUUAUUCUCACACAGGA. GUGACGAUgac. . . . . uacaaAAGAAAACGACA. . AUGCCGUCGUUUAAGAAUA

NZ\_CP011269/6251522-6251576 GAGUUCUUAAGUUAACAAAGGU. GUAGUU. . . . . -CGAUUGC GGCG. . ACGGU GCCGUAGGGGAGUG

NZ\_CP009914/6321128-6321182 GAGUUCUUAAGUUAACAAAGGU. GUAGUU. . . . . -CGAUUGC GGCG. . ACGGU GCCGUAGGGGAGUG

NZ\_CP015732/54428-54483 UACUUGCAGAAUUC AACCGU. GAAUAU. . . . . UCAUAAGGAGCA. . AGGGU GCUUUCUACAAGAC

NZ\_AP012322/1863064-1863117 AUUUUCUGUGGCAAACAGCA. UUGUU. . . . . -UUAACGAUGCA. . AUGGC GCAUUGGGCCAGA

NZ\_AP012325/1858280-1858333 AUUUUCUGUGGCAAACAGCA. UUGUU. . . . . -UUAACGAUGCA. . AUGGC GCAUUGGGCCAGA

NC\_020133/3552989-3553040 GUUAUACCGACGGCAGAGUG. GUCGU. . . . . -GCCUUUGCA. . AAGGC GCAGCCAACUAAG

NZ\_HG917972/2705617-2705668 GUUAUACCGACGGCAGAGUG. GUCGU. . . . . -GCCUUUGCA. . AAGGC GCAGCCAACUAAG

NC\_010612/2842712-2842763 GUUAUACCGACGGCAGAGUG. GUCGU. . . . . -GCCUUUGCA. . AAGGC GCAGCCAACUAAG

NZ\_CP007456/334670-334721 UGCGAAAUACGACAAUGAA. GUGCA. . . . . -UAUCAUGCA. . UAGGAGCAGUAUUUCCG

NC\_013165/1226733-1226789 AUAAGAAGUUCGGCAAAGGU. GCCAUCA. . . . . UGAAGCUUGGGC. . AAGAU GCCGAAAGCUGG

NZ\_CP023445/4013130-4013182 UCCUGCUGAUCCGCAAUGGC. GCCA. . . . . -AGGAGCU GGCA. . AUGCC GCCCAGGCCGAGG

NZ\_CP016775/10992-11063 AACAAAUCGCAACAAGCU. GUUGUCCacggcaa. . . . . agugauccUAUCUUC GGUA. . UCGAAGCUGAUUACUACG

NC\_004369/2288328-2288390 AAGACAUGAUCCACAUCCG. GUGGCUgucg. . . . . acaGCACCUGCGG. . AUGAU GCUUGCUGCGACG

NZ\_CP017297/3019293-3019349 GGGAACACGU CGACAUCCG. GUCG AUG. . . . . GUGUUGUC CGCA. . GUGGU GCGGGCGAUGAUU

NZ\_CP017297/753990-754046 GGGAACACGU CGACAUCCG. GUCG AUG. . . . . GUGUUGUC CGCA. . GUGGU GCGGGCGAUGAUU

NZ\_CP017297/3849285-3849341 GGGAACACGU CGACAUCCG. GUCG AUG. . . . . GUGUUGUC CGCA. . GUGGU GCGGGCGAUGAUU

NC\_021251/2174956-2175006 ACAAAUCCAUUGCAAAAA. GCAU. . . . . -UGUUAUCA. . ACGAAGUAUCUUGGUAGU

NC\_013729/2485796-2485859 AAAGUUGCUCUUGCAUCGAU. GCAAUUCgcu. . . . . agugAAGAUGCUUGCA. . ACGAU GCAAACGCCAC

NC\_014550/976738-976792 UUGAUCUGCUCCACAGCGU. UUGAU. . . . . -GGUCCUUGCA. . AAGU GGAUGAGUGUUAU

NZ\_CP007456/2161708-2161764 GUUAUCCAUAAUCGAAACGAU. UCGAAAG. . . . . UAAGUGAAGGGC. . UUGUA GCCGAAGCGAAGA

NC\_017219/47851-47907 GUUAUCCAUAAUCGAAACGAU. UCGAAAG. . . . . UAAGUGAAGGGC. . UUGUA GCCGAAGCGAAGA

NC\_011593/48060-48116 GUUAUCCAUAAUCGAAACGAU. UCGAAAG. . . . . UAAGUGAAGGGC. . UUGUA GCCGAAGCGAAGA

NZ\_AP012330/2073001-2073057 GUUAUCCAUAAUCGAAACGAU. UCGAAAG. . . . . UAAGUGAAGGGC. . UUGUA GCCGAAGCGAAGA

NZ\_CP007803/2159806-2159856 ACAAAUCCAUUGUAAAGAA. GCAU. . . . . -UGUUAUCA. . ACGAAGUAUCUUGGUAGU

NZ\_CP007003/1952893-1952949 CAUAGUUCUUCACAAAGGA. GAGAAGG. . . . . AUGAACAGACA. . AGGUU GUCGCUUCCGCG

NC\_013714/299223-299280 GACAAUUAUUUACACGAU. GUAUAU. . . . . aGCGCAUUAUCA. . ACGUU GUAACAAUUGACA

NZ\_AP012326/299225-299282 GACAAUUAUUUACACGAU. GUAUAU. . . . . aGCGCAUUAUCA. . ACGUU GUAACAAUUGACA

NZ\_AP012322/787294-787346 UUGAUCCAAGGCGCAAGGCC. GCUUU. . . . . -GACACUGCA. . UUGGC GCAGGUGGAGAAG

NZ\_CP014241/1353009-1353061 UUGAUCCAAGGCGCAAGGCC. GCUUU. . . . . -GACACUGCA. . UUGGC GCAGGUGGAGAAG

NZ\_CP017717/9630535-9630594 GAUGCUCUGCGGGGGUGAC. GCCGACAc. . . . . guCAUUA AAAAGGCA. . AUGGAGCCUGGAAAAUU

NC\_021055/2739768-2739826 CCAUUCGUCGCAACAAGAU. GUUGCUCg. . . . . aAAUUCGAAUGCA. . ACGUAGCGUUUCUGUAU

NZ\_CP011269/4166579-4166635 UAGGUGAACUCAGCAAAGCU. GCUUU. . . . . GGGCGCGCGCA. . ACGUAGCGCUGACCGGUC

NZ\_CP006841/2631106-2631157 GCCUUGGCAAACGGCAACCGU. GCUUG. . . . . -CAUUCGGCA. . UUGUC GCCUGUGGUGAUG

NZ\_CP018135/1224475-1224527 CCAUGUUUGGCGUCAAUGCU. GGGGCU. . . . . -AAGCGCGC. . AAGAAGCGUGCCGCAAA

NZ\_CP012182/279030-279077 AUCGAAUUUGCCCCACGGGU. GGGG. . . . . -UAAGGCA. . AGGAC GCCCGGAGCAGA

NZ\_CP012185/769514-769561 AUCGAAUUUGCCCCACGGGU. GGGG. . . . . -UAAGGCA. . AGGAC GCCCGGAGCAGA

NZ\_CP013254/515543-515592 CUUACACUACGUGCAUUGU. GCACA. . . . . -CAGUUAUCA. . AAGUUGCACGGCGUGCAA

NZ\_CP020468/414732-414788 GCUGGAUGCGCGAGAACGAG. UUGCUG. . . . . ACAUC AAGACA. . ACGCAUGCCUCUCGAAA

NZ\_CP009251/301569-301620 UCGGUUAUCUCUUAACGUU. UGAGU. . . . . -AAGAAAGCA. . AAGCU GCUUAUCAUAAU

NZ\_CP012649/305936-305991 UAGAAGCUCUAGGCAAAGAU. GCCUAA. . . . . GCAUCCAUCUCA. . AAGUCGAGUGAACCCUCC

NZ\_CP007519/1995247-1995302 UAGAAGCUCUAGGCAAAGAU. GCCUAA. . . . . GCAUCCAUCUCA. . AAGUCGAGUGAACCCUCC

NZ\_CP007003/1911013-1911068 UAGAAGCUCUAGGCAAAGAU. GCCUAA. . . . . GCAUCCAUCUCA. . AAGUCGAGUGAACCCUCC

NZ\_LT706985/764823-764873 AACUUCUUAUAGACAUAGAA. GUUAU. . . . . -CAUUGCA. . AUGAUGGCUCAACUGAUA

NC\_014218/40752-40799 CUCUAUCCACGGCAAUGAU. GCCG. . . . . -AUUCA. . UAGAGGAGUAAAAGAAC

NC\_013530/474820-474871 UCCGACACUUC -CACUGGA. GAGA. . . . . -AGGACAA CGCA. . AUGAAGCGUCUUAACAAG

NZ\_CP004350/282795-282854 GUCAAACGCUCCGCCCGAA. GUGGUUGa. . . . . agCUAAUUC CGCA. . AUGGC GCGGGGACCAAG

NC\_010545/547036-547092 UACAUGUCCAGGGCGAUGAU. GCCUUC. . . . . UUGAGGCGGGCA. . CCGGC GCCGUCGUAGAAA

NC\_020230/536435-536491 UACAUGUCCAGGGCGAUGAU. GCCUUC. . . . . UUGAGGCGGGCA. . CCGGC GCCGUCGUAGAAA

NZ\_LT906481/2232424-2232480 UACAUGUCCAGGGCGAUGAU. GCCUUC. . . . . UUGAGGCGGGCA. . CCGGC GCCGUCGUAGAAA

NC\_013131/8698208-8698262 CGGUAGAUAUCGACAAUGGU. GUUGUC. . . . . CUAAUAAGACA. . AUGAGGUUGUGAUCGUG

NZ\_CP011269/3804230-3804294 UCGAGUUAUCUCCAAUGCC. GGGGCGUgcuu. . . . . ggcgACGACCAA CGUG. . AUGGAACGUCGUGGCAAG

NZ\_CP012477/315774-315838 UCAUGCCAGUAUCAAGAC. GGUGACggucc. . . . . accgGAGGUUAUUAUCA. . AUGAAGAUACCCACAAA

NZ\_CP009244/2657682-2657735 AACUUGCAAACUACACCGU. GUAU. . . . . -UUUGCGAGCA. . AUUGCGCUGGUGUAGGGG

NZ\_CP019705/2744264-2744317 AACUUGCAAACUACACCGU. GUAU. . . . . -UUUGCGAGCA. . AUUGCGCUGGUGUAGGGG

NZ\_CP014634/2038187-2038240 UCGAUUCCUACCAUAGAC. GUUGA. . . . . -GGUUGCAUCA. . GUGAU GAUGGGCGCCACC

NZ\_CP014635/2075643-2075696 UCGAUUCCUACCAUAGAC. GUUGA. . . . . -GGUUGCAUCA. . GUGAU GAUGGGCGCCACC

NZ\_CP021252/737452-737505 UCGAUUCCUACCAUAGAC. GUUGA. . . . . -GGUUGCAUCA. . GUGAU GAUGGGCGCCACC

NZ\_CP012649/1400498-1400555 UCUGUCAGCGUCGCGAAGGU. GCCAUG. . . . . uAUGAAAGGUGCA. . AAGAU GCCCAUGGAAA

NZ\_CP007519/869818-869875 UCUGUCAGCGUCGCGAAGGU. GCCAUG. . . . . uAUGAAAGGUGCA. . AAGAU GCCCAUGGAAA

NZ\_CP007003/773074-773131 UCUGUCAGCGUCGCGAAGGU. GCCAUG. . . . . uAUGAAAGGUGCA. . AAGAU GCCCAUGGAAA

NC\_013203/420130-420185 UUCAUUUCUUAACAAAAGAC. UUGUAG. . . . . AAGUGAUCUGCU. . AUGAAGCAUAAAAUUUCA

NC\_019673/5436821-5436887 UGAUUAUUUAACGCAACGUA. GCGUUUCgacua. . . . . ucagaAACACGGAGCA. . CAGGAGCUGAGCACGAUG

NC\_013714/2559797-2559866 AAUGACUUAUCUACAUUGA. GUAGUUAAGgaau. . . . . cugccccGACACAGUAGCA. . AAGGAGCUCACGAACAUG

NZ\_AP012326/2559099-2559168 AAUGACUUAUCUACAUUGA. GUAGUUAAGgaau. . . . . cugccccGACACAGUAGCA. . AAGGAGCUCACGAACAUG

NZ\_CP007457/254651-254719 CCGAACAAUUGUAACAGUU. GUUAUACcugcua. . . . . uauucaACGAUGUAACA. . UUGGC GUUUAUGAGAAAG

NZ\_AP017457/676069-676125 ACUUAUCUACAACAAAUGGA. UUGUCG. . . . . CGGUUCCGGCA. . AAUUC GCCACUAGACUUU

NC\_019395/2388576-2388629 GUCGCCUUAUCUUGCAUCGGC. GCAAC. . . . . -AUUGGAAACA. . AUGGAGUUUGGAAAAUU

NZ\_CP014352/962972-963025 GUCGCCUUACUUGCAUCGGC. GCAAC-- . . . . . -AUUUGGAAACA. . AUGGAGUUUGUAAAAAUU  
NZ\_CP013126/2384398-2384451 GUCGCCUUACUUGCAUCGGC. GCAAC-- . . . . . -AUUUGGAAACA. . AUGGAGUUUGUAAAAAUU  
NZ\_CP015970/1261613-1261666 GUCGCCUUACUUGCAUCGGC. GCAAC-- . . . . . -AUUUGGAAACA. . AUGGAGUUUGUAAAAAUU  
NZ\_CP019400/905646-905699 GUCGCCUUACUUGCAUCGGC. GCAAC-- . . . . . -AUUUGGAAACA. . AUGGAGUUUGUAAAAAUU  
NZ\_CP011853/1991447-1991503 UGAAGGCUCGUCGCAUUGAA. GCGAAG. . . . . CCGCUGCGUGC. . ACGUCGACGAGGGCGAUA  
NC\_013521/337144-337211 CAACGUUGUCUACACGUAU. GUAAUGGggaau. . . . . ccugaAAGGACACCGCA. . AUGAAGCGCAUCCCUCC  
NZ\_CP011005/1447414-1447470 AGCGCCUGCAACCAUGUC. GUGGCCA. . . . . CGUUUUUUA. . AUGGUAGAGAAAGCAGAAA  
NC\_004369/2797242-2797301 GUGCAGCAGACGCAUUGUC. GUCGACGc. . . . . cgAGGUCGUGGACG. . AGGAUGUCUCCGAGGAGA  
NZ\_LT906441/1211974-1212044 UAUUUUAGUUCCACAGCAUU. GUGGGAUgaagcca. . . . . aggaggaAAUAUACAUUGCA. . AAGAAGACUCAUGUGGCA  
NC\_016887/425172-425232 GUGACGGUAGACACAAAGGA. GUGCUCUga. . . . . ugCUGGUAAGUGC. . AUGAAGACGUCUGGCGCAG  
NZ\_CP008944/1161153-1161209 AACACCGCAACCUACGUAU. GAGGAAC. . . . . UGCGCAGGUCA. . ACGAGGAUCUCUACGGCC  
NZ\_CP007457/59941-59994 AUCGAGAUCACAGCAGAGAC. GUCUGU-- . . . . . -ACAUUCCGUCG. . AAGGAGUUGGAGCAGAUG  
NZ\_CP022544/60793-60846 AUCGAGAUCACAGCAGAGAC. GUCUGU-- . . . . . -ACAUUCCGUCG. . AAGGAGUUGGAGCAGAUG  
NZ\_AP017900/552424-552477 UCUAGUAGUAACACAAAGGA. GUGUC-- . . . . . -CUAUGCGGGCA. . AUGCUGCCUCACUCUUG  
NZ\_CP017839/204678-204731 UCUAGUAGUAACACAAAGGA. GUGUC-- . . . . . -CUAUGCGGGCA. . AUGCUGCCUCACUCUUG  
NZ\_CP017639/282870-282926 AGGCAGCCGACGCAACGUC. GUCGACG. . . . . CCGAGGUUGUCG. . ACGAAGACACCGACGAAA  
NZ\_CP014513/4176027-4176083 UUGACGGCGUUAUCGUAU. GUACUA. . . . . CUGGCUAUUACA. . ACGAUUAUCUGAAGGAG  
NZ\_CP013200/2477270-2477335 CCAUCAAGUAUCUACGAC. GGAGAUcucgu. . . . . cgaagGUGUAGUUUGCA. . AGGUUGACCGCGCAGGAG  
NZ\_CP012171/1710341-1710406 AACGUACUUGCGGGGAUGAU. CCUGUUAcccc. . . . . gcaccACCGCAAAAGCA. . AUGGUUCUUCUCGGUG  
NZ\_CP013297/2161633-2161698 AACGUACUUGCGGGGAUGAU. CCUGUUAcccc. . . . . gcaccACCGCAAAAGCA. . AUGGUUCUUCUCGGUG  
NC\_022438/1814538-1814594 GCAGCAUUUCUUAUGUC. GGGACA. . . . . AGUUUAUUGCA. . AAGGAGCAUAUGUCCUG  
NC\_009480/2749689-2749746 GCGCUUCGCAUUACACGUAU. GUAAAGA. . . . . uCGGCAUCACA. . AAGGAGUGGUCAUUGGUAU  
NZ\_CP009244/2166366-2166420 CUUAAUGAAAAGGCAACGGA. GCUUCU- . . . . . -CGAAGACGUCG. . AAGAAGACUAUGACCUUG  
NZ\_CP019705/2252952-2253006 CUUAAUGAAAAGGCAACGGA. GCUUCU- . . . . . -CGAAGACGUCG. . AAGAAGACUAUGACCUUG  
NZ\_CP012647/246614-246678 CUGAUGAGAGCAGCACAGCA. GUCUGAGcuc. . . . . gaguCCUUUGGAAGCA. . AAGAGGCUUAUGACCAGC  
NC\_017550/1142874-1142938 CUGAUGAGAGCAGCACAGCA. GUCUGAGcuc. . . . . gaguCCUUUGGAAGCA. . AAGAGGCUUAUGACCAGC  
NC\_016512/146779-146843 CUGAUGAGAGCAGCACAGCA. GUCUGAGcuc. . . . . gaguCCUUUGGAAGCA. . AAGAGGCUUAUGACCAGC  
NC\_016511/146788-146852 CUGAUGAGAGCAGCACAGCA. GUCUGAGcuc. . . . . gaguCCUUUGGAAGCA. . AAGAGGCUUAUGACCAGC  
NC\_016516/146791-146855 CUGAUGAGAGCAGCACAGCA. GUCUGAGcuc. . . . . gaguCCUUUGGAAGCA. . AAGAGGCUUAUGACCAGC  
NZ\_CP019304/3170621-3170678 AUUUAUAGUUGGAAAGCGUU. UUCUCA. . . . . uCCUUAAGAUCA. . AAGAAGAUCCGAGUGAAC  
NC\_013441/3539601-3539668 AUCAUGUUCUGGAGGGAC. GUCGUUGaaggg. . . . . agcuugAGAAUGGCAGCA. . AUGAAGCCACGUACUGGG  
NZ\_CP009251/658185-658236 GCGUUUACACGCGCACGAU. GUGCU-- . . . . . -UAGUACGCA. . AGGAUGCGGUUUAUAGU  
NZ\_CP022054/276098-276155 AUCAAUAUUAU- CACGGAG. GUAAAUUGu. . . . . gCGAGUAUCGCA. . AUGACGCGGCGGUGACG  
NZ\_CP008913/2170035-2170092 AUCAAUAUUAU- CACGGAG. GUAAAUUGu. . . . . gCGAGUAUCGCA. . AUGACGCGGCGGUGACG  
NC\_009077/2700344-2700396 AACAUUCGUUCCGCAUUGAG. GUGGAU- . . . . . -CGGACCGCA. . AGGGUUGCGGACGACGAAA  
NC\_008705/2714603-2714655 AACAUUCGUUCCGCAUUGAG. GUGGAU- . . . . . -CGGACCGCA. . AGGGUUGCGGACGACGAAA  
NC\_008146/2696715-2696767 AACAUUCGUUCCGCAUUGAG. GUGGAU- . . . . . -CGGACCGCA. . AGGGUUGCGGACGACGAAA  
NZ\_CP014196/506425-506490 ACCGUGCUUUCACAGAGAA. GUGAAAGucca. . . . . aagcgAGAGAGUUGCA. . AUGAAGAAUAAAUCUG  
NZ\_LT906473/15053-15109 GAACUAACGACGACAAAGGUC. GUUGACG. . . . . CCGAGGUUGUCG. . AAGACGACGAGGUGACA  
NC\_013441/5147932-5147989 UCGACUAUCGCGACAAAGGUC. GUCGCAU. . . . . aUCUCCGCGGCA. . AUGACGCCGCAUCCCGG  
NC\_013947/1917023-1917082 UUAACGAAAAACACAAAGGAG. GUUGCAGU. . . . . cgUGAGAAGCAGCA. . ACGGCUCUCAACAGAU  
NC\_013131/3728363-3728433 CACUAUUCGCGCAAAAGGC. GUUAUUGaccuuu. . . . . gucgggCUCUGAACGCA. . UGGAAGCGUGAUGACG  
NZ\_LT827128/2127191-2127244 AGGAAGGCUUCUACACCGAC. GUGGU- . . . . . -CGACAACGGCG. . AAGAAGCCUGGCGCCUGG  
NZ\_CP011492/3795431-3795481 UGAAGAUAUCUUCUAAAGGU. GAGGU- . . . . . -CUCCGGC. . UCGGUGCCGCGGCGAUG  
NC\_013170/1081416-1081472 CAGAGGACAGGACAAUAGC. GUCUCA. . . . . CUGCUGAUAGCA. . GUGGCGCUACUUCUUAUA  
NZ\_CP011340/8476818-8476874 AGAUAGCCGUCGCAACGAC. GUCGAUG. . . . . CUGUCCUAUCG. . CUGGCGAUUCUACGAGA  
NZ\_CP011340/55719-55775 AGAUAGCCGUCGCAACGAC. GUCGAUG. . . . . CUGUCCUAUCG. . CUGGCGAUUCUACGAGA  
NC\_013170/205749-205805 CAGAGGACAGGACAAUAGC. GUCUCA. . . . . CUGCUGAUAGCA. . GUGGCGCUUCUUCUUAUA  
NZ\_CP009914/5424084-5424140 AACUUCUACGACAGCGGU. GUCGUGC. . . . . AUGGACAGGGC. . UGGAAGCCCUUAUCACU  
NC\_022523/1727699-1727752 AUCAAUGGCUAGGCAAAUGU. GUUC-- . . . . . -GAUUGCAUGCA. . AUGAAGCAAAUCUGCG  
NZ\_CP013747/1830155-1830214 GUAAAAGUCAUAUAAAGAG. GUCUGGc. . . . . gcAGGACGUAUACA. . AAGGGUAUGAUUCAA  
NZ\_CP010407/142442-142501 AGCGACUGCUUGACAAAGAA. GUCAGCa. . . . . guCGCUUGAGUUA. . AGGGUAGGCGCAGAGAAG  
NC\_018720/1405348-1405400 GAUUGGUACGCGCUAAUGAU. GAGC-- . . . . . -ACUGAUUGCA. . AGGCUGACACGAAGGAG  
NZ\_CP017696/1186101-1186153 GAUUGGUACGCGCUAAUGAU. GAGC-- . . . . . -ACUGAUUGCA. . AGGCUGACACGAAGGAG  
NZ\_CP018151/1648105-1648165 ACAAGUGCCAGGGCUAAGGG. GCCUUGGca. . . . . cuCAAGAAGGUCA. . AUGAAGACAUAGCUGAAG  
NZ\_CP012299/661110-661170 ACAAGUGCCAGGGCUAAGGG. GCCUUGGca. . . . . cuCAAGAAGGUCA. . AUGAAGACAUAGCUGAAG  
NC\_021663/266084-266134 ACUUUCUGCACGGUACGUAU. GCCGU- . . . . . -CCUGGUCA. . AGGUAGACGUCGGUGAAG  
NC\_015125/3169487-3169543 ACGAAUACAUCGAGAAGGCA. CUCGCGG. . . . . AGCUGAAGGACG. . AAGGCUCACCGUCGACG  
NZ\_CP007456/1763522-1763578 AACCAGCUAUUACCAAGUG. GUAGUUA. . . . . GCUGACUGGGCA. . GAGAAGCCCUAUCGGAAA  
NZ\_AP017369/3179917-3179973 GUGCUGCAGAUACAAUGU. GUUGACG. . . . . CUGAAGUUUGUCG. . AAGACGACGACGUGACA  
NC\_010816/1451004-1451062 AAUGCGUAUUUCUAAUGAA. GAAGGCAu. . . . . cUGCUUACUCG. . AAGAAGAGAUUAAGGAAA  
NZ\_AP014658/198738-198796 AAUGCGUAUUUCUAAUGAA. GAAGGCAu. . . . . cUGCUUACUCG. . AAGAAGAGAUUAAGGAAA  
NZ\_CP013673/208320-208378 AAUGCGUAUUUCUAAUGAA. GAAGGCAu. . . . . cUGCUUACUCG. . AAGAAGAGAUUAAGGAAA  
NZ\_CP010453/221198-221256 AAUGCGUAUUUCUAAUGAA. GAAGGCAu. . . . . cUGCUUACUCG. . AAGAAGAGAUUAAGGAAA  
NC\_015052/201502-201560 AAUGCGUAUUUCUAAUGAA. GAAGGCAu. . . . . cUGCUUACUCG. . AAGAAGAGAUUAAGGAAA  
NZ\_LN824140/2159815-2159873 AAUGCGUAUUUCUAAUGAA. GAAGGCAu. . . . . cUGCUUACUCG. . AAGAAGAGAUUAAGGAAA  
NC\_014656/1432755-1432813 AAUGCGUAUUUCUAAUGAA. GAAGGCAu. . . . . cUGCUUACUCG. . AAGAAGAGAUUAAGGAAA  
NZ\_CP006741/282168-282226 AAUGCGUAUUUCUAAUGAA. GAAGGCAu. . . . . cUGCUUACUCG. . AAGAAGAGAUUAAGGAAA  
NC\_015067/216505-216563 AAUGCGUAUUUCUAAUGAA. GAAGGCAu. . . . . cUGCUUACUCG. . AAGAAGAGAUUAAGGAAA  
NC\_017221/2053577-2053635 AAUGCGUAUUUCUAAUGAA. GAAGGCAu. . . . . cUGCUUACUCG. . AAGAAGAGAUUAAGGAAA  
NZ\_CP011965/203778-203836 AAUGCGUAUUUCUAAUGAA. GAAGGCAu. . . . . cUGCUUACUCG. . AAGAAGAGAUUAAGGAAA



NZ\_CP011964/193570-193628 AAUGCGUAUUUUAUGAA. GAAGGCAU. . . . . CUGCUUCACUCG. . . . . AAGAAAGAUUAAGGAAA  
NZ\_CP009755/210718-210772 AUGAUCGAUUUGGCAACAUU. GCCGUC- . . . . . -ACAUUCA CGCA. . . . . AGGGA GCGAGAUACCAC  
NC\_020891/2521533-2521590 GCGCUCCUCAUUAACACGAU. GUAAUGA. . . . . uCACUGCAU CACG. . . . . AAGGA GUGGUCAAUGGAU  
  
NZ\_CP014869/2010339-2010393 CAUUAACAUCACUGGA. GAUGAC- . . . . . -GAACGAUGACA. . . . . UGGGA GUUCCGAGCCACG  
NC\_022115/137578-137631 ACGAGAACGGCGGGAGGAU. GCCGCG- . . . . . -AAUUCUUGACA. . . . . UUGAC GUCAACGUCACA  
NZ\_CP011295/137863-137916 ACGAGAACGGCGGGAGGAU. GCCGCG- . . . . . -AAUUCUUGACA. . . . . UUGAC GUCAACGUCACA  
NZ\_CP011005/507759-507816 GGAGAAGUGGUAUCAGCGAU. GAUACCU. . . . . uCUGCUUUAUGGA. . . . . AUGAC GCUUCGCGUCAAC  
NC\_017999/647226-647282 AUGAUGCGAUGCGGGAUGUG. GCGUUCG. . . . . AUGUCAAAACA. . . . . GCGAU GUUCCAACUUUU  
NC\_008538/84098-84153 AAACAUUCCCGCGUGAAGAU. ACGUCC- . . . . . CAGGAGUGAUA. . . . . AUGCG GAUCGAAGCCAAG  
NC\_015147/75561-75616 AAACAUUCCCGCGUGAAGAU. ACGUCC- . . . . . CAGGAGUGAUA. . . . . AUGCG GAUCGAAGCCAAG  
NC\_022198/34937-34993 CCGAAACCCACGACAAUGAC. GUCGUAG. . . . . GUUUGCUCAGCG. . . . . GUGUU GCUUGGGUGCUG  
NC\_012590/844165-844219 AUAAUCCCAUUGGAAAAGC. CCGUAA- . . . . . -UUGACCCGCA. . . . . ACGGAGCCUGCUCCACG  
NZ\_CP010071/1151605-1151667 UUACCGAUAGCGCCAAUGGC. GGGGUGCg. . . . . ugaGGAGAAUUGUCA. . . . . AUGAC GACAGUGCAUGAG  
NZ\_AP012325/1553467-1553523 AACCAGCUAGUUAACCAAGUG. GUAGUUA. . . . . GUUGAUUGGGCA. . . . . GAGAAGCCCUAUCGAAA  
NZ\_AP012330/1670384-1670440 AACCAGCUAGUUAACCAAGUG. GUAGUUA. . . . . GUUGAUUGGGCA. . . . . GAGAAGCCCUAUCGAAA  
NC\_015145/3706068-3706123 GCUCACACAGCCCCAAAGGU. GGGGUG- . . . . . AUCACGAA CACA. . . . . AGGGA GUGUUGUCAUGC  
NC\_013715/83238-83293 ACCACCAGAU GACAAAGAA. GUUUUG- . . . . . UGCGGAUA UUCA. . . . . AAGGAGAAAUAUGACU  
NZ\_AP012323/63901-63952 AUGGUGACCGAGGCAAGUGAA. GCCUA- . . . . . -UGGCCGGCG. . . . . AUGUG GCCGGAAUGACA  
NC\_014616/480016-480067 AUGGUGACCGAGGCAAGUGAA. GCCUA- . . . . . -UGGCCGGCG. . . . . AUGUG GCCGGAAUGACA  
NZ\_CP006713/481305-481356 AUGGUGACCGAGGCAAGUGAA. GCCUA- . . . . . -UGGCCGGCG. . . . . AUGUG GCCGGAAUGACA  
NZ\_CP010453/510303-510354 AUGGUGACCGAGGCAAGUGAA. GCCUA- . . . . . -UGGCCGGCG. . . . . AUGUG GCCGGAAUGACA  
NZ\_CP010411/1097476-1097527 AUGGUGACCGAGGCAAGUGAA. GCCUA- . . . . . -UGGCCGGCG. . . . . AUGUG GCCGGAAUGACA  
NZ\_CP010411/1998475-1998526 AUGGUGACCGAGGCAAGUGAA. GCCUA- . . . . . -UGGCCGGCG. . . . . AUGUG GCCGGAAUGACA  
NC\_022567/1426157-1426207 GUUCAUUGGUGAGAAAGUA. CUCUAG- . . . . . -AAGGGCA. . . . . ACGAGGCCAUGGCCGAGG  
NZ\_CP015407/352862-352928 AUUAUACAAAAC- CUAGGCG. GCGGACGcguu. . . . . gcgCGACGUCUAGGGCA. . . . . AUGGA GCCACUUGACAGA  
NC\_015738/898918-898968 AGCGAGACGUGAGCAAGGU. GCUGA- . . . . . -CAAAGGCA. . . . . GUGAU GCCUUCGUAGCGC  
NC\_022657/9254943-9254997 GACAUCGGUGCUGCAACGGG. GCAGCU- . . . . . -CGACGAA CGCG. . . . . AAGGA GCGGUGCAUGUAC  
NZ\_CP013129/6497896-6497952 UGGAUGUCGACGUCAAUGCC. GAUGCCG. . . . . AUGUCGCAUGUC. . . . . AUGAC GAUGACGAUGACG  
NZ\_CP010453/2252785-2252838 UAAUUAACAACAUCAGAGAG. GAUGU- . . . . . -GUCUCCAUGCA. . . . . UUGGAGCAAAGGAAAGAA  
NZ\_CP010797/4970838-4970892 AACAAUUCUACGUAAAGGU. GCGUCA- . . . . . -AAGAGAU GGUA. . . . . ACCGAGCCUGAAGUGACC  
NC\_020517/396033-396084 AUGGUGACCGAGGCAAGUGAA. GCCUA- . . . . . -UGGCCGGCG. . . . . AUGUG GCCGGAAUGACA  
NC\_017219/321389-321440 AUGGUGACCGAGGCAAGUGAA. GCCUA- . . . . . -UGGCCGGCG. . . . . AUGUG GCCGGAAUGACA  
NC\_011593/321598-321649 AUGGUGACCGAGGCAAGUGAA. GCCUA- . . . . . -UGGCCGGCG. . . . . AUGUG GCCGGAAUGACA  
NZ\_LT706985/581803-581857 UUCUAAUUCAUCAUGGAGAU. AUGACA- . . . . . -UAUUUCAACA. . . . . AUGGU GUUACAGCUAAAU  
NC\_018531/2363737-2363795 GCAUCCGGGCGUGCAAGUG. GCAGUCCg. . . . . gACUUGGGAUUA. . . . . AAGGAGAUUAUGGUGACU  
NC\_016799/2366685-2366748 ACAAAAGAAAACGCAAGUU. GCGCGAAGaa. . . . . cgCGAUUCCUA CGCA. . . . . AGGCC GCGAAAUAUUUG  
NC\_016800/2305800-2305863 ACAAAAGAAAACGCAAGUU. GCGCGAAGaa. . . . . cgCGAUUCCUA CGCA. . . . . AGGCC GCGAAAUAUUUG  
NZ\_CP015622/2138588-2138650 UUUGUAUGUUUUUCAAUGUU. GAAGUAUuag. . . . . uuaCAUCUCGUUGCA. . . . . AGGAAGCAUUCUGAAA  
NZ\_CP011489/1875760-1875820 AACAAUUGACCGCCCAUGGC. GCGCAAug. . . . . caAUGUCUUUUGCA. . . . . GUGAU GCAGGGGUCAGA  
NZ\_AP017975/1202932-1202999 AUGAUCGCAUUGAAUUGCA. UUAUGUGcauca. . . . . uggauuCAAUAGAU GGCA. . . . . ACGGAGCCGAAGACCAUC  
NZ\_AP012334/1529587-1529653 AUAAUUAUUAUAGCAGAAA. GUUAUAGcgg. . . . . ugguaAAUUAUUA CACA. . . . . AAGAGGCGUCCGCUAUG  
NC\_010168/1074795-1074848 GUAACUGUCAGUUCAAAGG. GAACA- . . . . . -GACCUUUGCA. . . . . AUGAC GCGUGGGGUGGGA  
NZ\_CP006712/578515-578576 CAUAUAGCAGCUGCAAUUGGG. GCAGCACac. . . . . .aaUGGCAAGGAUUA. . . . . AAGGAGAAUUGGGCAC  
NC\_019395/1187953-1188010 ACUUUUUAAAAUACAGCUCA. GUACUGU. . . . . .aUUGUUUACGGCA. . . . . UGGAC GCCAAUGACGAUG  
NZ\_CP013126/3485203-3485260 ACUUUUUAAAAUACAGCUCA. GUACUGU. . . . . .aUUGUUUACGGCA. . . . . UGGAC GCCAAUGACGAUG  
NZ\_CP019400/3442746-3442803 ACUUUUUAAAAUACAGCUCA. GUACUGU. . . . . .aUUGUUUACGGCA. . . . . UGGAC GCCAAUGACGAUG  
NZ\_CP007699/2624829-2624882 UCCACGACCGCGAGAUAGAU. CUCGA- . . . . . -UGAAGUGCGCG. . . . . AAGUC GCGGAAGGUGAAG  
NZ\_CP012750/3057331-3057388 AGAAAGAAUUAUGAACAGAU. GUCAGAA. . . . . cUCAUUGUCGGCG. . . . . GCGGU GCCAAAUCGCC  
NZ\_CP014145/3382517-3382572 ACGAGGAGAAUU- CAUAGAC. GAAAUC. . . . . GGCGUACAGGCC. . . . . AUGAU GCUGAAAGACAAU  
NZ\_CP012479/1014978-1015039 AAAUGGCUAGCGACAGUGAC. GUUGUAGcc. . . . . cuuUUGGAUGAAGUA. . . . . AAGUU ACUCGGUAUUCG  
NZ\_LT821227/813267-813315 AGAAUUUUUAUAAACAAAGAC. GUUUUUU. . . . . UUGA. . . . . AAAGC CAAUUGCGAUGAA  
NC\_006361/389573-389632 GUGACGGCAGACACAAAGGA. GUGUGCGa. . . . . ugCUGGUGACGUCG. . . . . AUGAAGACCCUGCGGGG  
NC\_015145/2273699-2273754 CAAGCAACUAACAACGUU. UUGCAA- . . . . . .AGGAACAGGUGCA. . . . . AUGGC GACGAAGGUAAAC  
NZ\_CP023445/3895160-3895225 GAUUCAGUGAACGCAACGUA. GCCUUUGcgau. . . . . gucagAAACACAGCGG. . . . . CAGGAGCCUGGGAAACCAUG  
NZ\_CP016773/883188-883253 AUGCAACUGAAGUC AAGGAA. GGCUUUGgagug. . . . . cgguuUCGGGUAUGGCA. . . . . AGGGUGCUUAUCUUAAG  
NC\_019958/29757-29809 UCAACGAAGAAGACAUUGAC. GUCUU- . . . . . -CUUGAA CGCA. . . . . UUGUC GCGACAAGGCAGC  
NZ\_CP018002/2035851-2035913 AACAAAGGAGAGGUC AACGAU. GACGAAGguc. . . . . aacGCUUCGAAUGCC. . . . . AUGCUGCAGGUGUCUACAG  
NZ\_CP010341/510623-510685 AACAAAGGAGAGGUC AACGAU. GACGAAGguc. . . . . aacGCUUCGAAUGCC. . . . . AUGCUGCAGGUGUCUACAG  
NC\_014215/540311-540373 AACAAAGGAGAGGUC AACGAU. GACGAAGguc. . . . . aacGCUUCGAAUGCC. . . . . AUGCUGCAGGUGUCUACAG  
NZ\_LN997841/2329779-2329841 AACAAAGGAGAGGUC AACGAU. GACGAAGguc. . . . . aacGCUUCGAAUGCC. . . . . AUGCUGCAGGUGUCUACAG  
NZ\_CP013200/1608213-1608269 UUCUAAUUGCCCAUUGCG. GUGGAAG. . . . . CGGCCCUUGCA. . . . . AGGGUGAUUAUACCCGAC  
NZ\_CP011340/7513420-7513468 CCGCAUUGCGGUGUACACGAU. GACAU- . . . . . -AGGUU- . . . . . ACGAU GACACCGCUGAAG  
NZ\_AP012325/279728-279782 UGCGAAAUCAGCACAAUGAA. GUUCUG- . . . . . -CAUAUCUGGCA. . . . . UAGGAGACGUGUCUUUCG  
NZ\_AP012332/852571-852627 UGAUGGACGUUAAGAAAGGCU. CUUACCG. . . . . .AAGCCGAAAGGCG. . . . . AUGUAGCUCGCGUAAGG  
NC\_014644/991686-991742 UGAUGGACGUUAAGAAAGGCU. CUUACCG. . . . . .AAGCCGAAAGGCG. . . . . AUGUAGCUCGCGUAAGG  
NC\_017456/909585-909641 UGAUGGACGUUAAGAAAGGCU. CUUACCG. . . . . .AAGCCGAAAGGCG. . . . . AUGUAGCUCGCGUAAGG  
NZ\_CP007519/1401552-1401608 AUGGUAGCCUCGGCAAGGAC. GCCCGUG. . . . . .AGGUAGCUGCCG. . . . . AUGGAGGCGAGAGGGUCG  
NZ\_CP007519/1203784-1203837 ACCGGUAUUUCCGCAUGAU. GCGGU- . . . . . -UACAGGGGUA. . . . . AUGCC GACAUCAAGCCG  
NC\_013714/1424860-1424909 UAGAAAUAUUUAGAACGUU. CUAAUU- . . . . . -AUGACA. . . . . AAGUGUUCGACAAAGGAA  
NZ\_AP012326/1424863-1424912 UAGAAAUAUUUAGAACGUU. CUAAUU- . . . . . -AUGACA. . . . . AAGUGUUCGACAAAGGAA  
NZ\_CP012750/1968178-1968238 ACGAAGACGACGACACUGUA. GUCGAGCg. . . . . ccCUGACCAUGGU. . . . . AAGCAGCCCUUGUCCCA

NC 011879/279898-279963 CUGAAUGCAUCGAC AACGAC. GUUG CCAgccu. . . . . gaccuGCGUCUGCGCA. . ACUCCGCCUCUGAUGAGG  
NZ CP021417/1615601-1615651 ACGAAAACCUUGAAC GAAGAG. GUUU --- . . . . . ---GUAUGGCCA. . AAGACGGCACCACCGGUG  
NC 016114/4725761-4725819 CCAUUCGUCGCAACAAUGUC. GUUGCUCg. . . . . aACUUCGAAUGCA. . ACGUAGCGUUUCUCAGAU  
NC 013739/1067888-1067939 AUCCGGGUAAGCGAU ACCGGA. AUCGC --- . . . . . ---UAGUAGGCCA. . ACGAUGCCGGAAACGGUU  
  
NZ CP011773/3780281-3780340 AAUACUUAACGAUGGCGAC. AUCGUUGa. . . . . . . ggGGACCAUCGUCA. . AGGUUGACCGUGACGAAG  
NZ CP006713/560435-560496 CAUAUAGCAGCUGCAAUGGG. GCAGCACg. . . . . . . aauGGAAAGGAUUCA. . AGGGAGAAUCAUGGGCAC  
NZ CP011402/1421754-1421804 UAGGUUUGGUGAGAAAGUA. CUUAUG- . . . . . . . ---AAGGGCA. . ACGAGGCCUUUGCCGACG  
NZ CP013859/1072639-1072688 CCCAGAUUUUCUGGUAACGAU. ACCAA- . . . . . . . ---CCGAACA. . AGGGAGUUUGAUGAUU  
NZ CP014196/523749-523796 UACGUCCGGUCGCA AUGAC. GCGA --- . . . . . . . ---AGGGUA. . AAGGAGCCCGCAUUGAAA  
NZ CP017421/3552882-3552929 UACGUCCGGUCGCA AUGAC. GCGA --- . . . . . . . ---AGGGUA. . AAGGAGCCCGCAUUGAAA  
NC 017834/1905417-1905476 GAGAAACACUUCACAGAGCA. GUGGAAGg. . . . . . . uuGUGGCCUAGUCG. . AAGACGACGGUUGCAAAC  
NZ CP015407/750467-750526 GAGAAACACUUCACAGAGCA. GUGGAAGg. . . . . . . uuGUGGCCUAGUCG. . AAGACGACGGUUGCAAAC  
NZ CP006711/775729-775796 CAAAAAGACAUUGAAACGCA. UCAAUAaauaa. . . . . . . ucaaggAUUACCAACGCA. . AUGGC GCGUCAGACGGCA  
NZ CP006715/872535-872602 CAAAAAGACAUUGAAACGCA. UCAAUAaauaa. . . . . . . ucaaggAUUACCAACGCA. . AUGGC GCGUCAGACGGCA  
NC 017218/1334083-1334150 CAAAAAGACAUUGAAACGCA. UCAAUAaauaa. . . . . . . ucaaggAUUACCAACGCA. . AUGGC GCGUCAGACGGCA  
NZ AP012324/788354-788421 CAAAAAGACAUUGAAACGCA. UCAAUAaauaa. . . . . . . ucaaggAUUACCAACGCA. . AUGGC GCGUCAGACGGCA  
NZ CP006712/816764-816831 CAAAAAGACAUUGAAACGCA. UCAAUAaauaa. . . . . . . ucaaggAUUACCAACGCA. . AUGGC GCGUCAGACGGCA  
NZ CP006714/819771-819838 CAAAAAGACAUUGAAACGCA. UCAAUAaauaa. . . . . . . ucaaggAUUACCAACGCA. . AUGGC GCGUCAGACGGCA  
NZ CP006716/860681-860748 CAAAAAGACAUUGAAACGCA. UCAAUAaauaa. . . . . . . ucaaggAUUACCAACGCA. . AUGGC GCGUCAGACGGCA  
NC 020517/907358-907425 CAAAAAGACAUUGAAACGCA. UCAAUAaauaa. . . . . . . ucaaggAUUACCAACGCA. . AUGGC GCGUCAGACGGCA  
NZ CP010433/1704565-1704615 UCCGAUUGCAUGCAAUGAA. GCAAA- . . . . . . . ---CAUCUGCG. . AUGAAGCAGUGGAAGAAG  
NZ CP017098/1704773-1704823 UCCGAUUGCAUGCAAUGAA. GCAAA- . . . . . . . ---CAUCUGCG. . AUGAAGCAGUGGAAGAAG  
NZ CP007755/1693904-1693954 UCCGAUUGCAUGCAAUGAA. GCAAA- . . . . . . . ---CAUCUGCG. . AUGAAGCAGUGGAAGAAG  
NC 011835/830043-830093 UCCGAUUGCAUGCAAUGAA. GCAAA- . . . . . . . ---CAUCUGCG. . AUGAAGCAGUGGAAGAAG  
NC 017866/1699110-1699160 UCCGAUUGCAUGCAAUGAA. GCAAA- . . . . . . . ---CAUCUGCG. . AUGAAGCAGUGGAAGAAG  
NC 017214/396411-396461 UCCGAUUGCAUGCAAUGAA. GCAAA- . . . . . . . ---CAUCUGCG. . AUGAAGCAGUGGAAGAAG  
NC 017867/1699329-1699379 UCCGAUUGCAUGCAAUGAA. GCAAA- . . . . . . . ---CAUCUGCG. . AUGAAGCAGUGGAAGAAG  
NC 012814/1699274-1699324 UCCGAUUGCAUGCAAUGAA. GCAAA- . . . . . . . ---CAUCUGCG. . AUGAAGCAGUGGAAGAAG  
NC 021593/1698898-1698948 UCCGAUUGCAUGCAAUGAA. GCAAA- . . . . . . . ---CAUCUGCG. . AUGAAGCAGUGGAAGAAG  
NC 017216/1698919-1698969 UCCGAUUGCAUGCAAUGAA. GCAAA- . . . . . . . ---CAUCUGCG. . AUGAAGCAGUGGAAGAAG  
NC 017215/1703861-1703911 UCCGAUUGCAUGCAAUGAA. GCAAA- . . . . . . . ---CAUCUGCG. . AUGAAGCAGUGGAAGAAG  
NC 012815/1698991-1699041 UCCGAUUGCAUGCAAUGAA. GCAAA- . . . . . . . ---CAUCUGCG. . AUGAAGCAGUGGAAGAAG  
NZ CP007522/1698736-1698786 UCCGAUUGCAUGCAAUGAA. GCAAA- . . . . . . . ---CAUCUGCG. . AUGAAGCAGUGGAAGAAG  
NZ CP009045/1698908-1698958 UCCGAUUGCAUGCAAUGAA. GCAAA- . . . . . . . ---CAUCUGCG. . AUGAAGCAGUGGAAGAAG  
NC 017217/1704560-1704610 UCCGAUUGCAUGCAAUGAA. GCAAA- . . . . . . . ---CAUCUGCG. . AUGAAGCAGUGGAAGAAG  
NZ CP011043/2403940-2403997 GCGCUCGCAUUAACACGAU. GUAAUGA. . . . . . . uCACUGCAUCACG. . AAGGAGUGGUCAAUGGAU  
NC 018531/648604-648665 GUUCUUCGAGACCC AACGGU. GGGUCACcc. . . . . . . guuCACCAGGAGGCCA. . AUGUGGCCCUCAAUCUCA  
NZ CP007456/560537-560584 AACAUUUUGCUGCANN- . . . . . . . GCAGCG- . . . . . . . ---CUACGCA. . AUGAAGCGCCCAAUCGAA  
NC 009338/4909724-4909773 UAACAUUCGACGACAAUGGG. GUCGA- . . . . . . . ---CGUGGA. . AUCGUGCCGUCCCCGAGU  
NZ CP012069/2778345-2778401 UUAAGUAUAACGUCAAUGGU. GACAUUG. . . . . . . CUGAAUAUGUCG. . AUGCGGAUGGCAUUGAGG  
NC 008711/678551-678612 GUUCUUCGAGACCC AACGGU. GGGUCACcc. . . . . . . guuCACCAGGAGGCCA. . AUGUGGCCCUCAAUCUCA  
NZ CP010437/431761-431813 AUUAUUUUUAUCAAACAAAA. GUUG- . . . . . . . -AGACGGUGACA. . ACGACGUUCUACCAAGAA  
NZ AP012325/392162-392214 AUUAUUUUUAUCAAACAAAA. GUUG- . . . . . . . -AGACGGUGACA. . ACGACGUUCUACCAAGAA  
NZ CP014313/1226163-1226223 CAGUCGCGGGUGGCAACGAC. GCCACUGac. . . . . . . cuCGGGAGUCUCA. . AUGACGAGUGAAAAGACC  
NZ CP007456/2261564-2261614 UACCGAUGGUUCCAAUGGU. GGAAC- . . . . . . . ---UCCAUACA. . GCGAAGUAAGGAGAAAUA  
NZ CP013142/3516640-3516700 AGGAUGUGACCGACAAUGAC. GUCGCAUcc. . . . . . . aaGGUUCAGGUCA. . GGGCCGACAGUACGCAGC  
NZ CP016770/10956-11027 AACAAAUCUUAAC AAGGCU. GUUGUCCacggcaa. . . . . . . agugauuuUGUCCUCAGGUA. . AAGAGCGUAUUAUCUACG  
NZ CP016772/10974-11045 AACAAAUCUUAAC AAGGCU. GUUGUCCacggcaa. . . . . . . agugauuuUGUCCUCAGGUA. . AAGAGCGUAUUAUCUACG  
NC 003450/2984562-2984618 GCGCUCGAGAUGACAAUGUU. GUUGACG. . . . . . . CUGAAGUUUGUC. . AAGACGACGCAGCUGACA  
NC 006958/2957867-2957923 GCGCUCGAGAUGACAAUGUU. GUUGACG. . . . . . . CUGAAGUUUGUC. . AAGACGACGCAGCUGACA  
NC 020519/2984561-2984617 GCGCUCGAGAUGACAAUGUU. GUUGACG. . . . . . . CUGAAGUUUGUC. . AAGACGACGCAGCUGACA  
NC 022040/2754414-2754470 GCGCUCGAGAUGACAAUGUU. GUUGACG. . . . . . . CUGAAGUUUGUC. . AAGACGACGCAGCUGACA  
NC 009342/2977062-2977118 GCGCUCGAGAUGACAAUGUU. GUUGACG. . . . . . . CUGAAGUUUGUC. . AAGACGACGCAGCUGACA  
NC 021351/3001096-3001152 GCGCUCGAGAUGACAAUGUU. GUUGACG. . . . . . . CUGAAGUUUGUC. . AAGACGACGCAGCUGACA  
NC 021352/3001095-3001151 GCGCUCGAGAUGACAAUGUU. GUUGACG. . . . . . . CUGAAGUUUGUC. . AAGACGACGCAGCUGACA  
NZ CP020658/3060506-3060562 GCGCUCGAGAUGACAAUGUU. GUUGACG. . . . . . . CUGAAGUUUGUC. . AAGACGACGCAGCUGACA  
NZ CP013991/2931024-2931080 GCGCUCGAGAUGACAAUGUU. GUUGACG. . . . . . . CUGAAGUUUGUC. . AAGACGACGCAGCUGACA  
NZ CP016954/1895894-1895946 AACAUUGAUGAUGU GAGGAU. GUAU- . . . . . . . -GACUACCGCA. . AUGAAGCCACGGGGCUAA  
NZ CP010437/550779-550840 GCCAUCAUUUUGUC GAUGAU. GACUUGGuc. . . . . . . aauAAGGAGAAGACA. . AUGAAGUUCAAACCAAU  
NZ CP018134/2473648-2473705 AUGAUUCGAGCCGCA AUGAG. GCGAUCG. . . . . . . gAGGACCCAGGUG. . AUGGACCCGGUUGGAAC  
NZ CP011530/4394597-4394659 UUGAACUUGCGCGAACCGGC. GUGCCACgc. . . . . . . agaACGAUUCGCCA. . UUGGC GCGUAGACCAUG  
NC 008726/3573511-3573570 AAUACUUAACGAUGGCGAC. AUCGUUGa. . . . . . . ggGAACCAUCGUCA. . AGGUUGACCGACGAAG  
NC 014643/1473946-1474000 AAAGGAAAAACUGCUAUGCC. GCAGAU. . . . . . . -UCUUGAUGGUA. . AGGCAACCGACGCCGCCA  
NZ CP019304/4972392-4972446 GCUCACGUAAACCC AAGGGU. GGGUG- . . . . . . . -UCACGAAACA. . AGGGAGUGUUUGUUAUGA  
NZ CP018135/1469870-1469937 AUACAGAUUC CAGCAACGAU. GCUGAGAugaca. . . . . . . ggcgccACGGCGGAAG. . AAGGAUUCGCAAAGAAC  
NZ CP014145/2717332-2717386 UGCGGGAUCAACCG GAAGAC. GCGGGU- . . . . . . . -GAGAAUACG. . AAGGUUGAGGAAAUAUG  
NZ CP019304/1250002-1250061 ACGGCUUCGAUGAC GAUGAA. GUCGCAAu. . . . . . . caCGGUCAACGGCA. . AGGAGGCCCGGUACGACC  
NC 013159/3078960-3079028 ACCCUGAGGUUCAC AACGAC. GUGGAUUcgggu. . . . . . . ucuugaUCGUUCCGGCA. . AGGAAGUCUUCACGGGG  
NZ CP007791/8740-8792 CCACUGUUUAUCUC AAGGAG. GAGA- . . . . . . . -CGUGAAGGGC. . AUGAAGCUCAUGACCAUC  
NZ CP012750/1820450-1820512 CAAAUUCAAU CACC AAGGAU. GGUGUUGuc. . . . . . . ggCUUUUGAUCGUCG. . AGGACGACAGGCAGUUG  
NC 016802/2293876-2293939 ACAAAGAAAACCGCA AAGUU. GCGCGAAGaa. . . . . . . cacgAUUACUGCGCA. . AGGCCGCGAAAUAUUUG



NC\_016787/2287584-2287647 ACAAAGAAAA CGCAAGUU. GCGCGAAGaa. . . . . cacgAUUCCUG CGCA. . AGGCC GCGAAAUUUUUG  
NC\_016788/2311402-2311465 ACAAAGAAAA CGCAAGUU. GCGCGAAGaa. . . . . cacgAUUCCUG CGCA. . AGGCC GCGAAAUUUUUG  
NC\_016790/2208578-2208641 ACAAAGAAAA CGCAAGUU. GCGCGAAGaa. . . . . cacgAUUCCUG CGCA. . AGGCC GCGAAAUUUUUG  
NZ\_CP017150/2225991-2226056 AAACUUAUC CGCACGAUGUC. GUCGAAAGcagc. . . . . cgcgAUUCCUGUCA. . UCGGC GACUAAACCAUC  
NC\_019966/2977710-2977769 AAUACUUAAC CGAUUGCGAC. AUCGUCGa. . . . . ggGAACAUCUCA. . AGGUUGACCGUGACGAGG  
  
NC\_013714/166080-166138 AGUCACUUGA UGGAACCGGU. UCCAUCAa. . . . . aCGUGAGAAAACA. . UCGAGGUUUUCUCACAAG  
NZ\_AP012326/166081-166139 AGUCACUUGA UGGAACCGGU. UCCAUCAa. . . . . aCGUGAGAAAACA. . UCGAGGUUUUCUCACAAG  
NZ\_CP017150/1661329-1661374 AUGGGAAAUU UCCAAAGGU. GGAGAU- . . . . . GCA. . AUGGAGC -UCUCAAAACG  
NZ\_CP012072/276999-277055 UCAAAGUGUG UCACAAUCGU. GUGAACCC. . . . . UAAUCAUGCUCA. . AUGAGGAGUGAUUCUAGC  
NZ\_CP014952/3097993-3098053 AUGUUAUGGC GCGAACGCC. GCGAUUUgc. . . . . guAAGUCAGCGCA. . AAGAAGCGUAACCCCGA  
NZ\_CP014145/15801-15867 GCGAUGGCCG GCGAGCGAU. GCUGACUcgcg. . . . . aagggAUUAAACGACA. . UUGUUUCUCUCAAUAG  
NZ\_CP010433/1662665-1662716 GAGUAAUCUG CGACGACGAU. GUCGC- . . . . . -GGACC CGCA. . ACGAAGCGAGGUGCUGUC  
NZ\_CP017098/1662873-1662924 GAGUAAUCUG CGACGACGAU. GUCGC- . . . . . -GGACC CGCA. . ACGAAGCGAGGUGCUGUC  
NZ\_CP007755/1652004-1652055 GAGUAAUCUG CGACGACGAU. GUCGC- . . . . . -GGACC CGCA. . ACGAAGCGAGGUGCUGUC  
NZ\_CP015407/1036608-1036659 GAGUAAUCUG CGACGACGAU. GUCGC- . . . . . -GGACC CGCA. . ACGAAGCGAGGUGCUGUC  
NC\_011835/788300-788351 GAGUAAUCUG CGACGACGAU. GUCGC- . . . . . -GGACC CGCA. . ACGAAGCGAGGUGCUGUC  
NC\_022523/1678573-1678624 GAGUAAUCUG CGACGACGAU. GUCGC- . . . . . -GGACC CGCA. . ACGAAGCGAGGUGCUGUC  
NC\_017866/1657210-1657261 GAGUAAUCUG CGACGACGAU. GUCGC- . . . . . -GGACC CGCA. . ACGAAGCGAGGUGCUGUC  
NC\_017214/354579-354630 GAGUAAUCUG CGACGACGAU. GUCGC- . . . . . -GGACC CGCA. . ACGAAGCGAGGUGCUGUC  
NC\_017867/1657429-1657480 GAGUAAUCUG CGACGACGAU. GUCGC- . . . . . -GGACC CGCA. . ACGAAGCGAGGUGCUGUC  
NC\_012814/1657373-1657424 GAGUAAUCUG CGACGACGAU. GUCGC- . . . . . -GGACC CGCA. . ACGAAGCGAGGUGCUGUC  
NC\_021593/1656999-1657050 GAGUAAUCUG CGACGACGAU. GUCGC- . . . . . -GGACC CGCA. . ACGAAGCGAGGUGCUGUC  
NC\_017216/1657019-1657070 GAGUAAUCUG CGACGACGAU. GUCGC- . . . . . -GGACC CGCA. . ACGAAGCGAGGUGCUGUC  
NC\_017215/1661994-1662045 GAGUAAUCUG CGACGACGAU. GUCGC- . . . . . -GGACC CGCA. . ACGAAGCGAGGUGCUGUC  
NC\_012815/1657091-1657142 GAGUAAUCUG CGACGACGAU. GUCGC- . . . . . -GGACC CGCA. . ACGAAGCGAGGUGCUGUC  
NZ\_CP007522/1656836-1656887 GAGUAAUCUG CGACGACGAU. GUCGC- . . . . . -GGACC CGCA. . ACGAAGCGAGGUGCUGUC  
NZ\_CP009045/1657008-1657059 GAGUAAUCUG CGACGACGAU. GUCGC- . . . . . -GGACC CGCA. . ACGAAGCGAGGUGCUGUC  
NC\_017217/1662660-1662711 GAGUAAUCUG CGACGACGAU. GUCGC- . . . . . -GGACC CGCA. . ACGAAGCGAGGUGCUGUC  
NZ\_CP024160/1874478-1874528 AAAAAGGGG UCGCAAAGAU. GCGGCG- . . . . . -CCGUUA. . AAGGC AACCAAGGCAACG  
NZ\_CP007724/1164052-1164109 UUUUAUUC UAGCAAGGGU. GUUGCAU. . . . . gAUGCAAUAAACA. . UGGUAGUUUGUUAUA  
NZ\_CP007722/1194869-1194926 UUUUAUUC UAGCAAGGGU. GUUGCAU. . . . . gAUGCAAUAAACA. . UGGUAGUUUGUUAUA  
NC\_016799/608792-608851 AAUGCGGUGU CGCCAAAGCU. GGUGAAAag. . . . . cuCGAUUUUGGCA. . GUGGU GCCUUUUCUGUU  
NC\_016801/564481-564540 AAUGCGGUGU CGCCAAAGCU. GGUGAAAag. . . . . cuCGAUUUUGGCA. . GUGGU GCCUUUUCUGUU  
NC\_016785/554666-554725 AAUGCGGUGU CGCCAAAGCU. GGUGAAAag. . . . . cuCGAUUUUGGCA. . GUGGU GCCUUUUCUGUU  
NZ\_LN831026/528602-528661 AAUGCGGUGU CGCCAAAGCU. GGUGAAAag. . . . . cuCGAUUUUGGCA. . GUGGU GCCUUUUCUGUU  
NC\_016787/542020-542079 AAUGCGGUGU CGCCAAAGCU. GGUGAAAag. . . . . cuCGAUUUUGGCA. . GUGGU GCCUUUUCUGUU  
NC\_016788/530537-530596 AAUGCGGUGU CGCCAAAGCU. GGUGAAAag. . . . . cuCGAUUUUGGCA. . GUGGU GCCUUUUCUGUU  
NC\_002935/582246-582305 AAUGCGGUGU CGCCAAAGCU. GGUGAAAag. . . . . cuCGAUUUUGGCA. . GUGGU GCCUUUUCUGUU  
NC\_016789/609691-609750 AAUGCGGUGU CGCCAAAGCU. GGUGAAAag. . . . . cuCGAUUUUGGCA. . GUGGU GCCUUUUCUGUU  
NZ\_CP020410/2449468-2449527 AAUGCGGUGU CGCCAAAGCU. GGUGAAAag. . . . . cuCGAUUUUGGCA. . GUGGU GCCUUUUCUGUU  
NC\_016790/519377-519436 AAUGCGGUGU CGCCAAAGCU. GGUGAAAag. . . . . cuCGAUUUUGGCA. . GUGGU GCCUUUUCUGUU  
NC\_014218/88902-88960 UGGA AAAUACAGACAGCGUA. GUCUCUAu. . . . . gUGGAACUAUCA. . AAGGGGAUUGA AAAUA  
NC\_014218/704515-704578 UUCAAAACCGUAUUC AAAGGA. GAAU AUUgug. . . . . aaacUCAAGAAAAGCA. . UUGGU GAUUAUUGCCA  
NZ\_CP006715/602495-602556 CAUAUAGCAG CUGCAAUGGG. GCAGCACac. . . . . aaUGCAAGGAUUA. . AGGGAGAAUCAUGGGCAC  
NC\_017218/1591103-1591164 CAUAUAGCAG CUGCAAUGGG. GCAGCACac. . . . . aaUGCAAGGAUUA. . AGGGAGAAUCAUGGGCAC  
NZ\_AP012324/548829-548890 CAUAUAGCAG CUGCAAUGGG. GCAGCACac. . . . . aaUGCAAGGAUUA. . AGGGAGAAUCAUGGGCAC  
NZ\_CP006714/580132-580193 CAUAUAGCAG CUGCAAUGGG. GCAGCACac. . . . . aaUGCAAGGAUUA. . AGGGAGAAUCAUGGGCAC  
NZ\_CP006716/624023-624084 CAUAUAGCAG CUGCAAUGGG. GCAGCACac. . . . . aaUGCAAGGAUUA. . AGGGAGAAUCAUGGGCAC  
NZ\_CP010413/1598844-1598905 CAUAUAGCAG CUGCAAUGGG. GCAGCACac. . . . . aaUGCAAGGAUUA. . AGGGAGAAUCAUGGGCAC  
NZ\_CP019596/611153-611214 CAUAUAGCAG CUGCAAUGGG. GCAGCACac. . . . . aaUGCAAGGAUUA. . AGGGAGAAUCAUGGGCAC  
NC\_020517/673821-673882 CAUAUAGCAG CUGCAAUGGG. GCAGCACac. . . . . aaUGCAAGGAUUA. . AGGGAGAAUCAUGGGCAC  
NZ\_CP017812/254992-255054 AUUUCGUCAG CGCCAAAGUU. GGUGAUCcu. . . . . uggGUCAUGAUGGUC. . AUGAG ACCCACAGCCAAA  
NC\_011886/404622-404675 ACAUUGUUUUAUUAACGUU. GUAAA- . . . . . -UCCAGAGAAGC. . AGGAU GUUUUUCUGGGCA  
NC\_008726/380445-380510 UGAUCCACGU CACC AAUGAU. GGUGCCGguua. . . . . guaaaCCGUCAGC CGCA. . UCGAC GCGUCCGGGAGG  
NZ\_AP012332/310381-310435 UACAUAUUUGAAUAAUGAA. UCUUAU- . . . . . -AAAAGCAUGCA. . AAGGAGCAUCAUGUGUGA  
NC\_014644/449487-449541 UACAUAUUUGAAUAAUGAA. UCUUAU- . . . . . -AAAAGCAUGCA. . AAGGAGCAUCAUGUGUGA  
NC\_017456/1437213-1437267 UACAUAUUUGAAUAAUGAA. UCUUAU- . . . . . -AAAAGCAUGCA. . AAGGAGCAUCAUGUGUGA  
NZ\_CP005286/2213539-2213593 UUAUAGACAAGCUCUGUGUA. GAGUUA- . . . . . -CAUCUCUGCA. . ACGGAGCAAGCCGCAAGG  
NC\_008711/2184804-2184862 GCAUCCGGGG CUGCAAAGUG. GCAGUCcg. . . . . gACUUGGGAUCA. . AGGGAGAUUAUGGUGACU  
NC\_015145/618819-618869 AUCAGCGGAA CGCCAAUGUU. CCGCA- . . . . . -UGGUGAUGGCN. . N- -NCCGAUGACCACA  
NZ\_CP014196/549436-549492 UGAACUUCGC CCGCAAGGUU. GCGGACC. . . . . AGGUGUGUUA. . UGGAGAAAGGAGAAGUUG  
NZ\_CP017421/3527274-3527330 ACCGGUAUUU CCGCAUGAU. GCGGU- . . . . . -UACAGGAGUCA. . AUGCCGACGUCGAGGCCG  
NZ\_CP012649/1076589-1076642 ACCGGUAUUU CCGCAUGAU. GCGGU- . . . . . -UACAGGAGUCA. . AUGCCGACGUCGAGGCCG  
NZ\_CP007003/426192-426245 CUCGACAUGGC CCGGAAGAA. GCGGCUG. . . . . aCGAACAGUUA. . AAGCCGAAUACGCCAAGG  
NZ\_CP019606/2506764-2506818 ACUCUGAUAAUGACAGCGGU. GUGAUU- . . . . . -UGGACGUGCA. . UGGGCUCUUGUCUGAGG  
NC\_015145/3203787-3203847 ACUGAUCCGGUCCGAUUGAC. CCGAUUGGca. . . . . ucAAGGAGUCGGCA. . AUGACGUCACAGGAAAAG  
NZ\_CP023778/7074978-7075034 AGGAACCAA CCGCAACGUU. GCGGUGG. . . . . UCGGCUGGUA. . UAGUGGAUCCAUGCCCGA  
NZ\_AP012323/1140470-1140529 AAUUCUUGG GCUCUUCGAC. GAGUUCGg. . . . . caAAGCCUACCGCG. . ACGAUCGCGCAAAAACG  
NC\_017999/1082856-1082915 AAUUCUUGG GCUCUUCGAC. GAGUUCGg. . . . . caAAGCCUACCGCG. . ACGAUCGCGCAAAAACG  
NC\_014638/1134880-1134939 AAUUCUUGG GCUCUUCGAC. GAGUUCGg. . . . . caAAGCCUACCGCG. . ACGAUCGCGCAAAAACG

NC\_014616/1104648-1104707 AAUCCAUGGGCUC AUCGAC. GAGUUCGg. . . . . caAAGCCUAC CGG. . ACGAU GCGGCAAAAAACG  
NZ\_CP010412/1159989-1160048 AAUCCAUGGGCUC AUCGAC. GAGUUCGg. . . . . caAAGCCUAC CGG. . ACGAU GCGGCAAAAAACG  
NZ\_LT821227/201305-201358 AAGAAUUUAUGAU AAUGUU. AUGCG- . . . . . -CGAAGUGAGCA. . AAGCCGCUCCACCUUGGU  
NZ\_CP012750/2510824-2510880 UCCAAGUCAACACCGAUGAC. GGUGUCG. . . . . AUCUUGCCGGCA. . UCGGC GUCGGCAGCAUC  
NC\_012704/1893895-1893951 ACGUUCACAACACCAUGGU. GGUGUAA. . . . . CACCAUUUAUC. . AGGGGGCUCUGAUGAAU  
NC\_016604/4624964-4625023 AAUACUUAACCGAUGGCGAC. AUCGUCGa. . . . . agGGACCAUCGUA. . AGGUUGACCGUGACGAAAG  
  
NZ\_CP014196/2015589-2015651 AUCAUGAAACAGCAAAGAC. GCUGACAgga. . . . . guaACACUCGUGGCA. . GCGGU GUCGCUUGCGCUC  
NZ\_CP011005/2933728-2933785 CUACCGUUAUAACAAAGGA. GUUAUU. . . . . uCACUAUGAAACG. . ACGUAGUUUCUUCUCUAC  
NC\_016604/761068-761121 AGUCGUCUGG CUCUACCGUC. GAGGU- . . . . . -GUUGUCGAGCG. . ACGGU GUCGCAUCGAAA  
NZ\_CP013290/2789043-2789103 UGUUUGAUUCGUGCAAUGAG. GCGCGCGcg. . . . . cgCCAUGGUCUGCA. . AGGAGCGAUGCAAUGAAG  
NC\_021279/64917-64969 CAACGAGCAAACGACCGCA. GCUG- . . . . . -CGAUGCUGCCA. . ACGAAGGCUUUACCGAUG  
NZ\_CP007519/1802264-1802328 CUAACCCGGCGUCGAAGGA. GACGGCGcgac. . . . . gaaGGAAUAGAAGCA. . AUGGAGCUUAAAAAUU  
NZ\_CP007156/1654540-1654593 UGGAUUCGUGGGCAAUGAU. GCCGA- . . . . . -UGGCACGGUCA. . UCGACGACAUCAUCGUGA  
NZ\_AP012323/686128-686184 AUGAUGCGAUGCGCGAUGUG. GCGUUCG. . . . . AUGUCAAACA. . GCGAU GUUCCAACGUUUU  
NC\_014638/681907-681963 AUGAUGCGAUGCGCGAUGUG. GCGUUCG. . . . . AUGUCAAACA. . GCGAU GUUCCAACGUUUU  
NC\_020506/97647-97710 UUAUAUCACUGUGCAUUGAG. GCCAAAUu. . . . . accuAAAACAGAGCA. . AUGGAGCUAAAGGCUAAA  
NZ\_CP018151/3238196-3238250 ACCACCGGCAUCUACACGAG. GAGAAG- . . . . . -AAUUGC CGG. . AAGAAGCGCAUUCGCAUC  
NZ\_CP012299/2218058-2218112 ACCACCGGCAUCUACACGAG. GAGAAG- . . . . . -AAUUGC CGG. . AAGAAGCGCAUUCGCAUC  
NC\_013714/672199-672249 UACUAGACCA AUGAAAGAA. CAUGUG- . . . . . -GUUCUCA. . AGGAAGAGAAAUCGCAAG  
NZ\_AP012326/672200-672250 UACUAGACCA AUGAAAGAA. CAUGUG- . . . . . -GUUCUCA. . AGGAAGAGAAAUCGCAAG  
NZ\_AP012327/2142256-2142313 AGCAAGUAAGCUAUACCGAU. UUGCGU. . . . . aGAGUGACAAGCA. . AAGUGGCUAUCAAUGACA  
NZ\_CP012573/2513384-2513441 UGCGCUCGCAUUAACAGAU. GUUAUGA. . . . . uAUCGCAUCAGC. . AAGAAGUGGCAUUGGAA  
NZ\_CP016773/315907-315957 AUCGCUUCAGGAAGAACGGU. CUUUA- . . . . . -CAUUGGCU. . UUGGU GCGCAGGAAUA  
NZ\_CP011545/2111716-2111774 AAAACAGCUGUU-CAAAGCC. GAAUUGUu. . . . . gcUGGUAGAAAGGCA. . GCGGU GCCAGCCACAUUU  
NZ\_CP009244/2331593-2331655 UCGCAUUGGGCCACACAAAU. GUGGAAGcg. . . . . cagAAGAAUUGGCA. . UUGGC GCCGAGACCGUCA  
NZ\_CP019705/2418176-2418238 UCGCAUUGGGCCACACAAAU. GUGGAAGcg. . . . . cagAAGAAUUGGCA. . UUGGC GCCGAGACCGUCA  
NZ\_CP011341/2510931-2510983 GCAGUGCGGAACGCAACGGC. GCGU- . . . . . -GCGAACAGCA. . AGGAAGUCGAUCCUCCAG  
NC\_017219/2786609-2786662 UAUCUUUAUCUAAAGCGAU. UUGAGU- . . . . . -UCCGACC GGCA. . AUGGU GCCAAAGAUGGUC  
NC\_011593/2790608-2790661 UAUCUUUAUCUAAAGCGAU. UUGAGU- . . . . . -UCCGACC GGCA. . AUGGU GCCAAAGAUGGUC  
NZ\_CP010411/686899-686952 UAUCUUUAUCUAAAGCGAU. UUGAGU- . . . . . -UCCGACC GGCA. . AUGGU GCCAAAGAUGGUC  
NZ\_AP012330/210641-210700 ACAUUGAUUUUUAACACGGAU. GUAAUUUc. . . . . uuGUUAUGUJACA. . ACGUU GUAAAGAAAAGUC  
NZ\_CP010849/2043899-2043964 AAGAAUUCAGCAACAAUGGC. GUUGUGAaaaacgu. . . . . cggcgaggcucGGGA. . GACC-CCCUGGGGGGCC  
NZ\_CP013747/4278609-4278677 CGCACCUUGAAUCCAAUGGC. GGAUUCGucgacc. . . . . ucguggACGUAGAGGGCA. . AAGCC GCCGUCUACUGCAU  
NZ\_CP024160/245260-245313 CCCAGGCACUCGGCAACGAU. GCCGU- . . . . . -CGAAUACGUA. . UGGACGACGUCGCUUUG  
NZ\_CP012649/1566665-1566719 GGCGAAAUCCGUACACGUA. GUAGCG- . . . . . -CGAGACUJACA. . AGGGAGUAGUCAUGGGAA  
NZ\_CP007519/659451-659505 GGCGAAAUCCGUACACGUA. GUAGCG- . . . . . -CGAGACUJACA. . AGGGAGUAGUCAUGGGAA  
NZ\_CP007003/956842-956896 GGCGAAAUCCGUACACGUA. GUAGCG- . . . . . -CGAGACUJACA. . AGGGAGUAGUCAUGGGAA  
NC\_015758/183316-183369 AUCGUCACCGACCGAAUGCU. CGGCA- . . . . . -UGUUCAGGCC. . AAGAAGCCCGCGUGCCA  
NC\_008769/214866-214919 AUCGUCACCGACCGAAUGCU. CGGCA- . . . . . -UGUUCAGGCC. . AAGAAGCCCGCGUGCCA  
NZ\_CP003494/4234506-4234559 AUCGUCACCGACCGAAUGCU. CGGCA- . . . . . -UGUUCAGGCC. . AAGAAGCCCGCGUGCCA  
NC\_020245/185199-185252 AUCGUCACCGACCGAAUGCU. CGGCA- . . . . . -UGUUCAGGCC. . AAGAAGCCCGCGUGCCA  
NC\_016804/185199-185252 AUCGUCACCGACCGAAUGCU. CGGCA- . . . . . -UGUUCAGGCC. . AAGAAGCCCGCGUGCCA  
NZ\_AM412059/185193-185246 AUCGUCACCGACCGAAUGCU. CGGCA- . . . . . -UGUUCAGGCC. . AAGAAGCCCGCGUGCCA  
NC\_012207/185199-185252 AUCGUCACCGACCGAAUGCU. CGGCA- . . . . . -UGUUCAGGCC. . AAGAAGCCCGCGUGCCA  
NZ\_CP014566/185199-185252 AUCGUCACCGACCGAAUGCU. CGGCA- . . . . . -UGUUCAGGCC. . AAGAAGCCCGCGUGCCA  
NZ\_CP008744/185198-185251 AUCGUCACCGACCGAAUGCU. CGGCA- . . . . . -UGUUCAGGCC. . AAGAAGCCCGCGUGCCA  
NZ\_CP009243/185196-185249 AUCGUCACCGACCGAAUGCU. CGGCA- . . . . . -UGUUCAGGCC. . AAGAAGCCCGCGUGCCA  
NZ\_CP012095/185167-185220 AUCGUCACCGACCGAAUGCU. CGGCA- . . . . . -UGUUCAGGCC. . AAGAAGCCCGCGUGCCA  
NZ\_CP009449/184747-184800 AUCGUCACCGACCGAAUGCU. CGGCA- . . . . . -UGUUCAGGCC. . AAGAAGCCCGCGUGCCA  
NZ\_CP013741/185196-185249 AUCGUCACCGACCGAAUGCU. CGGCA- . . . . . -UGUUCAGGCC. . AAGAAGCCCGCGUGCCA  
NZ\_CP015773/3435305-3435358 AUCGUCACCGACCGAAUGCU. CGGCA- . . . . . -UGUUCAGGCC. . AAGAAGCCCGCGUGCCA  
NC\_015848/191637-191690 AUCGUCACCGACCGAAUGCU. CGGCA- . . . . . -UGUUCAGGCC. . AAGAAGCCCGCGUGCCA  
NZ\_HG813240/183230-183283 AUCGUCACCGACCGAAUGCU. CGGCA- . . . . . -UGUUCAGGCC. . AAGAAGCCCGCGUGCCA  
NC\_020089/185188-185241 AUCGUCACCGACCGAAUGCU. CGGCA- . . . . . -UGUUCAGGCC. . AAGAAGCCCGCGUGCCA  
NZ\_CP002883/183287-183340 AUCGUCACCGACCGAAUGCU. CGGCA- . . . . . -UGUUCAGGCC. . AAGAAGCCCGCGUGCCA  
NZ\_CP002882/183286-183339 AUCGUCACCGACCGAAUGCU. CGGCA- . . . . . -UGUUCAGGCC. . AAGAAGCCCGCGUGCCA  
NC\_021251/183231-183284 AUCGUCACCGACCGAAUGCU. CGGCA- . . . . . -UGUUCAGGCC. . AAGAAGCCCGCGUGCCA  
NC\_017522/183230-183283 AUCGUCACCGACCGAAUGCU. CGGCA- . . . . . -UGUUCAGGCC. . AAGAAGCCCGCGUGCCA  
NZ\_CP002885/183230-183283 AUCGUCACCGACCGAAUGCU. CGGCA- . . . . . -UGUUCAGGCC. . AAGAAGCCCGCGUGCCA  
NC\_002755/185137-185190 AUCGUCACCGACCGAAUGCU. CGGCA- . . . . . -UGUUCAGGCC. . AAGAAGCCCGCGUGCCA  
NC\_017524/184725-184778 AUCGUCACCGACCGAAUGCU. CGGCA- . . . . . -UGUUCAGGCC. . AAGAAGCCCGCGUGCCA  
NC\_021740/184973-185026 AUCGUCACCGACCGAAUGCU. CGGCA- . . . . . -UGUUCAGGCC. . AAGAAGCCCGCGUGCCA  
NC\_009565/185285-185338 AUCGUCACCGACCGAAUGCU. CGGCA- . . . . . -UGUUCAGGCC. . AAGAAGCCCGCGUGCCA  
NC\_009525/186329-186382 AUCGUCACCGACCGAAUGCU. CGGCA- . . . . . -UGUUCAGGCC. . AAGAAGCCCGCGUGCCA  
NZ\_CP009480/184815-184868 AUCGUCACCGACCGAAUGCU. CGGCA- . . . . . -UGUUCAGGCC. . AAGAAGCCCGCGUGCCA  
NC\_018143/184967-185020 AUCGUCACCGACCGAAUGCU. CGGCA- . . . . . -UGUUCAGGCC. . AAGAAGCCCGCGUGCCA  
NC\_000962/184969-185022 AUCGUCACCGACCGAAUGCU. CGGCA- . . . . . -UGUUCAGGCC. . AAGAAGCCCGCGUGCCA  
NZ\_CP007027/184967-185020 AUCGUCACCGACCGAAUGCU. CGGCA- . . . . . -UGUUCAGGCC. . AAGAAGCCCGCGUGCCA  
NZ\_CP002871/183231-183284 AUCGUCACCGACCGAAUGCU. CGGCA- . . . . . -UGUUCAGGCC. . AAGAAGCCCGCGUGCCA  
NZ\_CP007803/183165-183218 AUCGUCACCGACCGAAUGCU. CGGCA- . . . . . -UGUUCAGGCC. . AAGAAGCCCGCGUGCCA  
NC\_012943/184908-184961 AUCGUCACCGACCGAAUGCU. CGGCA- . . . . . -UGUUCAGGCC. . AAGAAGCCCGCGUGCCA



NC\_016768/184907-184960 AUCGUCACCGA CCGAAUGCU. CCGCA-- . . . . . -UGUUCAGGCC. AAGAA GCCCGCCGUGCCA  
NC\_018078/184906-184959 AUCGUCACCGA CCGAAUGCU. CCGCA-- . . . . . -UGUUCAGGCC. AAGAA GCCCGCCGUGCCA  
NC\_021054/184956-185009 AUCGUCACCGA CCGAAUGCU. CCGCA-- . . . . . -UGUUCAGGCC. AAGAA GCCCGCCGUGCCA  
NC\_020559/184282-184335 AUCGUCACCGA CCGAAUGCU. CCGCA-- . . . . . -UGUUCAGGCC. AAGAA GCCCGCCGUGCCA  
NC\_022350/185287-185340 AUCGUCACCGA CCGAAUGCU. CCGCA-- . . . . . -UGUUCAGGCC. AAGAA GCCCGCCGUGCCA  
NZ\_AP014573/186176-186229 AUCGUCACCGA CCGAAUGCU. CCGCA-- . . . . . -UGUUCAGGCC. AAGAA GCCCGCCGUGCCA  
NZ\_CP010339/185184-185237 AUCGUCACCGA CCGAAUGCU. CCGCA-- . . . . . -UGUUCAGGCC. AAGAA GCCCGCCGUGCCA  
NZ\_CP010337/185165-185218 AUCGUCACCGA CCGAAUGCU. CCGCA-- . . . . . -UGUUCAGGCC. AAGAA GCCCGCCGUGCCA  
NZ\_CP010340/185418-185471 AUCGUCACCGA CCGAAUGCU. CCGCA-- . . . . . -UGUUCAGGCC. AAGAA GCCCGCCGUGCCA  
NZ\_CP010338/185172-185225 AUCGUCACCGA CCGAAUGCU. CCGCA-- . . . . . -UGUUCAGGCC. AAGAA GCCCGCCGUGCCA  
NZ\_CP009426/182314-182367 AUCGUCACCGA CCGAAUGCU. CCGCA-- . . . . . -UGUUCAGGCC. AAGAA GCCCGCCGUGCCA  
NZ\_CP009427/185032-185085 AUCGUCACCGA CCGAAUGCU. CCGCA-- . . . . . -UGUUCAGGCC. AAGAA GCCCGCCGUGCCA  
NZ\_CP010330/184967-185020 AUCGUCACCGA CCGAAUGCU. CCGCA-- . . . . . -UGUUCAGGCC. AAGAA GCCCGCCGUGCCA  
NZ\_CP007809/182372-182425 AUCGUCACCGA CCGAAUGCU. CCGCA-- . . . . . -UGUUCAGGCC. AAGAA GCCCGCCGUGCCA  
NZ\_CP012506/181412-181465 AUCGUCACCGA CCGAAUGCU. CCGCA-- . . . . . -UGUUCAGGCC. AAGAA GCCCGCCGUGCCA  
NZ\_CP009100/185023-185076 AUCGUCACCGA CCGAAUGCU. CCGCA-- . . . . . -UGUUCAGGCC. AAGAA GCCCGCCGUGCCA  
NZ\_CP009101/184988-185041 AUCGUCACCGA CCGAAUGCU. CCGCA-- . . . . . -UGUUCAGGCC. AAGAA GCCCGCCGUGCCA  
NZ\_CP012090/183231-183284 AUCGUCACCGA CCGAAUGCU. CCGCA-- . . . . . -UGUUCAGGCC. AAGAA GCCCGCCGUGCCA  
NZ\_CP008885/1867745-1867806 ACCAACCCGU AUUC AAGGAG. GAAU AUUGa . . . . . gucGAUUC AUUGCA. AACGC GCCGAGUUCGAGG  
NC\_014169/1864966-1865027 ACCAACCCGU AUUC AAGGAG. GAAU AUUGa . . . . . gucGAUUC AUUGCA. AACGC GCCGAGUUCGAGG  
NZ\_AP012332/84407-84463 AAAACAUCAU AUGCAUAGAU. GCAUAGU . . . . . GUGAUUCU CUCA. AAAGAGAGGAGUUAUGA  
NC\_014644/223569-223625 AAAACAUCAU AUGCAUAGAU. GCAUAGU . . . . . GUGAUUCU CUCA. AAAGAGAGGAGUUAUGA  
NC\_017456/86028-86084 AAAACAUCAU AUGCAUAGAU. GCAUAGU . . . . . GUGAUUCU CUCA. AAAGAGAGGAGUUAUGA  
NZ\_CP024160/1415725-1415774 CAUUGCGAAAUGAC AACGGU. GUC AUU . . . . . UC GUUA . . . . . AUGAC AACGUAAAGACAUU  
NZ\_CP012477/285368-285421 AGGGAAC CAGUGAC AACGGU. GUCAG-- . . . . . UAUUACA UGGA. AAGAG CCGCACGCCAACG  
NZ\_LT706985/1275582-1275638 UUAGAUACGU UCUCAGAGUC. GAGAGCU . . . . . ACAAGAU GACA. AGGAG GUCAGCUAAUGUC  
NZ\_CP009220/2492961-2493014 ACAUCAUUAU CUGCAAAGAC. G-AGCA . . . . . -AGAAGUUGGA. AAGAA GUCGACGCCUUA  
NZ\_CP011112/3020465-3020530 CGAUC AAGCAUUC AAUGAC. GGAGAC AUcgu . . . . . cgaggGUGUCAUC GUCA. AGGUC GACCGGACGAG  
NC\_023036/4181172-4181233 AGCUUGCACG GAUC AAUGGC. GAUCUGuu . . . . . agcUUUUUGAU CACA. AAGGU GUGUAACAAAUCA  
NZ\_CP011022/4181243-4181304 AGCUUGCACG GAUC AAUGGC. GAUCUGuu . . . . . agcUUUUUGAU CACA. AAGGU GUGUAACAAAUCA  
NZ\_CP014475/3983075-3983127 AAAGAGCCGG CAC AACGAU. GUCGUU- . . . . . --UUUCGCCA. GUCGU GCGGUUACCCACG  
NZ\_CP015732/1628239-1628298 UGGAAGUCA CACC AACGAA. GUUGUGAc . . . . . aaCGAACUCAUACA. AAGGG GUAAAAGUUAUG  
NZ\_CP015603/195101-195172 AACGAUUCU UAACAAAGCU. GUGGUCCacggcaa . . . . . agucaucuUGUCUUCAGGCC. AAGAG GCU GAUUAUCUACG  
NC\_014656/304657-304709 ACAUUCUGUUU CACAAAGGA. GUGU- . . . . . -GUACU AUUGGU. UUGAAGGCCUCGACUGGU  
NZ\_CP011542/1400440-1400500 UGAAGAACU UC CGAAUGGU. GCGACCAgc . . . . . acCAUACCCGGCC. AAGCGGCCCGAACACGA  
NC\_008268/7784251-7784307 UGCAGGUCC UGCCAAGGGU. GCGCGGA . . . . . UC GAUGUC GGCA. UGGAAGGCCCGAAUCACU  
NZ\_AP012330/429639-429691 AU AUGUUUAU CAACAAAAA. GUUG- . . . . . -AGACGGUGACA. ACGAC GUUCUACCAAGAA  
NZ\_CP011269/3616949-3617008 AAUACUUAAC CGAU GGCGAC. AUCGUCGa . . . . . ggGAACCAUC GUCA. AGGUUGACCGUGACGAGG  
NZ\_CP014475/2811500-2811559 AAUACUUAAC CGAU GGCGAC. AUCGUCGa . . . . . ggGAACCAUC GUCA. AGGUUGACCGUGACGAGG  
NZ\_CP009914/3626122-3626181 AAUACUUAAC CGAU GGCGAC. AUCGUCGa . . . . . ggGAACCAUC GUCA. AGGUUGACCGUGACGAGG  
NZ\_CP013747/3355696-3355746 ACCAAGAGGU AAACA AUGU. GUUUU . . . . . -CUCCGUCC. AAGAG GACAAAGGCACUG  
NZ\_LT821227/1387665-1387731 GUUAGCUGAU UAACAGCGGU. GUCAGACauaaa . . . . . aauuuUAACAAGCC GACA. AUGGG GUAGUGAUUAUG  
NZ\_CP020567/17269-17329 AUCA AUGGCAC CAGCAUUGAU. GUCGCGAca . . . . . ucAAUGACACAACA. UC GAU GUUGAUCAUGAU  
NZ\_CP023778/8308556-8308608 AUAGCGGCAAC CACAAAGGA. GUGCU- . . . . . -CAUGCU GGUG. AAGAA GCCCGAGGCGAUG  
NC\_014218/123085-123135 GGAUGAAGCU CAGUAAAGAU. ACUGU- . . . . . -UAUU CGGU. AUGUU GCGGAACUAGAAG  
NC\_013174/2323554-2323610 CGAUCGCGGU UCUC AACCGGA. GAGGAAC . . . . . ACCAUGCA CGCA. ACGAC GCGAGCAGUCACC  
NZ\_CP022038/1554011-1554067 CGAUCGCGGU UCUC AACCGGA. GAGGAAC . . . . . ACCAUGCA CGCA. ACGAC GCGAGCAGUCACC  
NZ\_CP011309/641800-641856 UUGUUGAGCU UCUC AAUGCC. GGUAAAC . . . . . AAGUAGUU GUCA. UUGAU GAUCUUUCCAACA  
NZ\_CP022614/638553-638609 UUGUUGAGCU UCUC AAUGCC. GGUAAAC . . . . . AAGUAGUU GUCA. UUGAU GAUCUUUCCAACA  
NC\_009342/735510-735566 UUGUUGAGCU UCUC AAUGCC. GGUAAAC . . . . . AAGUAGUU GUCA. UUGAU GAUCUUUCCAACA  
NC\_021351/722518-722574 UUGUUGAGCU UCUC AAUGCC. GGUAAAC . . . . . AAGUAGUU GUCA. UUGAU GAUCUUUCCAACA  
NC\_021352/722519-722575 UUGUUGAGCU UCUC AAUGCC. GGUAAAC . . . . . AAGUAGUU GUCA. UUGAU GAUCUUUCCAACA  
NZ\_CP014984/636972-637028 UUGUUGAGCU UCUC AAUGCC. GGUAAAC . . . . . AAGUAGUU GUCA. UUGAU GAUCUUUCCAACA  
NZ\_CP009716/2091358-2091409 GUCAUGGUAG CACAGUGAU. GUGGG- . . . . . -UGAUG CUCA. UGGGAGAGCUCUCCGUGG  
NZ\_CP009583/2122575-2122626 GUCAUGGUAG CACAGUGAU. GUGGG- . . . . . -UGAUG CUCA. UGGGAGAGCUCUCCGUGG  
NZ\_CP018762/817552-817601 GGAGUGUUC GAUACAGCGCU. GUAUC- . . . . . -CGAUACA. UAGAU GUAUCCUAAGAGU  
NZ\_CP020567/651063-651111 GUCAAGCGGAUGUC AACCGU. GACAU- . . . . . -AAGUCA. ACGAU GACAGUGCUGGUA  
NZ\_HG917972/2228845-2228895 ACAUUUGAGG CGUUAAUGUA. AACGU- . . . . . -CCAAGGCA. AGGGG GCCUUUUGUUCAC  
NZ\_CP016282/2539403-2539464 AAGCACCUCA ACGCAAAGGA. CCGUCAUcg . . . . . ugaAAGCACUC GUUC. ACGAC GGC CCGGUCAGA  
NZ\_AP012332/1391921-1391978 GAGAUUUACA AAAUAGAGAU. GUUUUUA . . . . . uUUUUCAAAGCA. AAGGAGCUUUUUUAUGA  
NC\_014644/1531024-1531081 GAGAUUUACA AAAUAGAGAU. GUUUUUA . . . . . uUUUUCAAAGCA. AAGGAGCUUUUUUAUGA  
NZ\_AP017369/1657111-1657172 UGCUUAGAUA UAACACCGGU. GUUGUUUug . . . . . aauAAAACAUUGAU. CUGAC AUCUGUCUGACA  
NC\_018681/466426-466485 GUGGCGGCAGAC CACAAAGGA. GUGCUCGa . . . . . ugCUGGUAAGUGC. AUGAAGACGCUGGCGGAC  
NZ\_CP022088/6086749-6086808 GUGGCGGCAGAC CACAAAGGA. GUGCUCGa . . . . . ugCUGGUAAGUGC. AUGAAGACGCUGGCGGAC  
NZ\_CP019229/146474-146536 ACGUA AAGGU CCGAACGCC. GCUGAAGagg . . . . . ccuCUGGCAAGGUCA. AGGAAGGCUGGGGCAAGG  
NC\_017300/1995873-1995926 AGAACAGCUU UAUCGACGUC. GAUGA- . . . . . -ACGCUCAGGCA. AGGCAGCUCCGAUCAUG  
NZ\_CP012837/854118-854171 AGAACAGCUU UAUCGACGUC. GAUGA- . . . . . -ACGCUCAGGCA. AGGCAGCUCCGAUCAUG  
NZ\_CP011474/1998115-1998168 AGAACAGCUU UAUCGACGUC. GAUGA- . . . . . -ACGCUCAGGCA. AGGCAGCUCCGAUCAUG  
NZ\_CP014998/2002902-2002955 AGAACAGCUU UAUCGACGUC. GAUGA- . . . . . -ACGCUCAGGCA. AGGCAGCUCCGAUCAUG  
NZ\_CP019769/1997836-1997889 AGAACAGCUU UAUCGACGUC. GAUGA- . . . . . -ACGCUCAGGCA. AGGCAGCUCCGAUCAUG  
NZ\_CP015309/1989095-1989148 AGAACAGCUU UAUCGACGUC. GAUGA- . . . . . -ACGCUCAGGCA. AGGCAGCUCCGAUCAUG

NZ\_CP019768/854103-854156 AGAACAGCUUUUAUCGACGUC. GAUGA-- . . . . . -ACGCUCAGGCA. . AGGCAGCUUCCGAUCAUG  
NZ\_CP020356/854070-854123 AGAACAGCUUUUAUCGACGUC. GAUGA-- . . . . . -ACGCUCAGGCA. . AGGCAGCUUCCGAUCAUG  
NZ\_CP015100/1997875-1997928 AGAACAGCUUUUAUCGACGUC. GAUGA-- . . . . . -ACGCUCAGGCA. . AGGCAGCUUCCGAUCAUG  
NZ\_CP009927/1997850-1997903 AGAACAGCUUUUAUCGACGUC. GAUGA-- . . . . . -ACGCUCAGGCA. . AGGCAGCUUCCGAUCAUG  
NZ\_AP017457/1187659-1187715 AGCAACAAGUUAGGCGAGUGG. GCUUUCG. . . . . GUGUCGUUUUCA. . AAGCUAGAGAAAAACGACA  
NZ\_CP014518/1024253-1024306 UCUGUGACGCGCCGCAAGAC. GCGGC-- . . . . . -UCCAGGAGGAG. . UCGGAUCCCGUAGGCGAG  
NZ\_CP008953/1154197-1154251 AUACCUUUGCAAGCAAGAG. GCUUUG- . . . . . -CUUGCAAAGCA. . AAAUAGCUUUCACGCUGA  
NC\_018720/389675-389732 AUGUCAGAGUUUCCGAUGAU. GGAAUCU. . . . . gAUACUUGAGCA. . UAGAAGCUUGAGUGAUGA  
  
NZ\_CP017696/170394-170451 AUGUCAGAGUUUCCGAUGAU. GGAAUCU. . . . . gAUACUUGAGCA. . UAGAAGCUUGAGUGAUGA  
NZ\_CP017150/3773876-3773930 AAGAACCUAGUAUUAAUGUU. AAUAU- . . . . . -ACUCGUUCUCA. . AUAAGGAGUUCAGCAAUG  
NC\_014246/1518925-1518981 GAGAAUAUAUGCAGAACCCU. CUGGUUG. . . . . AGGAAUCCGGCA. . AAGCCGCCAUGCGUGAGG  
NC\_017834/363482-363548 AUUAGCAAAAAC- CUJAGGCG. GCGGACGcguuu. . . . . gcgcccAGCUCUAGGCA. . AUGGAGCCACUUGACAGA  
NZ\_CP015235/133127-133189 CACACCACUUCGACAAACGAU. GUCGAAAGgag. . . . . ccuGCCGUGAGGAC. . ACGUAGUCCGAUCGCGUCG  
NZ\_CP015220/3411253-3411315 CACACCACUUCGACAAACGAU. GUCGAAAGgag. . . . . ccuGCCGUGAGGAC. . ACGUAGUCCGAUCGCGUCG  
NZ\_CP014869/2170321-2170380 AGUACUUAACAAGUAGGCGAC. AUCGUUUGa. . . . . ggGCGAAGUCUCA. . AGGUCGACCGUGACGAAAG  
NC\_020133/2276480-2276530 ACAUAUAGAGGCGUUAAUGUA. AACGU- . . . . . -CCAAGGCA. . AGGGGGCCUUUUGUUCAC  
NC\_010612/2346618-2346668 ACAUAUAGAGGCGUUAAUGUA. AACGU- . . . . . -CCAAGGCA. . AGGGGGCCUUUUGUUCAC  
NZ\_CP017717/5653608-5653656 ACACAGCCGAUUGCAACGAU. GACAU- . . . . . -AUGUCA. . ACGAUAGCAUCGAAUCCC  
NZ\_AP017457/1240808-1240861 GCAAAGUUUUAUUGAUGCC. GUUGU- . . . . . -GAAUGAGGCA. . AGGUUGCCACCGUCACCU  
NC\_018142/301894-301959 GGACAAAGCUUAGCAAGUU. GCUA-CCGuau. . . . . gguagUACAACCGAGCA. . UGGGAGUUUACUACUCAAU  
NZ\_AP012323/1744913-1744975 AAACCGCUGGAAACACUGGG. GUUUUGGua. . . . . ccgUCACUGUGUGG. . AGGGCCACACAGUGACG  
NC\_017999/1733319-1733401 AAACCGCUGGAAACACUGGG. GUUUUGGua. . . . . ccgUCACUGUGUGG. . AGGGCCACACAGUGACG  
NC\_014638/1740814-1740876 AAACCGCUGGAAACACUGGG. GUUUUGGua. . . . . ccgUCACUGUGUGG. . AGGGCCACACAGUGACG  
NC\_014616/1713216-1713278 AAACCGCUGGAAACACUGGG. GUUUUGGua. . . . . ccgUCACUGUGUGG. . AGGGCCACACAGUGACG  
NZ\_CP010412/1806907-1806969 AAACCGCUGGAAACACUGGG. GUUUUGGua. . . . . ccgUCACUGUGUGG. . AGGGCCACACAGUGACG  
NC\_017456/324254-324308 AUUUUACAAAGUAGAGAUUU. UUUUU- . . . . . -UAUUCAAAGCA. . AAGGAGCUUUUUAUUAUGA  
NZ\_CP016793/7916360-7916418 UGAUGCAUUUUGAGAGCGCU. CUCAUGUu. . . . . cGUCGCUCUGGCA. . ACGGUGCCGGUGGCGAUC  
NZ\_LN831039/3141672-3141723 AGAAAGGCAGUCGAGAUAA. UCGAU- . . . . . -UGGACGGCA. . AGGUCGCCAUCGUCACCG  
NC\_008596/3078757-3078808 AGAAAGGCAGUCGAGAUAA. UCGAU- . . . . . -UGGACGGCA. . AGGUCGCCAUCGUCACCG  
NC\_018289/3080371-3080422 AGAAAGGCAGUCGAGAUAA. UCGAU- . . . . . -UGGACGGCA. . AGGUCGCCAUCGUCACCG  
NZ\_CP009494/3078802-3078853 AGAAAGGCAGUCGAGAUAA. UCGAU- . . . . . -UGGACGGCA. . AGGUCGCCAUCGUCACCG  
NZ\_CP009495/3078836-3078887 AGAAAGGCAGUCGAGAUAA. UCGAU- . . . . . -UGGACGGCA. . AGGUCGCCAUCGUCACCG  
NZ\_CP009496/3078824-3078875 AGAAAGGCAGUCGAGAUAA. UCGAU- . . . . . -UGGACGGCA. . AGGUCGCCAUCGUCACCG  
NZ\_CP010407/2463683-2463738 ACAAGUACCUCCGCAAGGAC. GCGGCC- . . . . . GGGAACGUGACC. . UGGGAGUCCGUGGCCAAC  
NC\_009342/1256913-1256970 AUUUUAUUCUAGCAGGGGU. GUUGCAU. . . . . cAUGCAUAAACA. . UGGUAGUUUGUGUUAUA  
NZ\_CP021252/192948-193016 AAACCCACCCGCAACUGCU. GUGGUGGcagaac. . . . . ucgucuCUUUGUGGAGCA. . AGGUCGUCUCCGGUCAGU  
NZ\_CP006715/258222-258273 CAGGGGAUUCAGACAAUGCU. GUCUU- . . . . . -ACGACAGCA. . UUGCGGCUAGAUUGGAAU  
NC\_017218/282198-282249 CAGGGGAUUCAGACAAUGCU. GUCUU- . . . . . -ACGACAGCA. . UUGCGGCUAGAUUGGAAU  
NZ\_CP006714/253813-253864 CAGGGGAUUCAGACAAUGCU. GUCUU- . . . . . -ACGACAGCA. . UUGCGGCUAGAUUGGAAU  
NZ\_CP006716/285280-285331 CAGGGGAUUCAGACAAUGCU. GUCUU- . . . . . -ACGACAGCA. . UUGCGGCUAGAUUGGAAU  
NC\_020517/300568-300619 CAGGGGAUUCAGACAAUGCU. GUCUU- . . . . . -ACGACAGCA. . UUGCGGCUAGAUUGGAAU  
NZ\_CP008885/239917-239968 CAGGGGAUUCAGACAAUGCU. GUCUU- . . . . . -ACGACAGCA. . UUGCGGCUAGAUUGGAAU  
NZ\_CP010411/1001169-1001220 CAGGGGAUUCAGACAAUGCU. GUCUU- . . . . . -ACGACAGCA. . UUGCGGCUAGAUUGGAAU  
NC\_014169/239921-239972 CAGGGGAUUCAGACAAUGCU. GUCUU- . . . . . -ACGACAGCA. . UUGCGGCUAGAUUGGAAU  
NZ\_AP012322/1197777-1197844 AACGGCACGGCUGCAUUGCU. GCAGUCGugc. . . . . uuuugcAUUCCAUGGGG. . UCGGGGCCGAAUCCACA  
NZ\_CP011773/4094465-4094521 GACGAGAAGUCGUCUACGAC. GACGAGC. . . . . ACCUCGACUCA. . ACGUCGACGUCGACCAG  
NZ\_AP014658/631129-631190 AUAAAUUAUGGUAAUUGCAa. GUUAUGAUu. . . . . gcUUGGUUUGCGCA. . AUGAAGCGGAGGCUCAAU  
NC\_015052/629092-629153 AUAAAUUAUGGUAAUUGCAa. GUUAUGAUu. . . . . gcUUGGUUUGCGCA. . AUGAAGCGGAGGCUCAAU  
NZ\_LN824140/153738-153799 AUAAAUUAUGGUAAUUGCAa. GUUAUGAUu. . . . . gcUUGGUUUGCGCA. . AUGAAGCGGAGGCUCAAU  
NZ\_CP011965/637500-637561 AUAAAUUAUGGUAAUUGCAa. GUUAUGAUu. . . . . gcUUGGUUUGCGCA. . AUGAAGCGGAGGCUCAAU  
NZ\_CP007287/1691827-1691880 GUGCUCGCCACAACAAAGGA. GUUAU- . . . . . -CCAUGCAGCCA. . AUGUCGGCAUUCACCACA  
NZ\_CP006018/1664773-1664826 GUGCUCGCCACAACAAAGGA. GUUAU- . . . . . -CCAUGCAGCCA. . AUGUCGGCAUUCACCACA  
NZ\_CP012649/2151567-2151628 UACGUCGUCGACGCGAAGGC. GCGUCGCa. . . . . uuuAGCGAACCUGCA. . AGGAUGGACCGGGAGGGA  
NZ\_CP007519/469028-469089 UACGUCGUCGACGCGAAGGC. GCGUCGCa. . . . . uuuAGCGAACCUGCA. . AGGAUGGACCGGGAGGGA  
NZ\_CP007003/1534138-1534199 UACGUCGUCGACGCGAAGGC. GCGUCGCa. . . . . uuuAGCGAACCUGCA. . AGGAUGGACCGGGAGGGA  
NZ\_AP017896/593708-593765 GCUGGAUCCGUCAGAAAGGAU. CUGACAC. . . . . gAUAUCAAAGCA. . ACGCAGUCCCGUCGAAAC  
NC\_013203/432964-433017 UAAUACCCUUCACAAAGGA. GUUA- . . . . . -CUAUGCAGAAA. . AAGACUUUUUAUUGGAAU  
NZ\_CP011546/857513-857566 GCAACAUCGACGGCGUUGAC. GUCGA- . . . . . -UGUUCACUGCA. . UGGGCGCCACCUUGGAAU  
NC\_012704/1439672-1439725 UCUIUGAUUUUGGCAACGUA. GCGCG- . . . . . -UCUUGACCCA. . AUGGUUGGAGCAUUGUGA  
NZ\_CP020468/646951-647003 AUGAUCCUACCUAAUUCGAA. UJAG- . . . . . -GCAGGAGGUCA. . AUGAUAGACUAGCUCUCC  
NC\_009338/4195623-4195679 UGAAGGCGCGGCGCAACGAA. GCGCAGU. . . . . CGCGUCUGUGG. . ACGUCGACGAAUCCGAAU  
NC\_014814/3405303-3405359 UGAAGGCGCGGCGCAACGAA. GCGCAGU. . . . . CGCGUCUGUGG. . ACGUCGACGAAUCCGAAU  
NC\_010168/1070939-1070998 UJAGACCCUUGAUUGAUGAA. AUUAUUAg. . . . . cgUCGAACUUGUCA. . AUGGUAGCUUUCACCUGA  
NZ\_CP015866/4484667-4484722 AACUAUAUUCGCAUAGGG. GCGUA- . . . . . CGGUCACCAGCA. . UGUUCGCCGACACCAGU  
NC\_020506/1149035-1149091 AUACCGAGAAACGUCACCGGC. GACGUAG. . . . . AACAGCCGAAUA. . ACGUAUUUCGUCGGAU  
NC\_014363/208494-208553 UUCGUGGAGUUGCAGAGAU. GCAAAGCu. . . . . ucACCAAGGAGCC. . AAGAUUCUUGUCUCC  
NZ\_CP013979/3880043-3880103 AACAUUCGAAUUGUUGACGUC. AACAUUCCu. . . . . gaUCGGAAGAGCA. . ACGGUUGCCACUUUGAAA  
NZ\_CP006711/1347527-1347579 UCGAUCCCAAGCGCAAGGCG. GCGCU- . . . . . -GGACACUGCU. . UUGGCAGAGGUCGAAAAA  
NZ\_CP006715/1421925-1421977 UCGAUCCCAAGCGCAAGGCG. GCGCU- . . . . . -GGACACUGCU. . UUGGCAGAGGUCGAAAAA  
NC\_017218/822879-822931 UCGAUCCCAAGCGCAAGGCG. GCGCU- . . . . . -GGACACUGCU. . UUGGCAGAGGUCGAAAAA  
NZ\_AP012324/1382356-1382408 UCGAUCCCAAGCGCAAGGCG. GCGCU- . . . . . -GGACACUGCU. . UUGGCAGAGGUCGAAAAA



NZ\_CP006712/1371253-1371305 UCGAUCCAAAGCGCAAGGCG. GCGCU-- . . . . . --GGACACUGCU. .UUGGC**GCA**GGUCGAAAAA  
NZ\_CP006713/1449468-1449520 UCGAUCCAAAGCGCAAGGCG. GCGCU-- . . . . . --GGACACUGCU. .UUGGC**GCA**GGUCGAAAAA  
NZ\_CP006714/1371223-1371275 UCGAUCCAAAGCGCAAGGCG. GCGCU-- . . . . . --GGACACUGCU. .UUGGC**GCA**GGUCGAAAAA  
NZ\_CP006716/1420517-1420569 UCGAUCCAAAGCGCAAGGCG. GCGCU-- . . . . . --GGACACUGCU. .UUGGC**GCA**GGUCGAAAAA  
NC\_020517/1476724-1476776 UCGAUCCAAAGCGCAAGGCG. GCGCU-- . . . . . --GGACACUGCU. .UUGGC**GCA**GGUCGAAAAA  
NZ\_CP009246/1947958-1948017 ACGUCUUGAGCCUCAAGGA. GGGGGGcu. . . . . caGAGCUGGAGACA. ACGAU**GUC**CUCUCCAGC  
NC\_013929/9274780-9274829 AGCAGUCCU**CGAC**AAAGAC. **GUCGU**-- . . . . . ----GCAGAC. AGGAC**GUC**CCCGCGCAC  
NZ\_CP012150/5969296-5969358 AUCAACGACA**UCGC**AACGCU. **GCGA**ACgau. . . . . uucGGUGAUC**GGG**. GCGGU**GCU**CGCCGAGACG  
NZ\_CP011489/1614691-1614744 UCACUUCACG**UAUC**AAUGUU. **GAUGU**-- . . . . . -GAUUGAU**GGCA**. AAGCU**GCU**GCCGAGUUGG

NC\_016782/540599-540658 AAUGCGGUGU**CGCC**AAAGCU. **GGUG**AAAg. . . . . cuCGAU**AUUGGGCA**. GUGGU**GCC**UUUUUUGUU  
NC\_016800/562111-562170 AAUGCGGUGU**CGCC**AAAGCU. **GGUG**AAAg. . . . . cuCGAU**AUUGGGCA**. GUGGU**GCC**UUUUUUGUU  
NC\_016786/540570-540629 AAUGCGGUGU**CGCC**AAAGCU. **GGUG**AAAg. . . . . cuCGAU**AUUGGGCA**. GUGGU**GCC**UUUUUUGUU  
NC\_016802/562291-562350 AAUGCGGUGU**CGCC**AAAGCU. **GGUG**AAAg. . . . . cuCGAU**AUUGGGCA**. GUGGU**GCC**UUUUUUGUU  
NC\_016783/544750-544809 AAUGCGGUGU**CGCC**AAAGCU. **GGUG**AAAg. . . . . cuCGAU**AUUGGGCA**. GUGGU**GCC**UUUUUUGUU  
NZ\_CP018331/2272880-2272939 AAUGCGGUGU**CGCC**AAAGCU. **GGUG**AAAg. . . . . cuCGAU**AUUGGGCA**. GUGGU**GCC**UUUUUUGUU  
NC\_013441/1890247-1890303 ACCGAACUGUC**CGG**AGCGAU. **CGGAUGA**. . . . . GAUUC**CAGGUA**. ACGGC**GAC**UCGCUCGAGU  
NC\_018266/6412928-6412984 UGCCAGGUGA**CGAC**AGUGUU. **GUCG**AUG. . . . . AUGAAGUC**GCCG**. AUGUU**GGC**GAGCGCGAUG  
NC\_017186/6403001-6403057 UGCCAGGUGA**CGAC**AGUGUU. **GUCG**AUG. . . . . AUGAAGUC**GCCG**. AUGUU**GGC**GAGCGCGAUG  
NC\_010168/1005759-1005815 CCAAUUCCGG**CUUC**AACGUU. **GGAG**UCA. . . . . GCAGCGUU**GGG**. AAGAC**GCU**CAAAAAGCAC  
NC\_014830/22856-22911 ACAGUCAUCU**AUGC**AUGGGU. **GCAU**AG-. . . . . UCAGAU**CAUGCA**. CUGGU**GCA**UAGGGCGCCA  
NC\_009338/3798354-3798413 AAUACUUA**CA**CGAU**GGCGAC**. **AUCG**UCGa. . . . . agGGAC**CAUCGUA**. AGGUU**GAC**CGCGACGAAG  
NC\_014814/3014684-3014743 AAUACUUA**CA**CGAU**GGCGAC**. **AUCG**UCGa. . . . . agGGAC**CAUCGUA**. AGGUU**GAC**CGCGACGAAG  
NZ\_CP011773/572894-572950 GACCGUGAU**UGGC**AACGGC. **GCCA**ACG. . . . . GUAA**CCGGCA**. CCGGG**GCA**CGGUGAAA  
NC\_013714/1524937-1524990 AGAACCUGAA**UCG**AAUGGG. **GCCGU**-- . . . . . -UCGUA**UGCA**. CGGAC**GCA**CGAUAGCGUC  
NZ\_AP012326/1524940-1524993 AGAACCUGAA**UCG**AAUGGG. **GCCGU**-- . . . . . -UCGUA**UGCA**. CGGAC**GCA**CGAUAGCGUC  
NZ\_CP010411/1838489-1838541 ACAUUCUGUU**CAC**AAAGGA. **GUGU**-- . . . . . -GCACU**AGGCU**. UUGA**AGCC**UCGCACUGGU  
NZ\_CP015208/226162-226228 ACAUAGU**AUCUAG**AGCGCU. **CUAG**AUUGugaa. . . . . ccacc**ACCAAAU**U**UACG**. GAGA**GUA**U**AGG**CCGUAU  
NZ\_AP017975/3509602-3509660 AUUCAUCC**CGCAGG**GAUGAU. **CCUG**CAGu. . . . . uU**AGGU**CC**GAUCA**. AUGAC**GAU**UCCCUUGGG  
NZ\_CP011883/408604-408663 CGACGUCAGU**CCAG**AUGGUU. **CUGG**UUGa. . . . . agG**CGAAAC**GG**CA**. ACGGC**GCC**ACCAUAGAU  
NC\_008268/2609128-2609176 CAAAA**CGCAU**-**CA**ACGUU. **GCAU**A-. . . . . ----G**AGU**CA. ACGUU**GCA**CUUACGGCA  
NZ\_CP015407/148239-148293 AUGUACUCA**CGGC**AUAGGU. **GUCG**AG-. . . . . -GC**CCGU**U**UGCA**. AUCGU**GCA**UCGAGACGG  
NZ\_CP012649/883231-883287 AUGUACUCA**CGGC**AUAGGU. **GUCG**AG-. . . . . -GC**CCGU**U**UGCA**. AUCGU**GCA**UCGAGACGG  
NZ\_CP007003/232466-232522 AUGGUGGCCU**CGGC**AAGGAC. **GCCG**CUG. . . . . AGGU**AGCU**GG**CCG**. AUGG**AGG**CAGAGGGU**CG**  
NC\_019673/3146208-3146270 AUGGUGGCCU**CGGC**AAGGAC. **GCCG**CUG. . . . . AGGU**AGCU**GG**CCG**. AUGG**AGG**CAGAGGGU**CG**  
NZ\_CP010433/357064-357121 AGAAGAU**GGU**CGAGAGAGUC. **CUCG**UGGacu. . . . . cccUG**GCAAC**CG**CA**. ACGGU**GCG**GAU**UCCG**UG  
NZ\_CP017098/357118-357175 ACCCUAGGC**GCGA**ACGCGU. **UUGC**GCCGA-. . . . . -CGUCU**AGGGCA**. AUGG**AGC**ACUUGACAGA  
NZ\_CP007755/357421-357478 ACCCUAGGC**GCGA**ACGCGU. **UUGC**GCCGA-. . . . . -CGUCU**AGGGCA**. AUGG**AGC**ACUUGACAGA  
NC\_011835/356849-356906 ACCCUAGGC**GCGA**ACGCGU. **UUGC**GCCGA-. . . . . -CGUCU**AGGGCA**. AUGG**AGC**ACUUGACAGA  
NC\_022523/357221-357278 ACCCUAGGC**GCGA**ACGCGU. **UUGC**GCCGA-. . . . . -CGUCU**AGGGCA**. AUGG**AGC**ACUUGACAGA  
NC\_017866/357061-357118 ACCCUAGGC**GCGA**ACGCGU. **UUGC**GCCGA-. . . . . -CGUCU**AGGGCA**. AUGG**AGC**ACUUGACAGA  
NC\_017214/992545-992602 ACCCUAGGC**GCGA**ACGCGU. **UUGC**GCCGA-. . . . . -CGUCU**AGGGCA**. AUGG**AGC**ACUUGACAGA  
NC\_017867/357063-357120 ACCCUAGGC**GCGA**ACGCGU. **UUGC**GCCGA-. . . . . -CGUCU**AGGGCA**. AUGG**AGC**ACUUGACAGA  
NC\_012814/357062-357119 ACCCUAGGC**GCGA**ACGCGU. **UUGC**GCCGA-. . . . . -CGUCU**AGGGCA**. AUGG**AGC**ACUUGACAGA  
NC\_021593/356921-356978 ACCCUAGGC**GCGA**ACGCGU. **UUGC**GCCGA-. . . . . -CGUCU**AGGGCA**. AUGG**AGC**ACUUGACAGA  
NC\_017216/356927-356984 ACCCUAGGC**GCGA**ACGCGU. **UUGC**GCCGA-. . . . . -CGUCU**AGGGCA**. AUGG**AGC**ACUUGACAGA  
NC\_017215/357074-357131 ACCCUAGGC**GCGA**ACGCGU. **UUGC**GCCGA-. . . . . -CGUCU**AGGGCA**. AUGG**AGC**ACUUGACAGA  
NC\_012815/357063-357120 ACCCUAGGC**GCGA**ACGCGU. **UUGC**GCCGA-. . . . . -CGUCU**AGGGCA**. AUGG**AGC**ACUUGACAGA  
NZ\_CP007522/356896-356953 ACCCUAGGC**GCGA**ACGCGU. **UUGC**GCCGA-. . . . . -CGUCU**AGGGCA**. AUGG**AGC**ACUUGACAGA  
NZ\_CP009045/356897-356954 ACCCUAGGC**GCGA**ACGCGU. **UUGC**GCCGA-. . . . . -CGUCU**AGGGCA**. AUGG**AGC**ACUUGACAGA  
NC\_017217/357064-357121 ACCCUAGGC**GCGA**ACGCGU. **UUGC**GCCGA-. . . . . -CGUCU**AGGGCA**. AUGG**AGC**ACUUGACAGA  
NZ\_AP012332/351111-351171 AUUAUGGUUU**UJAG**AAAGGA. **UUA**CAUug. . . . . cgUGAA**CAUUGCA**. AAAC**AGCA**AGUGCCCAUG  
NC\_014644/490215-490275 AUUAUGGUUU**UJAG**AAAGGA. **UUA**CAUug. . . . . cgUGAA**CAUUGCA**. AAAC**AGCA**AGUGCCCAUG  
NC\_017456/1396431-1396491 AUUAUGGUUU**UJAG**AAAGGA. **UUA**CAUug. . . . . cgUGAA**CAUUGCA**. AAAC**AGCA**AGUGCCCAUG  
NC\_013174/2592010-2592060 AGAACUCAA**UUGC**AAUGAC. **GACAC**-- . . . . . ----CGUU**CCCA**. AUGAC**GGG**UGUGACUCCU  
NZ\_CP022038/1246405-1246455 AGAACUCAA**UUGC**AAUGAC. **GACAC**-- . . . . . ----CGUU**CCCA**. AUGAC**GGG**UGUGACUCCU  
NZ\_CP007443/542863-542924 GCAUCAUUUU**UUGC**GAUGAU. **GAU**UUGGuc. . . . . aauAAGGAGAA**GACA**. AUGA**AGUU**CAAAACCAUU  
NZ\_AP012322/439087-439148 GCAUCAUUUU**UUGC**GAUGAU. **GAU**UUGGuc. . . . . aauAAGGAGAA**GACA**. AUGA**AGUU**CAAAACCAUU  
NZ\_CP014241/951500-951561 GCAUCAUUUU**UUGC**GAUGAU. **GAU**UUGGuc. . . . . aauAAGGAGAA**GACA**. AUGA**AGUU**CAAAACCAUU  
NZ\_AP012325/500562-500623 GCAUCAUUUU**UUGC**GAUGAU. **GAU**UUGGuc. . . . . aauAAGGAGAA**GACA**. AUGA**AGUU**CAAAACCAUU  
NZ\_AP012327/557790-557851 GCAUCAUUUU**UUGC**GAUGAU. **GAU**UUGGuc. . . . . aauAAGGAGAA**GACA**. AUGA**AGUU**CAAAACCAUU  
NZ\_AP012330/582181-582242 GCAUCAUUUU**UUGC**GAUGAU. **GAU**UUGGuc. . . . . aauAAGGAGAA**GACA**. AUGA**AGUU**CAAAACCAUU  
NZ\_CP010413/1051877-1051923 UAAUUCUCU**CCAC**AGUGUU. **GUUGU**-- . . . . . ----CGCA. UUUG**AGCGA**UGAAAGAAC  
NZ\_CP019596/1120281-1120327 UAAUUCUCU**CCAC**AGUGUU. **GUUGU**-- . . . . . ----CGCA. UUUG**AGCGA**UGAAAGAAC  
NC\_020517/1198160-1198206 UAAUUCUCU**CCAC**AGUGUU. **GUUGU**-- . . . . . ----CGCA. UUUG**AGCGA**UGAAAGAAC  
NZ\_LT900217/820735-820786 CAACGCGGUGAGAU**AAUGCC**. **AUCCA**-- . . . . . ----ACG**CA**GG**CA**. AUGG**AGCC**UGAAAAUUA  
NZ\_CP016353/2729216-2729267 UAAUUUACUU**UJAC**AAUGCU. **GUCA**A-. . . . . ---AGUUA**CGAA**. GGGAG**UCG**ACCGUGGAGU  
NC\_009077/3939026-3939077 ACCACUUU**UACAUAC**AAUGUU. **GUAUC**-- . . . . . ---UGAGA**UACA**. UGAGU**GUA**UAAAGUGAGU  
NC\_015953/1565172-1565240 GCGAAU**UACAACGC**AACGUU. **GCGU**UGCauuuug. . . . . augcuaGGGG**CGUGCC**. AGGAU**GCA**CAACGCCACG  
NZ\_CP015098/5995780-5995834 GAUCCGUUGU**UUC**AACGAU. **GGAAA**-. . . . . -GCUAC**GUUGCA**. UUCAC**GCA**CCUGGCAACA  
NC\_015656/3985335-3985397 CUGAUGUCAC**UGAC**AUUGAU. **GUCA**CUGaca. . . . . cugAUG**UCGCUAACA**. UGGAU**UUU**AGUCUUGG

NC\_022116/9478370-9478426 AACGCGUCCUGCACAGGGC. GUCGUGCA. . . . . UCGCCGGUGACA. . UCGGC GUCAGUGUCGUCG  
NC\_017186/9468514-9468570 AACGCGUCCUGCACAGGGC. GUCGUGCA. . . . . UCGCCGGUGACA. . UCGGC GUCAGUGUCGUCG  
NC\_018266/9478426-9478482 AACGCGUCCUGCACAGGGC. GUCGUGCA. . . . . UCGCCGGUGACA. . UCGGC GUCAGUGUCGUCG  
NC\_014318/9468454-9468510 AACGCGUCCUGCACAGGGC. GUCGUGCA. . . . . UCGCCGGUGACA. . UCGGC GUCAGUGUCGUCG  
NC\_017834/1890201-1890249 UUGCGUAGCAUGACAGCGUA. GUCAC-- . . . . . AUUGCA. . ACGACGCAUGCCGAAAGG  
NZ\_CP015407/765693-765741 UUGCGUAGCAUGACAGCGUA. GUCAC-- . . . . . AUUGCA. . ACGACGCAUGCCGAAAGG  
NZ\_CP015407/894076-894146 GUAGUUCUUGAUAAACGUU. UUAUCACcaacugg. . . . . cgcguauGCGUCGCAUCA. . AAGAGGAUUGAAGGAAGG  
NZ\_CP017717/4124855-4124911 AGCUGCUCUAUGACAGGGC. GUCAGCG. . . . . GCGUACCGUCC. . UGGACGACGACAAUCACG  
NZ\_CP013129/3448808-3448862 GACAUCUGAUCCACGGGGGA. GUGGUU- . . . . . -CCGAUGCCCA. . ACGGAGGGUUCUGCAAGC  
NZ\_CP013747/2996282-2996339 AACAUAGAAUGUAGACUGGC. UAAACAA. . . . . aAGUUGUUGUCA. . AUGGAGAUAGAAUGGACG  
  
NC\_015738/2989223-2989276 UCGCCCUCAAGAACACGAC. GUUGU-- . . . . . -CAAUGUGGGG. . AUGUCGCCAUUCGAGUGA  
NZ\_CP018002/722867-722929 ACGAUUUCAGAUUGCAGGGA. GCAACUGuga. . . . . aucACAUUUGUGGCA. . ACGUGGCCCGCAAGCAGC  
NZ\_CP010341/852125-852187 ACGAUUUCAGAUUGCAGGGA. GCAACUGuga. . . . . aucACAUUUGUGGCA. . ACGUGGCCCGCAAGCAGC  
NC\_014215/876694-876756 ACGAUUUCAGAUUGCAGGGA. GCAACUGuga. . . . . aucACAUUUGUGGCA. . ACGUGGCCCGCAAGCAGC  
NZ\_LN997841/755184-755246 ACGAUUUCAGAUUGCAGGGA. GCAACUGuga. . . . . aucACAUUUGUGGCA. . ACGUGGCCCGCAAGCAGC  
NZ\_CP014196/2275221-2275286 CCAUCAAGUAUCUACACGAC. GGAGACUcgu. . . . . cgaagGUACUGUCUCA. . AGGUCGACCGCGACGAAG  
NZ\_CP017421/1988841-1988906 CCAUCAAGUAUCUACACGAC. GGAGACUcgu. . . . . cgaagGUACUGUCUCA. . AGGUCGACCGCGACGAAG  
NC\_017308/1945271-1945324 AGAACAGCUUUAUCGACGUC. GAUGA-- . . . . . -GCGUCAAGGCA. . AGGCAGCUUCGGAUCAUG  
NC\_017945/2028099-2028152 AGAACAGCUUUAUCGACGUC. GAUGA-- . . . . . -GCGUCAAGGCA. . AGGCAGCUUCGGAUCAUG  
NC\_017462/1998436-1998489 AGAACAGCUUUAUCGACGUC. GAUGA-- . . . . . -GCGUCAAGGCA. . AGGCAGCUUCGGAUCAUG  
NC\_016781/1998501-1998554 AGAACAGCUUUAUCGACGUC. GAUGA-- . . . . . -GCGUCAAGGCA. . AGGCAGCUUCGGAUCAUG  
NC\_016932/1969760-1969813 AGAACAGCUUUAUCGACGUC. GAUGA-- . . . . . -GCGUCAAGGCA. . AGGCAGCUUCGGAUCAUG  
NC\_017306/1998385-1998438 AGAACAGCUUUAUCGACGUC. GAUGA-- . . . . . -GCGUCAAGGCA. . AGGCAGCUUCGGAUCAUG  
NC\_017301/1988938-1988991 AGAACAGCUUUAUCGACGUC. GAUGA-- . . . . . -GCGUCAAGGCA. . AGGCAGCUUCGGAUCAUG  
NC\_017307/2026638-2026691 AGAACAGCUUUAUCGACGUC. GAUGA-- . . . . . -GCGUCAAGGCA. . AGGCAGCUUCGGAUCAUG  
NC\_018019/2024914-2024967 AGAACAGCUUUAUCGACGUC. GAUGA-- . . . . . -GCGUCAAGGCA. . AGGCAGCUUCGGAUCAUG  
NC\_014329/1998568-1998621 AGAACAGCUUUAUCGACGUC. GAUGA-- . . . . . -GCGUCAAGGCA. . AGGCAGCUUCGGAUCAUG  
NC\_017303/1998109-1998162 AGAACAGCUUUAUCGACGUC. GAUGA-- . . . . . -GCGUCAAGGCA. . AGGCAGCUUCGGAUCAUG  
NC\_017031/1998340-1998393 AGAACAGCUUUAUCGACGUC. GAUGA-- . . . . . -GCGUCAAGGCA. . AGGCAGCUUCGGAUCAUG  
NC\_017305/1995966-1996019 AGAACAGCUUUAUCGACGUC. GAUGA-- . . . . . -GCGUCAAGGCA. . AGGCAGCUUCGGAUCAUG  
NZ\_CP010889/1998442-1998495 AGAACAGCUUUAUCGACGUC. GAUGA-- . . . . . -GCGUCAAGGCA. . AGGCAGCUUCGGAUCAUG  
NZ\_CP012022/2021693-2021746 AGAACAGCUUUAUCGACGUC. GAUGA-- . . . . . -GCGUCAAGGCA. . AGGCAGCUUCGGAUCAUG  
NZ\_CP010795/854778-854831 AGAACAGCUUUAUCGACGUC. GAUGA-- . . . . . -GCGUCAAGGCA. . AGGCAGCUUCGGAUCAUG  
NZ\_CP015183/2060899-2060952 AGAACAGCUUUAUCGACGUC. GAUGA-- . . . . . -GCGUCAAGGCA. . AGGCAGCUUCGGAUCAUG  
NZ\_CP015184/2060913-2060966 AGAACAGCUUUAUCGACGUC. GAUGA-- . . . . . -GCGUCAAGGCA. . AGGCAGCUUCGGAUCAUG  
NZ\_CP015192/2060808-2060861 AGAACAGCUUUAUCGACGUC. GAUGA-- . . . . . -GCGUCAAGGCA. . AGGCAGCUUCGGAUCAUG  
NZ\_CP015185/2060864-2060917 AGAACAGCUUUAUCGACGUC. GAUGA-- . . . . . -GCGUCAAGGCA. . AGGCAGCUUCGGAUCAUG  
NZ\_CP015186/2060782-2060835 AGAACAGCUUUAUCGACGUC. GAUGA-- . . . . . -GCGUCAAGGCA. . AGGCAGCUUCGGAUCAUG  
NZ\_CP015187/2060890-2060943 AGAACAGCUUUAUCGACGUC. GAUGA-- . . . . . -GCGUCAAGGCA. . AGGCAGCUUCGGAUCAUG  
NZ\_CP015188/2060955-2061008 AGAACAGCUUUAUCGACGUC. GAUGA-- . . . . . -GCGUCAAGGCA. . AGGCAGCUUCGGAUCAUG  
NZ\_CP015189/2022444-2022497 AGAACAGCUUUAUCGACGUC. GAUGA-- . . . . . -GCGUCAAGGCA. . AGGCAGCUUCGGAUCAUG  
NZ\_CP015190/2023915-2023968 AGAACAGCUUUAUCGACGUC. GAUGA-- . . . . . -GCGUCAAGGCA. . AGGCAGCUUCGGAUCAUG  
NZ\_CP015191/2060676-2060729 AGAACAGCUUUAUCGACGUC. GAUGA-- . . . . . -GCGUCAAGGCA. . AGGCAGCUUCGGAUCAUG  
NZ\_CP008922/214647-214700 AGAACAGCUUUAUCGACGUC. GAUGA-- . . . . . -GCGUCAAGGCA. . AGGCAGCUUCGGAUCAUG  
NZ\_CP021251/854178-854231 AGAACAGCUUUAUCGACGUC. GAUGA-- . . . . . -GCGUCAAGGCA. . AGGCAGCUUCGGAUCAUG  
NZ\_CP008923/1381638-1381691 AGAACAGCUUUAUCGACGUC. GAUGA-- . . . . . -GCGUCAAGGCA. . AGGCAGCUUCGGAUCAUG  
NZ\_CP012136/2026360-2026413 AGAACAGCUUUAUCGACGUC. GAUGA-- . . . . . -GCGUCAAGGCA. . AGGCAGCUUCGGAUCAUG  
NZ\_CP014341/853653-853706 AGAACAGCUUUAUCGACGUC. GAUGA-- . . . . . -GCGUCAAGGCA. . AGGCAGCUUCGGAUCAUG  
NZ\_CP013699/853655-853708 AGAACAGCUUUAUCGACGUC. GAUGA-- . . . . . -GCGUCAAGGCA. . AGGCAGCUUCGGAUCAUG  
NZ\_CP008924/1018281-1018334 AGAACAGCUUUAUCGACGUC. GAUGA-- . . . . . -GCGUCAAGGCA. . AGGCAGCUUCGGAUCAUG  
NZ\_CP017384/2027288-2027341 AGAACAGCUUUAUCGACGUC. GAUGA-- . . . . . -GCGUCAAGGCA. . AGGCAGCUUCGGAUCAUG  
NZ\_CP013260/2131290-2131343 AGAACAGCUUUAUCGACGUC. GAUGA-- . . . . . -GCGUCAAGGCA. . AGGCAGCUUCGGAUCAUG  
NZ\_CP013261/2027869-2027922 AGAACAGCUUUAUCGACGUC. GAUGA-- . . . . . -GCGUCAAGGCA. . AGGCAGCUUCGGAUCAUG  
NZ\_CP016829/971269-971322 AGAACAGCUUUAUCGACGUC. GAUGA-- . . . . . -GCGUCAAGGCA. . AGGCAGCUUCGGAUCAUG  
NZ\_CP023395/2027958-2028011 AGAACAGCUUUAUCGACGUC. GAUGA-- . . . . . -GCGUCAAGGCA. . AGGCAGCUUCGGAUCAUG  
NZ\_CP013262/2026744-2026797 AGAACAGCUUUAUCGACGUC. GAUGA-- . . . . . -GCGUCAAGGCA. . AGGCAGCUUCGGAUCAUG  
NZ\_CP021982/2025938-2025991 AGAACAGCUUUAUCGACGUC. GAUGA-- . . . . . -GCGUCAAGGCA. . AGGCAGCUUCGGAUCAUG  
NZ\_CP013263/971189-971242 AGAACAGCUUUAUCGACGUC. GAUGA-- . . . . . -GCGUCAAGGCA. . AGGCAGCUUCGGAUCAUG  
NZ\_CP017711/854132-854185 AGAACAGCUUUAUCGACGUC. GAUGA-- . . . . . -GCGUCAAGGCA. . AGGCAGCUUCGGAUCAUG  
NZ\_CP013697/854151-854204 AGAACAGCUUUAUCGACGUC. GAUGA-- . . . . . -GCGUCAAGGCA. . AGGCAGCUUCGGAUCAUG  
NZ\_CP016826/854176-854229 AGAACAGCUUUAUCGACGUC. GAUGA-- . . . . . -GCGUCAAGGCA. . AGGCAGCUUCGGAUCAUG  
NZ\_CP017291/2026292-2026345 AGAACAGCUUUAUCGACGUC. GAUGA-- . . . . . -GCGUCAAGGCA. . AGGCAGCUUCGGAUCAUG  
NZ\_CP017292/2026049-2026102 AGAACAGCUUUAUCGACGUC. GAUGA-- . . . . . -GCGUCAAGGCA. . AGGCAGCUUCGGAUCAUG  
NZ\_CP014543/854160-854213 AGAACAGCUUUAUCGACGUC. GAUGA-- . . . . . -GCGUCAAGGCA. . AGGCAGCUUCGGAUCAUG  
NZ\_CP013146/854414-854467 AGAACAGCUUUAUCGACGUC. GAUGA-- . . . . . -GCGUCAAGGCA. . AGGCAGCUUCGGAUCAUG  
NZ\_CP013327/1998430-1998483 AGAACAGCUUUAUCGACGUC. GAUGA-- . . . . . -GCGUCAAGGCA. . AGGCAGCUUCGGAUCAUG  
NZ\_CP019587/1998550-1998603 AGAACAGCUUUAUCGACGUC. GAUGA-- . . . . . -GCGUCAAGGCA. . AGGCAGCUUCGGAUCAUG  
NZ\_CP013698/854144-854197 AGAACAGCUUUAUCGACGUC. GAUGA-- . . . . . -GCGUCAAGGCA. . AGGCAGCUUCGGAUCAUG  
NZ\_CP012695/854111-854164 AGAACAGCUUUAUCGACGUC. GAUGA-- . . . . . -GCGUCAAGGCA. . AGGCAGCUUCGGAUCAUG  
NC\_018681/3190039-3190100 GUCAAACCAUCCACACGAC. GUGGAACug. . . . . cguGAGGCCUUCUCC. . AAGGC GAUCGUCGACCCG  
NZ\_CP010797/3887305-3887364 AACGAUGCCCAGCACAGGC. GUCGCGCa. . . . . agCAGACCAACGCA. . AUGUCGCGGAUGUAGAC





NZ\_CP017421/4114296-4114351 AAUAAGCAAUGAGCAAUGAU. GUCUG- . . . . . ACCAUGCGUGGU. . CCGGUUCAUGGAACCAAG  
NZ\_CP017421/304879-304935 AUCAGCAAUCUCACCGAC. GAGGAUG. . . . . CGGCCCGGGG. . AAGAGGCUUGGGGUGUU  
NZ\_AP017457/521488-521549 AAAUGGAUCAAGGCAACACC. GCCUUCGug. . . . . cucAUCAGCGAGCA. . CUGGUUCUUGAUGACU  
NZ\_AP017900/5180039-5180104 AACGAUUGGCU CGC GACGGA. GCGCUGGuagc. . . . . aguacAUUUCGUGCGCA. . ACGACGCGGCGCCAAAG  
NZ\_CP017839/6052509-6052574 AACGAUUGGCU CGC GACGGA. GCGCUGGuagc. . . . . aguacAUUUCGUGCGCA. . ACGACGCGGCGCCAAAG  
NZ\_AP012331/1087095-1087156 CUUGUAGUUGUUCAGUGAU. GAAACUAgu. . . . . uacAAAGAAGAACCA. . AGGAAGGUUUUCGCAAUG  
NZ\_CP011402/1266680-1266733 GUGACAAGGUUGGCAAGCU. GCCAA-- . . . . . -GAUCAAGGAAA. . AGGCAUUCUAGGCUUAAAC  
NZ\_CP011311/906581-906635 ACCAGCUCCAUCCGCAAGGUU. GCGAUC- . . . . . -AGGCAAAUAAG. . AAGUUUAUCGACAUUG  
NC\_021252/7469511-7469565 AUACCUUUGCAAGCAAGAG. GCUUUG- . . . . . -CUUGCAAUGCA. . AAAUAGCUUUAUGCUA  
NZ\_AP017900/957359-957415 AAACGGGUGUUCGGAGCU. GGGAGC. . . . . CUUUUGAUUGCA. . AAGCGCAUACGCGUAGU  
NZ\_CP007456/1901199-1901260 AUUAAGAAACAGUACGGGGU. GUUAUAug. . . . . augUAAGCGGAGUCA. . AUGCUGAUUCGACGAAAC  
NZ\_CP017695/1636840-1636906 AAACUUCGUUAUC AUGGCA. GAUUAUGcga. . . . . ccgauUAUUGCGGCA. . AAGGAGCCCAUUGCCG  
  
NC\_003155/2358320-2358373 AUUAGGCGUGUUCAC AUGGCC. GUGAA-- . . . . . -UGUUAUGGGG. . AUGCGGUCGCGCGAAC  
NZ\_CP004350/2910386-2910434 AUAGAUAGUUCCAAACGCU. UUGA-- . . . . . -----CUAACA. . GAGAAGUUUGUCAUAAU  
NC\_002755/2184593-2184643 ACAAAUUCCAUGAAAAGAA. GCAUC- . . . . . ----UGUGUACA. . ACGAAGUAUCUUGGUAGU  
NC\_012522/7609996-7610064 GUUUCAGGGUGUCAAGGU. GAUACGGgugacc. . . . . agggcaUUCAGGGAUGCA. . AGGGUGACACUGGUGACG  
NZ\_CP012649/1750466-1750525 AGUACUUAACGAUGGUGAC. AUCGUUGa. . . . . agGAACCGUAUGCA. . AGGUCGACCGCGACGAGG  
NZ\_CP007519/65751-65810 AGUACUUAACGAUGGUGAC. AUCGUUGa. . . . . agGAACCGUAUGCA. . AGGUCGACCGCGACGAGG  
NZ\_CP007003/1174420-1174479 AGUACUUAACGAUGGUGAC. AUCGUUGa. . . . . agGAACCGUAUGCA. . AGGUCGACCGCGACGAGG  
NC\_021252/4847596-4847645 UAGGAGAUGC GACAAUGGU. GUCG-- . . . . . ----CGAGGCA. . GACCAGCCCGAUGUCACG  
NZ\_AP017369/2337750-2337810 UUUUUAUAGCCAAUGCG. UGGGAAAgc. . . . . acCUAGGAUAAACA. . AUGGUUUUAACAGCAG  
NZ\_CP018151/3018838-3018889 UCCUUGGGAGCCACAGAU. GCGUU- . . . . . ---UUCAACA. . AAGAGGAGUCCGAAUG  
NZ\_CP007490/1202741-1202801 UGAAAUUACUAGCAAAGGC. GCGAUCGc. . . . . gcGCCAAUACCA. . AUGGAGUUGUUUGAAC  
NZ\_CP012649/277195-277245 CCGAAGAACAUGCCAAUGAU. GGCU--- . . . . . ----GAAGGGCC. . ACGAUGCCUUCAAUGAGG  
NZ\_CP007519/2022040-2022090 CCGAAGAACAUGCCAAUGAU. GGCU--- . . . . . ----GAAGGGCC. . ACGAUGCCUUCAAUGAGG  
NZ\_CP007003/82570-82620 CCGAAGAACAUGCCAAUGAU. GGCU--- . . . . . ----GAAGGGCC. . ACGAUGCCUUCAAUGAGG  
NZ\_CP007003/1882400-1882450 CCGAAGAACAUGCCAAUGAU. GGCU--- . . . . . ----GAAGGGCC. . ACGAUGCCUUCAAUGAGG  
NZ\_CP011489/878644-878705 CGAAUGAUUGCACAGGGGA. GUGAUUAag. . . . . ugaGAACCAACAGCA. . AAGCCGCUAACCAUCCAA  
NZ\_AP017896/773606-773660 GAGCAUGGUUCGAAACGAU. UCGGAA- . . . . . -CAUCCGUUGCG. . AAGGAGCACCAUGUUC  
NC\_009342/3018350-3018403 UGAGAGUGCUCAACAAUAU. GUUGU-- . . . . . -GCUUGCCAUCA. . AAGACGGUCCGAGGUGG  
NC\_021351/3044584-3044637 UGAGAGUGCUCAACAAUAU. GUUGU-- . . . . . -GCUUGCCAUCA. . AAGACGGUCCGAGGUGG  
NC\_021352/3044583-3044636 UGAGAGUGCUCAACAAUAU. GUUGU-- . . . . . -GCUUGCCAUCA. . AAGACGGUCCGAGGUGG  
NZ\_CP013991/2972515-2972568 UGAGAGUGCUCAACAAUAU. GUUGU-- . . . . . -GCUUGCCAUCA. . AAGACGGUCCGAGGUGG  
NZ\_CP013859/175802-175856 GAGAGGCUACACCAAAUGAA. GGUGAA- . . . . . -CAAGAGGGCA. . UCGCCGCCUUCGGCGCGA  
NZ\_CP017422/154033-154094 GUGAUCACUCUCGAAGAC. GAGAUAUGcu. . . . . gauUGUCAGCAGACA. . AAGGAGUUGGAAUUGGUG  
NZ\_CP016771/1070090-1070146 CAAAAGCUGGUCAGAAAGUA. CUGAUAC. . . . . UUGAAACAAUA. . AUGAGUUGGCGGCGCAA  
NZ\_CP014518/1617930-1617992 AACAUGCCGUGACAGUGAA. GUCAACGguc. . . . . cguUACAUCCGGCA. . ACUGGGCCGAAUUCGCCC  
NZ\_CP013747/267857-267906 AGGUGGAUGCUGGCAAGCC. GCCCGU- . . . . . -----AUCGCA. . ACGAGGCGACAGAUAGGAG  
NZ\_CP013747/262377-262426 AGGUGGAUGCUGGCAAGCC. GCCCGU- . . . . . -----AUCGCA. . ACGAGGCGACAGAUAGGAG  
NZ\_CP020563/1997129-1997191 AGAUCGGCUACGACGAAGAC. GUCGAGCugg. . . . . agcUCCGUGAGGGCA. . UUGAGGCCACUACCGGCC  
NC\_021177/2195450-2195512 AGAUCGGCUACGACGAAGAC. GUCGAGCugg. . . . . agcUCCGUGAGGGCA. . UUGAGGCCACUACCGGCC  
NZ\_CP020468/2104690-2104738 ACCGCCGACUCACAAAGGA. GUGAU- . . . . . -----UCUUC. . AUGACGAAGUUCGUAAC  
NZ\_AP017896/313728-313776 ACCGCCGACUCACAAAGGA. GUGAU- . . . . . -----UCUUC. . AUGACGAAGUUCGUAAC  
NZ\_CP012070/2479486-2479551 CCAUAAGUAUCUACACGAC. GGAGACUcgu. . . . . cgacgGUGUAUCUGCA. . AGGUCGACCGGACGAGG  
NC\_014246/765457-765509 UGAAAGAAGGAUCCAAUGCU. GGAUA- . . . . . ----ACUUGCGAA. . AUGCAUCGAUUGGAAUG  
NZ\_LN868939/363725-363784 GUGGCGGCAGACAAAGGA. GUGUGCGa. . . . . ugCUGGUGACUGC. . AUGAAGACCUGGCGGGG  
NZ\_CP013747/3777116-3777164 GGCAGAUAUCUAAAGUGAC. UUGC- . . . . . -----AACGCA. . AUGAAGCGAACGGUGAGG  
NZ\_AP012322/854184-854242 UGAUGGCAAGCGUACCGAA. GAUGUCAu. . . . . cuUAUGGAUUGCA. . AGGUUGCAUAGACACGGG  
NZ\_CP013991/672673-672726 CCGUCGAUAUCGACAAAGUU. GUCG- . . . . . -GUUUGUUUGCA. . CCAGAGCAUAGCGAGC  
NZ\_CP007220/1991122-1991172 AGGAAGAUCUCGUAUCGGA. GACGU- . . . . . ----AGUAGGGC. . AUGAGUUCGUCGACGACA  
NC\_011886/357905-357964 ACCUCGUCACGAUACGAA. GAUCCAc. . . . . guACAUCACGCGCA. . AGGACGCGCCGUGAACG  
NC\_018101/1773540-1773605 AAAGUAUCAUCUCGGUGAA. GAGGUACugga. . . . . agaucUCCUCGUCGGUA. . AAGCCACCGUCGGAAGC  
NC\_017317/1691258-1691323 AAAGUAUCAUCUCGGUGAA. GAGGUACugga. . . . . agaucUCCUCGUCGGUA. . AAGCCACCGUCGGAAGC  
NC\_015683/1694931-1694996 AAAGUAUCAUCUCGGUGAA. GAGGUACugga. . . . . agaucUCCUCGUCGGUA. . AAGCCACCGUCGGAAGC  
NZ\_CP011913/1677923-1677988 AAAGUAUCAUCUCGGUGAA. GAGGUACugga. . . . . agaucUCCUCGUCGGUA. . AAGCCACCGUCGGAAGC  
NZ\_CP009716/1642146-1642211 AAAGUAUCAUCUCGGUGAA. GAGGUACugga. . . . . agaucUCCUCGUCGGUA. . AAGCCACCGUCGGAAGC  
NZ\_CP010818/1681236-1681301 AAAGUAUCAUCUCGGUGAA. GAGGUACugga. . . . . agaucUCCUCGUCGGUA. . AAGCCACCGUCGGAAGC  
NZ\_CP009583/1637127-1637192 AAAGUAUCAUCUCGGUGAA. GAGGUACugga. . . . . agaucUCCUCGUCGGUA. . AAGCCACCGUCGGAAGC  
NZ\_CP009500/1681546-1681611 AAAGUAUCAUCUCGGUGAA. GAGGUACugga. . . . . agaucUCCUCGUCGGUA. . AAGCCACCGUCGGAAGC  
NZ\_LT906443/661088-661153 AAAGUAUCAUCUCGGUGAA. GAGGUACugga. . . . . agaucUCCUCGUCGGUA. . AAGCCACCGUCGGAAGC  
NZ\_CP012117/2034033-2034083 ACCAAGUAAUUGCGGAUGUU. GCGCA- . . . . . -----ACAAGUA. . AGGGAGUAGAAUUGCGGA  
NZ\_CP016353/5375179-5375237 GUACAGGCAACCGUACUGUC. ACCGUGUg. . . . . cuAAAUUUGGU. . AUGGUUCAAAAAUAGU  
NZ\_CP014241/1152771-1152827 GCCAUUCCCGAGCAAAAGC. GUUUGC. . . . . GCGUGGGCGCA. . UUGGCGCUCUGCCGAG  
NZ\_CP009249/723165-723214 CCAAGAAGCUGGGCAAGAG. GCUUU- . . . . . -----CUUGGGC. . AAGGCGCCGAGCCGUG  
NC\_013204/1642246-1642309 AUUGUAGCGUGAGCAUCGAU. GCUUUUaac. . . . . acgaACGAGGUUGCA. . AAUUAAGCAUUCUUGCU  
NZ\_LT900217/2055559-2055612 AGGAGGGUUUCUACACCGAC. GUGGU- . . . . . -AGACAAUGGGC. . AGGAGGCCUGGCUCUGG  
NC\_013174/71727-71779 GCUUGACCGAACCGCAAGGC. GCGUC- . . . . . --AUCAGCGCA. . UAGCCGCGCUGACACGAA  
NZ\_CP022038/1017052-1017104 GCUUGACCGAACCGCAAGGC. GCGUC- . . . . . --AUCAGCGCA. . UAGCCGCGCUGACACGAA  
NZ\_CP012390/1356990-1357058 UCAUAACAGUAACAUGCU. GUUAACGgcuuu. . . . . uaucucCGGAGCUACA. . GCGGCUGAGCAAACAG  
NZ\_CP008913/2171805-2171866 AAAUAAAACGCAAGAGUU. UUGCGAcu. . . . . ugaAUGUCGGGGCA. . ACGGCUCUACUCCUAA  
NZ\_CP016775/288544-288594 AAGUUAUGUAUGCCAUUGAU. GGCA- . . . . . ----GCUAAUCA. . UCGACGAUAGGGGAGUAG



NZ\_CP011883/1112421-1112495 AUUAGUUUUGCGGU AAGGGC. GCUAGAGGuguuagugu. aguugacacGUGUCAAGUGCA. . AGGGU GCA CGUUCGCAUA  
NC\_018720/2013775-2013830 UGUCAGCUAUUGUGCAUUGAU. GCAUUA- . . . . . CCAUGCACUGCA. . AUUUU GCAUUAAGUAAG  
NZ\_CP017696/1794532-1794587 UGUCAGCUAUUGUGCAUUGAU. GCAUUA- . . . . . CCAUGCACUGCA. . AUUUU GCAUUAAGUAAG  
NZ\_CP015732/3982498-3982554 CGUAAGCCAUUGUGGAAUGAC. CUACUCG. . . . . AUAGCACA UUCA. . UUGAAGAAUUAUUGGUCCG  
NC\_010545/657867-657914 AUCUGAAUAGCGGU AACGGU. AUCG--- . . . . . GC GGCA. . ACGGC GCCAGCGGUAGCG  
NC\_020230/637433-637480 AUCUGAAUAGCGGU AACGGU. AUCG--- . . . . . GC GGCA. . ACGGC GCCAGCGGUAGCG  
NZ\_LT906481/2346331-2346378 AUCUGAAUAGCGGU AACGGU. AUCG--- . . . . . GC GGCA. . ACGGC GCCAGCGGUAGCG  
NC\_014246/1880212-1880265 AAACUAGAAAGAA AACGUA. UUCGA- . . . . . GGUGUUUGCG. . AAGCU GCU GACCGGUAAG  
NZ\_AP012337/552725-552772 AACAUUUUUUGUC ANNGCA. GCGC--- . . . . . UACGCA. . AUGAAGCCCAAUCGAA  
NZ\_AP012331/2861565-2861616 ACCGUAAUUAUCGGG AAUGAA. UUCGU- . . . . . UCGACGGCA. . AUGAC GUC GAGAACAAGG  
NZ\_CP021140/2885061-2885114 AAAGAAGCAUCGCA AAUGAA. UGCAA- . . . . . UGUAAGGGCC. . AUGAAGCCGUACAUCGGC  
NZ\_CP011541/542146-542196 ACAGAAAAAUAGAC AAAGCG. GUUUA- . . . . . CAUAGACC. . AAGCU GUC CGCUAUGGUG  
NZ\_CP010407/7881746-7881797 UGAUCCCCAGCGA AACGGG. UCGUU- . . . . . ACAUGGACA. . AAGUG GUC GCCAGUGCCG  
  
NC\_015564/932765-932832 GAUCACAUCACUGG GACGGU. CCAGAU Cgccgu. . . . . gccgcaAGGAGAUGUGCA. . AUGAC GAU UGCGAACAAA  
NZ\_CP006850/7515859-7515908 CUAUUCUCUUCUC AACGAA. GAGAA- . . . . . AUCUUA. . AAGAAGAAACAUUCUGA  
NC\_022198/288997-289056 AUUUUGUUCGUGCC AACAUU. GCGGAAGg. . . . . caCCCCGUGGGCA. . AGGAAGCCAAAGAAUACA  
NZ\_CP007699/9065496-9065546 AUGUUCGCGUCGAC AUCGAU. GUCGA- . . . . . UCGG UUC. . UUGGAGACGCCGGGCAGG  
NZ\_CP011502/3448673-3448731 GAGGUUGCCAGA ACAGCAA. GUUCUUUg. . . . . uCGUCUGAA CGCA. . ACGGAGCGCAUUCUCGAC  
NZ\_CP022054/2197898-2197951 AUGGAAUUGGC GCCGGUCU. GCGAA- . . . . . UGGUGUCGGCA. . AUGGC GCCGGUGCCGGAA  
NC\_013204/3050747-3050800 AGAAACUUGUC GGC AAAGAU. GCUAC- . . . . . AGUGAUAGUCA. . ACCCC GAC ACCGGGGAGA  
NZ\_CP020567/6756365-6756418 CAGGAGUACU CCGC AACGCC. GCGGG- . . . . . CGUCAAGGGC. . AAGAAGUCGGGUAUCGGU  
NC\_006361/4424930-4424995 ACGAAAUGGG CUC AACGCC. GACGAACuugc. . . . . cgugCUUACCGCGUCA. . UCGGC GACUCCUGCGAGG  
NZ\_CP015606/213181-213250 GCAAUGGCAACUUC AAAGAC. GAAGACUcguag. . . . . uauuacgAUCCAGUCGUA. . AGGGAUACUACAAGAAU  
NZ\_AP012330/1217319-1217386 UUACACCCCUUC AACGAU. GAGUCGGcgaa. . . . . uaagaaAGGGAUUAUCA. . UGUAUGAUUCAUGGAAA  
NZ\_CP021992/403166-403220 UGUCUAUCUGUAC AACGUU. GUAAU- . . . . . CACUCAGGAGC. . CGGAUGUC CGACCCGACG  
NZ\_CP021417/2207204-2207255 GUCUUGGUAGCCAC AGUGAU. GUGGG- . . . . . UGAUGUCA. . UGGGAGAGCUAUCCGUGG  
NC\_013715/1021609-1021661 GAGGUUAUUUAUGAAAAGUA. UUAUU- . . . . . UUCAGAGCA. . UAGGU GCUUUUAUCCUCG  
NZ\_CP009438/2684812-2684874 GCCGAAGUCAUCGC AAGGCA. GCGACUCaua. . . . . gaaGCCUCUUGUCA. . AGGGU GAUGGCAACCAAG  
NZ\_CP009124/7213751-7213814 CCGCCGCACUUGC AACGAU. GCAGAGAuga. . . . . ugcgUCGCCUUUGCA. . ACGAU GCAUAGCUGAGU  
NC\_018531/4204050-4204106 GUCAUGGAGGCGUC AAAGAU. GAUGUCA. . . . . ACGGUGGGUCA. . GCGAU GACGGCGUCCAGG  
NZ\_AP014658/2064904-2064960 ACGCACUGCUC AACACGAU. GUUCUUU. . . . . CGAUCAAUGCG. . AAGGC GUAUGCGGUGAA  
NZ\_CP013673/2087255-2087311 ACGCACUGCUC AACACGAU. GUUCUUU. . . . . CGAUCAAUGCG. . AAGGC GUAUGCGGUGAA  
NZ\_CP018762/3112412-3112459 AUGCGAAGUAACCC AAAGGA. GGGU- . . . . . UCGUCC. . AUGAAGACCGAAACAGU  
NC\_008711/4054097-4054153 GUCAUGGAGGCGUC AAAGAU. GAUGUCA. . . . . ACGGUGGGUCA. . GCGAU GACGGCGUCCAGG  
NZ\_CP014859/4943111-4943167 GAGUAGUCCGCGCC AUCGAA. GGUGAUC. . . . . AGGUGGAUGGCA. . UCGAC GCCGUCGAAGGCC  
NC\_015953/1508345-1508400 AGGAAUUAUCGCAAC AAUGGC. GUUGUG- . . . . . AAUAUACGGGC. . GAGGC UCCGCAAGGAGAA  
NC\_017093/7744823-7744888 GACAUGUCCGCG GAAGGU. GCGAGAUgccg. . . . . gccggaCGGGCAGCGCA. . ACGGU GCGUUAUACAG  
NC\_018581/5174799-5174857 ACAUUGCGCAUCAC AGGGU. GUGGUCGc. . . . . gCGAAGAUUGCG. . GCGAU GCAAGGCAUGAAG  
NZ\_CP019304/2070139-2070197 ACAGAGCCCGUUUC AAAGGA. GAAAACca. . . . . auGCCCAAAGACA. . UCGGC GUCGCCGUCUUCG  
NZ\_CP011309/2690501-2690553 AAAUCAUGACUAAC AAUGUU. GUUAUC- . . . . . CCGCGAUGG- . . . . . AUGAG- CCUUUAAAGAAG  
NZ\_CP004046/2724605-2724657 AAAUCAUGACUAAC AAUGUU. GUUAUC- . . . . . CCGCGAUGG- . . . . . AUGAG- CCUUUAAAGAAG  
NC\_003450/2735138-2735190 AAAUCAUGACUAAC AAUGUU. GUUAUC- . . . . . CCGCGAUGG- . . . . . AUGAG- CCUUUAAAGAAG  
NC\_006958/2706808-2706860 AAAUCAUGACUAAC AAUGUU. GUUAUC- . . . . . CCGCGAUGG- . . . . . AUGAG- CCUUUAAAGAAG  
NZ\_CP022614/2681703-2681755 AAAUCAUGACUAAC AAUGUU. GUUAUC- . . . . . CCGCGAUGG- . . . . . AUGAG- CCUUUAAAGAAG  
NZ\_AP017557/2685521-2685573 AAAUCAUGACUAAC AAUGUU. GUUAUC- . . . . . CCGCGAUGG- . . . . . AUGAG- CCUUUAAAGAAG  
NC\_020519/2735137-2735189 AAAUCAUGACUAAC AAUGUU. GUUAUC- . . . . . CCGCGAUGG- . . . . . AUGAG- CCUUUAAAGAAG  
NC\_022040/2503351-2503403 AAAUCAUGACUAAC AAUGUU. GUUAUC- . . . . . CCGCGAUGG- . . . . . AUGAG- CCUUUAAAGAAG  
NC\_009342/2734129-2734181 AAAUCAUGACUAAC AAUGUU. GUUAUC- . . . . . CCGCGAUGG- . . . . . AUGAG- CCUUUAAAGAAG  
NC\_021351/2753837-2753889 AAAUCAUGACUAAC AAUGUU. GUUAUC- . . . . . CCGCGAUGG- . . . . . AUGAG- CCUUUAAAGAAG  
NC\_021352/2753836-2753888 AAAUCAUGACUAAC AAUGUU. GUUAUC- . . . . . CCGCGAUGG- . . . . . AUGAG- CCUUUAAAGAAG  
NZ\_CP007724/2573639-2573691 AAAUCAUGACUAAC AAUGUU. GUUAUC- . . . . . CCGCGAUGG- . . . . . AUGAG- CCUUUAAAGAAG  
NZ\_CP016335/2685516-2685568 AAAUCAUGACUAAC AAUGUU. GUUAUC- . . . . . CCGCGAUGG- . . . . . AUGAG- CCUUUAAAGAAG  
NZ\_CP007722/2604044-2604096 AAAUCAUGACUAAC AAUGUU. GUUAUC- . . . . . CCGCGAUGG- . . . . . AUGAG- CCUUUAAAGAAG  
NZ\_CP010451/2601300-2601352 AAAUCAUGACUAAC AAUGUU. GUUAUC- . . . . . CCGCGAUGG- . . . . . AUGAG- CCUUUAAAGAAG  
NZ\_CP012194/2729797-2729849 AAAUCAUGACUAAC AAUGUU. GUUAUC- . . . . . CCGCGAUGG- . . . . . AUGAG- CCUUUAAAGAAG  
NZ\_CP020658/28885-28937 AAAUCAUGACUAAC AAUGUU. GUUAUC- . . . . . CCGCGAUGG- . . . . . AUGAG- CCUUUAAAGAAG  
NZ\_CP013991/2682978-2683030 AAAUCAUGACUAAC AAUGUU. GUUAUC- . . . . . CCGCGAUGG- . . . . . AUGAG- CCUUUAAAGAAG  
NZ\_CP022394/2237537-2237589 AAAUCAUGACUAAC AAUGUU. GUUAUC- . . . . . CCGCGAUGG- . . . . . AUGAG- CCUUUAAAGAAG  
NZ\_CP018175/2705707-2705759 AAAUCAUGACUAAC AAUGUU. GUUAUC- . . . . . CCGCGAUGG- . . . . . AUGAG- CCUUUAAAGAAG  
NZ\_CP018175/2718462-2718514 AAAUCAUGACUAAC AAUGUU. GUUAUC- . . . . . CCGCGAUGG- . . . . . AUGAG- CCUUUAAAGAAG  
NZ\_CP014984/2675966-2676018 AAAUCAUGACUAAC AAUGUU. GUUAUC- . . . . . CCGCGAUGG- . . . . . AUGAG- CCUUUAAAGAAG  
NZ\_CP004062/2716111-2716163 AAAUCAUGACUAAC AAUGUU. GUUAUC- . . . . . CCGCGAUGG- . . . . . AUGAG- CCUUUAAAGAAG  
NZ\_CP018002/1543095-1543147 AUGAUUUCGGCAAC AAUGGU. GUUGUG- . . . . . AAAAACAugACGGAGCUCGGAGCGGAG  
NZ\_CP010341/1613478-1613530 AUGAUUUCGGCAAC AAUGGU. GUUGUG- . . . . . AAAAACAugACGGAGCUCGGAGCGGAG  
NC\_014215/1644617-1644669 AUGAUUUCGGCAAC AAUGGU. GUUGUG- . . . . . AAAAACAugACGGAGCUCGGAGCGGAG  
NZ\_CP012479/3422884-3422948 CUGACGACCGUGGC GAAGAU. GCCGUUGcccu. . . . . ugccGGGUCAUUGCA. . AGGACGACGGGCGCCGAA  
NC\_010816/287383-287435 ACAUUUUGUUC CACA AAGGA. GUGU- . . . . . GCACUAUGGCU. . UUGAAGCCUCGCACUGGU  
NZ\_AP014658/1353107-1353159 ACAUUUUGUUC CACA AAGGA. GUGU- . . . . . GCACUAUGGCU. . UUGAAGCCUCGCACUGGU  
NC\_004307/261947-261999 ACAUUUUGUUC CACA AAGGA. GUGU- . . . . . GCACUAUGGCU. . UUGAAGCCUCGCACUGGU  
NZ\_CP013673/892637-892689 ACAUUUUGUUC CACA AAGGA. GUGU- . . . . . GCACUAUGGCU. . UUGAAGCCUCGCACUGGU  
NZ\_CP010453/1508758-1508810 ACAUUUUGUUC CACA AAGGA. GUGU- . . . . . GCACUAUGGCU. . UUGAAGCCUCGCACUGGU

NC\_015052/1482075-1482127 ACAUUUGUUC CACAAGGA. GUGU --- . . . . . GCACUAU GGU. . UUGAA GCCUCGCACUGGU  
NZ\_LN824140/1010982-1011034 ACAUUUGUUC CACAAGGA. GUGU --- . . . . . GCACUAU GGU. . UUGAA GCCUCGCACUGGU  
NZ\_CP006741/1526578-1526630 ACAUUUGUUC CACAAGGA. GUGU --- . . . . . GCACUAU GGU. . UUGAA GCCUCGCACUGGU  
NC\_015067/1456774-1456826 ACAUUUGUUC CACAAGGA. GUGU --- . . . . . GCACUAU GGU. . UUGAA GCCUCGCACUGGU  
NC\_017221/858703-858755 ACAUUUGUUC CACAAGGA. GUGU --- . . . . . GCACUAU GGU. . UUGAA GCCUCGCACUGGU  
NZ\_CP016019/1497218-1497270 ACAUUUGUUC CACAAGGA. GUGU --- . . . . . GCACUAU GGU. . UUGAA GCCUCGCACUGGU  
NZ\_CP011965/1554627-1554679 ACAUUUGUUC CACAAGGA. GUGU --- . . . . . GCACUAU GGU. . UUGAA GCCUCGCACUGGU  
NZ\_CP011964/1367183-1367235 ACAUUUGUUC CACAAGGA. GUGU --- . . . . . GCACUAU GGU. . UUGAA GCCUCGCACUGGU  
NZ\_CP010407/3227837-3227892 GACAUUCUGU CCGGGGA. GUGUUU . . . . . CCGUAU GGU. . ACGGG GUCUCUGCAAGC  
NZ\_AP012322/606590-606650 GAGCUUUUGU UCUC A AUGAA. GAGGAAAac . . . . . aaAGGAAG UUCA. . AUGAU GAA CAAGCAAUC  
NZ\_CP010411/473578-473639 AUUGACCGGU GGGGAGUU. GCCGCGGcg . . . . . ucaAGGAACAAGCA. . AGGAG GCUUC AUGCUCAA  
NZ\_CP011005/3142370-3142426 AAAGCCACAG CCGC CACGGA. GCCGCGUG . . . . . GGAAUUC UUCA. . AAGAU GUA GGAGAGGUGG  
NC\_016109/778009-778069 AUCGAUGUCA CGAC ACUGAU. GUCGCGAca . . . . . ccUAUGCGG UUCA. . UCGAU GACGCGACACGAA  
NZ\_CP011491/505518-505581 UAUUGAAUUA ACCCAUGGC. GGGUUUA cgc . . . . . ugcgAGCAUUA UUCA. . ACGCU GAAUGAAAAGAGG

NC\_003155/2967226-2967279 UUUUAUCUCGG CGACACGGA. GUCGU -- . . . . . CGUCCAGAC . . . . . AGGAC GUCAAUCAUGGG  
NC\_017834/1206922-1206973 GAAUUGCGU CGGCA AUGCU. GCUUC -- . . . . . ACAUUUUC . . . . . UUGAC GAAUUGACGGAAA  
NZ\_CP015407/1538414-1538465 GAAUUGCGU CGGCA AUGCU. GCUUC -- . . . . . ACAUUUUC . . . . . UUGAC GAAUUGACGGAAA  
NZ\_CP016019/134683-134747 UCCGAAUCGAG CGCAGUGAU. GCGGAAgaga . . . . . uaaaAUGAAGAGUUA. . AAGGAGAUUUUUCAGCU  
NZ\_CP016954/2604770-2604819 GUAGUGUUA CUUACCGCU. GAAAG -- . . . . . GAC CGCU. . AUGAAGCGACUACUUAUU  
NZ\_CP011340/5557595-5557641 UACAAGCUUC UUA AACGGC. UUA -- . . . . . GCGA. . ACGAAGCGCAAGAAAGAA  
NZ\_CP013200/3870873-3870920 GUGACGGUCU UGGCAUGUU. GCCG -- . . . . . GUGGGC. . AUGAC GCCCAACGCGAGG  
NC\_008541/2327690-2327755 CCAUCAAGUA CUUC AACGAC. GGAGACCucgu . . . . . cgaagGUACGUC UUCA. . AGGUC GACCGCAGCAAG  
NC\_018531/2452695-2452760 CCAUCAAGUA CUUC AACGAC. GGAGACCucgu . . . . . cgaagGUACGUC UUCA. . AGGUC GACCGCAGCAAG  
NZ\_CP022436/2675478-2675543 CCAUCAAGUA CUUC AACGAC. GGAGACCucgu . . . . . cgaagGUACGUC UUCA. . AGGUC GACCGCAGCAAG  
NZ\_CP014513/1468876-1468942 UGAAGACGAG AUUCACCGAU. GGAUUCGguc . . . . . cgcgGCCGAUCA UUCA. . AGGGG GCAUGCAGUGGAU  
NZ\_CP014145/2872189-2872238 AGCACCCAU CGUCAGCGUC. GACGCU -- . . . . . UUAACA. . AUGCAGUU GAAAGCAAGG  
NC\_020133/3623588-3623652 AUGUGAAGGC CACC AAGGAC. GUGUC CCGacc . . . . . gaucGAGUUCGA CGCG. . GUGGU GCGCAUUGACACU  
NZ\_HG917972/2608512-2608576 AUGUGAAGGC CACC AAGGAC. GUGUC CCGacc . . . . . gaucGAGUUCGA CGCG. . GUGGU GCGCAUUGACACU  
NC\_010612/2745416-2745480 AUGUGAAGGC CACC AAGGAC. GUGUC CCGacc . . . . . gaucGAGUUCGA CGCG. . GUGGU GCGCAUUGACACU  
NC\_008711/2273818-2273883 CCAUCAAGUA CUUC AACGAC. GGAGACCucgu . . . . . cgaagGUACGUC UUCA. . AGGUC GACCGCAGCAAG  
NC\_011886/2039538-2039603 CCAUCAAGUA CUUC AACGAC. GGAGACCucgu . . . . . cgaagGUACGUC UUCA. . AGGUC GACCGCAGCAAG  
NZ\_CP007456/830090-830149 AUAAAGAAU CGC AAAGGC. GUUGCCA g . . . . . gaAUGUGAU GGA. . AGGUG GUUGCGGUC AAGG  
NC\_009077/1406291-1406347 AAUUC CCGU CGGCGGUGCU. GCCGCGG . . . . . AUGCCGAC GGA. . GGGCC GUC CAUGGACAAG  
NZ\_AP012331/2977227-2977285 ACGAUC CCGC CCGCAUGA. GGGCGCG . . . . . auUCGUUAUG GGA. . AUGAU GCUUACGUAUGA  
NZ\_CP011309/1296793-1296849 AUACCGAGAA CGUCAACGGC. GACGUAG . . . . . AACAGCCGAAUA. . ACGUC AUUCGUCGGAU  
NZ\_CP004046/1333526-1333582 AUACCGAGAA CGUCAACGGC. GACGUAG . . . . . AACAGCCGAAUA. . ACGUC AUUCGUCGGAU  
NZ\_CP013200/1273631-1273692 ACACUAAUAG CAUGA AUGAU. UCUGUGGac . . . . . cagACAUCGUC GGA. . AUGAAGCCUGAGGCUCC  
NZ\_CP009220/1150457-1150513 AUACCGAGAA CGUCAACGGC. GACGUAG . . . . . AACAGCCGAAUA. . ACGUC AUUCGUCGGAU  
NC\_003450/1209941-1209997 AUACCGAGAA CGUCAACGGC. GACGUAG . . . . . AACAGCCGAAUA. . ACGUC AUUCGUCGGAU  
NC\_006958/1211409-1211465 AUACCGAGAA CGUCAACGGC. GACGUAG . . . . . AACAGCCGAAUA. . ACGUC AUUCGUCGGAU  
NZ\_CP022614/1289628-1289684 AUACCGAGAA CGUCAACGGC. GACGUAG . . . . . AACAGCCGAAUA. . ACGUC AUUCGUCGGAU  
NZ\_AP017557/1316640-1316696 AUACCGAGAA CGUCAACGGC. GACGUAG . . . . . AACAGCCGAAUA. . ACGUC AUUCGUCGGAU  
NZ\_AP017369/1359688-1359744 AUACCGAGAA CGUCAACGGC. GACGUAG . . . . . AACAGCCGAAUA. . ACGUC AUUCGUCGGAU  
NC\_020519/1209940-1209996 AUACCGAGAA CGUCAACGGC. GACGUAG . . . . . AACAGCCGAAUA. . ACGUC AUUCGUCGGAU  
NC\_022040/1212837-1212893 AUACCGAGAA CGUCAACGGC. GACGUAG . . . . . AACAGCCGAAUA. . ACGUC AUUCGUCGGAU  
NC\_009342/1352549-1352605 AUACCGAGAA CGUCAACGGC. GACGUAG . . . . . AACAGCCGAAUA. . ACGUC AUUCGUCGGAU  
NC\_021351/1401709-1401765 AUACCGAGAA CGUCAACGGC. GACGUAG . . . . . AACAGCCGAAUA. . ACGUC AUUCGUCGGAU  
NC\_021352/1401708-1401764 AUACCGAGAA CGUCAACGGC. GACGUAG . . . . . AACAGCCGAAUA. . ACGUC AUUCGUCGGAU  
NZ\_CP007724/1259623-1259679 AUACCGAGAA CGUCAACGGC. GACGUAG . . . . . AACAGCCGAAUA. . ACGUC AUUCGUCGGAU  
NZ\_CP016335/1314970-1315026 AUACCGAGAA CGUCAACGGC. GACGUAG . . . . . AACAGCCGAAUA. . ACGUC AUUCGUCGGAU  
NZ\_CP007722/1290440-1290496 AUACCGAGAA CGUCAACGGC. GACGUAG . . . . . AACAGCCGAAUA. . ACGUC AUUCGUCGGAU  
NZ\_CP010451/1286056-1286112 AUACCGAGAA CGUCAACGGC. GACGUAG . . . . . AACAGCCGAAUA. . ACGUC AUUCGUCGGAU  
NZ\_CP012194/1355779-1355835 AUACCGAGAA CGUCAACGGC. GACGUAG . . . . . AACAGCCGAAUA. . ACGUC AUUCGUCGGAU  
NZ\_CP020658/1522631-1522687 AUACCGAGAA CGUCAACGGC. GACGUAG . . . . . AACAGCCGAAUA. . ACGUC AUUCGUCGGAU  
NZ\_CP013991/1310879-1310935 AUACCGAGAA CGUCAACGGC. GACGUAG . . . . . AACAGCCGAAUA. . ACGUC AUUCGUCGGAU  
NZ\_CP022394/865646-865702 AUACCGAGAA CGUCAACGGC. GACGUAG . . . . . AACAGCCGAAUA. . ACGUC AUUCGUCGGAU  
NZ\_CP018175/1323843-1323899 AUACCGAGAA CGUCAACGGC. GACGUAG . . . . . AACAGCCGAAUA. . ACGUC AUUCGUCGGAU  
NZ\_CP014984/1289003-1289059 AUACCGAGAA CGUCAACGGC. GACGUAG . . . . . AACAGCCGAAUA. . ACGUC AUUCGUCGGAU  
NZ\_CP004062/1332273-1332329 AUACCGAGAA CGUCAACGGC. GACGUAG . . . . . AACAGCCGAAUA. . ACGUC AUUCGUCGGAU  
NZ\_CP011546/1596597-1596657 GUGAUAAAAC UCUCACUGC. GGGUUUCg . . . . . cgUUGUCUGAGGGC. . AGGAU GCCGGUGAAGGG  
NC\_022657/7354127-7354175 CUCAGACAGU GAC AACGUU. GUAC -- . . . . . CGGACG . . . . . AUGAC GUGUUAACGGGA  
NZ\_AP017457/749840-749893 CUCACGGAGUU UCUC AACGAG. GAGAA -- . . . . . CCCCAGAUUCA. . AAGGG GAGCGAGAGAU  
NZ\_CP014145/710315-710365 AAGAUCGUGG CGGCAACGGU. GCCGU -- . . . . . CGGCGCC . . . . . AGGAG GCCCGACCUUCU  
NC\_012490/2862037-2862098 ACGUCAAGAC CAGCAAGUG. GCUUGGcc . . . . . ugcAUCGUCAC GGA. . UUGCU GCUUCAGCCUGU  
NZ\_CP008913/533505-533558 AAUUC CUCU UAGCAAGGA. GCUUG -- . . . . . GAUACCU GGA. . AAGGAUCCACA AUGGCAC  
NC\_014363/264364-264414 GUCAAUUUG UC CCAACGAC. GCGC -- . . . . . AUGUGCA. . UGGAU GCAAGAU CGGACG  
NC\_018580/9187-9243 UUCGUGUUG CAGCAAGGUC. GUUUCAG . . . . . GACAAGACAGCA. . GCGGAGCUCGCGUGGAA  
NZ\_CP016076/5692023-5692090 GUGACAUCAU GUCC AACGAU. GGAUUCgaucg . . . . . aguggaUCGAGGAU GUCG. . AUGGAGACGCGACUGUUG  
NZ\_CP016077/5778466-5778533 GUGACAUCAU GUCC AACGAU. GGAUUCgaucg . . . . . aguggaUCGAGGAU GUCG. . AUGGAGACGCGACUGUUG  
NZ\_CP015732/3740542-3740604 AUGACAAGAU CGGCAAUACC. GCCGAGAaga . . . . . ugcGGGCAAG GGA. . AGGAAGCCGCGGCGAGG  
NC\_022198/841374-841433 AGUAUCUCAA CGAUGGUGAC. AUCGUCGa . . . . . agGUACGUC UUCA. . AGGUU GACACGACGAA



NZ\_CP013991/438335-438395 UCAGCGCAAAACACAAUUUU. GUGGUCCag.....gaCAUUUUUAGAA. AAGGUUCUCCUUAAAAU  
NC\_015145/1917982-1918047 CCAUCAAGUAUCUACACGAC. GGAGACCucgu.....cgaagGUACCGUCGUCA. AGGUCGACCGCGAUGAAG  
NZ\_CP013747/4860364-4860429 CCAUCAAGUAUCUACACGAC. GGAGACCucgu.....cgaagGUACCGUCGUCA. AGGUCGACCGCGAUGAAG  
NZ\_CP012479/98837-98904 AAUAUCCGGGCCCCACCGGG. GUGGCGGggcau.....aauaggAAAAGUAAAGCA. AAGGGGCUUUCGGCAUGG  
NZ\_AP017896/2027415-2027467 AUGAUCCUACCUAAUUCGAA. UUAG---.....-GCAGGAGGUCA. ACGAUGACUCAGCUCUCC  
NZ\_CP013200/4027396-4027453 UUCACAAAUCACCAAAUCAU. GGUGGAG.....uAGGACCGGGACA. AGGCCGUCAAUGGAGACA  
NC\_016785/1806266-1806319 ACGAAGCAAAGAAUAAAGGC. AUUGU--.....-UCAAUACGGCA. UGGGUUCUUUAUCGGUG  
NC\_002935/1881442-1881495 ACGAAGCAAAGAAUAAAGGC. AUUGU--.....-UCAAUACGGCA. UGGGUUCUUUAUCGGUG  
NZ\_CP020410/1259650-1259703 ACGAAGCAAAGAAUAAAGGC. AUUGU--.....-UCAAUACGGCA. UGGGUUCUUUAUCGGUG  
NC\_013174/558552-558606 GCAAGGUUAUUUACAUCAU. GUAGAA.....-CAAGUGAAUCG. ACGACGAUUCACGACAGU  
NZ\_CP022038/530242-530296 GCAAGGUUAUUUACAUCAU. GUAGAA.....-CAAGUGAAUCG. ACGACGAUUCACGACAGU  
NZ\_CP011309/1195547-1195604 UUUUAUAUCCUAGCAGGGGU. GUUGCAU.....cAUGCAAUAAACA. UGGUAGUUUGUGUUCACA  
NZ\_CP004046/1235481-1235538 UUUUAUAUCCUAGCAGGGGU. GUUGCAU.....cAUGCAAUAAACA. UGGUAGUUUGUGUUCACA  
NZ\_CP022614/1188383-1188440 UUUUAUAUCCUAGCAGGGGU. GUUGCAU.....cAUGCAAUAAACA. UGGUAGUUUGUGUUCACA  
NZ\_AP017557/1218594-1218651 UUUUAUAUCCUAGCAGGGGU. GUUGCAU.....cAUGCAAUAAACA. UGGUAGUUUGUGUUCACA  
  
NZ\_CP016335/1216979-1217036 UUUUAUAUCCUAGCAGGGGU. GUUGCAU.....cAUGCAAUAAACA. UGGUAGUUUGUGUUCACA  
NZ\_CP010451/1179688-1179745 UUUUAUAUCCUAGCAGGGGU. GUUGCAU.....cAUGCAAUAAACA. UGGUAGUUUGUGUUCACA  
NZ\_CP012194/1257734-1257791 UUUUAUAUCCUAGCAGGGGU. GUUGCAU.....cAUGCAAUAAACA. UGGUAGUUUGUGUUCACA  
NZ\_CP022394/767600-767657 UUUUAUAUCCUAGCAGGGGU. GUUGCAU.....cAUGCAAUAAACA. UGGUAGUUUGUGUUCACA  
NZ\_CP018175/1225797-1225854 UUUUAUAUCCUAGCAGGGGU. GUUGCAU.....cAUGCAAUAAACA. UGGUAGUUUGUGUUCACA  
NZ\_CP014984/1187758-1187815 UUUUAUAUCCUAGCAGGGGU. GUUGCAU.....cAUGCAAUAAACA. UGGUAGUUUGUGUUCACA  
NZ\_CP004062/1234226-1234283 UUUUAUAUCCUAGCAGGGGU. GUUGCAU.....cAUGCAAUAAACA. UGGUAGUUUGUGUUCACA  
NZ\_CP021417/2530701-2530763 AUAGUUGCGCGUUCAAUGAU. GGGGAUUCcg.....gaaCGGGGAAGUCA. UCGGUUCUCGUCGUAU  
NZ\_CP007490/330150-330217 AAGUUUUUUUAGGCGAGGAU. GCCACAGguuac.....auaccCUAUGGAGGACA. ACGAUUCUCAGGAAACC  
NZ\_CP013738/2202088-2202150 AGAUCGCGCUACGACGACGAC. GUCGAGCugg.....agcUCCGUGAGGGCA. UUGAGGCCACUACCGGCC  
NC\_010572/6048357-6048419 AGAUCGCGCUACGACGACGAC. GUCGAGCugg.....agcUCCGUGAGGGCA. UUGAGGCCACUACCGGCC  
NZ\_CP011522/6226773-6226835 AGAUCGCGCUACGACGACGAC. GUCGAGCugg.....agcUCCGUGAGGGCA. UUGAGGCCACUACCGGCC  
NC\_016887/2129175-2129230 AUGGCGCAUUCAGCGCUGAU. GCUGGC.....UGCAUGGUGACA. ACGAAGUCAACGGCGACU  
NZ\_CP015604/718815-718864 GAAAAAUCUCAGGAAAGCC. CCCUU--.....-CGCGGCA. AAUGUGCCUCGCUUCACA  
NZ\_CP014869/378305-378358 AGUUUGAUGAUGCCGCCGGC. GGUGA--.....-AGGCGAUGGCA. AAGAUCCGGCGAUGAUC  
NZ\_CP009244/2511408-2511464 AAAAGUUGUACCCAAUGGC. GGGUGUC.....UUGUUAAUUAUCA. UAGCCGAAAAAUCGACU  
NZ\_CP019705/2597990-2598046 AAAAGUUGUACCCAAUGGC. GGGUGUC.....UUGUUAAUUAUCA. UAGCCGAAAAAUCGACU  
NZ\_CP012677/473061-473110 GGAUUUGCAGCC-CACCGUC. GAGG---.....-GCAUCGGCA. AGGAUCCUCACCAGAAG  
NZ\_AP012327/2152151-2152210 AAUCUUACUUUAGCAAUGGC. GCUGAAAa.....agGAGAAACGAU. AAGCGAUCCGGUAAGAUC  
NZ\_AP017369/2843690-2843740 UAGAUGAACUCGGUCAAGAU. AUCGU--.....-CAGUGGCA. AGGUUGCUUGUGGCGAAA  
NZ\_CP016954/1301520-1301576 UAAUUGACGCUCAACGGCGGG. GUUGGCG.....AUCAUUUCGGCA. UAGGAGUCAUGGGCGUUG  
NZ\_LT635457/581874-581940 UUAGCAGGAGCUAAACCGAA. UUAGUUGuaau.....cugugAUCAGAGCGCA. AAGCAGCGGUAAGGCAGA  
NC\_013124/1724947-1725012 GCGAUUUUCUGUACAGUUU. GUCGUGGuguc.....aaccaACCAAGUCGGCA. ACGAAGCCUCGACCACUC  
NZ\_CP022088/3398943-3399004 GUCAAACCAUCCACACGAC. GUGGAACug.....cgcGAGGCCUUCU. AAGGCGAUCGUCGAUCCG  
NZ\_CP008802/1274459-1274527 AAGAUGACUGCGGAUGCGGU. UCCGUACagccg.....aagucgUAGUAUUCGGCA. ACGGCGCCAAAAACCA  
NZ\_CP022544/1884403-1884464 UAAUACUGUUUCUCACUGUC. GAGCUCca.....uagAUAGAAGGAACA. AGGAGUUUCUCAUGGA  
NZ\_CP011530/3148046-3148105 GCCAUUGCGGAA-CAAUGCC. GCUUCGag.....ccUCGCCAUCGCA. AAGGAGCGAGAACCGAUG  
NC\_010168/1611182-1611245 CAAGCUAUGCCGGCAACGAU. GCCAAUUCgc.....aaggAGACUACACCGCC. AUUGUGCGGAACUUUCA  
NZ\_CP011913/330052-330103 AAUAGGCCGUCU-GAAAGAU. CUAG---.....-CGGAUCGAUCA. UCGGCCGAUUUUUGUCAAU  
NC\_019966/21589-21645 AGUGCGCUGCCUGCAAUGGU. GCAGGUG.....ACGCGGUUGGCC. ACGGAGCCGGGAAGCCGG  
NC\_008618/1278132-1278189 ACGCGCUAAUCCAAUGUU. GGGGUGC.....gCUGGGAACAUCA. AGGAAGAUAAAGUAAGGA  
NZ\_AP012322/565546-565592 GUAACUAUAUUCUCAUAAG. GAGAU--.....-UGCA. AUGUCGCAUAAGAAUAAG  
NZ\_CP014241/1122454-1122500 GUAACUAUAUUCUCAUAAG. GAGAU--.....-UGCA. AUGUCGCAUAAGAAUAAG  
NZ\_CP014196/3630293-3630349 AAUCAGCAUCCUCACCGAC. GAGGAUG.....CGGCCCGGGC. AAGAGGCUUGGGCGUGUU  
NZ\_CP022054/1717377-1717433 CUGACGCUGACGACACGUC. GUUGACG.....CUGAGGUCGUCC. ACGAGGACGAGAAGGACA  
NC\_013174/144170-144235 UCAACCUCACCAUCACGAA. GGUGACUuugu.....ugcggUCAUCGGUGGAA. AUGGGUCCGCGAAAACCA  
NZ\_CP022038/944597-944662 UCAACCUCACCAUCACGAA. GGUGACUuugu.....ugcggUCAUCGGUGGAA. AUGGGUCCGCGAAAACCA  
NC\_010168/2957855-2957917 AAGAACAGAUCCGAGAUAGAC. CUUCUUGggg.....augACCGUCUCGUCA. AAGGUACCGCAACAACU  
NC\_008726/2379255-2379314 ACGAGCGAUGCUCAUCAU. GGGGAACu.....gcAAAUCACGGCA. GCGGAGCCACAUUCGACG  
NZ\_CP013714/212515-212569 AUUAUAGUUGUGGUAACGUU. ACCGCA-.....-UUGAAAUGGUA. AAGGAGCUGAAUUGAUG  
NZ\_AP012326/212517-212571 AUUAUAGUUGUGGUAACGUU. ACCGCA-.....-UUGAAAUGGUA. AAGGAGCUGAAUUGAUG  
NZ\_AP017369/3237161-3237214 UGAGAGUGCUCAACAAUAU. GUUGU--.....-GCUCGCCAUCA. AAGACGGUGCCGAGGUGG  
NZ\_CP016174/3249576-3249634 AACAAACUGGACCGACAGAG. GCGGUGUg.....uUCAUAUACCGCA. AGGCCGCGAUCUCGGGA  
NZ\_CP010453/667887-667947 UAAUUUAUGGUA-UAAUGCA. AGUAUGAau.....ugcUUGGUUUGCGCA. AUGAAGCGGAGGCUCAAU  
NZ\_CP010411/76144-76204 UAAUUUAUGGUA-UAAUGCA. AGUAUGAau.....ugcUUGGUUUGCGCA. AUGAAGCGGAGGCUCAAU  
NZ\_CP006741/766807-766147 UAAUUUAUGGUA-UAAUGCA. AGUAUGAau.....ugcUUGGUUUGCGCA. AUGAAGCGGAGGCUCAAU  
NC\_017221/1643748-1643808 UAAUUUAUGGUA-UAAUGCA. AGUAUGAau.....ugcUUGGUUUGCGCA. AUGAAGCGGAGGCUCAAU  
NZ\_CP018134/2373937-2373993 GAAGAAUCCGCGGCAUCGGC. GCCGUGC.....CAUUCGUGGGCA. UCGCAGCCGUCGCGUGG  
NZ\_CP011269/444224-444284 AUGAUCGACAGUGGCACUGGU. GCCACUGcg.....ccACGACUUCGGCC. UGGAUCCGCCGAGGUGA  
NZ\_CP009914/514977-515037 AUGAUCGACAGUGGCACUGGU. GCCACUGcg.....ccACGACUUCGGCC. UGGAUCCGCCGAGGUGA  
NZ\_CP012677/125110-125174 AUUGUCAUCAAGCGCAGCGU-. GUGCGAUccac.....cccgCCCAGAAACA. AGGGAGUUUUUAUGAAG  
NC\_016782/1194943-1194999 AACUACGUGAGCCCACUGAU. GGGGAUU.....GGUGCAGAGCA. UGUGAGCUACUCGUCACA  
NC\_016786/1194912-1194968 AACUACGUGAGCCCACUGAU. GGGGAUU.....GGUGCAGAGCA. UGUGAGCUACUCGUCACA  
NC\_016788/1194357-1194413 AACUACGUGAGCCCACUGAU. GGGGAUU.....GGUGCAGAGCA. UGUGAGCUACUCGUCACA  
NC\_016790/1161747-1161803 AACUACGUGAGCCCACUGAU. GGGGAUU.....GGUGCAGAGCA. UGUGAGCUACUCGUCACA  
NZ\_CP010412/732893-732949 AUGAUGCGAUGCGCAUGUG. GCGUUCG.....AUGUCAGAAACA. GCGGUUUCCAACGUUUU

NC\_013204/1311510-1311568 UGAAGCCCCGCG-CAUCGAU.GCCGCUAc.....cgGGCUGCUUGGCA..AAGAAGCCUUCUUCGACG  
NZ\_CP021140/2331515-2331573 UGAAGCCCCGCG-CAUCGAU.GCCGCUAc.....cgGGCUGCUUGGCA..AAGAAGCCUUCUUCGACG  
NC\_020990/2012045-2012095 ACGGUGGCCACGGCAAGGAC.GUCGA--.....----CAACGUCA..AGGUCGACUUCACGGUG  
NZ\_CP014485/2289075-2289125 ACGGUGGCCACGGCAAGGAC.GUCGA--.....----CAACGUCA..AGGUCGACUUCACGGUG  
NZ\_CP009211/817633-817686 ACGAGCUGAUGGACAACGGC.GUCGA--.....-GGUGCUUGGCA..UCGACGUCGGCGACAAGG  
NZ\_LT906467/899599-899652 ACGAGCUGAUGGACAACGGC.GUCGA--.....-GGUGCUUGGCA..UCGACGUCGGCGACAAGG  
NZ\_CP018002/2595505-2595555 GGAUCAUGGAACACACAGCU.GUGUU--.....----AUCGGCG..AAGGCCCAAGGCCGAGC  
NZ\_CP010341/2613515-2613565 GGAUCAUGGAACACACAGCU.GUGUU--.....----AUCGGCG..AAGGCCCAAGGCCGAGC  
NC\_014215/2579483-2579533 GGAUCAUGGAACACACAGCU.GUGUU--.....----AUCGGCG..AAGGCCCAAGGCCGAGC  
NZ\_LN997841/2620242-2620292 GGAUCAUGGAACACACAGCU.GUGUU--.....----AUCGGCG..AAGGCCCAAGGCCGAGC  
NZ\_AP012334/1500618-1500669 GCAGUUGUGUCAGCAACGAU.GCUGU--.....---UCAGCGCU..GUGGUUCUGAUCCUCAG  
NC\_015434/4457151-4457207 GACAUAAUCUGUACAAACGGC.GUACGGU.....UUAUCUCGAACA..UGAAUGUUCGAGAUGGAG  
NZ\_CP010827/379174-379234 AAGAUGCAGCUCGGCGCUGAC.GCUGUUGgg.....cgUCAUCAUCGGCA..UUGCCGCCGUCAUCGCCA  
NZ\_CP011773/5271312-5271360 ACUUCAGCGACGGCAGCGGU.GCCGU--.....-----CAGGCA..UCGACGCCGUUGACCCGG  
NZ\_CP017421/3269014-3269070 GCAAGGAGGUGUUCGACGUU.GAAGUAG.....UGGACAACGGCA..GUGAUGCCUUGGUGGAAU  
NZ\_CP014634/1825255-1825308 CAAAUUCUUAACGGCAAGAC.GUCGA--.....-AGCCGUCUCA..UUGGCAGGAAGAGCUGC  
  
NZ\_LT906453/256087-256143 UCGAAAGACAUCUCAACGAC.GAGGAGA.....AUCAGAUAGCA..AUGUGGCUCCUGGACC  
NZ\_CP016174/7928691-7928746 UCGGUUCGUUUCUCAAGAG.GAGAAC.....ACGCGAGUGGCA..ACGGUUCUGAAAGAGCUG  
NZ\_CP012750/2883156-2883212 GCAUUGCGGUCGGCGGUGCC.GCUGAUG.....UCAUCGUUGGCA..ACGACGCCGAUCAUCGCC  
NC\_016516/1290317-1290367 UGAUCGUUCUGAGCAAAGGA.GUUA--.....----CAUAGCA..UUGCCGCUUCAUCGAUC  
NZ\_CP017040/580710-580763 ACGAUGACUCGGAUAUCGAU.GUCGU--.....-CGACGUCGACA..AUUCCGUCCCCGAAAACA  
RF AaaaaucauccaCAAUgaU.Gugguug.....auguaaaagGCA..AuGgaGCcucuaacgAag  
SS\_cons ::::::::::<<<<.....>>>>-----<<<.....>>>::::::::::::
